# Supplementary material for: Copper stress in Staphylococcus aureus leads to adaptive changes in central carbon metabolism
Source: Metallomics. 2018 Nov 16;11(1):183–200. doi: 10.1039/c8mt00239h (PMC6350627; doi:10.1039/c8mt00239h)
Supplement: Supplementary file 2 [file MT-011-C8MT00239H-s002.xlsx]

## Sheet: TSB 1mMCu to TSB
#150811_Waldron_whole_cells, Samples Report created on 05/03/2018
												Quantitative Value (Total Spectra)	Quantitative Value (Total Spectra)	Quantitative Value (Total Spectra)	Quantitative Value (Total Spectra)	Quantitative Value (Total Spectra)	Quantitative Value (Total Spectra)
150811_Waldron_whole_cells												TSB	TSB+1mM Cu	TSB+2.5mM Cu	TM	TM+1mM Cu	TM+1.5mM Cu
												TSB	TSB+1mM Cu	TSB+2.5mM Cu	TM	TM+1mM Cu	TM+1.5mM Cu
#	Visible?	Starred?	Identified Proteins (1462)	Accession Number	Alternate ID	Molecular Weight	Protein Grouping Ambiguity	Fisher's Exact Test (p-value): *(p < 0.00051)	Fold Change by Sample	Quantitative Profile	Taxonomy	150805_SH1000_TSB	150805_SH1000_TSB_1mMCuSO4	150805_SH1000_TSB_2mMCuSO4	150805_SH1000_TSB_TM	150805_SH1000_TSB_TM_1mMCuSO4	150805_SH1000_TSB_TM_2mMCuSO4
1	TRUE	Empty	MULTISPECIES: glyceraldehyde-3-phosphate dehydrogenase [Bacteria]	gi|446201559		36 kDa		< 0.00010	1.4	1mM Cu high, TSB low	unknown	498	700	633	413	369	162		1462 Proteins at
2	TRUE	Empty	RecName: Full=Enolase; AltName: Full=2-phospho-D-glycerate hydro-lyase; AltName: Full=2-phosphoglycerate dehydratase	gi|119369401		47 kDa		0.27	1.1	[]	unknown	744	805	863	377	300	123		92.0% Minimum
3	TRUE	Empty	RecName: Full=Elongation factor Tu; Short=EF-Tu	gi|123098060		43 kDa	TRUE	0.076	1.2	[]	unknown	635	766	493	602	456	97		1 Min # Peptides
4	TRUE	Empty	RecName: Full=Elongation factor G; Short=EF-G	gi|119368769		77 kDa		0.33	1.1	[]	unknown	340	366	247	266	208	115		1.0% Decoy FDR
5	TRUE	Empty	RecName: Full=Elongation factor Ts; Short=EF-Ts	gi|123003472		32 kDa		0.25	1	[]	unknown	172	178	153	116	84	37		217670 Spectra at
6	TRUE	Empty	RecName: Full=50S ribosomal protein L7/L12	gi|109940147		13 kDa	TRUE	0.026	1.3	[]	unknown	326	421	399	394	273	106		96.0% Minimum
7	TRUE	Empty	MULTISPECIES: alkaline shock protein 23 [Bacteria]	gi|446137381		19 kDa		0.0098	0.9	[]	unknown	350	326	321	233	145	26		0.01% Decoy FDR
8	TRUE	Empty	RecName: Full=DNA-directed RNA polymerase subunit beta'; Short=RNAP subunit beta'; AltName: Full=RNA polymerase subunit beta'; AltName: Full=Transcriptase subunit beta'	gi|114152142		135 kDa	TRUE	0.06	0.9	[]	unknown	200	190	137	141	114	74
9	TRUE	Empty	pyruvate dehydrogenase E1 component subunit beta [Staphylococcus aureus]	gi|445990321		35 kDa		< 0.00010	1.6	1mM Cu high, TSB low	unknown	217	343	267	140	131	26
10	TRUE	Empty	RecName: Full=Cold shock protein CspA	gi|118572255		7 kDa	TRUE	0.44	1.1	[]	unknown	281	309	282	229	152	53
11	TRUE	Empty	RecName: Full=Chaperone protein DnaK; AltName: Full=HSP70; AltName: Full=Heat shock 70 kDa protein; AltName: Full=Heat shock protein 70	gi|122539397		66 kDa		0.17	1	[]	unknown	212	215	223	118	110	52
12	TRUE	Empty	RecName: Full=Pyruvate kinase; Short=PK	gi|122539317		63 kDa		0.36	1.1	[]	unknown	196	210	188	121	103	32
13	TRUE	Empty	MULTISPECIES: DNA-binding protein HU [Bacteria]	gi|446966607		10 kDa		0.36	1.2	[]	unknown	235	272	259	211	259	179
14	TRUE	Empty	fructose-bisphosphate aldolase [Staphylococcus aureus]	gi|446954157		33 kDa		< 0.00010	2.3	1mM Cu high, TSB low	unknown	143	327	319	85	98	78
15	TRUE	Empty	MULTISPECIES: fructose-bisphosphate aldolase [Staphylococcus]	gi|447054585		31 kDa		0.29	1	[]	unknown	173	181	167	152	133	35
16	TRUE	Empty	MULTISPECIES: transketolase [Bacteria]	gi|446403588		72 kDa	TRUE	0.065	1.3	[]	unknown	144	191	287	94	113	76
17	TRUE	Empty	MULTISPECIES: DNA-directed RNA polymerase subunit beta [Bacteria]	gi|446841411		133 kDa	TRUE	0.34	1.1	[]	unknown	163	173	137	122	110	50
18	TRUE	Empty	RecName: Full=50S ribosomal protein L2	gi|42559187		30 kDa		0.46	1.1	[]	unknown	82	89	106	60	37	20
19	TRUE	Empty	RecName: Full=Extracellular matrix-binding protein ebh; AltName: Full=ECM-binding protein homolog; Flags: Precursor	gi|122539561		1030 kDa	TRUE	1	INF	[]	unknown	0	0	0	0	1	2
20	TRUE	Empty	branched-chain alpha-keto acid dehydrogenase subunit E2 [Staphylococcus aureus subsp. aureus NCTC 8325]	gi|88194794		46 kDa		0.25	1	[]	unknown	124	126	107	91	106	57
21	TRUE	Empty	pyruvate dehydrogenase E1 component subunit alpha [Staphylococcus aureus]	gi|445957465		41 kDa		0.0066	1.5	[]	unknown	130	193	181	110	87	22
22	TRUE	Empty	RecName: Full=Cell division protein FtsZ	gi|122539740		41 kDa		0.068	1.4	[]	unknown	109	148	123	63	34	5
23	TRUE	Empty	dihydrolipoamide dehydrogenase [Staphylococcus aureus subsp. aureus NCTC 8325]	gi|88194795		49 kDa		0.22	1	[]	unknown	156	159	140	117	124	39
24	TRUE	Empty	RecName: Full=Triosephosphate isomerase; Short=TIM; AltName: Full=Triose-phosphate isomerase	gi|122539967		27 kDa		0.22	1.2	[]	unknown	166	202	220	86	69	38
25	TRUE	Empty	MULTISPECIES: 3-oxoacyl-ACP synthase II [Bacteria]	gi|446003385		44 kDa		0.016	1.4	[]	unknown	125	180	151	111	61	28
26	TRUE	Empty	RecName: Full=Bifunctional autolysin; Includes: RecName: Full=N-acetylmuramoyl-L-alanine amidase; Includes: RecName: Full=Mannosyl-glycoprotein endo-beta-N-acetylglucosaminidase; Flags: Precursor	gi|110832765		137 kDa	TRUE	0.2	1.2	[]	unknown	226	273	151	83	83	48
27	TRUE	Empty	RecName: Full=Alkyl hydroperoxide reductase subunit C; AltName: Full=Peroxiredoxin; AltName: Full=Thioredoxin peroxidase	gi|60391219		21 kDa		0.033	1.5	[]	unknown	57	88	125	27	28	29
28	TRUE	Empty	pyruvate carboxylase [Staphylococcus aureus subsp. aureus NCTC 8325]	gi|88194813		129 kDa	TRUE	0.25	1.2	[]	unknown	147	178	159	115	149	65
29	TRUE	Empty	ribosomal protein S2 [Staphylococcus aureus subsp. aureus NCTC 8325]	gi|87202523		28 kDa	TRUE	0.13	1.3	[]	unknown	125	161	132	98	70	26
30	TRUE	Empty	RecName: Full=Glycine--tRNA ligase; AltName: Full=Glycyl-tRNA synthetase; Short=GlyRS	gi|123291788		54 kDa		0.09	1.3	[]	unknown	151	196	113	70	63	21
31	TRUE	Empty	RecName: Full=Formate--tetrahydrofolate ligase; AltName: Full=Formyltetrahydrofolate synthetase; Short=FHS; Short=FTHFS	gi|122540563		60 kDa		0.38	1.2	[]	unknown	176	204	116	107	92	25
32	TRUE	Empty	RecName: Full=3-hexulose-6-phosphate synthase; Short=HPS; AltName: Full=D-arabino-3-hexulose-6-phosphate formaldehyde lyase	gi|119370766		22 kDa		0.4	1.2	[]	unknown	192	221	253	89	67	14
33	TRUE	Empty	MULTISPECIES: glutamine synthetase [Staphylococcus]	gi|447049347		51 kDa		0.026	1.4	[]	unknown	101	146	95	93	118	84
34	TRUE	Empty	RecName: Full=50S ribosomal protein L23	gi|123003430		11 kDa		0.0011	1.9	[]	unknown	56	104	77	36	13	0
35	TRUE	Empty	MULTISPECIES: 6-phosphogluconate dehydrogenase decarboxylating [Bacteria]	gi|446115852		52 kDa		0.08	1.3	[]	unknown	107	144	123	93	84	38
36	TRUE	Empty	MULTISPECIES: trigger factor [Bacteria]	gi|446049718		49 kDa		0.28	1	[]	unknown	101	103	90	76	63	36
37	TRUE	Empty	RecName: Full=50S ribosomal protein L6	gi|119366648		20 kDa		0.27	1.3	[]	unknown	40	52	44	44	36	17
38	TRUE	Empty	molecular chaperone GroEL [Staphylococcus aureus]	gi|446162790		58 kDa	TRUE	0.39	1.2	[]	unknown	120	140	155	92	69	25
39	TRUE	Empty	MULTISPECIES: phosphate acetyltransferase [Bacteria]	gi|446696935		35 kDa		0.098	1.3	[]	unknown	107	142	135	92	91	44
40	TRUE	Empty	RecName: Full=30S ribosomal protein S6	gi|122540227		12 kDa		0.53	1.1	[]	unknown	59	66	69	32	35	11
41	TRUE	Empty	MULTISPECIES: 50S ribosomal protein L22 [Bacteria]	gi|446309672		13 kDa		0.1	1.4	[]	unknown	51	73	62	35	36	19
42	TRUE	Empty	RecName: Full=Polyribonucleotide nucleotidyltransferase; AltName: Full=Polynucleotide phosphorylase; Short=PNPase	gi|117940102		77 kDa		0.4	1.2	[]	unknown	72	85	91	53	58	22
43	TRUE	Empty	RecName: Full=Isoleucine--tRNA ligase; AltName: Full=Isoleucyl-tRNA synthetase; Short=IleRS	gi|123407059		105 kDa		0.33	1.2	[]	unknown	77	93	67	46	49	23
44	TRUE	Empty	RecName: Full=50S ribosomal protein L1	gi|122540134		25 kDa		0.24	1	[]	unknown	62	60	67	56	52	19
45	TRUE	Empty	thiol peroxidase [Staphylococcus aureus]	gi|446058398		18 kDa	TRUE	0.38	1.2	[]	unknown	76	90	112	62	40	26
46	TRUE	Empty	MULTISPECIES: aspartyl/glutamyl-tRNA(Asn/Gln) amidotransferase subunit B [Bacteria]	gi|446467516		54 kDa	TRUE	0.32	1.2	[]	unknown	79	96	93	60	49	18
47	TRUE	Empty	MULTISPECIES: transglycosylase IsaA [Bacteria]	gi|446673921		24 kDa		0.0098	0.9	[]	unknown	177	152	202	142	144	23
48	TRUE	Empty	MULTISPECIES: 30S ribosomal protein S4 [Bacteria]	gi|446012657		23 kDa		0.11	0.9	[]	unknown	60	52	41	47	56	28
49	TRUE	Empty	Chain B, Structure Of Beta-Ketoacetyl-Coa Reductase (Fabg) From Staphylococcus Aureus Complex With Nadph	gi|374074229		27 kDa	TRUE	0.38	1.1	[]	unknown	88	93	92	63	59	17
50	TRUE	Empty	MULTISPECIES: Molecular chaperone Hsp31 and glyoxalase 3 [Bacteria]	gi|445998549		32 kDa		0.25	1.2	[]	unknown	140	170	151	23	30	19
51	TRUE	Empty	30S ribosomal protein S1 [Staphylococcus aureus subsp. aureus NCTC 8325]	gi|88195210		43 kDa		0.17	1	[]	unknown	105	102	85	64	75	49
52	TRUE	Empty	MULTISPECIES: cysteine synthase [Bacteria]	gi|445979739		33 kDa		< 0.00010	2.3	1mM Cu high, TSB low	unknown	86	195	150	42	48	20
53	TRUE	Empty	RecName: Full=Valine--tRNA ligase; AltName: Full=Valyl-tRNA synthetase; Short=ValRS	gi|122539344		102 kDa		0.39	1	[]	unknown	63	66	68	35	38	17
54	TRUE	Empty	MULTISPECIES: 50S ribosomal protein L15 [Bacteria]	gi|446688728		16 kDa		0.31	1.2	[]	unknown	72	88	79	49	47	6
55	TRUE	Empty	MULTISPECIES: malate:quinone oxidoreductase [Bacteria]	gi|447052795		56 kDa		0.48	1.1	[]	unknown	82	90	68	53	48	10
56	TRUE	Empty	RecName: Full=2,3-bisphosphoglycerate-dependent phosphoglycerate mutase; Short=BPG-dependent PGAM; Short=PGAM; Short=Phosphoglyceromutase; Short=dPGM	gi|122538743		27 kDa		0.059	0.9	[]	unknown	98	86	63	29	61	31
57	TRUE	Empty	MULTISPECIES: formate acetyltransferase [Bacteria]	gi|446817404		85 kDa		< 0.00010	0.7	1mM Cu low, TSB high	unknown	198	147	25	24	3	0
58	TRUE	Empty	RecName: Full=Catalase	gi|126215678		58 kDa	TRUE	0.064	1.5	[]	unknown	58	85	81	27	28	26
59	TRUE	Empty	RecName: Full=ATP synthase subunit beta; AltName: Full=ATP synthase F1 sector subunit beta; AltName: Full=F-ATPase subunit beta	gi|118573755		51 kDa		0.11	0.9	[]	unknown	68	60	50	62	54	14
60	TRUE	Empty	RecName: Full=Glutamyl-tRNA(Gln) amidotransferase subunit A; Short=Glu-ADT subunit A	gi|122539112		53 kDa		0.11	1.4	[]	unknown	69	95	102	58	36	6
61	TRUE	Empty	RecName: Full=Acetate kinase; AltName: Full=Acetokinase	gi|122539308		44 kDa		0.46	1.1	[]	unknown	61	66	56	46	24	9
62	TRUE	Empty	MULTISPECIES: cold-shock protein [Bacteria]	gi|446981826		7 kDa	TRUE	0.4	1.1	[]	unknown	70	74	32	61	7	0
63	TRUE	Empty	RecName: Full=Phosphoglycerate kinase	gi|122539968		43 kDa		0.23	0.9	[]	unknown	48	45	42	40	30	17
64	TRUE	Empty	RecName: Full=Glutamate--tRNA ligase; AltName: Full=Glutamyl-tRNA synthetase; Short=GluRS	gi|123291868		56 kDa		0.49	1.1	[]	unknown	53	58	64	41	36	13
65	TRUE	Empty	RecName: Full=50S ribosomal protein L13	gi|122538869		16 kDa		0.26	1	[]	unknown	46	44	45	39	29	0
66	TRUE	Empty	RecName: Full=ATP-dependent Clp protease ATP-binding subunit ClpC	gi|122063321		91 kDa	TRUE	0.44	1.2	[]	unknown	83	96	114	33	21	6
67	TRUE	Empty	RecName: Full=30S ribosomal protein S3	gi|123003431		24 kDa		0.46	1.2	[]	unknown	19	23	21	9	11	3
68	TRUE	Empty	MULTISPECIES: 30S ribosomal protein S16 [Bacteria]	gi|446190899		10 kDa		0.0084	1.7	[]	unknown	55	93	70	41	33	5
69	TRUE	Empty	putative translaldolase [Staphylococcus aureus subsp. aureus NCTC 8325]	gi|88195596		26 kDa		0.25	1.3	[]	unknown	70	88	109	31	24	10
70	TRUE	Empty	MULTISPECIES: 50S ribosomal protein L5 [Bacteria]	gi|447003568		20 kDa		0.23	1	[]	unknown	71	69	61	41	40	11
71	TRUE	Empty	RecName: Full=50S ribosomal protein L4	gi|122538859		22 kDa		0.52	1.1	[]	unknown	98	109	94	80	65	14
72	TRUE	Empty	RecName: Full=Alkyl hydroperoxide reductase subunit F	gi|3913011		55 kDa		0.0091	1.6	[]	unknown	80	126	141	23	16	11
73	TRUE	Empty	RecName: Full=Arginine--tRNA ligase; AltName: Full=Arginyl-tRNA synthetase; Short=ArgRS	gi|123291835		62 kDa		0.36	1.2	[]	unknown	57	69	70	44	35	12
74	TRUE	Empty	MULTISPECIES: phosphocarrier protein HPr [Bacteria]	gi|446359617		9 kDa		0.21	1	[]	unknown	108	107	74	72	85	31
75	TRUE	Empty	Chain A, Crystal Structure Of Post-catalytic Binary Complex Of Phosphoglycerate Mutase From Staphylococcus Aureus	gi|817598861		57 kDa	TRUE	0.28	1	[]	unknown	70	70	73	25	19	10
76	TRUE	Empty	MULTISPECIES: thioredoxin reductase [Bacteria]	gi|446057108		34 kDa		0.31	1	[]	unknown	72	73	77	33	27	14
77	TRUE	Empty	MULTISPECIES: adenylate kinase [Bacteria]	gi|446944212		24 kDa		0.17	0.9	[]	unknown	52	47	42	37	47	13
78	TRUE	Empty	RecName: Full=Aspartate--tRNA ligase; AltName: Full=Aspartyl-tRNA synthetase; Short=AspRS	gi|123098030		67 kDa		0.35	1	[]	unknown	66	68	73	46	28	6
79	TRUE	Empty	RecName: Full=Uncharacterized protein SAOUHSC_00906	gi|122539893		33 kDa		0.0045	1.7	[]	unknown	60	103	101	56	39	10
80	TRUE	Empty	methionine--tRNA ligase [Staphylococcus aureus]	gi|446973871		75 kDa		0.31	1	[]	unknown	56	56	54	38	26	15
81	TRUE	Empty	aconitate hydratase [Staphylococcus aureus]	gi|446652398		99 kDa		0.047	0.8	[]	unknown	53	41	43	26	13	5
82	TRUE	Empty	MULTISPECIES: serine--tRNA ligase [Bacteria]	gi|446807078		49 kDa		0.3	1	[]	unknown	61	61	67	35	31	13
83	TRUE	Empty	RecName: Full=Phosphoribosylformylglycinamidine synthase subunit PurL; Short=FGAM synthase; AltName: Full=Formylglycinamide ribonucleotide amidotransferase subunit II; Short=FGAR amidotransferase II; Short=FGAR-AT II; AltName: Full=Glutamine amidotransferase PurL; AltName: Full=Phosphoribosylformylglycinamidine synthase subunit II	gi|123098049		80 kDa		0.15	1.3	[]	unknown	97	126	70	75	58	9
84	TRUE	Empty	RecName: Full=Lysine--tRNA ligase; AltName: Full=Lysyl-tRNA synthetase; Short=LysRS	gi|123098061		57 kDa		0.5	1.1	[]	unknown	60	66	67	38	31	16
85	TRUE	Empty	MULTISPECIES: 30S ribosomal protein S9 [Bacteria]	gi|487706315		15 kDa	TRUE	0.05	1.5	[]	unknown	59	88	81	67	52	14
86	TRUE	Empty	RecName: Full=30S ribosomal protein S7	gi|110282992		18 kDa		0.48	1.1	[]	unknown	47	54	47	45	42	33
87	TRUE	Empty	leucyl-tRNA synthetase [Staphylococcus aureus]	gi|447031476		92 kDa	TRUE	0.37	1.2	[]	unknown	52	63	61	38	26	10
88	TRUE	Empty	RecName: Full=UPF0342 protein SAOUHSC_01977	gi|122539212		13 kDa		0.063	1.4	[]	unknown	69	99	78	52	63	43
89	TRUE	Empty	SecA [Staphylococcus aureus subsp. aureus NCTC 8325]	gi|2078390		96 kDa	TRUE	0.39	1.2	[]	unknown	57	68	57	36	21	2
90	TRUE	Empty	ribonucleotide-diphosphate reductase subunit alpha [Staphylococcus aureus subsp. aureus NCTC 8325]	gi|88194507		83 kDa		0.26	1	[]	unknown	66	65	75	18	11	3
91	TRUE	Empty	oligoendopeptidase F [Staphylococcus aureus]	gi|446004876		70 kDa		0.43	1.1	[]	unknown	52	55	51	32	25	15
92	TRUE	Empty	lactate dehydrogenase [Staphylococcus aureus]	gi|446954630		35 kDa	TRUE	0.51	1.1	[]	unknown	75	83	48	49	49	12
93	TRUE	Empty	MULTISPECIES: glucose-6-phosphate 1-dehydrogenase [Bacteria]	gi|446027215		57 kDa		0.4	1.2	[]	unknown	51	61	59	28	22	16
94	TRUE	Empty	peptidase M29 [Staphylococcus aureus]	gi|446108411		47 kDa		0.38	1	[]	unknown	56	58	68	45	37	20
95	TRUE	Empty	phosphoenolpyruvate-protein phosphotransferase [Staphylococcus aureus subsp. aureus NCTC 8325]	gi|88194782		63 kDa		0.49	1.1	[]	unknown	73	80	94	56	41	13
96	TRUE	Empty	RecName: Full=50S ribosomal protein L10	gi|122540133		18 kDa		0.26	1.3	[]	unknown	54	69	51	51	40	19
97	TRUE	Empty	DNA polymerase I [Staphylococcus aureus subsp. aureus NCTC 8325]	gi|88195497		99 kDa		0.51	1.1	[]	unknown	52	59	52	21	15	2
98	TRUE	Empty	RecName: Full=Putative dipeptidase SAOUHSC_01868	gi|122539278		53 kDa		0.084	1.5	[]	unknown	50	73	59	39	34	15
99	TRUE	Empty	MULTISPECIES: glucosamine-6-phosphate isomerase [Bacteria]	gi|447173968		22 kDa		0.24	1	[]	unknown	60	58	50	36	40	13
100	TRUE	Empty	MULTISPECIES: inosine-5-monophosphate dehydrogenase [Staphylococcus]	gi|446186216		53 kDa		0.36	1.2	[]	unknown	44	54	67	23	17	9
101	TRUE	Empty	RecName: Full=50S ribosomal protein L21	gi|119365986		11 kDa		0.5	1.1	[]	unknown	51	58	51	38	50	16
102	TRUE	Empty	MULTISPECIES: general stress protein [Bacteria]	gi|446085428		19 kDa		0.18	1.3	[]	unknown	72	94	88	51	28	7
103	TRUE	Empty	MULTISPECIES: thioredoxin [Bacteria]	gi|446941672		11 kDa		0.41	1.1	[]	unknown	57	60	65	28	28	22
104	TRUE	Empty	RecName: Full=Putative aldehyde dehydrogenase SAOUHSC_02363	gi|122538947		52 kDa		0.51	1.1	[]	unknown	63	71	80	32	24	6
105	TRUE	Empty	RecName: Full=50S ribosomal protein L3	gi|123291758		24 kDa		0.11	1.7	[]	unknown	18	30	21	27	29	6
106	TRUE	Empty	RecName: Full=Threonine--tRNA ligase; AltName: Full=Threonyl-tRNA synthetase; Short=ThrRS	gi|123003455		74 kDa		0.33	1	[]	unknown	61	62	59	40	22	2
107	TRUE	Empty	RecName: Full=30S ribosomal protein S13	gi|122538866		14 kDa		0.19	0.9	[]	unknown	55	51	43	62	59	27
108	TRUE	Empty	RecName: Full=DNA topoisomerase 4 subunit A; AltName: Full=Topoisomerase IV subunit A	gi|114152111		91 kDa		0.36	1.3	[]	unknown	15	20	16	16	10	5
109	TRUE	Empty	RecName: Full=Succinyl-CoA ligase [ADP-forming] subunit beta; AltName: Full=Succinyl-CoA synthetase subunit beta; Short=SCS-beta	gi|122539701		42 kDa		0.14	0.9	[]	unknown	77	71	55	50	46	17
110	TRUE	Empty	RecName: Full=Translation initiation factor IF-2	gi|123407128		78 kDa		0.36	1.2	[]	unknown	63	76	56	55	30	15
111	TRUE	Empty	RecName: Full=GMP synthase [glutamine-hydrolyzing]; AltName: Full=GMP synthetase; AltName: Full=Glutamine amidotransferase	gi|122540206		58 kDa		0.23	0.9	[]	unknown	50	47	41	23	12	4
112	TRUE	Empty	MULTISPECIES: peptidyl-prolyl cis-trans isomerase [Bacteria]	gi|445957203		22 kDa		0.00052	2.3	[]	unknown	31	70	56	17	16	7
113	TRUE	Empty	MULTISPECIES: ribonuclease J 1 [Bacteria]	gi|446734119		63 kDa		0.2	1.3	[]	unknown	52	69	66	42	27	13
114	TRUE	Empty	RecName: Full=Pyridoxal 5'-phosphate synthase subunit PdxS; Short=PLP synthase subunit PdxS; AltName: Full=Pdx1	gi|122540138		32 kDa		0.52	1.1	[]	unknown	47	52	65	45	29	7
115	TRUE	Empty	RecName: Full=50S ribosomal protein L18	gi|115504959		13 kDa		0.13	1.5	[]	unknown	31	46	35	34	8	0
116	TRUE	Empty	RecName: Full=Carbamoyl-phosphate synthase large chain; AltName: Full=Carbamoyl-phosphate synthetase ammonia chain	gi|122539724		117 kDa		0.31	1	[]	unknown	57	57	40	38	29	5
117	TRUE	Empty	hydroxymethylglutaryl-CoA synthase [Staphylococcus aureus]	gi|446074119 (+1)		43 kDa		0.38	1.2	[]	unknown	69	82	67	41	26	7
118	TRUE	Empty	nicotinate phosphoribosyltransferase, putative [Staphylococcus aureus subsp. aureus NCTC 8325]	gi|87203371		55 kDa		0.34	1	[]	unknown	45	45	38	27	24	6
119	TRUE	Empty	RecName: Full=Proline--tRNA ligase; AltName: Full=Prolyl-tRNA synthetase; Short=ProRS	gi|114152255		64 kDa		0.33	1	[]	unknown	48	48	52	31	20	1
120	TRUE	Empty	RecName: Full=Alanine--tRNA ligase; AltName: Full=Alanyl-tRNA synthetase; Short=AlaRS	gi|122539371		99 kDa		0.53	1.1	[]	unknown	45	50	42	24	28	4
121	TRUE	Empty	branched-chain-amino acid aminotransferase [Staphylococcus aureus]	gi|445998181		40 kDa		0.097	1.4	[]	unknown	50	72	68	33	23	12
122	TRUE	Empty	MULTISPECIES: 30S ribosomal protein S19 [Bacteria]	gi|446046498		11 kDa		0.55	1.1	[]	unknown	14	16	12	15	37	3
123	TRUE	Empty	RecName: Full=Aerobic glycerol-3-phosphate dehydrogenase	gi|122063486		62 kDa		0.089	0.8	[]	unknown	58	49	36	21	19	1
124	TRUE	Empty	RecName: Full=D-alanine--poly(phosphoribitol) ligase subunit 1; AltName: Full=D-alanine-D-alanyl carrier protein ligase; Short=DCL; AltName: Full=D-alanine-activating enzyme; Short=DAE	gi|122539917		55 kDa		0.019	1.7	[]	unknown	39	67	69	28	56	39
125	TRUE	Empty	betaine aldehyde dehydrogenase [Staphylococcus aureus subsp. aureus NCTC 8325]	gi|88196560		55 kDa		0.52	1.1	[]	unknown	46	52	47	5	5	0
126	TRUE	Empty	RecName: Full=ATP-dependent Clp protease ATP-binding subunit ClpL	gi|119368567		78 kDa		0.078	0.9	[]	unknown	103	93	93	26	21	0
127	TRUE	Empty	glutamine--fructose-6-phosphate aminotransferase [isomerizing] [Staphylococcus aureus]	gi|446256610		66 kDa		0.52	1.1	[]	unknown	47	52	40	30	23	8
128	TRUE	Empty	hypothetical protein SAOUHSC_00144 [Staphylococcus aureus subsp. aureus NCTC 8325]	gi|88193956		273 kDa		0.31	0.9	[]	unknown	18	16	0	3	0	0
129	TRUE	Empty	MULTISPECIES: DNA-directed RNA polymerase subunit alpha [Bacteria]	gi|446491795		35 kDa		0.45	1.2	[]	unknown	41	48	41	47	31	20
130	TRUE	Empty	CoA disulfide reductase [Staphylococcus aureus]	gi|447047269		49 kDa		0.39	1	[]	unknown	40	41	65	16	7	3
131	TRUE	Empty	ATP-dependent Clp protease ATP-binding subunit ClpB [Staphylococcus aureus]	gi|446276115		98 kDa	TRUE	0.3	1	[]	unknown	46	45	64	15	11	2
132	TRUE	Empty	RecName: Full=3-oxoacyl-[acyl-carrier-protein] synthase 3; AltName: Full=3-oxoacyl-[acyl-carrier-protein] synthase III; AltName: Full=Beta-ketoacyl-ACP synthase III; Short=KAS III	gi|122539881		34 kDa		0.54	1.1	[]	unknown	44	49	45	40	34	5
133	TRUE	Empty	MULTISPECIES: DNA polymerase III subunit beta [Bacteria]	gi|446892555		42 kDa		0.25	1.3	[]	unknown	47	61	58	23	12	0
134	TRUE	Empty	RecName: Full=50S ribosomal protein L27	gi|122539354		10 kDa		0.51	1.2	[]	unknown	26	30	22	5	3	2
135	TRUE	Empty	acetolactate synthase [Staphylococcus aureus subsp. aureus NCTC 8325]	gi|88196120		61 kDa		0.27	1	[]	unknown	79	79	62	6	3	0
136	TRUE	Empty	MULTISPECIES: elongation factor P [Bacteria]	gi|446549158		21 kDa		0.21	0.9	[]	unknown	29	25	22	19	35	7
137	TRUE	Empty	DNA topoisomerase 1 [Staphylococcus aureus]	gi|446697442		79 kDa		0.39	1.3	[]	unknown	18	23	18	11	10	0
138	TRUE	Empty	RecName: Full=CTP synthase; AltName: Full=CTP synthetase; AltName: Full=UTP--ammonia ligase	gi|119391183		60 kDa		0.12	0.8	[]	unknown	44	37	37	32	24	8
139	TRUE	Empty	hypothetical protein SAOUHSC_01974 [Staphylococcus aureus subsp. aureus NCTC 8325]	gi|88195665		114 kDa	TRUE	0.19	0.8	[]	unknown	16	12	7	4	1	0
140	TRUE	Empty	RecName: Full=Adenylosuccinate lyase; Short=ASL; AltName: Full=Adenylosuccinase; Short=ASase	gi|117940103		50 kDa		0.48	1.1	[]	unknown	47	51	31	48	33	9
141	TRUE	Empty	RecName: Full=30S ribosomal protein S5	gi|122538863		18 kDa		0.29	1	[]	unknown	52	51	42	36	27	8
142	TRUE	Empty	RecName: Full=50S ribosomal protein L16	gi|115502796		16 kDa		0.3	0.9	[]	unknown	22	20	16	15	14	0
143	TRUE	Empty	MULTISPECIES: Fe-S cluster assembly ATPase SufC [Bacteria]	gi|446090990		28 kDa		0.42	1	[]	unknown	42	44	40	24	11	2
144	TRUE	Empty	RecName: Full=UPF0051 protein SAOUHSC_00851	gi|122539931		53 kDa		0.41	1	[]	unknown	45	47	46	33	29	6
145	TRUE	Empty	RecName: Full=Probable manganese-dependent inorganic pyrophosphatase; AltName: Full=Pyrophosphate phospho-hydrolase; Short=PPase	gi|122539107		34 kDa		0.53	1.1	[]	unknown	54	60	52	26	19	11
146	TRUE	Empty	RecName: Full=Bifunctional purine biosynthesis protein PurH; Includes: RecName: Full=Phosphoribosylaminoimidazolecarboxamide formyltransferase; AltName: Full=AICAR transformylase; Includes: RecName: Full=IMP cyclohydrolase; AltName: Full=ATIC; AltName: Full=IMP synthase; AltName: Full=Inosinicase	gi|122539822		54 kDa		0.24	1	[]	unknown	65	63	47	51	34	11
147	TRUE	Empty	RecName: Full=Transcriptional regulator SarA; AltName: Full=Staphylococcal accessory regulator A	gi|114152150		15 kDa		0.5	1.1	[]	unknown	43	47	48	41	35	13
148	TRUE	Empty	S1 RNA-binding domain-containing protein [Staphylococcus aureus subsp. aureus NCTC 8325]	gi|88195963		81 kDa	TRUE	0.51	1.1	[]	unknown	42	46	45	21	16	4
149	TRUE	Empty	MULTISPECIES: purine nucleoside phosphorylase [Bacteria]	gi|446082449		26 kDa		0.55	1.1	[]	unknown	25	28	31	23	14	9
150	TRUE	Empty	RecName: Full=50S ribosomal protein L11	gi|60393643		15 kDa		0.21	1.4	[]	unknown	31	43	36	35	32	16
151	TRUE	Empty	RecName: Full=Ribonuclease J 2; Short=RNase J2	gi|147742895		63 kDa	TRUE	0.52	1.2	[]	unknown	19	22	28	14	14	3
152	TRUE	Empty	RecName: Full=DNA gyrase subunit A	gi|114149316		99 kDa		0.12	0.8	[]	unknown	39	32	34	24	14	2
153	TRUE	Empty	Chain N, Crystal Structure Of Clpp From Staphylococcus Aureus In The Active, Extended Conformation	gi|374977815 (+1)		23 kDa		0.13	1.5	[]	unknown	27	41	50	20	21	9
154	TRUE	Empty	RecName: Full=UPF0753 protein SAOUHSC_00413	gi|122540182		103 kDa		1	INF	[]	unknown	0	0	3	0	0	0
155	TRUE	Empty	MULTISPECIES: GTP-binding protein [Staphylococcus]	gi|446104799		69 kDa		0.32	1	[]	unknown	35	34	28	24	18	9
156	TRUE	Empty	RecName: Full=ATP-dependent Clp protease ATP-binding subunit ClpX	gi|122539337		46 kDa		0.51	1.1	[]	unknown	27	31	42	17	16	3
157	TRUE	Empty	MULTISPECIES: acetyl-CoA synthetase [Bacteria]	gi|447095084		60 kDa		0.39	1	[]	unknown	52	54	46	24	28	12
158	TRUE	Empty	RecName: Full=NADH dehydrogenase-like protein SAOUHSC_00878	gi|122539909		44 kDa		0.00067	0.6	[]	unknown	85	54	43	45	34	5
159	TRUE	Empty	RecName: Full=ATP-dependent helicase/nuclease subunit A; AltName: Full=ATP-dependent helicase/nuclease AddA	gi|122539894		141 kDa		0.38	0.9	[]	unknown	16	15	11	5	0	0
160	TRUE	Empty	glutamate synthase large subunit [Staphylococcus aureus subsp. aureus NCTC 8325]	gi|88194226		166 kDa		0.04	2.6	[]	unknown	7	18	1	8	7	2
161	TRUE	Empty	RecName: Full=Bifunctional protein FolD; Includes: RecName: Full=Methylenetetrahydrofolate dehydrogenase; Includes: RecName: Full=Methenyltetrahydrofolate cyclohydrolase	gi|119370053		31 kDa		0.21	1	[]	unknown	65	62	43	44	46	13
162	TRUE	Empty	RecName: Full=ATP-dependent DNA helicase PcrA	gi|110282982		84 kDa		0.4	1.3	[]	unknown	19	24	17	9	0	0
163	TRUE	Empty	MULTISPECIES: Fe-S cluster assembly protein SufD [Bacteria]	gi|446127717		49 kDa		0.33	1.3	[]	unknown	22	29	30	19	19	9
164	TRUE	Empty	RecName: Full=Phosphoglucosamine mutase	gi|84029255		49 kDa		0.1	0.8	[]	unknown	50	42	56	33	33	13
165	TRUE	Empty	1,4-dihydroxy-2-naphthoyl-CoA synthase [Staphylococcus aureus]	gi|446107092		30 kDa		0.49	1.1	[]	unknown	41	47	51	29	21	15
166	TRUE	Empty	SMC domain-containing protein [Staphylococcus aureus subsp. aureus NCTC 8325]	gi|88194941		137 kDa		0.13	0.8	[]	unknown	26	20	15	10	2	0
167	TRUE	Empty	UvrABC system protein A [Staphylococcus aureus]	gi|446585335		105 kDa		0.54	1.1	[]	unknown	27	30	21	17	10	0
168	TRUE	Empty	hypothetical protein SAOUHSC_01857 [Staphylococcus aureus subsp. aureus NCTC 8325]	gi|88195555		145 kDa		0.31	0.9	[]	unknown	16	14	9	8	4	0
169	TRUE	Empty	MULTISPECIES: DEAD/DEAH box family ATP-dependent RNA helicase [Bacteria]	gi|447101686		57 kDa		0.18	1.4	[]	unknown	43	59	49	26	16	2
170	TRUE	Empty	hypothetical protein SAOUHSC_02447 [Staphylococcus aureus subsp. aureus NCTC 8325]	gi|88196099		36 kDa		0.41	1.2	[]	unknown	26	32	34	13	12	6
171	TRUE	Empty	hypothetical protein SAOUHSC_01854 [Staphylococcus aureus subsp. aureus NCTC 8325]	gi|88195552		55 kDa		0.27	0.9	[]	unknown	39	37	42	24	9	0
172	TRUE	Empty	FMN oxidoreductase [Staphylococcus aureus subsp. aureus NCTC 8325]	gi|88194650		42 kDa		0.3	1.3	[]	unknown	46	58	64	9	5	1
173	TRUE	Empty	RecName: Full=Ribosome-recycling factor; Short=RRF; AltName: Full=Ribosome-releasing factor	gi|122539692		20 kDa		0.28	1.3	[]	unknown	31	41	42	25	33	16
174	TRUE	Empty	MULTISPECIES: adenylosuccinate synthetase [Bacteria]	gi|446017472		48 kDa		0.14	0.9	[]	unknown	64	58	28	50	51	14
175	TRUE	Empty	penicillin-binding protein 2 [Staphylococcus aureus]	gi|446060496		80 kDa		0.12	0.8	[]	unknown	38	31	29	18	14	0
176	TRUE	Empty	RecName: Full=Copper chaperone CopZ	gi|122538627		7 kDa		< 0.00010	7.3	1mM Cu high, TSB low	unknown	26	190	180	3	31	16
177	TRUE	Empty	phenylalanine--tRNA ligase subunit beta [Staphylococcus aureus]	gi|446831726		89 kDa		0.46	1.2	[]	unknown	43	50	48	30	26	13
178	TRUE	Empty	NADP-dependent malic enzyme [Staphylococcus aureus subsp. aureus NCTC 8325]	gi|88195510		44 kDa		0.52	1.1	[]	unknown	28	32	34	26	22	12
179	TRUE	Empty	RecName: Full=30S ribosomal protein S8	gi|122538862		15 kDa		0.07	0.7	[]	unknown	23	15	19	14	7	2
180	TRUE	Empty	MULTISPECIES: UDP-N-acetylglucosamine 1-carboxyvinyltransferase 1 [Bacteria]	gi|446280151		45 kDa		0.2	0.9	[]	unknown	46	42	33	25	22	8
181	TRUE	Empty	type-1 restriction enzyme R protein [Staphylococcus aureus]	gi|446253492		109 kDa		0.041	3.2	[]	unknown	4	13	7	2	3	0
182	TRUE	Empty	MULTISPECIES: transcription termination factor NusA [Bacteria]	gi|446019607		44 kDa		0.46	1.1	[]	unknown	33	35	30	30	25	15
183	TRUE	Empty	MULTISPECIES: phosphoribosylformylglycinamidine synthase [Bacteria]	gi|446771094		10 kDa		0.00012	1.9	1mM Cu high, TSB low	unknown	77	144	50	57	71	9
184	TRUE	Empty	MULTISPECIES: glycine dehydrogenase (decarboxylating) [Bacteria]	gi|446124334		55 kDa		0.39	1.2	[]	unknown	30	37	37	29	24	5
185	TRUE	Empty	MULTISPECIES: D-alanine aminotransferase [Bacteria]	gi|446333230		32 kDa		0.43	1	[]	unknown	41	43	50	47	39	29
186	TRUE	Empty	phosphoribosylamine--glycine ligase [Staphylococcus aureus subsp. aureus NCTC 8325]	gi|88194772		46 kDa		0.2	0.9	[]	unknown	44	40	33	51	54	33
187	TRUE	Empty	MULTISPECIES: peptidase M24 [Bacteria]	gi|446009252		39 kDa		0.24	1.4	[]	unknown	31	42	46	27	17	12
188	TRUE	Empty	RecName: Full=Probable glycine dehydrogenase (decarboxylating) subunit 1; AltName: Full=Glycine cleavage system P-protein subunit 1; AltName: Full=Glycine decarboxylase subunit 1; AltName: Full=Glycine dehydrogenase (aminomethyl-transferring) subunit 1	gi|122539428		50 kDa		0.42	1.2	[]	unknown	34	41	38	17	19	5
189	TRUE	Empty	glutamate-1-semialdehyde 2,1-aminomutase [Staphylococcus aureus]	gi|447193612		46 kDa		0.43	1	[]	unknown	40	42	52	32	20	8
190	TRUE	Empty	bifunctional acetaldehyde-CoA/alcohol dehydrogenase [Staphylococcus aureus subsp. aureus NCTC 8325]	gi|88193926		95 kDa		0.15	0.9	[]	unknown	51	45	5	23	9	0
191	TRUE	Empty	RecName: Full=30S ribosomal protein S17	gi|118573211		10 kDa		0.32	0.8	[]	unknown	13	11	11	16	20	0
192	TRUE	Empty	RecName: Full=Asparagine--tRNA ligase; AltName: Full=Asparaginyl-tRNA synthetase; Short=AsnRS	gi|123291797		49 kDa		0.42	1.2	[]	unknown	35	42	31	21	16	6
193	TRUE	Empty	RecName: Full=DNA polymerase III PolC-type; Short=PolIII	gi|110808208		162 kDa	TRUE	0.13	2.5	[]	unknown	4	10	2	3	0	0
194	TRUE	Empty	RecName: Full=ATP-dependent 6-phosphofructokinase; Short=ATP-PFK; Short=Phosphofructokinase; AltName: Full=Phosphohexokinase	gi|678000067		35 kDa		0.39	1	[]	unknown	39	40	26	26	33	7
195	TRUE	Empty	MULTISPECIES: hydrolase [Bacteria]	gi|446371050		31 kDa		0.51	1.1	[]	unknown	41	45	45	22	16	2
196	TRUE	Empty	ABC transporter ATP-binding protein [Staphylococcus aureus subsp. aureus NCTC 8325]	gi|88195119		60 kDa		0.36	1	[]	unknown	36	36	29	28	20	7
197	TRUE	Empty	RecName: Full=Alcohol dehydrogenase; Short=ADH	gi|122540071		36 kDa		0.38	1.1	[]	unknown	78	82	21	24	14	0
198	TRUE	Empty	MULTISPECIES: ATP synthase subunit alpha [Bacteria]	gi|446897625		55 kDa		0.2	0.9	[]	unknown	42	38	33	32	31	11
199	TRUE	Empty	RecName: Full=Putative 2-hydroxyacid dehydrogenase SAOUHSC_02577	gi|122538828		35 kDa		0.31	1.3	[]	unknown	31	40	36	28	22	5
200	TRUE	Empty	RecName: Full=Cysteine--tRNA ligase; AltName: Full=Cysteinyl-tRNA synthetase; Short=CysRS	gi|123291881		54 kDa		0.28	1.3	[]	unknown	26	35	31	16	13	1
201	TRUE	Empty	RecName: Full=50S ribosomal protein L17	gi|122538867		14 kDa		0.51	1.1	[]	unknown	32	35	38	23	22	18
202	TRUE	Empty	MULTISPECIES: phosphopentomutase [Bacteria]	gi|446119951		44 kDa		0.46	1.2	[]	unknown	35	41	44	25	19	9
203	TRUE	Empty	protein RecA [Staphylococcus aureus]	gi|446290311		38 kDa	TRUE	0.24	1.3	[]	unknown	36	48	39	27	19	9
204	TRUE	Empty	MULTISPECIES: transcriptional regulator [Bacteria]	gi|447206188		17 kDa		0.25	0.9	[]	unknown	28	25	25	15	9	2
205	TRUE	Empty	MULTISPECIES: ribonucleotide-diphosphate reductase subunit beta [Bacteria]	gi|446484644		38 kDa		0.31	1.3	[]	unknown	31	40	45	19	19	9
206	TRUE	Empty	MULTISPECIES: succinate dehydrogenase flavoprotein subunit [Bacteria]	gi|446741022		66 kDa		0.32	0.9	[]	unknown	14	12	9	4	6	2
207	TRUE	Empty	RecName: Full=Elongation factor 4; Short=EF-4; AltName: Full=Ribosomal back-translocase LepA	gi|119371400		68 kDa		0.41	1	[]	unknown	22	22	23	14	8	0
208	TRUE	Empty	MULTISPECIES: 2-oxoglutarate dehydrogenase E1 component [Bacteria]	gi|446102811		105 kDa		0.41	1	[]	unknown	24	24	20	19	13	0
209	TRUE	Empty	hypothetical protein SAOUHSC_02790 [Staphylococcus aureus subsp. aureus NCTC 8325]	gi|88196426		110 kDa		0.37	1.4	[]	unknown	10	14	10	2	1	0
210	TRUE	Empty	RecName: Full=Tyrosine--tRNA ligase; AltName: Full=Tyrosyl-tRNA synthetase; Short=TyrRS	gi|123407035		48 kDa		0.19	1.4	[]	unknown	28	40	37	25	20	6
211	TRUE	Empty	RecName: Full=Serine hydroxymethyltransferase; Short=SHMT; Short=Serine methylase	gi|122538954		45 kDa		0.014	0.6	[]	unknown	39	24	30	37	27	8
212	TRUE	Empty	glutamate-1-semialdehyde 2,1-aminomutase [Staphylococcus aureus]	gi|446934342		47 kDa	TRUE	0.52	1.1	[]	unknown	28	32	37	20	19	5
213	TRUE	Empty	RecName: Full=Methylenetetrahydrofolate--tRNA-(uracil-5-)-methyltransferase TrmFO; AltName: Full=Folate-dependent tRNA (uracil-5-)-methyltransferase; AltName: Full=Folate-dependent tRNA(M-5-U54)-methyltransferase	gi|122539696		48 kDa		0.53	1.1	[]	unknown	21	23	24	12	4	0
214	TRUE	Empty	RecName: Full=Glucose-6-phosphate isomerase; Short=GPI; AltName: Full=Phosphoglucose isomerase; Short=PGI; AltName: Full=Phosphohexose isomerase; Short=PHI	gi|116248076		50 kDa		0.16	1.5	[]	unknown	28	41	29	20	11	3
215	TRUE	Empty	MULTISPECIES: general stress protein [Bacteria]	gi|445993011		17 kDa		0.21	1.5	[]	unknown	15	23	35	14	11	13
216	TRUE	Empty	MULTISPECIES: GTP pyrophosphokinase [Bacteria]	gi|446981327		84 kDa		0.25	0.8	[]	unknown	14	11	7	3	1	0
217	TRUE	Empty	hypothetical protein SAOUHSC_01383 [Staphylococcus aureus subsp. aureus NCTC 8325]	gi|88195110		69 kDa		0.35	1	[]	unknown	25	24	40	18	24	12
218	TRUE	Empty	deoxyribose-phosphate aldolase 2 [Staphylococcus aureus]	gi|447006055		23 kDa	TRUE	0.0038	0.6	[]	unknown	54	33	38	24	20	10
219	TRUE	Empty	globin domain-containing protein [Staphylococcus aureus subsp. aureus NCTC 8325]	gi|88194014		43 kDa		0.44	1.1	[]	unknown	37	39	33	7	3	0
220	TRUE	Empty	RecName: Full=Uncharacterized protein SAOUHSC_02143	gi|122539104		39 kDa		0.39	1	[]	unknown	29	29	37	15	11	7
221	TRUE	Empty	hypothetical protein SAOUHSC_00486 [Staphylococcus aureus subsp. aureus NCTC 8325]	gi|88194271		78 kDa		0.46	1	[]	unknown	23	24	24	12	7	0
222	TRUE	Empty	RecName: Full=DNA ligase; AltName: Full=Polydeoxyribonucleotide synthase [NAD(+)]	gi|123098079		75 kDa		0.35	1	[]	unknown	26	25	22	15	15	0
223	TRUE	Empty	RecName: Full=DNA topoisomerase 3; AltName: Full=DNA topoisomerase III	gi|122538856		82 kDa		0.31	0.9	[]	unknown	16	14	15	13	7	0
224	TRUE	Empty	glycosyltransferase family 1 [Staphylococcus aureus]	gi|446641838		57 kDa	TRUE	0.4	2	[]	unknown	2	4	4	1	4	0
225	TRUE	Empty	MULTISPECIES: succinyl-CoA ligase subunit alpha [Staphylococcus]	gi|446032398		32 kDa		0.31	1	[]	unknown	41	40	34	37	33	5
226	TRUE	Empty	excinuclease ABC subunit B [Staphylococcus aureus]	gi|446151398		77 kDa	TRUE	0.54	1	[]	unknown	6	6	7	0	0	0
227	TRUE	Empty	bifunctional 3-deoxy-7-phosphoheptulonate synthase/chorismate mutase [Staphylococcus aureus subsp. aureus NCTC 8325]	gi|88195550		41 kDa		0.25	1.4	[]	unknown	23	32	32	11	10	4
228	TRUE	Empty	MULTISPECIES: GTP cyclohydrolase FolE2 [Bacteria]	gi|446056377		33 kDa		0.42	1	[]	unknown	20	20	21	9	2	1
229	TRUE	Empty	nitrate reductase subunit alpha [Staphylococcus aureus]	gi|446436536		140 kDa		0.32	0.8	[]	unknown	8	6	0	0	0	0
230	TRUE	Empty	MULTISPECIES: dihydroorotase [Bacteria]	gi|446689682		46 kDa		0.48	1.1	[]	unknown	38	41	40	20	17	16
231	TRUE	Empty	MULTISPECIES: 50S ribosomal protein L19 [Staphylococcus]	gi|446103549		13 kDa		0.37	0.9	[]	unknown	19	18	18	11	9	3
232	TRUE	Empty	ABC transporter substrate-binding protein [Staphylococcus aureus]	gi|446660309		35 kDa		0.45	1	[]	unknown	26	27	30	11	29	11
233	TRUE	Empty	RecName: Full=DNA mismatch repair protein MutS	gi|110810486		100 kDa	TRUE	0.42	1.3	[]	unknown	15	19	8	3	1	0
234	TRUE	Empty	MULTISPECIES: Ornithine aminotransferase 2 [Bacteria]	gi|446089459		43 kDa		0.51	1.1	[]	unknown	24	26	16	22	20	7
235	TRUE	Empty	hypothetical protein SAOUHSC_00049 [Staphylococcus aureus subsp. aureus NCTC 8325]	gi|88193869		122 kDa		0.27	0.3	[]	unknown	3	1	2	0	0	0
236	TRUE	Empty	RecName: Full=Cell division protein FtsA	gi|150421554		53 kDa		0.24	0.9	[]	unknown	42	39	36	28	21	4
237	TRUE	Empty	glucose-specific phosphotransferase enzyme IIA component [Staphylococcus aureus]	gi|446395797		18 kDa		0.16	1.5	[]	unknown	24	36	34	17	15	9
238	TRUE	Empty	MULTISPECIES: translation initiation factor IF-3 [Bacteria]	gi|487706930		20 kDa	TRUE	0.31	0.9	[]	unknown	21	19	19	15	22	5
239	TRUE	Empty	hypothetical protein SAOUHSC_01455 [Staphylococcus aureus subsp. aureus NCTC 8325]	gi|88195174		133 kDa		0.53	1.2	[]	unknown	11	13	12	5	1	0
240	TRUE	Empty	MULTISPECIES: pyruvate oxidase [Bacteria]	gi|446985402		64 kDa		0.19	1.4	[]	unknown	28	40	34	6	6	1
241	TRUE	Empty	transcription-repair-coupling factor [Staphylococcus aureus]	gi|446076373		134 kDa		0.37	1.4	[]	unknown	10	14	10	0	0	0
242	TRUE	Empty	MULTISPECIES: malonyl CoA-ACP transacylase [Bacteria]	gi|445969493		34 kDa		0.52	1.1	[]	unknown	28	32	28	23	23	10
243	TRUE	Empty	MULTISPECIES: signal recognition particle protein [Bacteria]	gi|446786223		51 kDa		0.52	1.2	[]	unknown	10	12	12	9	4	0
244	TRUE	Empty	ribonuclease R [Staphylococcus aureus subsp. aureus NCTC 8325]	gi|88194563		90 kDa		0.52	1.1	[]	unknown	23	25	19	12	9	2
245	TRUE	Empty	MULTISPECIES: catabolite control protein A [Bacteria]	gi|446141211		36 kDa		0.53	1.1	[]	unknown	37	41	37	19	14	2
246	TRUE	Empty	RecName: Full=Lipid II:glycine glycyltransferase; AltName: Full=Factor essential for expression of methicillin resistance X	gi|110808232		49 kDa	TRUE	0.37	1.3	[]	unknown	16	21	20	11	10	3
247	TRUE	Empty	RecName: Full=Lipoteichoic acid synthase; Contains: RecName: Full=Glycerol phosphate lipoteichoic acid synthase; Short=LTA synthase; AltName: Full=Polyglycerol phosphate synthase; Contains: RecName: Full=Processed glycerol phosphate lipoteichoic acid synthase	gi|122540018		74 kDa		0.52	1.1	[]	unknown	23	25	22	10	11	11
248	TRUE	Empty	RecName: Full=Serine protease HtrA-like	gi|116248101		86 kDa	TRUE	0.29	0.5	[]	unknown	4	2	2	1	0	0
249	TRUE	Empty	hypothetical protein SAOUHSC_02121 [Staphylococcus aureus subsp. aureus NCTC 8325]	gi|88195802		45 kDa		0.57	1.2	[]	unknown	5	6	5	0	1	0
250	TRUE	Empty	RecName: Full=Nucleoid-associated protein SAOUHSC_00444	gi|122540161		12 kDa		0.15	0.2	[]	unknown	4	1	3	2	1	0
251	TRUE	Empty	RecName: Full=ATP-dependent helicase/deoxyribonuclease subunit B; AltName: Full=ATP-dependent helicase/nuclease AddB	gi|122539895		135 kDa		0.41	0.9	[]	unknown	9	8	9	3	3	1
252	TRUE	Empty	hypothetical protein SAOUHSC_01583 [Staphylococcus aureus subsp. aureus NCTC 8325]	gi|88195294		77 kDa	TRUE	0.56	1.3	[]	unknown	3	4	3	0	0	0
253	TRUE	Empty	RecName: Full=Putative universal stress protein SAOUHSC_01819	gi|123003452		18 kDa		0.061	0.8	[]	unknown	57	46	35	23	26	11
254	TRUE	Empty	MULTISPECIES: transcription elongation factor GreA [Bacteria]	gi|446353457		18 kDa		0.46	1.2	[]	unknown	26	31	30	22	17	11
255	TRUE	Empty	RecName: Full=Sensor protein SrrB; AltName: Full=Staphylococcal respiratory response protein B	gi|123003464		66 kDa		0.72	1	[]	unknown	1	1	0	0	0	0
256	TRUE	Empty	MULTISPECIES: uracil phosphoribosyltransferase [Bacteria]	gi|445970857		23 kDa		0.077	0.8	[]	unknown	39	30	27	24	20	6
257	TRUE	Empty	hypothetical protein SAOUHSC_00258 [Staphylococcus aureus subsp. aureus NCTC 8325]	gi|88194064		115 kDa		0.53	INF	[]	unknown	0	1	3	0	0	0
258	TRUE	Empty	MULTISPECIES: 2-C-methyl-D-erythritol 4-phosphate cytidylyltransferase [Bacteria]	gi|446795230		27 kDa	TRUE	0.48	1.1	[]	unknown	29	31	33	21	18	3
259	TRUE	Empty	hypothetical protein SAOUHSC_02158 [Staphylococcus aureus subsp. aureus NCTC 8325]	gi|88195838		48 kDa		0.17	0.8	[]	unknown	31	26	28	17	10	2
260	TRUE	Empty	MULTISPECIES: pyridoxal kinase [Bacteria]	gi|447108206		30 kDa		0.21	1.4	[]	unknown	23	33	26	15	11	3
261	TRUE	Empty	MULTISPECIES: heat-shock protein Hsp33 [Bacteria]	gi|446070750		32 kDa		0.51	1.1	[]	unknown	25	27	23	7	1	1
262	TRUE	Empty	MULTISPECIES: UDP-N-acetylglucosamine 1-carboxyvinyltransferase 2 [Bacteria]	gi|445968747		45 kDa		0.25	0.9	[]	unknown	32	29	30	16	11	3
263	TRUE	Empty	RecName: Full=DNA topoisomerase 4 subunit A; AltName: Full=Topoisomerase IV subunit A	gi|114152111-DECOY		?		0.53	INF	[]	unknown	0	1	1	0	0	0
264	TRUE	Empty	RecName: Full=Septation ring formation regulator EzrA	gi|123003451		66 kDa	TRUE	0.051	0.7	[]	unknown	32	22	19	7	5	0
265	TRUE	Empty	RecName: Full=Putative formate dehydrogenase SAOUHSC_02582	gi|123406992		111 kDa		0.00041	0.4	1mM Cu low, TSB high	unknown	37	15	13	10	4	0
266	TRUE	Empty	signal recognition particle-docking protein FtsY [Staphylococcus aureus subsp. aureus NCTC 8325]	gi|88194942		47 kDa		0.47	1.1	[]	unknown	31	33	30	16	11	1
267	TRUE	Empty	MULTISPECIES: 2-amino-3-ketobutyrate CoA ligase [Bacteria]	gi|446172969		43 kDa		0.25	0.9	[]	unknown	30	27	25	20	21	13
268	TRUE	Empty	RecName: Full=3-methyl-2-oxobutanoate hydroxymethyltransferase; AltName: Full=Ketopantoate hydroxymethyltransferase; Short=KPHMT	gi|158564267		29 kDa		0.38	1.2	[]	unknown	28	35	29	13	9	2
269	TRUE	Empty	RecName: Full=Acetyl-coenzyme A carboxylase carboxyl transferase subunit beta; Short=ACCase subunit beta; Short=Acetyl-CoA carboxylase carboxyltransferase subunit beta	gi|122539314		32 kDa		0.36	0.9	[]	unknown	20	19	22	18	11	2
270	TRUE	Empty	RecName: Full=Protein GrpE; AltName: Full=HSP-70 cofactor	gi|123291786		24 kDa		0.43	1.2	[]	unknown	36	43	42	27	23	11
271	TRUE	Empty	MULTISPECIES: cysteine desulfurase [Bacteria]	gi|446730415		46 kDa	TRUE	0.3	0.9	[]	unknown	26	24	23	18	12	1
272	TRUE	Empty	hypothetical protein SAOUHSC_01931 [Staphylococcus aureus subsp. aureus NCTC 8325]	gi|88195626		163 kDa		0.47	0	[]	unknown	1	0	0	0	0	0
273	TRUE	Empty	MULTISPECIES: lactate dehydrogenase [Bacteria]	gi|446083681		37 kDa		0.39	0.9	[]	unknown	13	12	18	4	8	2
274	TRUE	Empty	RecName: Full=D-alanine--D-alanine ligase; AltName: Full=D-Ala-D-Ala ligase; AltName: Full=D-alanylalanine synthetase	gi|122538976		40 kDa		0.44	1.2	[]	unknown	31	37	31	13	18	0
275	TRUE	Empty	hypothetical protein SAOUHSC_00228 [Staphylococcus aureus subsp. aureus NCTC 8325]	gi|88194035		66 kDa		0.19	0.8	[]	unknown	16	12	9	14	17	4
276	TRUE	Empty	RecName: Full=Glycine cleavage system H protein; AltName: Full=Octanoyl/lipoyl carrier protein	gi|122539943		14 kDa		0.19	1.5	[]	unknown	20	30	38	25	25	12
277	TRUE	Empty	RecName: Full=Delta-aminolevulinic acid dehydratase; Short=ALAD; Short=ALADH; AltName: Full=Porphobilinogen synthase	gi|110808549		37 kDa		0.054	0.7	[]	unknown	34	24	32	11	2	2
278	TRUE	Empty	RecName: Full=30S ribosomal protein S15	gi|118597468		11 kDa		0.22	0	[]	unknown	2	0	24	64	28	9
279	TRUE	Empty	assimilatory nitrite reductase [NAD(P)H] large subunit [Staphylococcus aureus subsp. aureus NCTC 8325]	gi|88196324		89 kDa		0.11	0.8	[]	unknown	32	25	1	10	2	0
280	TRUE	Empty	RecName: Full=Nuclease SbcCD subunit C	gi|190360283 (+1)		117 kDa		0.43	0.8	[]	unknown	5	4	2	2	0	0
281	TRUE	Empty	MULTISPECIES: ribose-phosphate pyrophosphokinase [Bacteria]	gi|446856518		35 kDa		0.32	1.3	[]	unknown	38	48	37	27	15	6
282	TRUE	Empty	acetyl-CoA acyltransferase [Staphylococcus aureus]	gi|446121215		42 kDa		0.29	0.9	[]	unknown	32	30	25	16	9	3
283	TRUE	Empty	RecName: Full=L-lactate dehydrogenase 2; Short=L-LDH 2	gi|123003514		34 kDa		0.44	1.2	[]	unknown	31	37	40	18	24	9
284	TRUE	Empty	hypothetical protein SAOUHSC_01266 [Staphylococcus aureus subsp. aureus NCTC 8325]	gi|88194999		65 kDa		0.38	1.5	[]	unknown	6	9	7	4	1	0
285	TRUE	Empty	MULTISPECIES: tRNA-binding protein [Bacteria]	gi|446971112		22 kDa		0.34	1	[]	unknown	30	29	29	27	18	5
286	TRUE	Empty	RecName: Full=tRNA uridine 5-carboxymethylaminomethyl modification enzyme MnmG; AltName: Full=Glucose-inhibited division protein A	gi|205831560		70 kDa		0.25	0.8	[]	unknown	19	16	19	10	4	0
287	TRUE	Empty	MULTISPECIES: penicillin-binding protein 3 [Bacteria]	gi|446842516		77 kDa		0.52	1.1	[]	unknown	15	16	7	3	3	0
288	TRUE	Empty	RecName: Full=UDP-N-acetylmuramoyl-L-alanyl-D-glutamate--L-lysine ligase; AltName: Full=L-lysine-adding enzyme; AltName: Full=UDP-MurNAc-L-Ala-D-Glu:L-Lys ligase; AltName: Full=UDP-MurNAc-tripeptide synthetase; AltName: Full=UDP-N-acetylmuramyl-tripeptide synthetase	gi|122539862		54 kDa		0.17	0.9	[]	unknown	35	30	21	17	17	5
289	TRUE	Empty	RecName: Full=ATP-dependent protease ATPase subunit HslU; AltName: Full=Unfoldase HslU	gi|123003474		52 kDa		0.37	1	[]	unknown	35	35	25	27	16	6
290	TRUE	Empty	RecName: Full=GTPase Obg; AltName: Full=GTP-binding protein Obg	gi|122539355		47 kDa		0.25	1.4	[]	unknown	18	26	23	17	14	4
291	TRUE	Empty	MULTISPECIES: stage V sporulation protein G [Bacteria]	gi|446791743		11 kDa		0.072	0.7	[]	unknown	24	16	24	22	16	7
292	TRUE	Empty	transcription-repair-coupling factor [Staphylococcus aureus]	gi|446076373-DECOY		?		1	INF	[]	unknown	0	0	0	0	0	0
293	TRUE	Empty	type I restriction-modification system subunit M [Staphylococcus aureus subsp. aureus NCTC 8325]	gi|88195628		67 kDa	TRUE	0.15	1.7	[]	unknown	13	22	28	9	15	1
294	TRUE	Empty	penicillin-binding protein [Staphylococcus aureus]	gi|447041407		83 kDa		0.5	1	[]	unknown	9	9	9	1	0	0
295	TRUE	Empty	RecName: Full=GTP-sensing transcriptional pleiotropic repressor CodY	gi|123003473		29 kDa		0.49	1.2	[]	unknown	32	37	27	9	10	4
296	TRUE	Empty	MULTISPECIES: 50S ribosomal protein L25 [Bacteria]	gi|446079795		24 kDa		0.21	1.4	[]	unknown	31	43	36	34	27	21
297	TRUE	Empty	RecName: Full=Phosphoribosylformylglycinamidine synthase subunit PurQ; Short=FGAM synthase; AltName: Full=Formylglycinamide ribonucleotide amidotransferase subunit I; Short=FGAR amidotransferase I; Short=FGAR-AT I; AltName: Full=Glutaminase PurQ; AltName: Full=Phosphoribosylformylglycinamidine synthase subunit I	gi|116255962		25 kDa		0.48	1.1	[]	unknown	29	31	21	23	20	9
298	TRUE	Empty	MULTISPECIES: zinc protease [Bacteria]	gi|446587420		50 kDa		0.3	1.5	[]	unknown	10	15	15	8	11	8
299	TRUE	Empty	RecName: Full=NH(3)-dependent NAD(+) synthetase	gi|122540519		31 kDa		0.48	1.2	[]	unknown	30	35	41	19	14	3
300	TRUE	Empty	RecName: Full=50S ribosomal protein L30	gi|60393663		7 kDa		0.12	0.8	[]	unknown	37	30	29	16	15	5
301	TRUE	Empty	MULTISPECIES: hypothetical protein [Bacteria]	gi|446546557		61 kDa		0.25	0.9	[]	unknown	27	24	23	21	23	3
302	TRUE	Empty	indolepyruvate decarboxylase [Staphylococcus aureus]	gi|446736299		61 kDa		0.48	1.1	[]	unknown	29	31	37	19	15	9
303	TRUE	Empty	hypothetical protein SAOUHSC_02574 [Staphylococcus aureus subsp. aureus NCTC 8325]	gi|88196218		41 kDa		0.25	0.9	[]	unknown	31	28	26	28	23	5
304	TRUE	Empty	MULTISPECIES: peptide deformylase [Bacteria]	gi|446879780		21 kDa		0.32	1.5	[]	unknown	11	16	24	12	9	7
305	TRUE	Empty	MULTISPECIES: peptidase [Bacteria]	gi|446692374		21 kDa		0.075	0.7	[]	unknown	25	17	15	14	12	5
306	TRUE	Empty	MULTISPECIES: hypothetical protein [Bacteria]	gi|446234914		66 kDa		0.49	1.2	[]	unknown	23	27	24	8	4	0
307	TRUE	Empty	MULTISPECIES: transcription termination/antitermination protein NusG [Bacteria]	gi|447211046		21 kDa		0.55	1.1	[]	unknown	25	28	28	16	13	2
308	TRUE	Empty	MULTISPECIES: transcriptional regulator [Bacteria]	gi|445958221		14 kDa		0.42	1.2	[]	unknown	34	41	31	24	20	12
309	TRUE	Empty	RecName: Full=Hyaluronate lyase; AltName: Full=Hyaluronidase; Short=HYase; Flags: Precursor	gi|3913884		92 kDa		1	INF	[]	unknown	0	0	1	0	0	0
310	TRUE	Empty	RecName: Full=30S ribosomal protein S11	gi|123003433		14 kDa		0.21	1.4	[]	unknown	26	37	34	24	21	0
311	TRUE	Empty	MULTISPECIES: S-adenosylmethionine synthase [Bacteria]	gi|446856566		44 kDa		0.5	1.1	[]	unknown	26	28	24	11	10	2
312	TRUE	Empty	acetyl-CoA carboxylase biotin carboxylase [Staphylococcus aureus]	gi|446679266		50 kDa		0.26	1.5	[]	unknown	11	17	10	11	9	0
313	TRUE	Empty	RecName: Full=Queuine tRNA-ribosyltransferase; AltName: Full=Guanine insertion enzyme; AltName: Full=tRNA-guanine transglycosylase	gi|123003456		43 kDa		0.25	0.8	[]	unknown	13	10	11	8	8	5
314	TRUE	Empty	MULTISPECIES: hypothetical protein [Bacteria]	gi|446414259		35 kDa		0.17	0.8	[]	unknown	33	28	19	20	22	5
315	TRUE	Empty	RecName: Full=Probable uridylyltransferase SAOUHSC_02423	gi|121957468		45 kDa		0.32	1.3	[]	unknown	26	34	26	24	19	7
316	TRUE	Empty	RecName: Full=Peptide chain release factor 1; Short=RF-1	gi|119361614		40 kDa		0.52	1.1	[]	unknown	15	16	12	11	11	1
317	TRUE	Empty	hypothetical protein SAOUHSC_00369 [Staphylococcus aureus subsp. aureus NCTC 8325]	gi|88194167		36 kDa		0.29	0.9	[]	unknown	29	27	24	14	6	3
318	TRUE	Empty	RecName: Full=50S ribosomal protein L14	gi|123098007		13 kDa		0.33	1	[]	unknown	34	33	29	23	12	1
319	TRUE	Empty	hypothetical protein SAOUHSC_02554 [Staphylococcus aureus subsp. aureus NCTC 8325]	gi|88196199		34 kDa		0.13	2.2	[]	unknown	6	13	7	2	6	2
320	TRUE	Empty	MULTISPECIES: UDP-glucose 4-epimerase [Bacteria]	gi|446645955		36 kDa		0.44	1	[]	unknown	16	16	12	11	8	0
321	TRUE	Empty	hypothetical protein SAOUHSC_01728 [Staphylococcus aureus subsp. aureus NCTC 8325]	gi|88195433		38 kDa		0.43	1.7	[]	unknown	3	5	6	0	0	0
322	TRUE	Empty	MULTISPECIES: GTP-binding protein [Bacteria]	gi|447141476		41 kDa		0.35	1	[]	unknown	25	24	30	19	8	3
323	TRUE	Empty	N5-carboxyaminoimidazole ribonucleotide synthase [Staphylococcus aureus]	gi|446933156		42 kDa		0.3	1.3	[]	unknown	40	51	19	26	16	2
324	TRUE	Empty	sun protein [Staphylococcus aureus subsp. aureus NCTC 8325]	gi|88194923		50 kDa		0.46	1	[]	unknown	13	13	11	10	5	1
325	TRUE	Empty	haloacid dehalogenase [Staphylococcus aureus]	gi|446293069		32 kDa		0.33	1.4	[]	unknown	17	23	18	11	4	0
326	TRUE	Empty	RecName: Full=Aspartyl/glutamyl-tRNA(Asn/Gln) amidotransferase subunit C; Short=Asp/Glu-ADT subunit C	gi|122539111		11 kDa		0.2	1.5	[]	unknown	17	26	19	18	15	8
327	TRUE	Empty	DNA repair protein RecN [Staphylococcus aureus subsp. aureus NCTC 8325]	gi|88195326		64 kDa		0.31	0.9	[]	unknown	15	13	9	9	3	0
328	TRUE	Empty	MULTISPECIES: universal stress protein UspA [Bacteria]	gi|446199747		15 kDa		0.2	1.4	[]	unknown	29	41	22	8	6	3
329	TRUE	Empty	DNA gyrase subunit B [Staphylococcus aureus subsp. aureus NCTC 8325]	gi|88193828		73 kDa		0.54	1.1	[]	unknown	13	14	11	6	5	0
330	TRUE	Empty	MULTISPECIES: 1-pyrroline-5-carboxylate dehydrogenase [Bacteria]	gi|446181837		57 kDa		0.31	0.9	[]	unknown	15	13	7	10	10	2
331	TRUE	Empty	RecName: Full=DEAD-box ATP-dependent RNA helicase CshB	gi|122539414		51 kDa		0.21	0.8	[]	unknown	23	19	19	11	6	0
332	TRUE	Empty	RecName: Full=Elastin-binding protein EbpS	gi|122539527		53 kDa		0.46	1.2	[]	unknown	12	15	18	11	13	1
333	TRUE	Empty	hypothetical protein SAOUHSC_01744 [Staphylococcus aureus subsp. aureus NCTC 8325]	gi|88195447		86 kDa		0.58	1.2	[]	unknown	6	7	2	1	0	0
334	TRUE	Empty	RecName: Full=DNA topoisomerase 4 subunit B; AltName: Full=Topoisomerase IV subunit B	gi|112823997		74 kDa		0.36	1	[]	unknown	21	20	17	12	3	0
335	TRUE	Empty	MULTISPECIES: 50S ribosomal protein L33 [Bacteria]	gi|447188453		6 kDa	TRUE	0.49	1.1	[]	unknown	19	20	21	14	10	4
336	TRUE	Empty	MULTISPECIES: protease [Bacteria]	gi|446771048		48 kDa		0.34	1.8	[]	unknown	4	7	3	1	1	0
337	TRUE	Empty	MULTISPECIES: surface anchored protein [Bacteria]	gi|447074644		71 kDa		0.31	0.7	[]	unknown	6	4	13	0	1	0
338	TRUE	Empty	hypothetical protein SAOUHSC_02604 [Staphylococcus aureus subsp. aureus NCTC 8325]	gi|88196246		32 kDa		0.17	0.8	[]	unknown	30	25	23	23	18	5
339	TRUE	Empty	MULTISPECIES: ABC transporter ATP-binding protein [Bacteria]	gi|446524728		74 kDa	TRUE	0.55	1	[]	unknown	5	5	3	1	0	0
340	TRUE	Empty	RecName: Full=Putative heme-dependent peroxidase SAOUHSC_00573; AltName: Full=UPF0447 protein SAOUHSC_00573	gi|122540099		29 kDa		0.25	0.8	[]	unknown	17	14	17	1	4	1
341	TRUE	Empty	fructose 1,6-bisphosphatase [Staphylococcus aureus]	gi|446114313		76 kDa		0.31	0.9	[]	unknown	17	15	10	3	1	0
342	TRUE	Empty	ABC transporter ATP-binding protein [Staphylococcus aureus]	gi|446447256		73 kDa	TRUE	0.23	1.8	[]	unknown	6	11	6	2	1	0
343	TRUE	Empty	RecName: Full=Serine-aspartate repeat-containing protein D; Flags: Precursor	gi|122540119		146 kDa	TRUE	0.47	0	[]	unknown	1	0	5	0	0	1
344	TRUE	Empty	oxygen-dependent choline dehydrogenase [Staphylococcus aureus]	gi|445988666		64 kDa		0.32	0.8	[]	unknown	13	11	9	0	0	0
345	TRUE	Empty	MULTISPECIES: aminopeptidase [Bacteria]	gi|446355499		38 kDa		0.44	1.2	[]	unknown	17	21	16	8	9	4
346	TRUE	Empty	MULTISPECIES: virulence factor EsxA [Bacteria]	gi|447163570		11 kDa		0.34	1.3	[]	unknown	18	24	56	13	21	8
347	TRUE	Empty	RecName: Full=Mannitol-1-phosphate 5-dehydrogenase	gi|122538917		41 kDa		0.3	0.9	[]	unknown	27	25	23	15	11	3
348	TRUE	Empty	hypothetical protein SAOUHSC_02793 [Staphylococcus aureus subsp. aureus NCTC 8325]	gi|88196428		68 kDa	TRUE	0.38	1.4	[]	unknown	11	15	10	6	5	1
349	TRUE	Empty	RecName: Full=Glycerol kinase; AltName: Full=ATP:glycerol 3-phosphotransferase; AltName: Full=Glycerokinase; Short=GK	gi|122539675		56 kDa		0.31	1.4	[]	unknown	15	21	17	6	8	0
350	TRUE	Empty	RecName: Full=Aminomethyltransferase; AltName: Full=Glycine cleavage system T protein	gi|122539427		40 kDa		0.56	1.1	[]	unknown	18	20	23	24	11	8
351	TRUE	Empty	RecName: Full=Phosphoribosylaminoimidazole-succinocarboxamide synthase; AltName: Full=SAICAR synthetase	gi|122539825		27 kDa		0.32	1	[]	unknown	35	34	19	22	10	7
352	TRUE	Empty	RecName: Full=Staphylococcal secretory antigen ssaA2; Flags: Precursor	gi|122540640		29 kDa		0.08	1.6	[]	unknown	28	45	39	29	22	21
353	TRUE	Empty	MULTISPECIES: hypoxanthine-guanine phosphoribosyltransferase [Bacteria]	gi|446473429		20 kDa		0.35	1	[]	unknown	25	24	30	13	11	2
354	TRUE	Empty	MULTISPECIES: cytidylate kinase [Bacteria]	gi|446567045		25 kDa		0.5	1.2	[]	unknown	17	20	16	16	8	4
355	TRUE	Empty	RecName: Full=DNA mismatch repair protein MutL	gi|109940102		77 kDa		0.54	1	[]	unknown	6	6	6	5	1	0
356	TRUE	Empty	RecName: Full=Aminoacyltransferase FemA; AltName: Full=Factor essential for expression of methicillin resistance A; AltName: Full=N-acetylmuramoyl-L-alanyl-D-glutamyl-L-lysyl-(N6-glycyl)-D-alanyl-D-alanine-diphosphoundecaprenyl-N-acetylglucosamine:glycine glycyltransferase	gi|110808230		49 kDa		0.55	1.1	[]	unknown	19	21	19	8	6	1
357	TRUE	Empty	RecName: Full=50S ribosomal protein L29	gi|122538860		8 kDa		0.47	1.2	[]	unknown	13	16	16	11	16	15
358	TRUE	Empty	hypothetical protein SAOUHSC_01460 [Staphylococcus aureus subsp. aureus NCTC 8325]	gi|88195178		43 kDa		0.55	1.1	[]	unknown	14	16	16	15	8	2
359	TRUE	Empty	primosomal protein N [Staphylococcus aureus subsp. aureus NCTC 8325]	gi|88194918		93 kDa		0.28	INF	[]	unknown	0	2	2	0	0	0
360	TRUE	Empty	amidophosphoribosyltransferase [Staphylococcus aureus]	gi|446405858		54 kDa		0.49	1.2	[]	unknown	15	18	9	8	3	0
361	TRUE	Empty	MULTISPECIES: tellurite resistance protein TelA [Bacteria]	gi|446060558		43 kDa		0.54	1.1	[]	unknown	28	31	26	11	8	0
362	TRUE	Empty	RecName: Full=GTPase Der; AltName: Full=GTP-binding protein EngA	gi|122539535		49 kDa		0.48	1	[]	unknown	21	22	21	13	12	1
363	TRUE	Empty	RecName: Full=RNA polymerase sigma factor SigA	gi|60393874		42 kDa	TRUE	0.38	0.9	[]	unknown	15	14	16	14	8	3
364	TRUE	Empty	MULTISPECIES: sensor protein kinase WalK [Bacteria]	gi|446794351		70 kDa	TRUE	0.53	INF	[]	unknown	0	1	0	0	0	0
365	TRUE	Empty	2-oxoisovalerate dehydrogenase, E1 component subunit beta [Staphylococcus aureus subsp. aureus NCTC 8325]	gi|88195323		36 kDa		0.42	1	[]	unknown	21	21	23	16	11	2
366	TRUE	Empty	malate:quinone oxidoreductase [Staphylococcus aureus]	gi|446133504		55 kDa		0.21	1.8	[]	unknown	8	14	9	5	1	0
367	TRUE	Empty	MULTISPECIES: 6,7-dimethyl-8-ribityllumazine synthase [Bacteria]	gi|446931295		16 kDa		0.25	0.9	[]	unknown	23	20	33	18	12	5
368	TRUE	Empty	hypothetical protein SAOUHSC_01679 [Staphylococcus aureus subsp. aureus NCTC 8325]	gi|88195385		51 kDa		0.25	0.8	[]	unknown	14	11	12	8	6	0
369	TRUE	Empty	hypothetical protein SAOUHSC_00712 [Staphylococcus aureus subsp. aureus NCTC 8325]	gi|88194477		32 kDa		0.36	1	[]	unknown	21	20	21	15	17	7
370	TRUE	Empty	hypothetical protein SAOUHSC_01861 [Staphylococcus aureus subsp. aureus NCTC 8325]	gi|88195559		40 kDa		0.36	1.3	[]	unknown	26	33	27	17	14	4
371	TRUE	Empty	MULTISPECIES: anti-sigma-B factor antagonist [Bacteria]	gi|446975235		12 kDa		0.52	1.1	[]	unknown	20	23	22	14	18	10
372	TRUE	Empty	RecName: Full=Signal transduction protein TRAP; AltName: Full=Target of RNAIII-activating protein	gi|122540609		20 kDa		0.35	1.4	[]	unknown	14	19	15	10	7	3
373	TRUE	Empty	RecName: Full=UPF0176 protein SAOUHSC_03024	gi|122538519		37 kDa		0.43	1.7	[]	unknown	3	5	6	2	3	0
374	TRUE	Empty	RecName: Full=Phenylalanine--tRNA ligase alpha subunit; AltName: Full=Phenylalanyl-tRNA synthetase alpha subunit; Short=PheRS	gi|123003480		40 kDa		0.039	0.5	[]	unknown	15	7	14	15	5	1
375	TRUE	Empty	RecName: Full=Chaperone protein DnaJ	gi|122539398		42 kDa		0.25	0.9	[]	unknown	22	19	24	7	2	0
376	TRUE	Empty	RecName: Full=Putative aldehyde dehydrogenase AldA	gi|122540368		54 kDa	TRUE	0.2	1.6	[]	unknown	14	22	17	4	0	1
377	TRUE	Empty	MULTISPECIES: NAD-specific glutamate dehydrogenase [Bacteria]	gi|446060632		46 kDa		0.16	1.7	[]	unknown	11	19	14	5	3	0
378	TRUE	Empty	MULTISPECIES: phosphoenolpyruvate carboxykinase [ATP] [Bacteria]	gi|446032051		59 kDa		0.25	0.8	[]	unknown	15	12	6	7	2	0
379	TRUE	Empty	RecName: Full=Probable ATP-dependent helicase DinG homolog	gi|122539544		104 kDa		0.57	1.2	[]	unknown	5	6	3	1	1	0
380	TRUE	Empty	MULTISPECIES: 30S ribosomal protein S10 [Bacteria]	gi|447041411		12 kDa		0.2	0.8	[]	unknown	19	15	14	12	10	9
381	TRUE	Empty	RecName: Full=N-acetylmuramoyl-L-alanine amidase domain-containing protein SAOUHSC_02979; Flags: Precursor	gi|122540508		69 kDa		0.23	1.7	[]	unknown	9	15	19	0	4	1
382	TRUE	Empty	MULTISPECIES: amino acid ABC transporter substrate-binding protein [Bacteria]	gi|446748673		29 kDa		0.39	1.3	[]	unknown	18	23	18	0	0	0
383	TRUE	Empty	RecName: Full=Methionyl-tRNA formyltransferase	gi|123003478		34 kDa		0.5	1.2	[]	unknown	25	29	26	14	8	3
384	TRUE	Empty	RecName: Full=DNA polymerase III subunit alpha	gi|14194671		123 kDa		0.46	0.5	[]	unknown	2	1	0	1	0	0
385	TRUE	Empty	hypothetical protein SAOUHSC_02436 [Staphylococcus aureus subsp. aureus NCTC 8325]	gi|88196090		76 kDa		0.58	1.1	[]	unknown	9	10	4	4	1	0
386	TRUE	Empty	RecName: Full=Peptide chain release factor 3; Short=RF-3	gi|123407067		60 kDa		0.55	1.1	[]	unknown	14	16	14	11	7	0
387	TRUE	Empty	trans-2-enoyl-ACP reductase [Staphylococcus aureus subsp. aureus RN4220]	gi|6180191		28 kDa	TRUE	0.05	2.2	[]	unknown	10	22	40	11	5	0
388	TRUE	Empty	RecName: Full=tRNA-specific 2-thiouridylase MnmA	gi|205829109		42 kDa	TRUE	0.39	1.3	[]	unknown	12	16	17	6	1	0
389	TRUE	Empty	hypothetical protein SAOUHSC_00513 [Staphylococcus aureus subsp. aureus NCTC 8325]	gi|88194294		27 kDa		0.42	0.9	[]	unknown	7	6	11	5	6	1
390	TRUE	Empty	hypothetical protein SAOUHSC_01098 [Staphylococcus aureus subsp. aureus NCTC 8325]	gi|88194844		65 kDa		0.32	1.6	[]	unknown	7	11	7	4	0	0
391	TRUE	Empty	aldehyde dehydrogenase [Staphylococcus aureus subsp. aureus NCTC 8325]	gi|88195822		52 kDa		0.45	1	[]	unknown	25	26	21	8	7	4
392	TRUE	Empty	MULTISPECIES: aminoacyltransferase FemB [Bacteria]	gi|446595752		50 kDa		0.12	0.7	[]	unknown	20	14	17	4	5	0
393	TRUE	Empty	MULTISPECIES: hypothetical protein [Bacteria]	gi|446094064		19 kDa		0.056	2	[]	unknown	13	26	19	0	0	0
394	TRUE	Empty	cytosol aminopeptidase [Staphylococcus aureus subsp. aureus NCTC 8325]	gi|88194636		54 kDa		0.51	1.2	[]	unknown	26	30	30	14	9	2
395	TRUE	Empty	MULTISPECIES: serine protease [Bacteria]	gi|446264270		55 kDa		0.54	2	[]	unknown	1	2	1	0	0	1
396	TRUE	Empty	lipoyltransferase and lipoate-protein ligase [Staphylococcus aureus subsp. aureus NCTC 8325]	gi|88194720		38 kDa		0.23	1.4	[]	unknown	21	30	29	7	4	2
397	TRUE	Empty	RecName: Full=Lipoyl synthase; AltName: Full=Lip-syn; Short=LS; AltName: Full=Lipoate synthase; AltName: Full=Lipoic acid synthase; AltName: Full=Sulfur insertion protein LipA	gi|123407077		35 kDa		0.24	0.7	[]	unknown	11	8	6	10	8	1
398	TRUE	Empty	2-oxoisovalerate dehydrogenase, E1 component subunit alpha [Staphylococcus aureus subsp. aureus NCTC 8325]	gi|88195324		36 kDa		0.5	1.1	[]	unknown	18	19	15	14	6	2
399	TRUE	Empty	hypothetical protein SAOUHSC_00309 [Staphylococcus aureus subsp. aureus NCTC 8325]	gi|88194110		38 kDa		0.43	1.2	[]	unknown	22	27	28	15	8	1
400	TRUE	Empty	MULTISPECIES: tryptophan--tRNA ligase [Bacteria]	gi|446371079		37 kDa		0.43	1	[]	unknown	19	19	18	14	10	2
401	TRUE	Empty	hypothetical protein SAOUHSC_01499 [Staphylococcus aureus subsp. aureus NCTC 8325]	gi|88195215		37 kDa		0.47	1.2	[]	unknown	20	24	20	4	4	0
402	TRUE	Empty	MULTISPECIES: DNA-directed RNA polymerase subunit omega [Bacteria]	gi|446856700		8 kDa		0.31	0.9	[]	unknown	21	19	17	17	11	2
403	TRUE	Empty	hypothetical protein SAOUHSC_02150 [Staphylococcus aureus subsp. aureus NCTC 8325]	gi|88195830		22 kDa		0.47	1.2	[]	unknown	20	24	23	11	14	9
404	TRUE	Empty	hypothetical protein SAOUHSC_02387 [Staphylococcus aureus subsp. aureus NCTC 8325]	gi|88196050		24 kDa		0.34	1	[]	unknown	29	28	21	5	3	4
405	TRUE	Empty	serine-protein kinase RsbW [Staphylococcus aureus subsp. aureus NCTC 8325]	gi|88195965		19 kDa	TRUE	0.52	1.2	[]	unknown	19	22	23	17	15	3
406	TRUE	Empty	MULTISPECIES: 50S ribosomal protein L20 [Bacteria]	gi|447061104		14 kDa		0.58	1.2	[]	unknown	6	7	5	8	8	3
407	TRUE	Empty	MULTISPECIES: hypothetical protein [Bacteria]	gi|447144849		30 kDa		0.23	1.7	[]	unknown	9	15	16	3	4	0
408	TRUE	Empty	MULTISPECIES: LacI family transcriptional regulator [Bacteria]	gi|447192387		30 kDa		0.34	1	[]	unknown	28	27	22	13	9	1
409	TRUE	Empty	ABC transporter ATP-binding protein [Staphylococcus aureus]	gi|446139023		28 kDa		0.28	INF	[]	unknown	0	2	0	0	0	0
410	TRUE	Empty	RecName: Full=Cell cycle protein GpsB; AltName: Full=Guiding PBP1-shuttling protein	gi|122539551		13 kDa		0.006	0.5	[]	unknown	29	14	14	13	14	7
411	TRUE	Empty	RecName: Full=UDP-N-acetylmuramoylalanine--D-glutamate ligase; AltName: Full=D-glutamic acid-adding enzyme; AltName: Full=UDP-N-acetylmuramoyl-L-alanyl-D-glutamate synthetase	gi|122063261		50 kDa		0.13	0.7	[]	unknown	23	17	11	14	8	0
412	TRUE	Empty	RecName: Full=Diapolycopene oxygenase; AltName: Full=4,4'-diaponeurosporene oxidase	gi|122538621		57 kDa		0.23	0.6	[]	unknown	8	5	2	4	1	0
413	TRUE	Empty	phosphoribosylaminoimidazole carboxylase [Staphylococcus aureus]	gi|446784316		17 kDa	TRUE	0.42	1.2	[]	unknown	21	26	16	23	25	14
414	TRUE	Empty	protoporphyrinogen oxidase [Staphylococcus aureus subsp. aureus NCTC 8325]	gi|88195653		52 kDa		0.32	0.8	[]	unknown	9	7	5	0	0	0
415	TRUE	Empty	RecName: Full=Protein FmtA; Flags: Precursor	gi|114149300		46 kDa		0.22	0	[]	unknown	2	0	0	0	0	0
416	TRUE	Empty	MULTISPECIES: mannitol-specific phosphotransferase enzyme IIA component [Bacteria]	gi|447214893		16 kDa		0.096	1.6	[]	unknown	28	44	35	18	19	2
417	TRUE	Empty	hypothetical protein SAOUHSC_00406 [Staphylococcus aureus subsp. aureus NCTC 8325]	gi|88194200		49 kDa		0.19	0.8	[]	unknown	16	12	15	2	4	0
418	TRUE	Empty	peptide ABC transporter substrate-binding protein [Staphylococcus aureus subsp. aureus NCTC 8325]	gi|88196403		60 kDa		0.15	INF	[]	unknown	0	3	2	0	0	0
419	TRUE	Empty	anaerobic ribonucleoside triphosphate reductase [Staphylococcus aureus subsp. aureus NCTC 8325]	gi|88196568		70 kDa		0.13	0.8	[]	unknown	24	18	1	0	0	0
420	TRUE	Empty	RecName: Full=UTP--glucose-1-phosphate uridylyltransferase; AltName: Full=Alpha-D-glucosyl-1-phosphate uridylyltransferase; AltName: Full=UDP-glucose pyrophosphorylase; Short=UDPGP; AltName: Full=Uridine diphosphoglucose pyrophosphorylase	gi|160013896		32 kDa		0.54	1.2	[]	unknown	13	15	15	7	3	0
421	TRUE	Empty	sulfite reductase subunit alpha [Staphylococcus aureus]	gi|446697809		72 kDa		0.25	2	[]	unknown	4	8	4	3	2	2
422	TRUE	Empty	MULTISPECIES: diaminopimelate decarboxylase [Bacteria]	gi|446139091		47 kDa		0.43	1	[]	unknown	29	30	33	10	4	2
423	TRUE	Empty	MULTISPECIES: UDP-N-acetylmuramoylalanyl-D-glutamyl-2, 6-diaminopimelate--D-alanyl-D-alanine ligase [Bacteria]	gi|446534119		50 kDa		0.51	1.1	[]	unknown	16	17	9	13	6	0
424	TRUE	Empty	RecName: Full=3-phosphoshikimate 1-carboxyvinyltransferase; AltName: Full=5-enolpyruvylshikimate-3-phosphate synthase; Short=EPSP synthase; Short=EPSPS	gi|110282937		47 kDa		0.43	1.2	[]	unknown	16	20	19	11	8	0
425	TRUE	Empty	RecName: Full=Probable transcriptional regulatory protein SAOUHSC_00675	gi|119369539		26 kDa		0.55	1.1	[]	unknown	12	13	13	9	10	5
426	TRUE	Empty	MULTISPECIES: 30S ribosomal protein S18 [Bacteria]	gi|446819788		9 kDa		0.59	1.1	[]	unknown	7	8	7	4	8	0
427	TRUE	Empty	hypothetical protein [Staphylococcus aureus]	gi|446606353-DECOY		?		1	INF	[]	unknown	0	0	0	1	0	0
428	TRUE	Empty	MULTISPECIES: ATP synthase subunit gamma [Bacteria]	gi|446079748		32 kDa	TRUE	0.25	0.8	[]	unknown	16	13	8	11	13	2
429	TRUE	Empty	hypothetical protein SAOUHSC_00044 [Staphylococcus aureus subsp. aureus NCTC 8325]	gi|88193865		33 kDa		0.57	1.2	[]	unknown	4	5	3	0	0	0
430	TRUE	Empty	MULTISPECIES: phosphate acyltransferase [Bacteria]	gi|446161889		35 kDa		0.48	1.2	[]	unknown	14	17	17	4	4	0
431	TRUE	Empty	MULTISPECIES: thioredoxin [Bacteria]	gi|446733907		12 kDa		0.47	1.1	[]	unknown	31	33	33	24	21	10
432	TRUE	Empty	lipase [Staphylococcus aureus]	gi|446900917		77 kDa	TRUE	0.47	0	[]	unknown	1	0	0	0	0	0
433	TRUE	Empty	RecName: Full=Probable tRNA sulfurtransferase; AltName: Full=Sulfur carrier protein ThiS sulfurtransferase; AltName: Full=Thiamine biosynthesis protein ThiI; AltName: Full=tRNA 4-thiouridine synthase	gi|122539305		46 kDa		0.42	1.4	[]	unknown	8	11	8	0	0	0
434	TRUE	Empty	UDP-N-acetylmuramyl tripeptide synthetase [Staphylococcus aureus subsp. aureus NCTC 8325]	gi|88195789		49 kDa	TRUE	0.32	0.8	[]	unknown	13	11	9	4	2	0
435	TRUE	Empty	RecName: Full=Dihydrolipoyllysine-residue succinyltransferase component of 2-oxoglutarate dehydrogenase complex; AltName: Full=2-oxoglutarate dehydrogenase complex component E2; Short=OGDC-E2; AltName: Full=Dihydrolipoamide succinyltransferase component of 2-oxoglutarate dehydrogenase complex	gi|122539580		47 kDa		0.31	0.9	[]	unknown	17	15	13	6	4	2
436	TRUE	Empty	ribonuclease Y [Staphylococcus aureus]	gi|446973657		59 kDa		0.22	2.3	[]	unknown	3	7	4	3	1	0
437	TRUE	Empty	MULTISPECIES: histidine--tRNA ligase [Bacteria]	gi|446513480		48 kDa		0.54	1.1	[]	unknown	13	14	15	7	5	1
438	TRUE	Empty	hypothetical protein SAOUHSC_02755 [Staphylococcus aureus subsp. aureus NCTC 8325]	gi|88196391		39 kDa		0.46	1	[]	unknown	14	14	15	5	6	4
439	TRUE	Empty	hypothetical protein SAOUHSC_01604 [Staphylococcus aureus subsp. aureus NCTC 8325]	gi|88195315		14 kDa		0.19	1.6	[]	unknown	13	21	23	4	3	1
440	TRUE	Empty	MULTISPECIES: hypothetical protein [Bacteria]	gi|446082580		49 kDa		0.55	1.5	[]	unknown	2	3	2	0	0	0
441	TRUE	Empty	RecName: Full=HTH-type transcriptional regulator SAOUHSC_02897	gi|123406977		22 kDa		0.47	0	[]	unknown	1	0	1	0	0	0
442	TRUE	Empty	hypothetical protein SAOUHSC_01412 [Staphylococcus aureus subsp. aureus NCTC 8325]	gi|88195138		73 kDa		0.72	1	[]	unknown	1	1	2	1	1	0
443	TRUE	Empty	MULTISPECIES: molybdopterin molybdenumtransferase [Bacteria]	gi|446181863		45 kDa		0.077	0.7	[]	unknown	26	18	24	10	5	0
444	TRUE	Empty	3'-5' exoribonuclease YhaM [Staphylococcus aureus subsp. aureus NCTC 8325]	gi|88195664		36 kDa		0.19	0.7	[]	unknown	14	10	11	6	3	3
445	TRUE	Empty	RecName: Full=Urease subunit alpha; AltName: Full=Urea amidohydrolase subunit alpha	gi|122540650		62 kDa		0.14	0.7	[]	unknown	15	10	7	0	0	0
446	TRUE	Empty	MULTISPECIES: hypothetical protein [Bacteria]	gi|446763555		17 kDa		0.44	0.8	[]	unknown	4	3	2	0	1	0
447	TRUE	Empty	sucrose-6-phosphate hydrolase [Staphylococcus aureus subsp. aureus NCTC 8325]	gi|88195938		58 kDa		0.43	1	[]	unknown	19	19	20	8	9	4
448	TRUE	Empty	MULTISPECIES: diacetyl reductase [(S)-acetoin forming] [Bacteria]	gi|446105916		27 kDa		0.37	1	[]	unknown	33	33	22	11	12	7
449	TRUE	Empty	MULTISPECIES: peptidase T [Bacteria]	gi|446718513		46 kDa		0.49	1.3	[]	unknown	7	9	8	4	4	2
450	TRUE	Empty	MULTISPECIES: arsenate reductase [Bacteria]	gi|446512094		14 kDa		0.21	0.9	[]	unknown	27	23	25	13	10	10
451	TRUE	Empty	hypothetical protein SAOUHSC_02747 [Staphylococcus aureus subsp. aureus NCTC 8325]	gi|88196385		24 kDa		0.33	1.4	[]	unknown	12	17	14	5	7	1
452	TRUE	Empty	RecName: Full=UDP-N-acetylenolpyruvoylglucosamine reductase; AltName: Full=UDP-N-acetylmuramate dehydrogenase	gi|122540001		34 kDa		0.57	1.1	[]	unknown	10	11	6	6	7	0
453	TRUE	Empty	hypothetical protein SAOUHSC_02899 [Staphylococcus aureus subsp. aureus NCTC 8325]	gi|88196527		38 kDa		0.21	1.6	[]	unknown	11	18	10	9	8	5
454	TRUE	Empty	MULTISPECIES: primosomal protein DnaI [Bacteria]	gi|446731365		36 kDa		0.41	0.9	[]	unknown	9	8	9	1	0	0
455	TRUE	Empty	MULTISPECIES: hypothetical protein [Bacteria]	gi|446540389		22 kDa		0.41	1	[]	unknown	23	23	22	14	1	1
456	TRUE	Empty	nitrate reductase [Staphylococcus aureus]	gi|446615299		59 kDa	TRUE	0.46	1.4	[]	unknown	5	7	0	0	0	0
457	TRUE	Empty	2-oxoisovalerate dehydrogenase, E2 component, dihydrolipoamide acetyltransferase [Staphylococcus aureus subsp. aureus NCTC 8325]	gi|88195322		47 kDa		0.42	0.9	[]	unknown	7	6	5	3	4	2
458	TRUE	Empty	hypothetical protein SAOUHSC_02525 [Staphylococcus aureus subsp. aureus NCTC 8325]	gi|88196173		115 kDa		0.57	1	[]	unknown	4	4	4	0	0	0
459	TRUE	Empty	teichoic acid biosynthesis protein F [Staphylococcus aureus subsp. aureus NCTC 8325]	gi|88194031		46 kDa		0.6	1	[]	unknown	3	3	3	0	1	0
460	TRUE	Empty	UDP-N-acetylglucosamine 2-epimerase [Staphylococcus aureus subsp. aureus NCTC 8325]	gi|88193933		43 kDa		0.25	0.9	[]	unknown	20	17	14	2	1	0
461	TRUE	Empty	MULTISPECIES: FMN-dependent NADH-azoreductase [Bacteria]	gi|447074195		23 kDa		0.28	1.5	[]	unknown	13	19	18	6	11	3
462	TRUE	Empty	RecName: Full=50S ribosomal protein L31 type B	gi|148878583		10 kDa		0.4	0.9	[]	unknown	10	9	8	9	10	6
463	TRUE	Empty	RecName: Full=Acetyl-coenzyme A carboxylase carboxyl transferase subunit alpha; Short=ACCase subunit alpha; Short=Acetyl-CoA carboxylase carboxyltransferase subunit alpha	gi|122539315		35 kDa		0.48	1	[]	unknown	11	11	8	9	5	0
464	TRUE	Empty	RecName: Full=Putative phosphoesterase SAOUHSC_00951	gi|122539864		19 kDa		0.16	0.8	[]	unknown	21	16	12	15	15	12
465	TRUE	Empty	ATP-binding cassette transporter A [Staphylococcus aureus subsp. aureus NCTC 8325]	gi|1262136		64 kDa	TRUE	0.24	0.7	[]	unknown	11	8	2	4	0	0
466	TRUE	Empty	RecName: Full=Argininosuccinate lyase; Short=ASAL; AltName: Full=Arginosuccinase	gi|122539897		52 kDa		1	INF	[]	unknown	0	0	1	0	0	0
467	TRUE	Empty	MULTISPECIES: exodeoxyribonuclease 7 large subunit [Bacteria]	gi|447209672		51 kDa		0.51	1	[]	unknown	8	8	6	2	1	0
468	TRUE	Empty	hypothetical protein SAOUHSC_00548 [Staphylococcus aureus subsp. aureus NCTC 8325]	gi|88194327		58 kDa	TRUE	0.48	1.3	[]	unknown	6	8	9	4	5	1
469	TRUE	Empty	hypothetical protein SAOUHSC_02383 [Staphylococcus aureus subsp. aureus NCTC 8325]	gi|88196046		53 kDa		0.44	1	[]	unknown	16	16	22	4	0	0
470	TRUE	Empty	dihydroorotate dehydrogenase 2 [Staphylococcus aureus subsp. aureus NCTC 8325]	gi|88196537		40 kDa		0.16	0.7	[]	unknown	19	14	8	4	2	0
471	TRUE	Empty	haloacid dehalogenase [Staphylococcus aureus]	gi|446516021		32 kDa		0.069	0.6	[]	unknown	16	9	14	9	6	4
472	TRUE	Empty	DNA polymerase III subunit gamma/tau [Staphylococcus aureus]	gi|447031791		63 kDa		0.18	0.7	[]	unknown	12	8	2	4	1	0
473	TRUE	Empty	MULTISPECIES: non-heme ferritin [Bacteria]	gi|446872211		20 kDa		0.077	0.7	[]	unknown	26	18	12	11	8	7
474	TRUE	Empty	hypothetical protein SAOUHSC_01890 [Staphylococcus aureus subsp. aureus NCTC 8325]	gi|88195586		58 kDa		0.18	2.2	[]	unknown	4	9	5	0	3	0
475	TRUE	Empty	hypothetical protein SAOUHSC_01307 [Staphylococcus aureus subsp. aureus NCTC 8325]	gi|88195038		39 kDa		0.34	1.8	[]	unknown	4	7	5	1	0	0
476	TRUE	Empty	hypothetical protein SAOUHSC_02665 [Staphylococcus aureus subsp. aureus NCTC 8325]	gi|88196305		16 kDa		0.059	0.7	[]	unknown	27	18	29	12	13	4
477	TRUE	Empty	RecName: Full=S-adenosylmethionine:tRNA ribosyltransferase-isomerase; AltName: Full=Queuosine biosynthesis protein QueA	gi|122539357		39 kDa		0.44	0.8	[]	unknown	4	3	1	3	0	0
478	TRUE	Empty	zinc-type alcohol dehydrogenase-like protein SACOL2177 [Staphylococcus aureus]	gi|446704599		37 kDa		0.43	1.3	[]	unknown	9	12	15	6	2	0
479	TRUE	Empty	ABC transporter permease [Staphylococcus aureus]	gi|446572561		53 kDa		1	INF	[]	unknown	0	0	0	0	0	0
480	TRUE	Empty	trans-sulfuration enzyme family protein [Staphylococcus aureus subsp. aureus NCTC 8325]	gi|88194215		41 kDa		0.49	1.1	[]	unknown	19	20	28	0	0	0
481	TRUE	Empty	MULTISPECIES: foldase [Bacteria]	gi|446704775		36 kDa		0.39	0.9	[]	unknown	13	12	10	2	3	0
482	TRUE	Empty	RecName: Full=Alanine racemase 1	gi|6647411		43 kDa		0.25	0.8	[]	unknown	13	10	13	9	8	1
483	TRUE	Empty	hypothetical protein SAOUHSC_00227 [Staphylococcus aureus subsp. aureus NCTC 8325]	gi|88194034		66 kDa	TRUE	0.1	0.6	[]	unknown	16	10	12	1	3	0
484	TRUE	Empty	MULTISPECIES: quinol oxidase subunit 2 [Bacteria]	gi|445954981		42 kDa	TRUE	0.079	0.6	[]	unknown	18	11	11	12	6	0
485	TRUE	Empty	hypothetical protein SAOUHSC_01475 [Staphylococcus aureus subsp. aureus NCTC 8325]	gi|88195192		43 kDa		0.49	1.3	[]	unknown	7	9	7	0	1	0
486	TRUE	Empty	aspartate semialdehyde dehydrogenase [Staphylococcus aureus subsp. aureus NCTC 8325]	gi|88195121		36 kDa		0.46	1	[]	unknown	24	25	19	6	4	0
487	TRUE	Empty	RecName: Full=UPF0312 protein SAOUHSC_03022	gi|122538520		19 kDa		0.2	0.8	[]	unknown	22	18	30	3	3	0
488	TRUE	Empty	RecName: Full=Uncharacterized oxidoreductase SAOUHSC_02778	gi|122538683		25 kDa		0.21	1.5	[]	unknown	22	32	33	5	8	4
489	TRUE	Empty	RecName: Full=Octanoyl-[GcvH]:protein N-octanoyltransferase; AltName: Full=Octanoyl-[GcvH]:E2 amidotransferase	gi|338810399		32 kDa	TRUE	0.22	0	[]	unknown	2	0	0	0	0	0
490	TRUE	Empty	RecName: Full=tRNA-2-methylthio-N(6)-dimethylallyladenosine synthase; AltName: Full=(Dimethylallyl)adenosine tRNA methylthiotransferase MiaB; AltName: Full=tRNA-i(6)A37 methylthiotransferase	gi|123407056		59 kDa		0.25	0.8	[]	unknown	15	12	9	10	4	0
491	TRUE	Empty	MULTISPECIES: UvrABC system protein C [Bacteria]	gi|446312674		69 kDa	TRUE	0.72	1	[]	unknown	1	1	0	0	0	0
492	TRUE	Empty	GroES [Staphylococcus aureus subsp. aureus RN4220]	gi|18028156		10 kDa		0.54	1.1	[]	unknown	20	22	29	16	8	2
493	TRUE	Empty	5'-nucleotidase [Staphylococcus aureus subsp. aureus NCTC 8325]	gi|88194087		33 kDa		0.37	0.9	[]	unknown	18	17	12	0	1	1
494	TRUE	Empty	MULTISPECIES: glutathione peroxidase homolog BsaA [Bacteria]	gi|446370223		18 kDa		0.46	1.2	[]	unknown	19	23	16	6	5	0
495	TRUE	Empty	hypothetical protein SAOUHSC_01908 [Staphylococcus aureus subsp. aureus NCTC 8325]	gi|88195603		35 kDa		0.38	1.4	[]	unknown	11	15	9	3	0	0
496	TRUE	Empty	RecName: Full=Copper-exporting P-type ATPase A; AltName: Full=Cu(+)-exporting ATPase	gi|122538628		87 kDa		< 0.00010	INF	1mM Cu high, TSB low	unknown	0	15	18	0	3	0
497	TRUE	Empty	MULTISPECIES: fumarate hydratase class II [Bacteria]	gi|446038369		51 kDa		0.44	1	[]	unknown	17	17	11	12	10	3
498	TRUE	Empty	hypothetical protein SAOUHSC_02774 [Staphylococcus aureus subsp. aureus NCTC 8325]	gi|88196410		16 kDa		0.083	0.6	[]	unknown	19	12	11	15	12	3
499	TRUE	Empty	RecName: Full=Glycerol-3-phosphate dehydrogenase [NAD(P)+]; AltName: Full=NAD(P)H-dependent glycerol-3-phosphate dehydrogenase	gi|118595526		36 kDa		0.51	1	[]	unknown	8	8	7	7	0	0
500	TRUE	Empty	helicase DnaB [Staphylococcus aureus]	gi|446455630		55 kDa		0.29	0.5	[]	unknown	4	2	2	1	0	0
501	TRUE	Empty	chromosome partitioning protein ParA [Staphylococcus aureus]	gi|446881275		38 kDa	TRUE	0.26	1.5	[]	unknown	11	17	13	6	7	0
502	TRUE	Empty	methionine aminopeptidase [Staphylococcus aureus]	gi|446558796		28 kDa		0.56	1.1	[]	unknown	16	18	24	9	12	2
503	TRUE	Empty	MULTISPECIES: glucokinase [Bacteria]	gi|446083459		35 kDa		0.25	0.9	[]	unknown	21	18	16	10	17	0
504	TRUE	Empty	MULTISPECIES: Fur family transcriptional regulator [Bacteria]	gi|446314836		17 kDa		0.35	1.4	[]	unknown	14	19	11	4	0	0
505	TRUE	Empty	MULTISPECIES: hypothetical protein [Staphylococcus]	gi|446079490		8 kDa		0.47	0	[]	unknown	1	0	0	0	0	0
506	TRUE	Empty	hypothetical protein SAOUHSC_02690 [Staphylococcus aureus subsp. aureus NCTC 8325]	gi|88196330		59 kDa		1	INF	[]	unknown	0	0	1	2	3	2
507	TRUE	Empty	dihydropteroate synthase [Staphylococcus aureus subsp. aureus NCTC 8325]	gi|88194274		30 kDa		0.5	1	[]	unknown	9	9	15	3	3	0
508	TRUE	Empty	RecName: Full=UDP-N-acetylmuramate--L-alanine ligase; AltName: Full=UDP-N-acetylmuramoyl-L-alanine synthetase	gi|122539287		49 kDa		0.47	1	[]	unknown	12	12	16	11	4	2
509	TRUE	Empty	transcription termination factor Rho [Staphylococcus aureus subsp. aureus NCTC 8325]	gi|88196025		50 kDa		0.5	1	[]	unknown	9	9	15	4	4	0
510	TRUE	Empty	hypothetical protein SAOUHSC_00909 [Staphylococcus aureus subsp. aureus NCTC 8325]	gi|88194666		32 kDa		0.32	0.8	[]	unknown	12	10	10	2	0	0
511	TRUE	Empty	hypothetical protein SAOUHSC_01979 [Staphylococcus aureus subsp. aureus NCTC 8325]	gi|88195670		18 kDa		0.39	0.9	[]	unknown	14	13	13	17	10	8
512	TRUE	Empty	RecName: Full=Lipase 2; AltName: Full=Glycerol ester hydrolase 2; Flags: Precursor	gi|122540261		76 kDa	TRUE	0.082	0.4	[]	unknown	8	3	3	0	0	0
513	TRUE	Empty	RecName: Full=Serine-rich adhesin for platelets; AltName: Full=Staphylococcus aureus surface protein A; Flags: Precursor	gi|123003413		228 kDa	TRUE	0.43	1.7	[]	unknown	3	5	7	1	2	0
514	TRUE	Empty	RecName: Full=GMP reductase; AltName: Full=Guanosine 5'-monophosphate oxidoreductase; Short=Guanosine monophosphate reductase	gi|122539632		36 kDa		0.54	1.1	[]	unknown	13	14	5	12	10	3
515	TRUE	Empty	carbamoyl-phosphate synthase small chain [Staphylococcus aureus]	gi|447113657		40 kDa		0.28	0.9	[]	unknown	34	32	23	9	4	3
516	TRUE	Empty	type I restriction-modification system subunit S [Staphylococcus aureus subsp. aureus NCTC 8325]	gi|88195627		46 kDa	TRUE	0.55	1	[]	unknown	5	5	4	1	0	0
517	TRUE	Empty	MULTISPECIES: thiol peroxidase [Bacteria]	gi|446862265		17 kDa		0.39	0.9	[]	unknown	12	11	15	3	5	4
518	TRUE	Empty	isocitrate dehydrogenase [Staphylococcus aureus]	gi|446045310		46 kDa		0.16	0.8	[]	unknown	22	17	21	11	10	2
519	TRUE	Empty	capsular polysaccharide biosynthesis protein Cap5E [Staphylococcus aureus subsp. aureus NCTC 8325]	gi|88193931		39 kDa		0.43	1.7	[]	unknown	3	5	3	0	1	0
520	TRUE	Empty	RecName: Full=Transcriptional regulatory protein WalR	gi|123407141		27 kDa		0.2	0.8	[]	unknown	19	15	6	7	2	1
521	TRUE	Empty	phage infection protein [Staphylococcus aureus subsp. aureus NCTC 8325]	gi|88196598		109 kDa		0.27	0.3	[]	unknown	3	1	3	0	0	0
522	TRUE	Empty	RecName: Full=Bifunctional protein GlmU; Includes: RecName: Full=UDP-N-acetylglucosamine pyrophosphorylase; AltName: Full=N-acetylglucosamine-1-phosphate uridyltransferase; Includes: RecName: Full=Glucosamine-1-phosphate N-acetyltransferase	gi|119370598		49 kDa		0.41	0.9	[]	unknown	9	8	9	0	4	0
523	TRUE	Empty	RecName: Full=Endonuclease MutS2	gi|122539777		89 kDa		0.077	4	[]	unknown	2	8	6	2	0	0
524	TRUE	Empty	DNA repair protein RadA [Staphylococcus aureus subsp. aureus NCTC 8325]	gi|161353534		50 kDa		0.45	1.5	[]	unknown	4	6	4	0	0	0
525	TRUE	Empty	quinone oxidoreductase [Staphylococcus aureus]	gi|446495390		37 kDa	TRUE	0.41	1.3	[]	unknown	14	18	13	7	6	1
526	TRUE	Empty	hypothetical protein SAOUHSC_00607 [Staphylococcus aureus subsp. aureus NCTC 8325]	gi|88194377		20 kDa		0.51	1	[]	unknown	8	8	7	2	1	0
527	TRUE	Empty	hypothetical protein SAOUHSC_00319 [Staphylococcus aureus subsp. aureus NCTC 8325]	gi|88194120		39 kDa		0.49	1.3	[]	unknown	7	9	13	2	2	0
528	TRUE	Empty	RecName: Full=Dehydrosqualene desaturase; AltName: Full=4,4'-diapophytoene desaturase; AltName: Full=Diapophytoene desaturase	gi|122538624		57 kDa		0.18	0.7	[]	unknown	12	8	9	2	1	0
529	TRUE	Empty	hypothetical protein SAOUHSC_02915 [Staphylococcus aureus subsp. aureus NCTC 8325]	gi|88196543		64 kDa		0.46	0.5	[]	unknown	2	1	2	0	0	0
530	TRUE	Empty	hypothetical protein SAOUHSC_01782 [Staphylococcus aureus subsp. aureus NCTC 8325]	gi|88195483		23 kDa		0.39	0.9	[]	unknown	12	11	15	3	1	2
531	TRUE	Empty	N-acetylglucosamine-6-phosphate deacetylase [Staphylococcus aureus subsp. aureus NCTC 8325]	gi|88194475		43 kDa		0.09	0.7	[]	unknown	21	14	16	4	2	0
532	TRUE	Empty	MULTISPECIES: urocanate hydratase [Bacteria]	gi|447149567		61 kDa		0.47	0	[]	unknown	1	0	0	0	0	0
533	TRUE	Empty	capsular polysaccharide biosynthesis protein Cap5D [Staphylococcus aureus subsp. aureus NCTC 8325]	gi|88193930		69 kDa		0.53	INF	[]	unknown	0	1	0	0	0	0
534	TRUE	Empty	RecName: Full=Uncharacterized protein SAOUHSC_01413	gi|122540644		29 kDa		0.53	1.1	[]	unknown	14	15	16	7	5	0
535	TRUE	Empty	RecName: Full=UPF0337 protein SAOUHSC_00845	gi|122539936		7 kDa	TRUE	0.59	1.1	[]	unknown	7	8	9	4	5	1
536	TRUE	Empty	isochorismate synthase [Staphylococcus aureus]	gi|446112768		52 kDa	TRUE	0.54	2	[]	unknown	1	2	4	0	0	0
537	TRUE	Empty	MULTISPECIES: hypothetical protein [Staphylococcus]	gi|446180033		9 kDa		0.46	1	[]	unknown	13	13	11	1	0	0
538	TRUE	Empty	MULTISPECIES: ABC transporter substrate-binding protein [Bacteria]	gi|447137405		37 kDa		0.31	2	[]	unknown	3	6	8	0	6	2
539	TRUE	Empty	RecName: Full=Probable endonuclease 4; AltName: Full=Endodeoxyribonuclease IV; AltName: Full=Endonuclease IV	gi|122539415		33 kDa		0.41	0.9	[]	unknown	8	7	6	6	5	1
540	TRUE	Empty	RecName: Full=Xanthine phosphoribosyltransferase; Short=XPRTase	gi|122540209		21 kDa		0.36	0.9	[]	unknown	20	19	21	12	8	3
541	TRUE	Empty	RecName: Full=Serine-aspartate repeat-containing protein C; Flags: Precursor	gi|122540120		108 kDa	TRUE	0.024	0	[]	unknown	5	0	5	0	0	0
542	TRUE	Empty	6-phospho-beta-glucosidase [Staphylococcus aureus]	gi|446086133		55 kDa		0.28	INF	[]	unknown	0	2	0	0	0	0
543	TRUE	Empty	RecName: Full=Clumping factor B; AltName: Full=Fibrinogen receptor B; AltName: Full=Fibrinogen-binding protein B; Flags: Precursor	gi|114149251		94 kDa		0.47	0	[]	unknown	1	0	1	0	0	0
544	TRUE	Empty	RecName: Full=Bifunctional protein PyrR; Includes: RecName: Full=Pyrimidine operon regulatory protein; Includes: RecName: Full=Uracil phosphoribosyltransferase; Short=UPRTase	gi|122539729		20 kDa		0.55	1.1	[]	unknown	14	16	10	7	5	2
545	TRUE	Empty	hypothetical protein SAOUHSC_02827 [Staphylococcus aureus subsp. aureus NCTC 8325]	gi|88196461		11 kDa		0.46	1.2	[]	unknown	12	15	10	9	11	4
546	TRUE	Empty	MHC class II analog protein [Staphylococcus aureus subsp. aureus NCTC 8325]	gi|88195840		66 kDa		0.17	0.8	[]	unknown	24	19	12	2	1	1
547	TRUE	Empty	MULTISPECIES: DNA-directed RNA polymerase subunit delta [Bacteria]	gi|446624137		21 kDa		0.31	0.9	[]	unknown	16	14	16	14	15	6
548	TRUE	Empty	MULTISPECIES: deoxycytidine kinase [Bacteria]	gi|446990006		26 kDa		0.58	1.1	[]	unknown	9	10	14	8	2	1
549	TRUE	Empty	ribosomal large subunit pseudouridine synthase D [Staphylococcus aureus subsp. aureus NCTC 8325]	gi|88195673		31 kDa		0.52	1	[]	unknown	7	7	3	4	1	0
550	TRUE	Empty	MULTISPECIES: NADH dehydrogenase [Bacteria]	gi|446716706		39 kDa		0.51	1.2	[]	unknown	9	11	11	4	0	0
551	TRUE	Empty	MULTISPECIES: FMN-dependent NADPH-azoreductase [Bacteria]	gi|446599915		21 kDa		0.32	0.8	[]	unknown	8	6	6	4	4	2
552	TRUE	Empty	bifunctional preprotein translocase subunit SecD/SecF [Staphylococcus aureus subsp. aureus NCTC 8325]	gi|161353523 (+1)		84 kDa		0.5	1	[]	unknown	9	9	7	5	3	0
553	TRUE	Empty	MULTISPECIES: GntR family transcriptional regulator [Bacteria]	gi|446117277		29 kDa		0.57	1	[]	unknown	4	4	0	1	2	0
554	TRUE	Empty	amino acid ABC transporter ATP-binding protein [Staphylococcus aureus subsp. aureus NCTC 8325]	gi|88196382-DECOY		?		1	INF	[]	unknown	0	0	0	2	0	0
555	TRUE	Empty	hypothetical protein SAOUHSC_01821 [Staphylococcus aureus subsp. aureus NCTC 8325]	gi|88195521		36 kDa		0.3	1.5	[]	unknown	10	15	16	5	3	0
556	TRUE	Empty	hypothetical protein SAOUHSC_02935 [Staphylococcus aureus subsp. aureus NCTC 8325]	gi|88196562		22 kDa		0.48	1.3	[]	unknown	6	8	5	3	1	0
557	TRUE	Empty	amino acid ABC transporter permease [Staphylococcus aureus subsp. aureus NCTC 8325]	gi|88194497		56 kDa		0.45	0.7	[]	unknown	3	2	1	0	0	0
558	TRUE	Empty	threonine synthase [Staphylococcus aureus subsp. aureus NCTC 8325]	gi|88195051		38 kDa		0.35	1.4	[]	unknown	14	19	19	4	6	1
559	TRUE	Empty	MULTISPECIES: hypothetical protein [Bacteria]	gi|446658212		19 kDa		0.06	0.6	[]	unknown	20	12	8	2	3	0
560	TRUE	Empty	RecName: Full=Regulatory protein MsrR	gi|73621230		37 kDa		0.55	1	[]	unknown	5	5	0	1	0	0
561	TRUE	Empty	RNA polymerase sigma factor SigB [Staphylococcus aureus subsp. aureus NCTC 8325]	gi|88195964		29 kDa		0.49	1	[]	unknown	10	10	7	5	3	0
562	TRUE	Empty	hypothetical protein [Staphylococcus aureus]	gi|446090130		66 kDa	TRUE	0.2	0.5	[]	unknown	6	3	4	0	0	0
563	TRUE	Empty	hypothetical protein SAOUHSC_01163 [Staphylococcus aureus subsp. aureus NCTC 8325]	gi|88194903		35 kDa		0.23	0.7	[]	unknown	9	6	4	6	3	3
564	TRUE	Empty	hypothetical protein SAOUHSC_01415 [Staphylococcus aureus subsp. aureus NCTC 8325]	gi|88195141		30 kDa		0.31	1.4	[]	unknown	20	27	23	17	12	5
565	TRUE	Empty	RecName: Full=Thymidylate synthase; Short=TS; Short=TSase	gi|123291799		37 kDa		0.31	0.7	[]	unknown	6	4	5	0	2	0
566	TRUE	Empty	hypothetical protein SAOUHSC_02258 [Staphylococcus aureus subsp. aureus NCTC 8325]	gi|88195929		24 kDa		0.41	0.9	[]	unknown	9	8	8	1	1	0
567	TRUE	Empty	MULTISPECIES: cell division protein DivIVA [Bacteria]	gi|447039808		24 kDa		0.31	0.9	[]	unknown	18	16	21	11	12	11
568	TRUE	Empty	cell division protein FtsK [Staphylococcus aureus]	gi|445957912		88 kDa		0.54	2	[]	unknown	1	2	1	0	0	0
569	TRUE	Empty	RecName: Full=N utilization substance protein B homolog; Short=Protein NusB	gi|119390828		15 kDa		0.5	1	[]	unknown	9	9	9	3	3	0
570	TRUE	Empty	RecName: Full=Aspartate carbamoyltransferase; AltName: Full=Aspartate transcarbamylase; Short=ATCase	gi|122539727		33 kDa		0.2	0.8	[]	unknown	21	17	17	6	6	4
571	TRUE	Empty	RecName: Full=Putative pyruvate, phosphate dikinase regulatory protein; Short=PPDK regulatory protein	gi|122539411		31 kDa		0.25	0.8	[]	unknown	15	12	9	4	3	0
572	TRUE	Empty	CCA-adding enzyme [Staphylococcus aureus]	gi|446283689		46 kDa		0.57	1.2	[]	unknown	5	6	7	3	2	0
573	TRUE	Empty	nickel ABC transporter substrate-binding protein [Staphylococcus aureus]	gi|446592307		55 kDa	TRUE	0.55	1.1	[]	unknown	12	13	7	1	1	0
574	TRUE	Empty	MULTISPECIES: accessory Sec system glycosyltransferase GtfA [Bacteria]	gi|446080578		58 kDa		0.53	INF	[]	unknown	0	1	0	0	0	0
575	TRUE	Empty	RecName: Full=GTPase Era	gi|317374940		34 kDa		0.59	1.1	[]	unknown	8	9	9	3	0	0
576	TRUE	Empty	RecName: Full=Conserved virulence factor B	gi|123291800		34 kDa		0.54	1.2	[]	unknown	12	14	15	7	7	6
577	TRUE	Empty	riboflavin biosynthesis protein RibBA [Staphylococcus aureus]	gi|447081766		44 kDa		0.65	1	[]	unknown	2	2	6	0	0	0
578	TRUE	Empty	RecName: Full=Octanoyltransferase LipM; AltName: Full=Octanoyl-[acyl-carrier-protein]:[GcvH] N-octanoyltransferase	gi|122539431		32 kDa		0.32	0.8	[]	unknown	9	7	4	11	4	0
579	TRUE	Empty	RecName: Full=Pantothenate synthetase; Short=PS; AltName: Full=Pantoate--beta-alanine ligase; AltName: Full=Pantoate-activating enzyme	gi|122538590		32 kDa		0.46	1	[]	unknown	13	13	14	0	2	0
580	TRUE	Empty	RecName: Full=Pyrimidine-nucleoside phosphorylase; Short=PYNP	gi|119390861		46 kDa		0.25	0.8	[]	unknown	14	11	11	1	2	1
581	TRUE	Empty	MULTISPECIES: D-alanyl-lipoteichoic acid biosynthesis protein DltD [Bacteria]	gi|446692070		45 kDa		0.11	2.4	[]	unknown	5	12	14	2	4	0
582	TRUE	Empty	MULTISPECIES: non-canonical purine NTP pyrophosphatase [Bacteria]	gi|446581971		21 kDa		0.22	1.6	[]	unknown	12	19	16	7	8	2
583	TRUE	Empty	RecName: Full=Putative NAD(P)H nitroreductase SAOUHSC_02829	gi|122538658		25 kDa		0.39	1.3	[]	unknown	12	16	17	4	4	1
584	TRUE	Empty	MULTISPECIES: succinate dehydrogenase iron-sulfur subunit [Bacteria]	gi|446061857		31 kDa		0.22	0.6	[]	unknown	7	4	0	2	3	0
585	TRUE	Empty	MULTISPECIES: hypothetical protein [Bacteria]	gi|446102375		51 kDa		0.36	1.6	[]	unknown	5	8	9	2	0	0
586	TRUE	Empty	multidrug efflux protein [Staphylococcus aureus]	gi|446660901		23 kDa		0.46	0.5	[]	unknown	2	1	2	0	0	0
587	TRUE	Empty	RecName: Full=Phenol-soluble modulin alpha 4 peptide	gi|206557899		2 kDa		0.65	1	[]	unknown	2	2	0	0	1	0
588	TRUE	Empty	RecName: Full=Histidine protein kinase SaeS; AltName: Full=Sensor protein SaeS; AltName: Full=Staphylococcus exoprotein expression protein S	gi|123003529		40 kDa		0.6	1	[]	unknown	3	3	2	0	0	0
589	TRUE	Empty	hypothetical protein SAOUHSC_00838 [Staphylococcus aureus subsp. aureus NCTC 8325]	gi|88194596		34 kDa		0.6	1	[]	unknown	3	3	4	1	1	0
590	TRUE	Empty	MULTISPECIES: haloacid dehalogenase [Bacteria]	gi|446589751		24 kDa		0.46	0.5	[]	unknown	2	1	1	0	0	0
591	TRUE	Empty	sucrose operon repressor [Staphylococcus aureus subsp. aureus NCTC 8325]	gi|88195939		35 kDa		0.54	2	[]	unknown	1	2	0	0	0	0
592	TRUE	Empty	RecName: Full=PTS system glucose-specific EIICBA component; AltName: Full=EIICBA-Glc; Short=EII-Glc; Includes: RecName: Full=Glucose permease IIC component; AltName: Full=PTS system glucose-specific EIIC component; Includes: RecName: Full=Glucose-specific phosphotransferase enzyme IIB component; AltName: Full=PTS system glucose-specific EIIB component; Includes: RecName: Full=Glucose-specific pho…	gi|209573761		74 kDa	TRUE	0.32	0.8	[]	unknown	8	6	5	5	1	0
593	TRUE	Empty	glutamate synthase subunit beta [Staphylococcus aureus subsp. aureus NCTC 8325]	gi|88194227		54 kDa		0.15	INF	[]	unknown	0	3	0	0	1	0
594	TRUE	Empty	dephospho-CoA kinase [Staphylococcus aureus subsp. aureus NCTC 8325]	gi|88195495		24 kDa		0.55	1.1	[]	unknown	12	13	9	8	8	2
595	TRUE	Empty	MULTISPECIES: nitrogen-fixing protein NifU [Bacteria]	gi|446933252		17 kDa		0.46	1.2	[]	unknown	12	15	15	8	4	0
596	TRUE	Empty	RecName: Full=Cell division protein DivIB	gi|122539742		50 kDa		0.14	5	[]	unknown	1	5	3	0	0	0
597	TRUE	Empty	hypothetical protein SAOUHSC_00808 [Staphylococcus aureus subsp. aureus NCTC 8325]	gi|88194568		28 kDa	TRUE	0.27	0.3	[]	unknown	3	1	3	0	0	0
598	TRUE	Empty	carboxylesterase [Staphylococcus aureus subsp. aureus NCTC 8325]	gi|88194562		28 kDa		0.43	0.8	[]	unknown	5	4	5	2	0	0
599	TRUE	Empty	hypothetical protein SAOUHSC_00584 [Staphylococcus aureus subsp. aureus NCTC 8325]	gi|88194358		52 kDa		0.22	4	[]	unknown	1	4	5	1	0	0
600	TRUE	Empty	MULTISPECIES: phosphopantothenoylcysteine decarboxylase [Bacteria]	gi|446644819		44 kDa		0.38	1.5	[]	unknown	6	9	9	3	1	0
601	TRUE	Empty	MULTISPECIES: 30S ribosomal protein S12 [Bacteria]	gi|447065081		15 kDa		< 0.00010	10	1mM Cu high, TSB low	unknown	3	30	27	17	0	0
602	TRUE	Empty	RecName: Full=Chorismate synthase; Short=CS; AltName: Full=5-enolpyruvylshikimate-3-phosphate phospholyase	gi|119366070		43 kDa		0.52	1	[]	unknown	7	7	9	3	1	0
603	TRUE	Empty	RecName: Full=UPF0637 protein SAOUHSC_01054	gi|122540621		24 kDa		0.55	1.1	[]	unknown	14	16	18	6	6	3
604	TRUE	Empty	hypothetical protein SAOUHSC_01594 [Staphylococcus aureus subsp. aureus NCTC 8325]	gi|88195305		34 kDa		0.46	1	[]	unknown	13	13	10	5	5	1
605	TRUE	Empty	MULTISPECIES: 2-ketogluconate reductase [Bacteria]	gi|446161276		35 kDa		0.52	1.2	[]	unknown	10	12	9	3	7	0
606	TRUE	Empty	MULTISPECIES: hypothetical protein [Bacteria]	gi|446311669		48 kDa	TRUE	0.4	1.4	[]	unknown	7	10	7	3	3	3
607	TRUE	Empty	peptide ABC transporter substrate-binding protein [Staphylococcus aureus]	gi|446119164		62 kDa		0.28	INF	[]	unknown	0	2	0	0	0	0
608	TRUE	Empty	hypothetical protein SAOUHSC_01838 [Staphylococcus aureus subsp. aureus NCTC 8325]	gi|88195538		46 kDa		0.31	0.9	[]	unknown	15	13	13	4	3	0
609	TRUE	Empty	MULTISPECIES: hypothetical protein [Bacteria]	gi|446978641		11 kDa		0.32	1.6	[]	unknown	7	11	14	2	0	0
610	TRUE	Empty	hypothetical protein SAOUHSC_00603 [Staphylococcus aureus subsp. aureus NCTC 8325]	gi|88194373		35 kDa		0.51	1.2	[]	unknown	18	21	16	4	3	0
611	TRUE	Empty	RecName: Full=UPF0478 protein SAOUHSC_01855	gi|122540527		18 kDa		0.44	1	[]	unknown	16	16	16	12	5	4
612	TRUE	Empty	hypothetical protein SAOUHSC_02649 [Staphylococcus aureus subsp. aureus NCTC 8325]	gi|88196289		65 kDa		0.31	0.7	[]	unknown	6	4	6	1	0	0
613	TRUE	Empty	hypothetical protein SAOUHSC_00581 [Staphylococcus aureus subsp. aureus NCTC 8325]	gi|88194355		48 kDa		0.32	0.8	[]	unknown	13	11	26	4	1	0
614	TRUE	Empty	hydroxymethylglutaryl-CoA reductase [Staphylococcus aureus subsp. aureus NCTC 8325]	gi|88196490		46 kDa		0.49	1.3	[]	unknown	7	9	8	2	0	0
615	TRUE	Empty	ferrochelatase [Staphylococcus aureus subsp. aureus NCTC 8325]	gi|88195654		35 kDa		0.42	1.4	[]	unknown	8	11	3	3	1	0
616	TRUE	Empty	hypothetical protein SAOUHSC_01907 [Staphylococcus aureus subsp. aureus NCTC 8325]	gi|88195602		31 kDa		0.53	1.1	[]	unknown	22	24	16	1	4	0
617	TRUE	Empty	hypothetical protein SAOUHSC_01138 [Staphylococcus aureus subsp. aureus NCTC 8325]	gi|88194880		17 kDa		0.55	1.1	[]	unknown	14	16	11	9	5	4
618	TRUE	Empty	pyrroline-5-carboxylate reductase [Staphylococcus aureus]	gi|446702402		30 kDa		0.32	0.9	[]	unknown	14	12	14	8	8	4
619	TRUE	Empty	RecName: Full=ATP-dependent DNA helicase RecG	gi|3914612		78 kDa		0.55	1.5	[]	unknown	2	3	3	0	0	0
620	TRUE	Empty	MULTISPECIES: chitinase [Bacteria]	gi|446067644		40 kDa		0.43	1.7	[]	unknown	3	5	5	1	0	0
621	TRUE	Empty	MULTISPECIES: translation initiation factor IF-1 [Bacteria]	gi|447041187		8 kDa		0.22	0.6	[]	unknown	7	4	1	5	3	0
622	TRUE	Empty	replicative DNA helicase [Staphylococcus aureus subsp. aureus NCTC 8325]	gi|88193839		53 kDa		0.17	0.6	[]	unknown	10	6	7	4	3	0
623	TRUE	Empty	Chain P, Structure Of Beta Hairpin Deletion Mutant Of Beta Toxin From Staphylococcus Aureus	gi|320089775		35 kDa	TRUE	0.49	1	[]	unknown	10	10	7	2	3	0
624	TRUE	Empty	MULTISPECIES: tRNA pseudouridine synthase B [Bacteria]	gi|446204450		35 kDa		0.2	0.5	[]	unknown	6	3	3	2	0	0
625	TRUE	Empty	RecName: Full=HPr kinase/phosphorylase; Short=HPrK/P; AltName: Full=HPr(Ser) kinase/phosphorylase	gi|122539979		34 kDa		0.54	1.2	[]	unknown	13	15	14	4	1	0
626	TRUE	Empty	hypothetical protein SAOUHSC_00253 [Staphylococcus aureus subsp. aureus NCTC 8325]	gi|88194059		58 kDa		0.72	1	[]	unknown	1	1	2	0	0	0
627	TRUE	Empty	alpha-acetolactate decarboxylase [Staphylococcus aureus subsp. aureus NCTC 8325]	gi|88196119		26 kDa	TRUE	0.15	0.7	[]	unknown	17	12	10	0	0	0
628	TRUE	Empty	MULTISPECIES: esterase [Bacteria]	gi|446543518		36 kDa	TRUE	0.38	0.9	[]	unknown	15	14	14	2	0	0
629	TRUE	Empty	hypothetical protein SAOUHSC_01869 [Staphylococcus aureus subsp. aureus NCTC 8325]	gi|88195566		16 kDa		0.38	1.5	[]	unknown	6	9	10	4	6	0
630	TRUE	Empty	riboflavin biosynthesis protein RibF [Staphylococcus aureus subsp. aureus NCTC 8325]	gi|88194982		37 kDa		0.58	1.1	[]	unknown	9	10	11	4	1	1
631	TRUE	Empty	L-asparaginase [Staphylococcus aureus]	gi|446604410		36 kDa		0.36	1.6	[]	unknown	5	8	6	4	2	0
632	TRUE	Empty	RecName: Full=2-succinyl-5-enolpyruvyl-6-hydroxy-3-cyclohexene-1-carboxylate synthase; Short=SEPHCHC synthase; AltName: Full=Menaquinone biosynthesis protein MenD	gi|122539837		63 kDa		0.6	1	[]	unknown	3	3	5	1	0	0
633	TRUE	Empty	MULTISPECIES: glyoxalase [Bacteria]	gi|446786729		30 kDa		0.5	1.2	[]	unknown	8	10	11	4	2	1
634	TRUE	Empty	RecName: Full=S-ribosylhomocysteine lyase; AltName: Full=AI-2 synthesis protein; AltName: Full=Autoinducer-2 production protein LuxS	gi|122538937		18 kDa		0.22	2.3	[]	unknown	3	7	3	4	3	0
635	TRUE	Empty	MULTISPECIES: phosphate starvation protein PhoH [Bacteria]	gi|447040511		35 kDa		0.56	1.1	[]	unknown	16	18	16	12	3	1
636	TRUE	Empty	MULTISPECIES: phosphofructokinase [Bacteria]	gi|446563397		33 kDa		0.25	0.9	[]	unknown	23	20	21	3	1	0
637	TRUE	Empty	haloacid dehalogenase [Staphylococcus aureus]	gi|446108458		30 kDa		0.39	1.3	[]	unknown	12	16	11	7	4	3
638	TRUE	Empty	hypothetical protein SAOUHSC_02844 [Staphylococcus aureus subsp. aureus NCTC 8325]	gi|88196477		37 kDa		0.35	1.4	[]	unknown	9	13	11	1	0	0
639	TRUE	Empty	MULTISPECIES: adenine phosphoribosyltransferase [Bacteria]	gi|446286687		19 kDa		0.32	0.8	[]	unknown	10	8	10	6	4	0
640	TRUE	Empty	alpha amylase family protein [Staphylococcus aureus subsp. aureus NCTC 8325]	gi|88194229		64 kDa		0.72	1	[]	unknown	1	1	0	0	0	0
641	TRUE	Empty	MULTISPECIES: hypothetical protein [Bacteria]	gi|446010340		21 kDa		0.46	1	[]	unknown	14	14	13	10	9	3
642	TRUE	Empty	RecName: Full=Protein-arginine kinase	gi|123003498		39 kDa		0.32	1.6	[]	unknown	7	11	5	1	1	0
643	TRUE	Empty	2-oxoglutarate ferredoxin oxidoreductase subunit beta [Staphylococcus aureus]	gi|446112289		31 kDa		0.52	1	[]	unknown	7	7	8	4	4	0
644	TRUE	Empty	hypothetical protein SAOUHSC_02138 [Staphylococcus aureus subsp. aureus NCTC 8325]	gi|88195818		41 kDa		0.56	1.3	[]	unknown	3	4	1	1	0	0
645	TRUE	Empty	dihydroxyacetone kinase subunit DhaL [Staphylococcus aureus]	gi|446789947		21 kDa		0.2	0.5	[]	unknown	6	3	1	0	0	0
646	TRUE	Empty	hypothetical protein SAOUHSC_01781 [Staphylococcus aureus subsp. aureus NCTC 8325]	gi|88195482		36 kDa		0.15	INF	[]	unknown	0	3	0	0	0	0
647	TRUE	Empty	phosphoribosylglycinamide formyltransferase [Staphylococcus aureus subsp. aureus NCTC 8325]	gi|88194770		21 kDa		0.32	0.8	[]	unknown	11	9	7	3	2	0
648	TRUE	Empty	ornithine carbamoyltransferase [Staphylococcus aureus]	gi|446716285		38 kDa	TRUE	0.53	INF	[]	unknown	0	1	0	0	0	0
649	TRUE	Empty	RecName: Full=Staphopain A; AltName: Full=Staphylococcal cysteine proteinase A; AltName: Full=Staphylopain A; Flags: Precursor	gi|110816431		44 kDa		0.046	2.7	[]	unknown	6	16	18	0	0	0
650	TRUE	Empty	amino acid ABC transporter ATP-binding protein [Staphylococcus aureus subsp. aureus NCTC 8325]	gi|88196382		46 kDa		0.54	1	[]	unknown	6	6	1	0	1	0
651	TRUE	Empty	RecName: Full=Probable nitronate monooxygenase; AltName: Full=Nitroalkane oxidase	gi|122539927		39 kDa		0.31	2	[]	unknown	3	6	2	3	2	0
652	TRUE	Empty	epimerase/dehydratase [Staphylococcus aureus subsp. aureus NCTC 8325]	gi|88196375		31 kDa		0.16	1.6	[]	unknown	17	27	22	3	2	0
653	TRUE	Empty	RecName: Full=Phosphoribosylformylglycinamidine cyclo-ligase; AltName: Full=AIR synthase; AltName: Full=AIRS; AltName: Full=Phosphoribosyl-aminoimidazole synthetase	gi|119366334		37 kDa		0.17	0.8	[]	unknown	24	19	8	9	9	0
654	TRUE	Empty	GTP-binding protein YqeH [Staphylococcus aureus subsp. aureus NCTC 8325]	gi|88195406		41 kDa		0.53	1.2	[]	unknown	11	13	8	5	0	0
655	TRUE	Empty	hypothetical protein SAOUHSC_01255 [Staphylococcus aureus subsp. aureus NCTC 8325]	gi|88194988		49 kDa		0.48	1	[]	unknown	11	11	12	6	5	0
656	TRUE	Empty	MULTISPECIES: demethylmenaquinone methyltransferase [Bacteria]	gi|446697338		27 kDa		0.58	1.1	[]	unknown	9	10	8	2	0	0
657	TRUE	Empty	restriction modification system specificity subunit [Staphylococcus aureus subsp. aureus NCTC 8325]	gi|88194193		47 kDa	TRUE	0.59	1.1	[]	unknown	7	8	7	4	3	0
658	TRUE	Empty	hypothetical protein SAOUHSC_01968 [Staphylococcus aureus subsp. aureus NCTC 8325]	gi|88195660		16 kDa		0.19	1.9	[]	unknown	7	13	11	6	9	1
659	TRUE	Empty	transcriptional regulator [Staphylococcus aureus]	gi|447206356		24 kDa		0.53	1.2	[]	unknown	11	13	15	7	8	2
660	TRUE	Empty	hypothetical protein SAOUHSC_02908 [Staphylococcus aureus subsp. aureus NCTC 8325]	gi|88196536		33 kDa		0.23	0.6	[]	unknown	8	5	5	1	0	0
661	TRUE	Empty	RecName: Full=Uncharacterized peptidase SAOUHSC_01816	gi|123003454		40 kDa		0.58	1.1	[]	unknown	9	10	11	5	3	1
662	TRUE	Empty	RecName: Full=UPF0435 protein SAOUHSC_02093	gi|148841345		8 kDa		0.49	1.2	[]	unknown	15	18	20	5	7	5
663	TRUE	Empty	hypothetical protein SAOUHSC_01723 [Staphylococcus aureus subsp. aureus NCTC 8325]	gi|88195428		93 kDa		0.52	1	[]	unknown	7	7	2	2	0	0
664	TRUE	Empty	ribosomal biogenesis GTPase [Staphylococcus aureus subsp. aureus NCTC 8325]	gi|88194951		33 kDa		0.18	0.7	[]	unknown	13	9	8	3	2	0
665	TRUE	Empty	MULTISPECIES: UDP-N-acetylglucosamine 2-epimerase [Bacteria]	gi|446646072		42 kDa		0.55	1	[]	unknown	5	5	5	2	0	0
666	TRUE	Empty	MULTISPECIES: ABC transporter ATP-binding protein [Bacteria]	gi|446685702		33 kDa		0.54	1.1	[]	unknown	13	14	4	6	1	0
667	TRUE	Empty	geranyltranstransferase [Staphylococcus aureus subsp. aureus NCTC 8325]	gi|88195328		33 kDa		0.23	0.6	[]	unknown	8	5	6	3	1	0
668	TRUE	Empty	RecName: Full=Uncharacterized lipoprotein SAOUHSC_00405; Flags: Precursor	gi|143754853		31 kDa	TRUE	0.54	1.1	[]	unknown	13	14	16	7	6	2
669	TRUE	Empty	RecName: Full=Guanylate kinase; AltName: Full=GMP kinase	gi|119371297		24 kDa		0.34	1.5	[]	unknown	8	12	9	7	6	1
670	TRUE	Empty	RecName: Full=Porphobilinogen deaminase; Short=PBG; AltName: Full=Hydroxymethylbilane synthase; Short=HMBS; AltName: Full=Pre-uroporphyrinogen synthase	gi|11386773		34 kDa		0.45	1.3	[]	unknown	11	14	16	4	2	0
671	TRUE	Empty	RecName: Full=Superoxide dismutase [Mn] 1	gi|60415930		23 kDa		0.31	0.9	[]	unknown	16	14	18	16	14	6
672	TRUE	Empty	aminobenzoyl-glutamate utilization protein B [Staphylococcus aureus]	gi|447214244		43 kDa		0.59	1.1	[]	unknown	7	8	8	0	1	0
673	TRUE	Empty	RecName: Full=Orotidine 5'-phosphate decarboxylase; AltName: Full=OMP decarboxylase; Short=OMPDCase; Short=OMPdecase	gi|122539723		26 kDa		0.38	0.9	[]	unknown	16	15	19	9	6	5
674	TRUE	Empty	transcriptional regulator [Staphylococcus aureus]	gi|446611148		28 kDa		0.52	1	[]	unknown	7	7	2	3	4	0
675	TRUE	Empty	MULTISPECIES: GntR family transcriptional regulator [Bacteria]	gi|446912877		27 kDa		0.47	0	[]	unknown	1	0	0	0	0	0
676	TRUE	Empty	hypothetical protein SAOUHSC_00754 [Staphylococcus aureus subsp. aureus NCTC 8325]	gi|88194518		34 kDa		1	INF	[]	unknown	0	0	0	0	0	0
677	TRUE	Empty	RecName: Full=Immunoglobulin-binding protein sbi; Flags: Precursor	gi|122538740		50 kDa		0.12	0.6	[]	unknown	12	7	4	0	0	0
678	TRUE	Empty	ABC transporter permease [Staphylococcus aureus]	gi|446065768		72 kDa		0.72	1	[]	unknown	1	1	1	0	0	0
679	TRUE	Empty	gluconate kinase [Staphylococcus aureus subsp. aureus NCTC 8325]	gi|88196442		58 kDa		0.65	1	[]	unknown	2	2	1	0	0	0
680	TRUE	Empty	MULTISPECIES: UDP-N-acetyl-D-mannosamine dehydrogenase [Bacteria]	gi|446702151		47 kDa		0.096	0.7	[]	unknown	23	16	11	7	5	0
681	TRUE	Empty	MULTISPECIES: hypothetical protein [Bacteria]	gi|446908361		12 kDa		0.49	1.3	[]	unknown	7	9	11	10	8	2
682	TRUE	Empty	MULTISPECIES: NAD kinase [Bacteria]	gi|447193578		31 kDa		0.4	2	[]	unknown	2	4	4	1	1	0
683	TRUE	Empty	MULTISPECIES: 30S ribosomal protein S20 [Staphylococcus]	gi|447196761		9 kDa		0.57	1.2	[]	unknown	4	5	4	5	5	1
684	TRUE	Empty	MULTISPECIES: arginine deiminase [Bacteria]	gi|446051556		47 kDa		0.32	0.8	[]	unknown	10	8	5	0	0	0
685	TRUE	Empty	RecName: Full=Uroporphyrinogen decarboxylase; Short=UPD; Short=URO-D	gi|122539215		39 kDa		0.48	1	[]	unknown	11	11	5	5	5	1
686	TRUE	Empty	hypothetical protein SAOUHSC_02585 [Staphylococcus aureus subsp. aureus NCTC 8325]	gi|88196228		27 kDa		0.57	1.2	[]	unknown	4	5	4	3	0	0
687	TRUE	Empty	MULTISPECIES: Rrf2 family transcriptional regulator [Staphylococcus]	gi|446626776		16 kDa	TRUE	0.48	1	[]	unknown	20	21	19	15	13	0
688	TRUE	Empty	MULTISPECIES: serine/threonine protein kinase [Bacteria]	gi|446501710		74 kDa		0.47	0	[]	unknown	1	0	0	0	0	0
689	TRUE	Empty	hypothetical protein SAOUHSC_00989 [Staphylococcus aureus subsp. aureus NCTC 8325]	gi|88194746		43 kDa		0.54	2	[]	unknown	1	2	0	0	0	0
690	TRUE	Empty	alpha-D-1,4-glucosidase [Staphylococcus aureus subsp. aureus NCTC 8325]	gi|88195312		64 kDa		0.56	1.3	[]	unknown	3	4	1	2	0	0
691	TRUE	Empty	citrate synthase [Staphylococcus aureus]	gi|446751911		43 kDa	TRUE	0.47	0	[]	unknown	1	0	2	4	1	0
692	TRUE	Empty	hypothetical protein [Staphylococcus aureus]	gi|446650710		38 kDa		0.28	INF	[]	unknown	0	2	0	0	0	0
693	TRUE	Empty	RecName: Full=Uridylate kinase; Short=UK; AltName: Full=Uridine monophosphate kinase; Short=UMP kinase; Short=UMPK	gi|123407058		26 kDa		0.067	2.2	[]	unknown	8	18	8	6	6	1
694	TRUE	Empty	recombination factor protein RarA [Staphylococcus aureus subsp. aureus NCTC 8325]	gi|161353524		47 kDa		0.43	0.8	[]	unknown	5	4	1	0	3	0
695	TRUE	Empty	RecName: Full=Phenol-soluble modulin alpha 1 peptide	gi|206557863		2 kDa	TRUE	< 0.00010	0.2	1mM Cu low, TSB high	unknown	25	5	1	3	1	0
696	TRUE	Empty	23S rRNA (adenine(2503)-C(2))-methyltransferase RlmN [Staphylococcus aureus]	gi|446549551		42 kDa		0.32	0.8	[]	unknown	10	8	10	4	0	0
697	TRUE	Empty	hypothetical protein SAOUHSC_01284 [Staphylococcus aureus subsp. aureus NCTC 8325]	gi|88195016		45 kDa		0.59	1.1	[]	unknown	8	9	7	2	0	0
698	TRUE	Empty	hypothetical protein SAOUHSC_00402 [Staphylococcus aureus subsp. aureus NCTC 8325]	gi|88194197		31 kDa	TRUE	0.72	1	[]	unknown	1	1	0	0	0	0
699	TRUE	Empty	RecName: Full=Peptide methionine sulfoxide reductase MsrB; AltName: Full=Peptide-methionine (R)-S-oxide reductase	gi|59799842		16 kDa		0.58	1.2	[]	unknown	6	7	5	2	1	0
700	TRUE	Empty	hypothetical protein SAOUHSC_01332 [Staphylococcus aureus subsp. aureus NCTC 8325]	gi|88195062		34 kDa		0.18	0.4	[]	unknown	5	2	2	0	0	0
701	TRUE	Empty	hypothetical protein SAOUHSC_01283 [Staphylococcus aureus subsp. aureus NCTC 8325]	gi|88195015		47 kDa		0.53	INF	[]	unknown	0	1	0	0	0	0
702	TRUE	Empty	alanine dehydrogenase [Staphylococcus aureus]	gi|446882173		40 kDa		0.29	0.5	[]	unknown	4	2	0	0	0	0
703	TRUE	Empty	acetyl-CoA carboxylase biotin carboxyl carrier protein [Staphylococcus aureus]	gi|446932260		17 kDa		0.16	1.9	[]	unknown	8	15	10	13	9	5
704	TRUE	Empty	MULTISPECIES: regulatory protein Spx [Bacteria]	gi|446180148		15 kDa		0.48	1	[]	unknown	11	11	6	6	4	2
705	TRUE	Empty	RecName: Full=N-acetylmuramoyl-L-alanine amidase sle1; Flags: Precursor	gi|114149220		36 kDa		0.21	0.8	[]	unknown	24	20	9	0	7	3
706	TRUE	Empty	RecName: Full=Pyridoxal 5'-phosphate synthase subunit PdxT; AltName: Full=Pdx2; AltName: Full=Pyridoxal 5'-phosphate synthase glutaminase subunit	gi|119388918		21 kDa		0.46	1.2	[]	unknown	12	15	13	8	7	2
707	TRUE	Empty	5-methyltetrahydropteroyltriglutamate--homocysteine S-methyltransferase [Staphylococcus aureus subsp. aureus NCTC 8325]	gi|88194138		85 kDa		0.14	5	[]	unknown	1	5	3	0	1	0
708	TRUE	Empty	RecName: Full=Chromosomal replication initiator protein DnaA	gi|123291872		52 kDa		0.29	0.5	[]	unknown	4	2	3	0	0	0
709	TRUE	Empty	MULTISPECIES: hypothetical protein [Staphylococcus]	gi|446056924		12 kDa		0.58	1.2	[]	unknown	6	7	8	2	3	2
710	TRUE	Empty	RecName: Full=tRNA (guanine-N(1)-)-methyltransferase; AltName: Full=M1G-methyltransferase; AltName: Full=tRNA [GM37] methyltransferase	gi|119371001		28 kDa		1	INF	[]	unknown	0	0	0	0	0	0
711	TRUE	Empty	hypothetical protein [Staphylococcus aureus]	gi|446169054		9 kDa		0.22	0	[]	unknown	2	0	0	0	0	0
712	TRUE	Empty	MULTISPECIES: acetyltransferase [Bacteria]	gi|446542848		20 kDa		0.32	0.8	[]	unknown	13	11	9	3	1	0
713	TRUE	Empty	phi PVL orfs 18-19-like protein [Staphylococcus aureus subsp. aureus NCTC 8325]	gi|88195857		57 kDa		1	INF	[]	unknown	0	0	0	0	0	1
714	TRUE	Empty	MULTISPECIES: GTP pyrophosphokinase [Bacteria]	gi|447000427		25 kDa		0.32	1.6	[]	unknown	7	11	9	5	4	0
715	TRUE	Empty	hypothetical protein SAOUHSC_00307 [Staphylococcus aureus subsp. aureus NCTC 8325]	gi|88194108		36 kDa		0.28	INF	[]	unknown	0	2	1	0	0	0
716	TRUE	Empty	MULTISPECIES: transcriptional regulator [Bacteria]	gi|446799500		30 kDa		0.43	1.7	[]	unknown	3	5	5	3	2	0
717	TRUE	Empty	RecName: Full=Ferredoxin--NADP reductase; Short=FNR; Short=Fd-NADP(+) reductase	gi|122538773		38 kDa		0.28	INF	[]	unknown	0	2	1	0	1	0
718	TRUE	Empty	hypothetical protein SAOUHSC_02751 [Staphylococcus aureus subsp. aureus NCTC 8325]	gi|88196387		52 kDa		0.3	1.7	[]	unknown	6	10	1	2	0	0
719	TRUE	Empty	MULTISPECIES: hypothetical protein [Bacteria]	gi|445948453		8 kDa		0.32	1.5	[]	unknown	11	16	14	5	3	3
720	TRUE	Empty	RNA methyltransferase [Staphylococcus aureus subsp. aureus NCTC 8325]	gi|88195795		52 kDa		0.46	0.5	[]	unknown	2	1	1	0	0	0
721	TRUE	Empty	MULTISPECIES: hypothetical protein [Bacteria]	gi|446413900		24 kDa		0.41	0.9	[]	unknown	9	8	10	6	3	0
722	TRUE	Empty	hypothetical protein SAOUHSC_00079 [Staphylococcus aureus subsp. aureus NCTC 8325]	gi|88193894		66 kDa		0.53	INF	[]	unknown	0	1	0	0	0	0
723	TRUE	Empty	peptidase T [Staphylococcus aureus subsp. aureus NCTC 8325]	gi|88195317		40 kDa		0.38	1.4	[]	unknown	11	15	19	6	4	2
724	TRUE	Empty	MULTISPECIES: hypothetical protein [Bacteria]	gi|446974300		20 kDa		0.57	1.2	[]	unknown	4	5	4	2	3	0
725	TRUE	Empty	hypothetical protein SAOUHSC_01027 [Staphylococcus aureus subsp. aureus NCTC 8325]	gi|88194780		20 kDa		0.17	0.6	[]	unknown	10	6	7	0	0	0
726	TRUE	Empty	MULTISPECIES: hypothetical protein [Bacteria]	gi|447186732		26 kDa	TRUE	0.3	1.7	[]	unknown	6	10	9	1	1	0
727	TRUE	Empty	S-adenosyl-methyltransferase MraW [Staphylococcus aureus subsp. aureus NCTC 8325]	gi|88194885		35 kDa		0.19	0.8	[]	unknown	16	12	9	5	4	0
728	TRUE	Empty	MULTISPECIES: RNA-binding protein [Bacteria]	gi|446877975		11 kDa		0.56	1.3	[]	unknown	3	4	4	4	8	2
729	TRUE	Empty	2-oxoisovalerate dehydrogenase, E1 component subunit beta [Staphylococcus aureus subsp. aureus NCTC 8325]	gi|88195323-DECOY		?		1	INF	[]	unknown	0	0	0	1	0	0
730	TRUE	Empty	MULTISPECIES: SAM-dependent methyltransferase [Bacteria]	gi|446607733		45 kDa		0.52	1.2	[]	unknown	10	12	13	0	4	0
731	TRUE	Empty	RecName: Full=ATP synthase subunit delta; AltName: Full=ATP synthase F(1) sector subunit delta; AltName: Full=F-type ATPase subunit delta; Short=F-ATPase subunit delta	gi|123291763		20 kDa		0.41	0.9	[]	unknown	9	8	6	4	6	0
732	TRUE	Empty	RecName: Full=Uridine kinase; AltName: Full=Cytidine monophosphokinase; AltName: Full=Uridine monophosphokinase	gi|122539376		24 kDa		0.22	0.6	[]	unknown	7	4	9	1	0	0
733	TRUE	Empty	MULTISPECIES: acyl-CoA thioester hydrolase [Bacteria]	gi|446128178		15 kDa		0.4	2	[]	unknown	2	4	7	1	0	0
734	TRUE	Empty	RecName: Full=Protein NagD homolog	gi|122064537		28 kDa		0.47	1	[]	unknown	12	12	13	11	6	5
735	TRUE	Empty	hypothetical protein SAOUHSC_02146 [Staphylococcus aureus subsp. aureus NCTC 8325]	gi|88195826		40 kDa		0.57	1.2	[]	unknown	5	6	5	3	0	0
736	TRUE	Empty	MULTISPECIES: nitrogen-fixing protein NifU [Bacteria]	gi|447064627		9 kDa		0.49	1	[]	unknown	10	10	9	8	4	3
737	TRUE	Empty	RecName: Full=50S ribosomal protein L9	gi|119370966		17 kDa		0.015	0.4	[]	unknown	20	9	13	4	0	0
738	TRUE	Empty	pencillin binding protein 4 [Staphylococcus aureus subsp. aureus NCTC 8325]	gi|1864022		48 kDa	TRUE	0.47	0	[]	unknown	1	0	0	0	0	0
739	TRUE	Empty	methionine import ATP-binding protein MetN 1 [Staphylococcus aureus]	gi|446491432		39 kDa		0.28	INF	[]	unknown	0	2	0	0	0	0
740	TRUE	Empty	hypothetical protein SAOUHSC_00030 [Staphylococcus aureus subsp. aureus NCTC 8325]	gi|88193851		68 kDa		0.43	0.8	[]	unknown	5	4	3	1	1	0
741	TRUE	Empty	RecName: Full=Immunoglobulin G-binding protein A; Short=IgG-binding protein A; AltName: Full=Staphylococcal protein A; Flags: Precursor	gi|110283003		56 kDa	TRUE	1	INF	[]	unknown	0	0	0	0	0	0
742	TRUE	Empty	MULTISPECIES: hypothetical protein [Bacteria]	gi|446349057		10 kDa		0.37	1.4	[]	unknown	10	14	12	9	10	6
743	TRUE	Empty	ribosome silencing factor RsfS [Staphylococcus aureus]	gi|447010766		13 kDa		0.54	1	[]	unknown	6	6	4	5	4	1
744	TRUE	Empty	MULTISPECIES: ribosome-binding factor A [Bacteria]	gi|446019467		14 kDa		0.38	1.5	[]	unknown	6	9	2	3	1	0
745	TRUE	Empty	MULTISPECIES: hypothetical protein [Bacteria]	gi|446759209		11 kDa		0.56	1.3	[]	unknown	3	4	2	4	4	2
746	TRUE	Empty	RecName: Full=Probable GTP-binding protein EngB	gi|119369264		23 kDa		0.51	1	[]	unknown	8	8	8	3	1	0
747	TRUE	Empty	RecName: Full=Probable quinol oxidase subunit 1; AltName: Full=Quinol oxidase polypeptide I	gi|123291824		75 kDa		0.022	0.4	[]	unknown	15	6	3	1	1	0
748	TRUE	Empty	formate dehydrogenase [Staphylococcus aureus subsp. aureus NCTC 8325]	gi|88193954		38 kDa		0.53	INF	[]	unknown	0	1	3	0	1	0
749	TRUE	Empty	MULTISPECIES: lysophospholipase [Bacteria]	gi|446188241		32 kDa		0.22	0	[]	unknown	2	0	0	0	0	0
750	TRUE	Empty	MULTISPECIES: cyclic pyranopterin monophosphate synthase [Bacteria]	gi|446152318		39 kDa		0.6	1	[]	unknown	3	3	2	0	0	0
751	TRUE	Empty	MULTISPECIES: hypothetical protein [Bacteria]	gi|446445810		18 kDa		0.46	0.5	[]	unknown	2	1	0	2	0	0
752	TRUE	Empty	bacillithiol biosynthesis deacetylase BshB2 [Staphylococcus aureus]	gi|446051208		25 kDa		0.45	0.7	[]	unknown	3	2	5	1	0	0
753	TRUE	Empty	haloacid dehalogenase [Staphylococcus aureus]	gi|446287499		28 kDa		0.47	0	[]	unknown	1	0	0	0	0	0
754	TRUE	Empty	RecName: Full=Isopentenyl-diphosphate delta-isomerase; Short=IPP isomerase; AltName: Full=Isopentenyl diphosphate:dimethylallyl diphosphate isomerase; AltName: Full=Isopentenyl pyrophosphate isomerase; AltName: Full=Type 2 isopentenyl diphosphate isomerase; Short=IDI-2	gi|122538789		39 kDa		0.58	1.2	[]	unknown	6	7	10	3	2	0
755	TRUE	Empty	RecName: Full=UDP-N-acetylglucosamine--N-acetylmuramyl-(pentapeptide) pyrophosphoryl-undecaprenol N-acetylglucosamine transferase; AltName: Full=Undecaprenyl-PP-MurNAc-pentapeptide-UDPGlcNAc GlcNAc transferase	gi|122539575		40 kDa		0.41	0.9	[]	unknown	9	8	4	1	0	0
756	TRUE	Empty	MULTISPECIES: allophanate hydrolase [Bacteria]	gi|445944468		38 kDa		0.65	1	[]	unknown	2	2	3	0	0	0
757	TRUE	Empty	hypothetical protein SAOUHSC_00763 [Staphylococcus aureus subsp. aureus NCTC 8325]	gi|88194526		24 kDa		0.54	1	[]	unknown	6	6	7	4	2	0
758	TRUE	Empty	RecName: Full=Uncharacterized leukocidin-like protein 1; Flags: Precursor	gi|122539026		39 kDa		0.0029	0.2	[]	unknown	16	4	1	0	0	0
759	TRUE	Empty	RecName: Full=Formimidoylglutamase; AltName: Full=Formiminoglutamase; AltName: Full=Formiminoglutamate hydrolase	gi|118582039		35 kDa		0.4	0.9	[]	unknown	11	10	11	5	6	0
760	TRUE	Empty	RecName: Full=Phosphatidylglycerol lysyltransferase; AltName: Full=Lysylphosphatidylglycerol synthase; Short=LPG synthase; AltName: Full=Multiple peptide resistance factor	gi|110810462		97 kDa		0.55	1.5	[]	unknown	2	3	2	0	0	0
761	TRUE	Empty	MULTISPECIES: hypothetical protein [Bacteria]	gi|446289564		16 kDa		0.59	1.1	[]	unknown	7	8	6	5	5	1
762	TRUE	Empty	hypothetical protein SAOUHSC_02009 [Staphylococcus aureus subsp. aureus NCTC 8325]	gi|88195697		58 kDa		0.46	0.5	[]	unknown	2	1	2	0	0	0
763	TRUE	Empty	competence-damage inducible protein cinA [Staphylococcus aureus subsp. aureus NCTC 8325]	gi|88194994		43 kDa		0.59	1.1	[]	unknown	7	8	5	1	2	0
764	TRUE	Empty	hypothetical protein SAOUHSC_01895 [Staphylococcus aureus subsp. aureus NCTC 8325]	gi|88195590		33 kDa		0.65	1	[]	unknown	2	2	2	2	2	0
765	TRUE	Empty	RecName: Full=Uncharacterized leukocidin-like protein 2; Flags: Precursor	gi|122539025		40 kDa		0.031	0.5	[]	unknown	22	12	3	3	0	0
766	TRUE	Empty	A/G-specific adenine glycosylase [Staphylococcus aureus]	gi|446206897		41 kDa		0.72	1	[]	unknown	1	1	1	0	0	0
767	TRUE	Empty	hypothetical protein SAOUHSC_00480 [Staphylococcus aureus subsp. aureus NCTC 8325]	gi|88194265		45 kDa		0.57	1.2	[]	unknown	4	5	9	1	1	0
768	TRUE	Empty	RecName: Full=6-phospho-beta-galactosidase; AltName: Full=Beta-D-phosphogalactoside galactohydrolase; Short=PGALase; AltName: Full=P-beta-Gal; Short=PBG	gi|118572757		55 kDa		0.53	INF	[]	unknown	0	1	0	0	0	0
769	TRUE	Empty	MULTISPECIES: radical SAM protein [Bacteria]	gi|446448684		36 kDa		0.43	0.8	[]	unknown	5	4	4	1	1	0
770	TRUE	Empty	RecName: Full=Transcriptional regulatory protein SrrA; AltName: Full=Staphylococcal respiratory response protein A	gi|123291792		28 kDa		0.31	0.9	[]	unknown	15	13	9	9	5	0
771	TRUE	Empty	MULTISPECIES: tyrosine recombinase XerD [Bacteria]	gi|446369878		34 kDa		0.65	1	[]	unknown	2	2	1	0	0	0
772	TRUE	Empty	thioredoxin [Staphylococcus aureus subsp. aureus NCTC 8325]	gi|88194592		12 kDa		0.25	0.9	[]	unknown	20	17	18	17	15	11
773	TRUE	Empty	RecName: Full=4-diphosphocytidyl-2-C-methyl-D-erythritol kinase; Short=CMK; AltName: Full=4-(cytidine-5'-diphospho)-2-C-methyl-D-erythritol kinase	gi|122540156		31 kDa		0.27	2.5	[]	unknown	2	5	2	0	0	0
774	TRUE	Empty	transcriptional regulator [Staphylococcus aureus]	gi|446075675		24 kDa		0.59	1.1	[]	unknown	7	8	5	0	2	0
775	TRUE	Empty	capsular polysaccharide biosynthesis protein Cap5I [Staphylococcus aureus subsp. aureus NCTC 8325]	gi|88193935		43 kDa		0.11	0.3	[]	unknown	6	2	2	0	0	0
776	TRUE	Empty	MULTISPECIES: DNA repair exonuclease [Bacteria]	gi|446160372		46 kDa		0.082	0.4	[]	unknown	8	3	8	0	4	0
777	TRUE	Empty	hypothetical protein SAOUHSC_00022 [Staphylococcus aureus subsp. aureus NCTC 8325]	gi|88193843		49 kDa		0.47	0	[]	unknown	1	0	0	0	0	0
778	TRUE	Empty	MULTISPECIES: thymidine kinase [Bacteria]	gi|446195501		22 kDa		0.23	0.7	[]	unknown	9	6	9	6	3	0
779	TRUE	Empty	MULTISPECIES: hypothetical protein [Bacteria]	gi|446537366		19 kDa		0.57	1.1	[]	unknown	10	11	12	7	6	0
780	TRUE	Empty	MULTISPECIES: pseudouridine synthase B [Bacteria]	gi|446081722		28 kDa		0.43	0.8	[]	unknown	6	5	11	8	7	3
781	TRUE	Empty	MULTISPECIES: phosphoglycerate mutase [Bacteria]	gi|446080519		23 kDa		0.24	0.7	[]	unknown	11	8	6	8	4	0
782	TRUE	Empty	MULTISPECIES: hypothetical protein [Bacteria]	gi|446686422		15 kDa		0.16	0.6	[]	unknown	9	5	6	1	1	0
783	TRUE	Empty	diacylglycerol kinase [Staphylococcus aureus]	gi|447154195		35 kDa		0.52	1	[]	unknown	7	7	9	6	1	0
784	TRUE	Empty	MULTISPECIES: hypothetical protein [Bacteria]	gi|447014131		33 kDa		0.34	1.8	[]	unknown	4	7	5	3	1	0
785	TRUE	Empty	hypothetical protein SAOUHSC_01915 [Staphylococcus aureus subsp. aureus NCTC 8325]	gi|88195610		38 kDa		0.53	INF	[]	unknown	0	1	0	0	0	0
786	TRUE	Empty	MULTISPECIES: hypothetical protein [Bacteria]	gi|446605300		29 kDa		0.65	1	[]	unknown	2	2	2	0	0	0
787	TRUE	Empty	RecName: Full=2,3,4,5-tetrahydropyridine-2,6-dicarboxylate N-acetyltransferase; AltName: Full=Tetrahydrodipicolinate N-acetyltransferase; Short=THP acetyltransferase; Short=Tetrahydropicolinate acetylase	gi|122539592		25 kDa		0.56	1.1	[]	unknown	11	12	9	3	2	0
788	TRUE	Empty	MULTISPECIES: Vitamin B12 ABC transporter substrate-binding protein [Bacteria]	gi|446671713		33 kDa		0.29	0.5	[]	unknown	4	2	6	0	0	0
789	TRUE	Empty	MULTISPECIES: homoserine dehydrogenase [Bacteria]	gi|446658518		47 kDa		0.49	1.3	[]	unknown	7	9	12	2	2	0
790	TRUE	Empty	tRNA-dihydrouridine synthase [Staphylococcus aureus]	gi|446584685		38 kDa	TRUE	0.6	1	[]	unknown	3	3	3	2	1	0
791	TRUE	Empty	RecName: Full=Regulatory protein RecX	gi|122540622		32 kDa		0.57	1	[]	unknown	4	4	6	0	0	0
792	TRUE	Empty	hypothetical protein [Staphylococcus aureus]	gi|445993496		9 kDa		0.32	1.6	[]	unknown	7	11	14	5	5	0
793	TRUE	Empty	hypothetical protein SAOUHSC_00686 [Staphylococcus aureus subsp. aureus NCTC 8325]	gi|88194451		11 kDa		0.38	0.9	[]	unknown	15	14	12	7	4	3
794	TRUE	Empty	zinc metalloprotease [Staphylococcus aureus]	gi|446043261		48 kDa	TRUE	0.53	INF	[]	unknown	0	1	0	0	0	0
795	TRUE	Empty	MutT/nudix family protein [Staphylococcus aureus subsp. aureus NCTC 8325]	gi|88194221		15 kDa		0.46	0.5	[]	unknown	2	1	2	1	1	0
796	TRUE	Empty	hypothetical protein SAOUHSC_02460 [Staphylococcus aureus subsp. aureus NCTC 8325]	gi|88196112		32 kDa		0.48	1.2	[]	unknown	14	17	16	6	11	1
797	TRUE	Empty	RecName: Full=Carbamate kinase 2	gi|38604739		34 kDa		0.55	1	[]	unknown	5	5	2	0	0	0
798	TRUE	Empty	cap5L protein/glycosyltransferase [Staphylococcus aureus subsp. aureus NCTC 8325]	gi|88193938		47 kDa		0.47	0	[]	unknown	1	0	0	0	0	0
799	TRUE	Empty	hypothetical protein SAOUHSC_00547 [Staphylococcus aureus subsp. aureus NCTC 8325]	gi|88194326		57 kDa	TRUE	0.18	0.4	[]	unknown	5	2	2	0	0	0
800	TRUE	Empty	hypothetical protein SAOUHSC_02433 [Staphylococcus aureus subsp. aureus NCTC 8325]	gi|88196087		40 kDa		0.47	0	[]	unknown	1	0	0	0	0	0
801	TRUE	Empty	RecName: Full=Uncharacterized protein SAOUHSC_00997; AltName: Full=ORF1; Flags: Precursor	gi|109940181		46 kDa		0.45	0.7	[]	unknown	3	2	3	1	0	0
802	TRUE	Empty	capsular polysaccharide biosynthesis protein Cap5I [Staphylococcus aureus subsp. aureus NCTC 8325]	gi|88193935-DECOY		?		1	INF	[]	unknown	0	0	0	0	0	0
803	TRUE	Empty	MULTISPECIES: hypothetical protein [Bacteria]	gi|445943590		15 kDa		0.21	2	[]	unknown	5	10	9	5	4	1
804	TRUE	Empty	phosphonate ABC transporter ATP-binding protein [Staphylococcus aureus]	gi|446817205		28 kDa	TRUE	0.27	1.6	[]	unknown	8	13	10	2	7	0
805	TRUE	Empty	RecName: Full=Ketol-acid reductoisomerase; AltName: Full=Acetohydroxy-acid isomeroreductase; AltName: Full=Alpha-keto-beta-hydroxylacyl reductoisomerase	gi|116248162		37 kDa		0.006	INF	[]	unknown	0	8	2	0	0	0
806	TRUE	Empty	hypothetical protein [Staphylococcus aureus]	gi|446107722		30 kDa	TRUE	0.22	0	[]	unknown	2	0	0	0	0	0
807	TRUE	Empty	RecName: Full=Iron-sulfur cluster repair protein ScdA; AltName: Full=Cell wall-related protein ScdA	gi|110282995		25 kDa	TRUE	0.48	1	[]	unknown	11	11	7	2	0	0
808	TRUE	Empty	ornithine carbamoyltransferase [Staphylococcus aureus]	gi|446058311		38 kDa	TRUE	0.32	0.8	[]	unknown	10	8	7	0	0	0
809	TRUE	Empty	MULTISPECIES: hypothetical protein [Bacteria]	gi|446093563		13 kDa		0.028	0.5	[]	unknown	21	11	21	5	14	1
810	TRUE	Empty	MULTISPECIES: transcriptional regulator [Bacteria]	gi|446050511		82 kDa		0.44	0.8	[]	unknown	4	3	0	0	0	0
811	TRUE	Empty	radical SAM domain-containing protein [Staphylococcus aureus]	gi|447168192		44 kDa	TRUE	1	INF	[]	unknown	0	0	0	0	0	0
812	TRUE	Empty	hypothetical protein SAOUHSC_00408 [Staphylococcus aureus subsp. aureus NCTC 8325]	gi|88194202		12 kDa		0.72	1	[]	unknown	1	1	3	0	1	0
813	TRUE	Empty	MULTISPECIES: 3-demethylubiquinone-9 3-methyltransferase [Bacteria]	gi|446276329		15 kDa		0.05	0	[]	unknown	4	0	3	1	0	0
814	TRUE	Empty	hypothetical protein SAOUHSC_01998 [Staphylococcus aureus subsp. aureus NCTC 8325]	gi|88195686		36 kDa		0.55	1	[]	unknown	5	5	2	1	0	0
815	TRUE	Empty	MULTISPECIES: peptide chain release factor 2 [Bacteria]	gi|446762869		38 kDa	TRUE	0.6	1	[]	unknown	3	3	3	1	1	1
816	TRUE	Empty	aminotransferase [Staphylococcus aureus]	gi|486200275		43 kDa		0.6	1	[]	unknown	3	3	4	0	0	0
817	TRUE	Empty	MULTISPECIES: hypothetical protein [Bacteria]	gi|446614596		9 kDa		0.6	1	[]	unknown	3	3	3	2	4	4
818	TRUE	Empty	MULTISPECIES: ribitol-5-phosphate dehydrogenase [Bacteria]	gi|446532857		38 kDa	TRUE	0.37	1.4	[]	unknown	10	14	16	7	7	2
819	TRUE	Empty	hypothetical protein SAOUHSC_00497 [Staphylococcus aureus subsp. aureus NCTC 8325]	gi|88194279		54 kDa		0.53	INF	[]	unknown	0	1	0	0	0	0
820	TRUE	Empty	hypothetical protein SAOUHSC_02724 [Staphylococcus aureus subsp. aureus NCTC 8325]	gi|88196364		26 kDa		0.18	3	[]	unknown	2	6	4	1	1	0
821	TRUE	Empty	acetolactate synthase large subunit [Staphylococcus aureus subsp. aureus NCTC 8325]	gi|88195952		64 kDa		0.72	1	[]	unknown	1	1	0	0	0	0
822	TRUE	Empty	MULTISPECIES: hypothetical protein [Bacteria]	gi|446357951		12 kDa	TRUE	0.57	1.2	[]	unknown	5	6	9	3	1	0
823	TRUE	Empty	RecName: Full=5'-methylthioadenosine/S-adenosylhomocysteine nucleosidase; Short=MTA/SAH nucleosidase; Short=MTAN; AltName: Full=5'-methylthioadenosine nucleosidase; Short=MTA nucleosidase; AltName: Full=S-adenosylhomocysteine nucleosidase; Short=AdoHcy nucleosidase; Short=SAH nucleosidase; Short=SRH nucleosidase	gi|122539387		25 kDa		0.43	1.3	[]	unknown	9	12	19	6	7	2
824	TRUE	Empty	hypothetical protein SAOUHSC_02106 [Staphylococcus aureus subsp. aureus NCTC 8325]	gi|88195788		27 kDa		0.56	1.3	[]	unknown	3	4	3	2	3	0
825	TRUE	Empty	hypothetical protein SAOUHSC_01454 [Staphylococcus aureus subsp. aureus NCTC 8325]	gi|88195173		33 kDa		0.31	0.7	[]	unknown	7	5	9	4	1	0
826	TRUE	Empty	hypothetical protein SAOUHSC_00531 [Staphylococcus aureus subsp. aureus NCTC 8325]	gi|88194311		44 kDa		0.5	1.2	[]	unknown	8	10	4	1	1	0
827	TRUE	Empty	sigmaB regulation protein RsbU, putative [Staphylococcus aureus subsp. aureus NCTC 8325]	gi|87203525		30 kDa		0.39	0.9	[]	unknown	14	13	9	5	5	0
828	TRUE	Empty	RecName: Full=Organic hydroperoxide resistance protein-like	gi|122540446		15 kDa		0.45	1.5	[]	unknown	4	6	8	3	4	1
829	TRUE	Empty	MULTISPECIES: ornithine cyclodeaminase [Bacteria]	gi|447001200		38 kDa		0.28	INF	[]	unknown	0	2	1	0	0	0
830	TRUE	Empty	membrane protein [Staphylococcus aureus]	gi|446940607		57 kDa		0.28	INF	[]	unknown	0	2	0	0	0	0
831	TRUE	Empty	haloacid dehalogenase [Staphylococcus aureus]	gi|446207595		24 kDa		0.31	0.7	[]	unknown	7	5	5	2	1	1
832	TRUE	Empty	MULTISPECIES: NADPH-dependent 7-cyano-7-deazaguanine reductase [Bacteria]	gi|446852758		20 kDa		0.65	1	[]	unknown	2	2	3	2	0	0
833	TRUE	Empty	MULTISPECIES: diphosphomevalonate decarboxylase [Bacteria]	gi|446519989		37 kDa		0.41	0.9	[]	unknown	8	7	4	6	4	0
834	TRUE	Empty	aminopeptidase PepS [Staphylococcus aureus subsp. aureus NCTC 8325]	gi|88195775-DECOY		?		0.53	INF	[]	unknown	0	1	0	0	0	0
835	TRUE	Empty	MULTISPECIES: glycerol-3-phosphate responsive antiterminator [Bacteria]	gi|447000379		20 kDa		0.46	1.4	[]	unknown	5	7	8	3	2	0
836	TRUE	Empty	phosphomevalonate kinase [Staphylococcus aureus subsp. aureus NCTC 8325]	gi|88194353		40 kDa		0.24	0.7	[]	unknown	11	8	7	2	0	0
837	TRUE	Empty	hypothetical protein SAOUHSC_00382 [Staphylococcus aureus subsp. aureus NCTC 8325]	gi|88194179		32 kDa		0.55	1	[]	unknown	5	5	8	3	1	1
838	TRUE	Empty	hypothetical protein SAOUHSC_00164 [Staphylococcus aureus subsp. aureus NCTC 8325]	gi|88193975		36 kDa		0.28	INF	[]	unknown	0	2	1	0	0	0
839	TRUE	Empty	RecName: Full=Ribosomal RNA small subunit methyltransferase A; AltName: Full=16S rRNA (adenine(1518)-N(6)/adenine(1519)-N(6))-dimethyltransferase; AltName: Full=16S rRNA dimethyladenosine transferase; AltName: Full=16S rRNA dimethylase; AltName: Full=S-adenosylmethionine-6-N', N'-adenosyl(rRNA) dimethyltransferase	gi|119365847		34 kDa	TRUE	0.59	1.1	[]	unknown	8	9	5	5	2	0
840	TRUE	Empty	cardiolipin synthase [Staphylococcus aureus]	gi|447135604		56 kDa	TRUE	0.47	0	[]	unknown	1	0	0	0	0	0
841	TRUE	Empty	DNA primase [Staphylococcus aureus subsp. aureus NCTC 8325]	gi|88195370		69 kDa		0.47	0	[]	unknown	1	0	0	2	0	0
842	TRUE	Empty	hypothetical protein SAOUHSC_00749 [Staphylococcus aureus subsp. aureus NCTC 8325]	gi|88194514		38 kDa		0.4	2	[]	unknown	2	4	0	0	0	0
843	TRUE	Empty	RecName: Full=Uracil-DNA glycosylase; Short=UDG	gi|122540104		25 kDa		0.35	3	[]	unknown	1	3	2	1	2	0
844	TRUE	Empty	hypothetical protein SAOUHSC_02905 [Staphylococcus aureus subsp. aureus NCTC 8325]	gi|88196533		12 kDa		0.42	0.9	[]	unknown	7	6	10	2	3	1
845	TRUE	Empty	MULTISPECIES: glycerate kinase [Bacteria]	gi|447099607		41 kDa		0.54	2	[]	unknown	1	2	0	0	0	0
846	TRUE	Empty	hypothetical protein SAOUHSC_00960 [Staphylococcus aureus subsp. aureus NCTC 8325]	gi|88194717		58 kDa		0.3	0.6	[]	unknown	5	3	1	3	0	0
847	TRUE	Empty	MULTISPECIES: 2-dehydropantoate 2-reductase [Bacteria]	gi|446606710		34 kDa		0.52	1	[]	unknown	7	7	10	4	3	1
848	TRUE	Empty	molybdenum ABC transporter substrate-binding protein [Staphylococcus aureus subsp. aureus NCTC 8325]	gi|88196194		29 kDa		0.4	2	[]	unknown	2	4	3	0	0	0
849	TRUE	Empty	RecName: Full=ATP-dependent protease subunit HslV	gi|122539695		20 kDa		0.19	0.7	[]	unknown	15	11	9	5	1	1
850	TRUE	Empty	imidazolonepropionase [Staphylococcus aureus]	gi|446921507		45 kDa		0.22	0	[]	unknown	2	0	0	0	0	0
851	TRUE	Empty	hypothetical protein SAOUHSC_1307a [Staphylococcus aureus subsp. aureus NCTC 8325]	gi|542123273		8 kDa		0.42	1.4	[]	unknown	8	11	15	5	6	5
852	TRUE	Empty	MULTISPECIES: DNA-3-methyladenine glycosylase [Bacteria]	gi|446923972		21 kDa		0.095	0.4	[]	unknown	9	4	8	5	3	0
853	TRUE	Empty	hypothetical protein SAOUHSC_02434 [Staphylococcus aureus subsp. aureus NCTC 8325]	gi|88196088		67 kDa		0.45	0.7	[]	unknown	3	2	1	0	0	0
854	TRUE	Empty	hypothetical protein SAOUHSC_00015 [Staphylococcus aureus subsp. aureus NCTC 8325]	gi|88193837		74 kDa		0.29	0.5	[]	unknown	4	2	1	0	0	0
855	TRUE	Empty	MULTISPECIES: acetyl-CoA acetyltransferase [Bacteria]	gi|446993420		41 kDa		0.47	0	[]	unknown	1	0	0	1	0	0
856	TRUE	Empty	hypothetical protein SAOUHSC_01812 [Staphylococcus aureus subsp. aureus NCTC 8325]	gi|88195512		35 kDa		0.31	0.7	[]	unknown	7	5	3	4	1	0
857	TRUE	Empty	hypothetical protein SAOUHSC_02876 [Staphylococcus aureus subsp. aureus NCTC 8325]	gi|88196506		43 kDa		0.54	2	[]	unknown	1	2	0	0	0	0
858	TRUE	Empty	succinyl-diaminopimelate desuccinylase [Staphylococcus aureus subsp. aureus NCTC 8325]	gi|88195916		45 kDa		0.56	1.3	[]	unknown	3	4	4	1	1	0
859	TRUE	Empty	hypothetical protein SAOUHSC_01584 [Staphylococcus aureus subsp. aureus NCTC 8325]	gi|88195295		34 kDa	TRUE	0.57	1	[]	unknown	4	4	3	0	1	0
860	TRUE	Empty	MULTISPECIES: signal peptidase II [Bacteria]	gi|447056938		30 kDa		0.28	INF	[]	unknown	0	2	3	2	0	0
861	TRUE	Empty	RecName: Full=Alanine dehydrogenase 2	gi|122539309		40 kDa		0.078	0.5	[]	unknown	12	6	6	4	3	2
862	TRUE	Empty	RecName: Full=Putative sporulation transcription regulator WhiA	gi|122539972		36 kDa		0.53	INF	[]	unknown	0	1	1	1	0	0
863	TRUE	Empty	hypothetical protein SAOUHSC_01727 [Staphylococcus aureus subsp. aureus NCTC 8325]	gi|88195432		42 kDa		0.42	0.9	[]	unknown	7	6	3	2	3	0
864	TRUE	Empty	RecName: Full=tRNA modification GTPase MnmE	gi|122538496		51 kDa		0.32	0.8	[]	unknown	9	7	7	2	0	0
865	TRUE	Empty	hypothetical protein SAOUHSC_00308 [Staphylococcus aureus subsp. aureus NCTC 8325]	gi|88194109		39 kDa		0.65	1	[]	unknown	2	2	2	0	0	0
866	TRUE	Empty	RecName: Full=Superoxide dismutase [Mn/Fe] 2	gi|123003520		23 kDa	TRUE	0.15	2.7	[]	unknown	3	8	20	3	5	5
867	TRUE	Empty	MULTISPECIES: mevalonate kinase [Bacteria]	gi|446119179		33 kDa		0.03	0.3	[]	unknown	10	3	0	2	0	0
868	TRUE	Empty	MULTISPECIES: protein translocase component YidC [Bacteria]	gi|446648456		34 kDa		0.35	3	[]	unknown	1	3	2	0	1	0
869	TRUE	Empty	ParB family chromosome partioning protein [Staphylococcus aureus subsp. aureus NCTC 8325]	gi|88194142		33 kDa		0.72	1	[]	unknown	1	1	1	0	0	0
870	TRUE	Empty	hypothetical protein SAOUHSC_00024 [Staphylococcus aureus subsp. aureus NCTC 8325]	gi|88193845		30 kDa		0.72	1	[]	unknown	1	1	0	0	0	0
871	TRUE	Empty	MULTISPECIES: GTP pyrophosphokinase [Bacteria]	gi|446211281		27 kDa		0.43	1.7	[]	unknown	3	5	7	0	0	0
872	TRUE	Empty	MULTISPECIES: hypothetical protein [Bacteria]	gi|446291867		35 kDa	TRUE	0.41	0.9	[]	unknown	9	8	6	4	2	0
873	TRUE	Empty	ABC transporter ATP-binding protein [Staphylococcus aureus]	gi|446846264		25 kDa		0.54	2	[]	unknown	1	2	1	1	0	0
874	TRUE	Empty	orotate phosphoribosyltransferase [Staphylococcus aureus]	gi|446962995		22 kDa		0.32	0.9	[]	unknown	14	12	13	6	3	0
875	TRUE	Empty	spermidine/putrescine import ATP-binding protein PotA [Staphylococcus aureus]	gi|446355696		41 kDa		0.29	0.5	[]	unknown	4	2	1	3	1	0
876	TRUE	Empty	MULTISPECIES: hypothetical protein [Bacteria]	gi|446372402		51 kDa		0.54	2	[]	unknown	1	2	0	0	0	0
877	TRUE	Empty	MULTISPECIES: zinc ABC transporter ATP-binding protein [Bacteria]	gi|447136652		29 kDa		0.46	0.5	[]	unknown	2	1	1	0	1	0
878	TRUE	Empty	rod shape-determining protein MreC [Staphylococcus aureus subsp. aureus NCTC 8325]	gi|88195460		31 kDa		0.23	0.7	[]	unknown	9	6	6	2	1	0
879	TRUE	Empty	MULTISPECIES: serine dehydratase subunit alpha [Bacteria]	gi|446382566		31 kDa		1	INF	[]	unknown	0	0	0	0	0	0
880	TRUE	Empty	MULTISPECIES: thymidylate kinase [Bacteria]	gi|447194870		23 kDa		0.082	0.4	[]	unknown	8	3	7	4	2	0
881	TRUE	Empty	RecName: Full=Clumping factor A; AltName: Full=Fibrinogen receptor A; AltName: Full=Fibrinogen-binding protein A; Flags: Precursor	gi|114149250 (+1)		96 kDa		0.53	1.2	[]	unknown	11	13	17	1	3	2
882	TRUE	Empty	deoxyribodipyrimidine photolyase [Staphylococcus aureus]	gi|446874793		54 kDa		0.44	0.8	[]	unknown	4	3	0	0	0	0
883	TRUE	Empty	cap5N protein/UDP-glucose 4-epimerase [Staphylococcus aureus subsp. aureus NCTC 8325]	gi|88193940		34 kDa		0.47	0	[]	unknown	1	0	0	0	0	0
884	TRUE	Empty	MULTISPECIES: methionine ABC transporter substrate-binding protein [Bacteria]	gi|446654980		30 kDa		1	INF	[]	unknown	0	0	4	0	0	0
885	TRUE	Empty	MULTISPECIES: nitroreductase [Bacteria]	gi|446345053		21 kDa		0.22	4	[]	unknown	1	4	0	0	2	0
886	TRUE	Empty	capsular polysaccharide biosynthesis protein Cap5B [Staphylococcus aureus subsp. aureus NCTC 8325]	gi|88193928		25 kDa		0.48	1	[]	unknown	11	11	6	5	0	0
887	TRUE	Empty	RecName: Full=Putative glycosyltransferase TagX; AltName: Full=Teichoic acid biosynthesis protein X	gi|83305910		41 kDa		0.4	2	[]	unknown	2	4	2	2	1	0
888	TRUE	Empty	MULTISPECIES: hydrolase TatD [Bacteria]	gi|446827056		29 kDa		0.32	0.8	[]	unknown	8	6	6	4	3	1
889	TRUE	Empty	hypothetical protein SAOUHSC_00756 [Staphylococcus aureus subsp. aureus NCTC 8325]	gi|88194520		42 kDa		0.4	2	[]	unknown	2	4	4	0	0	0
890	TRUE	Empty	MULTISPECIES: methionine import ATP-binding protein MetN 2 [Bacteria]	gi|446493364		38 kDa	TRUE	0.57	1.2	[]	unknown	4	5	4	1	0	0
891	TRUE	Empty	MULTISPECIES: glutathione S-transferase [Bacteria]	gi|446075489		17 kDa		0.43	1.7	[]	unknown	3	5	7	1	2	1
892	TRUE	Empty	MULTISPECIES: hypothetical protein [Bacteria]	gi|446894242		13 kDa		0.45	1.5	[]	unknown	4	6	7	2	1	0
893	TRUE	Empty	haloacid dehalogenase [Staphylococcus aureus]	gi|446942068		22 kDa		0.45	1.5	[]	unknown	4	6	7	3	5	3
894	TRUE	Empty	amino acid transporter [Staphylococcus aureus]	gi|446644207		35 kDa		0.54	2	[]	unknown	1	2	0	0	0	0
895	TRUE	Empty	MULTISPECIES: ABC transporter ATP-binding protein [Bacteria]	gi|446908740		28 kDa		0.31	2	[]	unknown	3	6	6	0	0	0
896	TRUE	Empty	RecName: Full=Histidinol-phosphate aminotransferase; AltName: Full=Imidazole acetol-phosphate transaminase	gi|122540014		40 kDa		0.65	1	[]	unknown	2	2	0	0	0	0
897	TRUE	Empty	MULTISPECIES: LytR family transcriptional regulator [Bacteria]	gi|446753799		35 kDa		0.43	1.3	[]	unknown	9	12	4	1	3	0
898	TRUE	Empty	MULTISPECIES: hypothetical protein [Bacteria]	gi|446414131		17 kDa		0.72	1	[]	unknown	1	1	1	1	1	0
899	TRUE	Empty	cold shock protein [Staphylococcus aureus subsp. aureus NCTC 8325]	gi|88196660		8 kDa	TRUE	0.52	1	[]	unknown	7	7	5	6	3	0
900	TRUE	Empty	delta-haemolysin precurser [Staphylococcus aureus subsp. aureus RN4220]	gi|7239368		5 kDa		0.025	0.1	[]	unknown	7	1	0	0	0	0
901	TRUE	Empty	hypothetical protein SAOUHSC_01717 [Staphylococcus aureus subsp. aureus NCTC 8325]	gi|88195422		36 kDa		0.57	1.2	[]	unknown	5	6	3	3	0	0
902	TRUE	Empty	RecName: Full=L-threonine dehydratase catabolic TdcB; AltName: Full=Threonine deaminase	gi|122539559		37 kDa		0.55	1	[]	unknown	5	5	1	0	0	0
903	TRUE	Empty	hypothetical protein SAOUHSC_01872 [Staphylococcus aureus subsp. aureus NCTC 8325]	gi|88195569		46 kDa		0.46	0.5	[]	unknown	2	1	1	1	1	0
904	TRUE	Empty	RecName: Full=Cell division protein SepF	gi|122539737		21 kDa		0.034	0.4	[]	unknown	14	6	6	4	2	1
905	TRUE	Empty	MULTISPECIES: acetyltransferase [Bacteria]	gi|446963480		33 kDa		0.23	0.6	[]	unknown	8	5	2	2	0	0
906	TRUE	Empty	RecName: Full=Shikimate dehydrogenase (NADP(+)); Short=SDH	gi|122539390		30 kDa		0.56	1.3	[]	unknown	3	4	5	3	2	0
907	TRUE	Empty	MULTISPECIES: chromosome partitioning protein ParB [Bacteria]	gi|446665491		32 kDa		0.082	0.4	[]	unknown	8	3	5	1	2	0
908	TRUE	Empty	alcohol dehydrogenase [Staphylococcus aureus]	gi|446532843		39 kDa	TRUE	0.38	1.5	[]	unknown	6	9	9	1	4	2
909	TRUE	Empty	MULTISPECIES: 2-C-methyl-D-erythritol 4-phosphate cytidylyltransferase [Bacteria]	gi|446561129		27 kDa	TRUE	0.57	1	[]	unknown	4	4	9	4	3	3
910	TRUE	Empty	RecName: Full=Argininosuccinate synthase; AltName: Full=Citrulline--aspartate ligase	gi|119361327		44 kDa		0.46	0.5	[]	unknown	2	1	10	0	0	0
911	TRUE	Empty	glycerophosphoryl diester phosphodiesterase [Staphylococcus aureus subsp. aureus NCTC 8325]	gi|88194820		35 kDa		0.56	1.3	[]	unknown	3	4	3	2	0	0
912	TRUE	Empty	MULTISPECIES: haloacid dehalogenase [Bacteria]	gi|446376929		25 kDa		0.23	1.5	[]	unknown	13	20	15	9	9	3
913	TRUE	Empty	MULTISPECIES: nitric oxide synthase oxygenase [Bacteria]	gi|446820379		42 kDa		0.05	0	[]	unknown	4	0	0	0	0	0
914	TRUE	Empty	MULTISPECIES: N-acetyltransferase [Bacteria]	gi|446940167		30 kDa		0.56	1.3	[]	unknown	3	4	6	0	1	1
915	TRUE	Empty	MULTISPECIES: sodium:proton antiporter [Bacteria]	gi|446324317 (+1)		76 kDa		0.47	0	[]	unknown	1	0	1	0	0	0
916	TRUE	Empty	lactate dehydrogenase [Staphylococcus aureus]	gi|446083503		37 kDa		0.45	1.5	[]	unknown	4	6	6	0	0	0
917	TRUE	Empty	RecName: Full=Alpha-hemolysin; Short=Alpha-HL; AltName: Full=Alpha-toxin; Flags: Precursor	gi|122540475		36 kDa		0.011	0	[]	unknown	6	0	0	0	0	0
918	TRUE	Empty	hypothetical protein SAOUHSC_00774 [Staphylococcus aureus subsp. aureus NCTC 8325]	gi|88194536		26 kDa		1	INF	[]	unknown	0	0	2	0	0	0
919	TRUE	Empty	hypothetical protein SAOUHSC_01348 [Staphylococcus aureus subsp. aureus NCTC 8325]	gi|88195076		18 kDa		0.42	0.9	[]	unknown	7	6	7	3	1	0
920	TRUE	Empty	hypothetical protein SAOUHSC_00979 [Staphylococcus aureus subsp. aureus NCTC 8325]	gi|88194736		21 kDa		0.46	0.5	[]	unknown	2	1	4	2	2	0
921	TRUE	Empty	ABC transporter ATP-binding protein [Staphylococcus aureus]	gi|446914046		35 kDa		0.18	0.4	[]	unknown	5	2	0	1	1	0
922	TRUE	Empty	hypothetical protein SAOUHSC_01966 [Staphylococcus aureus subsp. aureus NCTC 8325]	gi|88195658		48 kDa		0.47	0	[]	unknown	1	0	0	0	0	0
923	TRUE	Empty	MULTISPECIES: lysine decarboxylase [Bacteria]	gi|446743636		21 kDa		1	INF	[]	unknown	0	0	0	0	1	0
924	TRUE	Empty	hypothetical protein SAOUHSC_00023 [Staphylococcus aureus subsp. aureus NCTC 8325]	gi|88193844		30 kDa		0.47	0	[]	unknown	1	0	0	1	0	3
925	TRUE	Empty	RecName: Full=Glucosamine-6-phosphate deaminase; AltName: Full=GlcN6P deaminase; Short=GNPDA; AltName: Full=Glucosamine-6-phosphate isomerase	gi|122540113		28 kDa		0.57	1.1	[]	unknown	10	11	12	2	2	0
926	TRUE	Empty	endonuclease III [Staphylococcus aureus subsp. aureus NCTC 8325]	gi|88195186		25 kDa		0.53	INF	[]	unknown	0	1	0	0	0	0
927	TRUE	Empty	D-3-phosphoglycerate dehydrogenase [Staphylococcus aureus]	gi|446731589		58 kDa		0.55	1	[]	unknown	5	5	6	1	0	0
928	TRUE	Empty	MULTISPECIES: methyltransferase [Bacteria]	gi|445942449		23 kDa		0.12	0.5	[]	unknown	11	6	5	5	2	0
929	TRUE	Empty	RecName: Full=Uncharacterized hydrolase SAOUHSC_01399	gi|122539591		43 kDa		0.14	2	[]	unknown	7	14	8	3	2	0
930	TRUE	Empty	hypothetical protein SAOUHSC_01186 [Staphylococcus aureus subsp. aureus NCTC 8325]	gi|88194925		28 kDa		0.14	0.5	[]	unknown	8	4	6	3	0	0
931	TRUE	Empty	DNA repair protein RecO [Staphylococcus aureus]	gi|446851835		28 kDa		1	INF	[]	unknown	0	0	1	0	0	0
932	TRUE	Empty	MULTISPECIES: iron ABC transporter substrate-binding protein [Bacteria]	gi|446967855		37 kDa		1	INF	[]	unknown	0	0	2	0	0	0
933	TRUE	Empty	hypothetical protein SAOUHSC_02248 [Staphylococcus aureus subsp. aureus NCTC 8325]	gi|88195920		17 kDa		0.47	0	[]	unknown	1	0	1	0	0	0
934	TRUE	Empty	MULTISPECIES: molybdopterin synthase catalytic subunit [Bacteria]	gi|446731244		17 kDa		0.54	1	[]	unknown	6	6	10	2	0	0
935	TRUE	Empty	RecName: Full=Peptide methionine sulfoxide reductase MsrA 2; Short=Protein-methionine-S-oxide reductase 2; AltName: Full=Peptide-methionine (S)-S-oxide reductase 2; Short=Peptide Met(O) reductase 2	gi|59799854		21 kDa		0.43	1.7	[]	unknown	3	5	3	0	0	0
936	TRUE	Empty	MULTISPECIES: 6-phospho 3-hexuloisomerase [Bacteria]	gi|446974338		20 kDa		0.46	1	[]	unknown	14	14	20	4	2	1
937	TRUE	Empty	ABC transporter [Staphylococcus aureus subsp. aureus NCTC 8325]	gi|88194496		38 kDa		0.56	1.3	[]	unknown	3	4	0	0	0	0
938	TRUE	Empty	hypothetical protein SAOUHSC_02472 [Staphylococcus aureus subsp. aureus NCTC 8325]	gi|88196124		44 kDa		0.47	0	[]	unknown	1	0	0	0	0	0
939	TRUE	Empty	MULTISPECIES: dihydroxyacetone kinase subunit DhaK [Bacteria]	gi|446899013		35 kDa		0.36	1.6	[]	unknown	5	8	4	0	0	0
940	TRUE	Empty	RecName: Full=Uncharacterized lipoprotein SAOUHSC_02650; Flags: Precursor	gi|122538777		23 kDa		0.5	1	[]	unknown	9	9	7	2	6	1
941	TRUE	Empty	tRNA dimethylallyltransferase [Staphylococcus aureus]	gi|486199565		36 kDa		0.15	INF	[]	unknown	0	3	1	2	0	0
942	TRUE	Empty	MULTISPECIES: ribonuclease 3 [Bacteria]	gi|445965382		28 kDa		0.43	0.8	[]	unknown	5	4	4	1	0	0
943	TRUE	Empty	hypothetical protein SAOUHSC_00925 [Staphylococcus aureus subsp. aureus NCTC 8325]	gi|88194682		40 kDa		1	INF	[]	unknown	0	0	0	0	1	0
944	TRUE	Empty	RecName: Full=DNA replication and repair protein RecF	gi|122540544		42 kDa		0.4	2	[]	unknown	2	4	2	2	0	0
945	TRUE	Empty	MULTISPECIES: hypothetical protein [Bacteria]	gi|446669341		24 kDa		0.56	1.3	[]	unknown	3	4	4	3	1	0
946	TRUE	Empty	MULTISPECIES: protein-tyrosine phosphatase [Bacteria]	gi|446150811		17 kDa		0.11	0	[]	unknown	3	0	1	2	1	0
947	TRUE	Empty	heptaprenyl diphosphate synthase subunit II [Staphylococcus aureus]	gi|447019215		36 kDa	TRUE	0.54	2	[]	unknown	1	2	1	0	0	0
948	TRUE	Empty	hypothetical protein SAOUHSC_02608 [Staphylococcus aureus subsp. aureus NCTC 8325]	gi|88196250		35 kDa		1	INF	[]	unknown	0	0	0	0	0	0
949	TRUE	Empty	RecName: Full=PTS system glucoside-specific EIICBA component; Includes: RecName: Full=Glucoside permease IIC component; AltName: Full=PTS system glucoside-specific EIIC component; Includes: RecName: Full=Glucoside-specific phosphotransferase enzyme IIB component; AltName: Full=PTS system glucoside-specific EIIB component; Includes: RecName: Full=Glucoside-specific phosphotransferase enzyme IIA co…	gi|122538643		74 kDa	TRUE	0.35	3	[]	unknown	1	3	1	0	0	0
950	TRUE	Empty	dihydrolipoamide dehydrogenase [Staphylococcus aureus subsp. aureus NCTC 8325]	gi|88195325		51 kDa		0.28	1.8	[]	unknown	5	9	6	1	0	0
951	TRUE	Empty	RecName: Full=Oxygen sensor histidine kinase NreB; AltName: Full=Nitrogen regulation protein B	gi|123098002		39 kDa		0.28	INF	[]	unknown	0	2	0	0	0	0
952	TRUE	Empty	hypothetical protein SAOUHSC_00679 [Staphylococcus aureus subsp. aureus NCTC 8325]	gi|88194444		33 kDa		0.45	0.7	[]	unknown	3	2	3	0	2	0
953	TRUE	Empty	sortase [Staphylococcus aureus subsp. aureus NCTC 8325]	gi|88196468		24 kDa		0.44	0.8	[]	unknown	4	3	4	3	2	0
954	TRUE	Empty	MULTISPECIES: 50S ribosomal protein L32 [Bacteria]	gi|446212617		6 kDa	TRUE	0.59	1.1	[]	unknown	7	8	7	6	6	3
955	TRUE	Empty	RecName: Full=Arginine repressor	gi|123003459		17 kDa		0.43	1.3	[]	unknown	9	12	13	8	5	1
956	TRUE	Empty	lactose phosphotransferase system repressor [Staphylococcus aureus subsp. aureus NCTC 8325]	gi|88196108		30 kDa	TRUE	0.54	2	[]	unknown	1	2	2	0	0	0
957	TRUE	Empty	RecName: Full=Urease accessory protein UreF	gi|122540651		26 kDa		0.72	1	[]	unknown	1	1	0	0	0	0
958	TRUE	Empty	RecName: Full=Uncharacterized hydrolase SAOUHSC_02465	gi|122538881		32 kDa		0.2	0.5	[]	unknown	6	3	4	0	0	0
959	TRUE	Empty	hypothetical protein [Staphylococcus aureus]	gi|446088204		31 kDa		0.32	0.8	[]	unknown	9	7	6	3	2	0
960	TRUE	Empty	MULTISPECIES: hypothetical protein [Bacteria]	gi|446570772		13 kDa		0.12	1.9	[]	unknown	10	19	17	4	1	0
961	TRUE	Empty	hypothetical protein SAOUHSC_01254 [Staphylococcus aureus subsp. aureus NCTC 8325]	gi|88194987		27 kDa		0.53	1.2	[]	unknown	11	13	9	10	2	0
962	TRUE	Empty	unknown, partial [Staphylococcus aureus subsp. aureus NCTC 8325]	gi|706920		12 kDa		1	INF	[]	unknown	0	0	0	1	0	1
963	TRUE	Empty	5-nucleotidase family protein [Staphylococcus aureus subsp. aureus NCTC 8325]	gi|88194617		50 kDa		0.72	1	[]	unknown	1	1	0	0	0	0
964	TRUE	Empty	hypothetical protein SAOUHSC_01470 [Staphylococcus aureus subsp. aureus NCTC 8325]	gi|88195187		27 kDa		0.18	0.4	[]	unknown	5	2	3	0	0	0
965	TRUE	Empty	RecName: Full=Phosphopantetheine adenylyltransferase; AltName: Full=Dephospho-CoA pyrophosphorylase; AltName: Full=Pantetheine-phosphate adenylyltransferase; Short=PPAT	gi|122539795		18 kDa		0.22	0	[]	unknown	2	0	2	1	1	0
966	TRUE	Empty	MULTISPECIES: formamidopyrimidine-DNA glycosylase [Bacteria]	gi|447037196		33 kDa		0.6	1	[]	unknown	3	3	1	1	0	0
967	TRUE	Empty	MULTISPECIES: peptide ABC transporter permease [Bacteria]	gi|446752376		40 kDa		0.53	INF	[]	unknown	0	1	0	0	0	0
968	TRUE	Empty	hypothetical protein [Staphylococcus aureus]	gi|446064181		20 kDa	TRUE	0.65	1	[]	unknown	2	2	1	0	0	0
969	TRUE	Empty	MULTISPECIES: DNA-binding protein [Bacteria]	gi|446650077		11 kDa		0.54	2	[]	unknown	1	2	1	0	0	0
970	TRUE	Empty	hypothetical protein SAOUHSC_00821 [Staphylococcus aureus subsp. aureus NCTC 8325]	gi|88194580		11 kDa		0.19	0.7	[]	unknown	14	10	8	5	2	0
971	TRUE	Empty	hypothetical protein SAOUHSC_02812 [Staphylococcus aureus subsp. aureus NCTC 8325]	gi|88196446		16 kDa		0.35	3	[]	unknown	1	3	2	2	2	0
972	TRUE	Empty	hypothetical protein SAOUHSC_02529 [Staphylococcus aureus subsp. aureus NCTC 8325]	gi|88196176		30 kDa	TRUE	0.55	1	[]	unknown	5	5	6	2	1	0
973	TRUE	Empty	RecName: Full=UPF0173 metal-dependent hydrolase SAOUHSC_01815	gi|122539311		25 kDa		0.17	2	[]	unknown	6	12	9	2	4	2
974	TRUE	Empty	hypothetical protein SAOUHSC_02579 [Staphylococcus aureus subsp. aureus NCTC 8325]	gi|88196222		42 kDa		0.72	1	[]	unknown	1	1	2	0	0	0
975	TRUE	Empty	RecName: Full=Dehydrosqualene synthase; AltName: Full=4,4'-diapophytoene synthase; Short=DAP synthase; AltName: Full=Diapophytoene synthase	gi|122538623		34 kDa		0.65	1	[]	unknown	2	2	0	0	0	0
976	TRUE	Empty	MULTISPECIES: diaminohydroxyphosphoribosylaminopyrimidine deaminase [Bacteria]	gi|445999489		39 kDa		0.083	6	[]	unknown	1	6	5	2	2	0
977	TRUE	Empty	RecName: Full=Ribonuclease HIII; Short=RNase HIII	gi|122539781		35 kDa		0.46	0.5	[]	unknown	2	1	1	1	0	0
978	TRUE	Empty	RecName: Full=Peptidyl-tRNA hydrolase; Short=PTH	gi|119391013		22 kDa		0.43	1.7	[]	unknown	3	5	2	0	0	0
979	TRUE	Empty	RecName: Full=Glutamate racemase	gi|122539773		30 kDa		0.53	1.2	[]	unknown	11	13	10	2	0	0
980	TRUE	Empty	RecName: Full=NADPH-dependent oxidoreductase	gi|112823994		29 kDa		0.32	1.6	[]	unknown	7	11	7	1	0	0
981	TRUE	Empty	hypothetical protein [Staphylococcus aureus]	gi|487718436		19 kDa	TRUE	0.6	1	[]	unknown	3	3	3	0	0	0
982	TRUE	Empty	butyryl-CoA dehydrogenase [Staphylococcus aureus]	gi|486201864		39 kDa		0.6	1	[]	unknown	3	3	0	0	0	0
983	TRUE	Empty	RecName: Full=O-acetyltransferase OatA	gi|122538619		69 kDa		0.22	0	[]	unknown	2	0	2	0	0	0
984	TRUE	Empty	hypothetical protein SAOUHSC_01694 [Staphylococcus aureus subsp. aureus NCTC 8325]	gi|88195400		28 kDa		0.72	1	[]	unknown	1	1	0	0	0	0
985	TRUE	Empty	MULTISPECIES: capsular polysaccharide biosynthesis protein Cap8F [Bacteria]	gi|446951037		42 kDa		0.54	1	[]	unknown	6	6	3	1	1	0
986	TRUE	Empty	Nif3-like dinuclear metal center hexameric protein [Staphylococcus aureus]	gi|446606585		41 kDa		0.57	1	[]	unknown	4	4	5	4	5	3
987	TRUE	Empty	hypothetical protein SAOUHSC_00638 [Staphylococcus aureus subsp. aureus NCTC 8325]	gi|88194405		25 kDa		0.49	1.3	[]	unknown	7	9	8	3	3	0
988	TRUE	Empty	ABC transporter substrate-binding protein [Staphylococcus aureus]	gi|446748265		30 kDa		0.43	0.8	[]	unknown	6	5	1	0	0	0
989	TRUE	Empty	MULTISPECIES: molybdopterin biosynthesis protein MoeB [Bacteria]	gi|445999074		38 kDa		0.72	1	[]	unknown	1	1	0	0	0	0
990	TRUE	Empty	RecName: Full=50S ribosomal protein L28	gi|122539716		7 kDa		1	INF	[]	unknown	0	0	0	0	0	0
991	TRUE	Empty	MULTISPECIES: hypothetical protein [Bacteria]	gi|446320817		4 kDa		< 0.00010	0.2	1mM Cu low, TSB high	unknown	40	6	1	2	0	0
992	TRUE	Empty	pyridine nucleotide-disulfide oxidoreductase [Staphylococcus aureus]	gi|446955762		45 kDa		1	INF	[]	unknown	0	0	1	0	0	0
993	TRUE	Empty	RecName: Full=Endoribonuclease YbeY	gi|122539405		18 kDa		0.31	0.7	[]	unknown	6	4	2	2	0	0
994	TRUE	Empty	hypothetical protein SAOUHSC_00877 [Staphylococcus aureus subsp. aureus NCTC 8325]	gi|88194634		12 kDa		0.51	1	[]	unknown	8	8	8	4	5	3
995	TRUE	Empty	hypothetical protein SAOUHSC_00302 [Staphylococcus aureus subsp. aureus NCTC 8325]	gi|88194103		45 kDa		0.53	INF	[]	unknown	0	1	0	0	0	0
996	TRUE	Empty	MULTISPECIES: ferric uptake regulation protein [Bacteria]	gi|447018004		16 kDa		0.42	0.9	[]	unknown	7	6	5	3	0	0
997	TRUE	Empty	hypothetical protein SAOUHSC_00890 [Staphylococcus aureus subsp. aureus NCTC 8325]	gi|88194647		15 kDa		0.48	1.3	[]	unknown	6	8	3	3	3	1
998	TRUE	Empty	RecName: Full=Protein FdhD homolog	gi|122538834		29 kDa		0.35	3	[]	unknown	1	3	1	0	0	0
999	TRUE	Empty	MULTISPECIES: single-stranded DNA-binding protein [Bacteria]	gi|446857543		19 kDa		0.38	1.5	[]	unknown	6	9	10	8	6	3
1000	TRUE	Empty	folylpolyglutamate synthase/dihydrofolate synthase [Staphylococcus aureus subsp. aureus NCTC 8325]	gi|88195467		48 kDa		0.45	1.5	[]	unknown	4	6	3	2	1	0
1001	TRUE	Empty	RecName: Full=4-hydroxy-tetrahydrodipicolinate synthase; Short=HTPA synthase	gi|14547963		33 kDa		0.24	1.6	[]	unknown	10	16	15	4	2	0
1002	TRUE	Empty	MULTISPECIES: RpiR family transcriptional regulator [Bacteria]	gi|446590036		30 kDa		0.35	3	[]	unknown	1	3	2	1	0	0
1003	TRUE	Empty	MULTISPECIES: RpiR family transcriptional regulator [Bacteria]	gi|446400137		30 kDa		0.47	0	[]	unknown	1	0	1	0	0	0
1004	TRUE	Empty	RecName: Full=Epimerase family protein SAOUHSC_00792	gi|122539971		34 kDa		0.51	1	[]	unknown	8	8	6	2	2	0
1005	TRUE	Empty	MULTISPECIES: monooxygenase IsdI [Bacteria]	gi|446402748		13 kDa		0.34	1.8	[]	unknown	4	7	8	1	0	0
1006	TRUE	Empty	16S ribosomal RNA methyltransferase RsmE [Staphylococcus aureus subsp. aureus NCTC 8325]	gi|88195386		28 kDa		0.59	1.1	[]	unknown	8	9	9	4	2	0
1007	TRUE	Empty	hydrolase alpha/beta fold domain-containing protein [Staphylococcus aureus subsp. aureus NCTC 8325]	gi|88195011		35 kDa		0.47	0	[]	unknown	1	0	0	0	0	0
1008	TRUE	Empty	UDP-N-acetylglucosamine 2-epimerase [Staphylococcus aureus subsp. aureus NCTC 8325]	gi|88193942		43 kDa		0.29	0.5	[]	unknown	4	2	2	0	0	0
1009	TRUE	Empty	MULTISPECIES: hypothetical protein [Bacteria]	gi|446143083		11 kDa		0.54	2	[]	unknown	1	2	2	0	1	2
1010	TRUE	Empty	sensor histidine kinase [Staphylococcus aureus subsp. aureus NCTC 8325]	gi|88195672		42 kDa	TRUE	0.53	INF	[]	unknown	0	1	0	0	0	0
1011	TRUE	Empty	tributyrin esterase [Staphylococcus aureus subsp. aureus NCTC 8325]	gi|88196584		29 kDa		0.46	0.5	[]	unknown	2	1	1	1	0	0
1012	TRUE	Empty	NUDIX domain-containing protein [Staphylococcus aureus subsp. aureus NCTC 8325]	gi|88195304		20 kDa		0.57	1.2	[]	unknown	5	6	6	5	5	1
1013	TRUE	Empty	MULTISPECIES: hypothetical protein [Bacteria]	gi|446748563		21 kDa		0.48	1.3	[]	unknown	6	8	5	6	7	0
1014	TRUE	Empty	RecName: Full=Peptide methionine sulfoxide reductase MsrA 1; Short=Protein-methionine-S-oxide reductase 1; AltName: Full=Peptide-methionine (S)-S-oxide reductase 1; Short=Peptide Met(O) reductase 1	gi|60392790		20 kDa		0.57	1	[]	unknown	4	4	3	2	0	0
1015	TRUE	Empty	hypothetical protein SAOUHSC_00706 [Staphylococcus aureus subsp. aureus NCTC 8325]	gi|88194471		28 kDa		0.57	1.2	[]	unknown	4	5	3	0	0	0
1016	TRUE	Empty	MULTISPECIES: hypothetical protein [Bacteria]	gi|447088107		12 kDa		0.32	0.8	[]	unknown	9	7	6	9	8	1
1017	TRUE	Empty	RecName: Full=Adapter protein MecA	gi|122540454		28 kDa		0.35	3	[]	unknown	1	3	4	1	0	1
1018	TRUE	Empty	MULTISPECIES: hypothetical protein [Bacteria]	gi|446578320		11 kDa		0.32	0.8	[]	unknown	12	10	14	7	5	0
1019	TRUE	Empty	signal peptidase IB [Staphylococcus aureus]	gi|446634140		22 kDa	TRUE	0.57	1.2	[]	unknown	5	6	3	3	0	0
1020	TRUE	Empty	sodium ABC transporter ATP-binding protein [Staphylococcus aureus]	gi|446446980		34 kDa	TRUE	0.53	INF	[]	unknown	0	1	1	0	0	0
1021	TRUE	Empty	MULTISPECIES: hypothetical protein [Bacteria]	gi|446332865		11 kDa		0.43	1.7	[]	unknown	3	5	9	6	5	2
1022	TRUE	Empty	hypothetical protein SAOUHSC_00301 [Staphylococcus aureus subsp. aureus NCTC 8325]	gi|88194102		31 kDa		0.43	0.8	[]	unknown	6	5	6	3	0	0
1023	TRUE	Empty	MULTISPECIES: RpiR family transcriptional regulator [Bacteria]	gi|445995340		33 kDa	TRUE	0.38	1.5	[]	unknown	6	9	4	2	0	0
1024	TRUE	Empty	MULTISPECIES: heat-shock protein Hsp20 [Bacteria]	gi|487709112		17 kDa	TRUE	0.43	0.8	[]	unknown	6	5	8	1	0	0
1025	TRUE	Empty	MULTISPECIES: biofilm operon icaADBC HTH-type negative transcriptional regulator IcaR [Bacteria]	gi|446575915		22 kDa		0.34	1.8	[]	unknown	4	7	7	3	2	0
1026	TRUE	Empty	RecName: Full=4-hydroxy-tetrahydrodipicolinate reductase; Short=HTPA reductase	gi|110282958		27 kDa	TRUE	0.43	1.7	[]	unknown	3	5	3	0	0	0
1027	TRUE	Empty	conserved hypothetical protein [Staphylococcus aureus subsp. aureus NCTC 8325]	gi|87203759		32 kDa		0.31	0.7	[]	unknown	6	4	3	0	0	0
1028	TRUE	Empty	hypothetical protein SAOUHSC_00410 [Staphylococcus aureus subsp. aureus NCTC 8325]	gi|88194204		45 kDa		0.55	1.5	[]	unknown	2	3	2	0	0	0
1029	TRUE	Empty	RecName: Full=Transcriptional regulator CtsR	gi|122540136		18 kDa		0.45	0.7	[]	unknown	3	2	1	0	0	0
1030	TRUE	Empty	RecName: Full=Conserved virulence factor C	gi|123098039		43 kDa		0.28	INF	[]	unknown	0	2	0	1	0	0
1031	TRUE	Empty	cytidine deaminase [Staphylococcus aureus subsp. aureus NCTC 8325]	gi|88195377		15 kDa		0.56	1.3	[]	unknown	3	4	6	6	3	0
1032	TRUE	Empty	hypothetical protein SAOUHSC_01706 [Staphylococcus aureus subsp. aureus NCTC 8325]	gi|88195412		48 kDa		0.47	0	[]	unknown	1	0	0	0	0	0
1033	TRUE	Empty	MULTISPECIES: hypothetical protein [Bacteria]	gi|446673861		33 kDa		0.47	0	[]	unknown	1	0	1	0	0	1
1034	TRUE	Empty	MULTISPECIES: gamma-hemolysin component A [Bacteria]	gi|446517173-DECOY		?	TRUE	1	INF	[]	unknown	0	0	0	2	0	1
1035	TRUE	Empty	hypothetical protein SAOUHSC_00690 [Staphylococcus aureus subsp. aureus NCTC 8325]	gi|88194455		27 kDa		0.57	1	[]	unknown	4	4	1	1	1	0
1036	TRUE	Empty	RecName: Full=Staphopain B; AltName: Full=Staphylococcal cysteine proteinase B; AltName: Full=Staphylopain B; Flags: Precursor	gi|112824002		45 kDa		0.14	5	[]	unknown	1	5	2	0	0	0
1037	TRUE	Empty	RecName: Full=30S ribosomal protein S21	gi|119367317		7 kDa		0.55	1.5	[]	unknown	2	3	1	0	1	0
1038	TRUE	Empty	ABC transporter ATP-binding protein [Staphylococcus aureus]	gi|446131710		32 kDa		0.55	1.5	[]	unknown	2	3	2	1	0	0
1039	TRUE	Empty	siderophore biosynthesis protein SbnF [Staphylococcus aureus]	gi|446999637		69 kDa		1	INF	[]	unknown	0	0	4	0	0	0
1040	TRUE	Empty	MULTISPECIES: allophanate hydrolase [Bacteria]	gi|446631346		27 kDa		0.43	0.8	[]	unknown	5	4	6	4	0	0
1041	TRUE	Empty	hypothetical protein SAOUHSC_02373 [Staphylococcus aureus subsp. aureus NCTC 8325]	gi|88196036		46 kDa		0.53	INF	[]	unknown	0	1	0	0	0	0
1042	TRUE	Empty	RecName: Full=Gamma-hemolysin component C; AltName: Full=Leukocidin s subunit; Flags: Precursor	gi|122538737		36 kDa	TRUE	0.47	0	[]	unknown	1	0	1	0	0	0
1043	TRUE	Empty	RecName: Full=UPF0348 protein SAOUHSC_01076	gi|122539794		43 kDa		0.54	2	[]	unknown	1	2	3	1	0	0
1044	TRUE	Empty	RecName: Full=D-aminoacyl-tRNA deacylase; AltName: Full=D-tyrosyl-tRNA(Tyr) deacylase	gi|146325658		17 kDa		0.57	1.2	[]	unknown	5	6	6	3	3	0
1045	TRUE	Empty	RecName: Full=Probable cell wall amidase LytH; Flags: Precursor	gi|110279036		33 kDa		0.46	0.5	[]	unknown	2	1	1	0	0	0
1046	TRUE	Empty	hypothetical protein SAOUHSC_01468 [Staphylococcus aureus subsp. aureus NCTC 8325]	gi|88195185		14 kDa		0.65	1	[]	unknown	2	2	4	0	1	0
1047	TRUE	Empty	MULTISPECIES: hypothetical protein [Bacteria]	gi|447171683		36 kDa		0.49	1.3	[]	unknown	7	9	6	4	0	0
1048	TRUE	Empty	Holliday junction-specific endonuclease [Staphylococcus aureus subsp. aureus NCTC 8325]	gi|88195183		26 kDa	TRUE	0.53	INF	[]	unknown	0	1	0	0	0	0
1049	TRUE	Empty	RecName: Full=ATP synthase subunit b; AltName: Full=ATP synthase F(0) sector subunit b; AltName: Full=ATPase subunit I; AltName: Full=F-type ATPase subunit b; Short=F-ATPase subunit b	gi|122540612		20 kDa		0.42	0.9	[]	unknown	7	6	6	4	2	0
1050	TRUE	Empty	hypothetical protein SAOUHSC_02568 [Staphylococcus aureus subsp. aureus NCTC 8325]	gi|88196212		13 kDa		0.29	0.5	[]	unknown	4	2	1	0	2	2
1051	TRUE	Empty	RecName: Full=Teichoic acids export ATP-binding protein TagH	gi|123291878		30 kDa		0.55	1	[]	unknown	5	5	4	2	1	0
1052	TRUE	Empty	hypothetical protein SAOUHSC_01832 [Staphylococcus aureus subsp. aureus NCTC 8325]	gi|88195532		43 kDa		0.58	1.2	[]	unknown	6	7	10	1	0	0
1053	TRUE	Empty	aldose 1-epimerase [Staphylococcus aureus subsp. aureus NCTC 8325]	gi|88196256		39 kDa		0.11	0	[]	unknown	3	0	2	0	2	0
1054	TRUE	Empty	RecName: Full=Nuclease SbcCD subunit D	gi|122539624		43 kDa		0.54	2	[]	unknown	1	2	1	1	0	0
1055	TRUE	Empty	arginase [Staphylococcus aureus subsp. aureus NCTC 8325]	gi|3892892 (+1)		33 kDa		0.29	0.5	[]	unknown	4	2	2	0	0	0
1056	TRUE	Empty	hypothetical protein SAOUHSC_01830 [Staphylococcus aureus subsp. aureus NCTC 8325]	gi|88195530		28 kDa		0.35	3	[]	unknown	1	3	2	0	0	0
1057	TRUE	Empty	RecName: Full=LexA repressor	gi|123291804		23 kDa		0.4	2	[]	unknown	2	4	2	1	1	0
1058	TRUE	Empty	MULTISPECIES: hypothetical protein [Bacteria]	gi|446918031		16 kDa		0.52	1	[]	unknown	7	7	7	6	8	2
1059	TRUE	Empty	MULTISPECIES: hypothetical protein [Bacteria]	gi|446788368		25 kDa		0.54	2	[]	unknown	1	2	1	0	0	0
1060	TRUE	Empty	MULTISPECIES: hypothetical protein [Bacteria]	gi|446704633		12 kDa		0.21	2	[]	unknown	5	10	8	5	4	1
1061	TRUE	Empty	RecName: Full=HTH-type transcriptional regulator SarX; AltName: Full=Staphylococcal accessory regulator X	gi|118597364		14 kDa	TRUE	0.58	1.1	[]	unknown	9	10	9	0	0	0
1062	TRUE	Empty	hypothetical protein SAOUHSC_00057 [Staphylococcus aureus subsp. aureus NCTC 8325]	gi|88193877		43 kDa		0.42	0.9	[]	unknown	7	6	5	0	1	0
1063	TRUE	Empty	MULTISPECIES: acyl-CoA hydrolase [Bacteria]	gi|446106528		20 kDa		0.6	1	[]	unknown	3	3	4	0	0	0
1064	TRUE	Empty	RecName: Full=Protein-arginine kinase activator protein	gi|857215852		22 kDa		0.46	0.5	[]	unknown	2	1	0	2	1	0
1065	TRUE	Empty	MULTISPECIES: molybdenum cofactor biosynthesis protein B [Bacteria]	gi|446425965		19 kDa		0.43	0.8	[]	unknown	6	5	9	4	3	0
1066	TRUE	Empty	conserved hypothetical protein [Staphylococcus aureus subsp. aureus NCTC 8325]	gi|87201637		26 kDa	TRUE	0.45	0.7	[]	unknown	3	2	2	2	1	1
1067	TRUE	Empty	RecName: Full=UPF0413 protein SAOUHSC_00938	gi|123003517		31 kDa		0.15	INF	[]	unknown	0	3	3	1	0	0
1068	TRUE	Empty	RecName: Full=HTH-type transcriptional regulator SarZ; AltName: Full=Staphylococcal accessory regulator Z	gi|123003423		17 kDa		0.49	1.3	[]	unknown	7	9	7	1	1	0
1069	TRUE	Empty	hypothetical protein SAOUHSC_00695 [Staphylococcus aureus subsp. aureus NCTC 8325]	gi|88194460		35 kDa		0.27	2.5	[]	unknown	2	5	4	0	0	0
1070	TRUE	Empty	MULTISPECIES: hypothetical protein [Bacteria]	gi|447009488		25 kDa		0.22	2.3	[]	unknown	3	7	6	1	1	0
1071	TRUE	Empty	MULTISPECIES: thioredoxin [Bacteria]	gi|446988545		11 kDa		0.42	0.9	[]	unknown	7	6	6	5	0	0
1072	TRUE	Empty	ribosomal protein L11 methyltransferase [Staphylococcus aureus]	gi|447027355		36 kDa		0.6	1	[]	unknown	3	3	1	0	0	0
1073	TRUE	Empty	hypothetical protein SAOUHSC_00605 [Staphylococcus aureus subsp. aureus NCTC 8325]	gi|88194375		18 kDa		0.4	2	[]	unknown	2	4	2	0	0	0
1074	TRUE	Empty	DNA polymerase III subunit delta' [Staphylococcus aureus]	gi|446266482		36 kDa	TRUE	0.45	0.7	[]	unknown	3	2	3	0	0	0
1075	TRUE	Empty	hypothetical protein SAOUHSC_01761 [Staphylococcus aureus subsp. aureus NCTC 8325]	gi|88195462		18 kDa		0.55	1.5	[]	unknown	2	3	0	0	0	0
1076	TRUE	Empty	MULTISPECIES: carboxylesterase [Bacteria]	gi|447143557		27 kDa		0.46	0.5	[]	unknown	2	1	2	0	0	0
1077	TRUE	Empty	hypothetical protein SAOUHSC_00717 [Staphylococcus aureus subsp. aureus NCTC 8325]	gi|88194482		16 kDa		0.18	0.7	[]	unknown	12	8	2	4	0	0
1078	TRUE	Empty	hydrolase in agr operon [Staphylococcus aureus]	gi|446790704		30 kDa		0.65	1	[]	unknown	2	2	4	1	3	1
1079	TRUE	Empty	RecName: Full=NAD-dependent protein deacetylase; AltName: Full=Regulatory protein SIR2 homolog	gi|38257817		27 kDa	TRUE	0.72	1	[]	unknown	1	1	0	0	0	0
1080	TRUE	Empty	RecName: Full=Ribonuclease Z; Short=RNase Z; AltName: Full=tRNA 3 endonuclease; AltName: Full=tRNase Z	gi|122539452		35 kDa		0.55	1.5	[]	unknown	2	3	3	4	1	0
1081	TRUE	Empty	MULTISPECIES: phosphoglycerate mutase [Bacteria]	gi|447063437		22 kDa		0.57	1	[]	unknown	4	4	2	0	0	0
1082	TRUE	Empty	ATP-dependent DNA helicase RecQ [Staphylococcus aureus subsp. aureus NCTC 8325]	gi|88195218		53 kDa		0.53	INF	[]	unknown	0	1	0	0	0	0
1083	TRUE	Empty	deoxyribose-phosphate aldolase 1 [Staphylococcus aureus]	gi|446589923		23 kDa	TRUE	0.0013	0.6	[]	unknown	60	35	44	24	20	10
1084	TRUE	Empty	MULTISPECIES: urease accessory protein UreE [Bacteria]	gi|446557243		17 kDa		0.52	1	[]	unknown	7	7	5	1	2	0
1085	TRUE	Empty	RecName: Full=1-phosphatidylinositol phosphodiesterase; AltName: Full=Phosphatidylinositol diacylglycerol-lyase; AltName: Full=Phosphatidylinositol-specific phospholipase C; Short=PI-PLC; Flags: Precursor	gi|122540421		37 kDa		0.53	INF	[]	unknown	0	1	0	0	0	0
1086	TRUE	Empty	MULTISPECIES: hypothetical protein [Bacteria]	gi|446530783		33 kDa		0.53	INF	[]	unknown	0	1	1	1	0	0
1087	TRUE	Empty	MULTISPECIES: membrane protein [Bacteria]	gi|446383128		40 kDa		1	INF	[]	unknown	0	0	0	1	0	0
1088	TRUE	Empty	tRNA (guanine-N(7)-)-methyltransferase [Staphylococcus aureus subsp. aureus NCTC 8325]	gi|88195562		25 kDa		0.44	0.8	[]	unknown	4	3	4	1	0	0
1089	TRUE	Empty	MULTISPECIES: alpha/beta hydrolase [Bacteria]	gi|446285112		31 kDa		0.5	1	[]	unknown	9	9	8	2	2	0
1090	TRUE	Empty	hypothetical protein SAOUHSC_01661 [Staphylococcus aureus subsp. aureus NCTC 8325]	gi|88195368		26 kDa		0.43	0.8	[]	unknown	5	4	5	6	5	0
1091	TRUE	Empty	MULTISPECIES: TetR family transcriptional regulator [Bacteria]	gi|446587892		22 kDa		0.28	INF	[]	unknown	0	2	0	0	1	0
1092	TRUE	Empty	MULTISPECIES: thermonuclease [Bacteria]	gi|446764095		20 kDa		1	INF	[]	unknown	0	0	0	0	0	0
1093	TRUE	Empty	hypothetical protein SAOUHSC_01958 [Staphylococcus aureus subsp. aureus NCTC 8325]	gi|88195651		21 kDa		0.18	0.4	[]	unknown	5	2	4	1	2	0
1094	TRUE	Empty	hypothetical protein SAOUHSC_02584 [Staphylococcus aureus subsp. aureus NCTC 8325]	gi|88196227		30 kDa		0.54	2	[]	unknown	1	2	2	1	0	0
1095	TRUE	Empty	dihydrolipoamide dehydrogenase [Staphylococcus aureus subsp. aureus NCTC 8325]	gi|88195325-DECOY		?		0.47	0	[]	unknown	1	0	0	0	0	0
1096	TRUE	Empty	MULTISPECIES: 50S ribosomal protein L7ae [Bacteria]	gi|445942998		12 kDa		0.65	1	[]	unknown	2	2	4	3	0	0
1097	TRUE	Empty	competence protein ComK [Staphylococcus aureus]	gi|446209416		23 kDa	TRUE	0.65	1	[]	unknown	2	2	0	0	0	0
1098	TRUE	Empty	MULTISPECIES: hypothetical protein [Bacteria]	gi|446649982		13 kDa		0.72	1	[]	unknown	1	1	0	0	0	0
1099	TRUE	Empty	MULTISPECIES: hypothetical protein [Bacteria]	gi|447088121		11 kDa		0.46	1.4	[]	unknown	5	7	3	2	2	0
1100	TRUE	Empty	glycerol 3-phosphate cytidyltransferase [Staphylococcus aureus subsp. aureus NCTC 8325]	gi|1262138		16 kDa	TRUE	0.47	0	[]	unknown	1	0	0	0	0	0
1101	TRUE	Empty	hypothetical protein [Staphylococcus aureus]	gi|446129990		17 kDa		0.4	2	[]	unknown	2	4	2	0	0	0
1102	TRUE	Empty	RecName: Full=Segregation and condensation protein B	gi|122539459		20 kDa		0.56	1.3	[]	unknown	3	4	2	3	1	0
1103	TRUE	Empty	MULTISPECIES: hypothetical protein [Bacteria]	gi|446675563		7 kDa	TRUE	0.31	0.7	[]	unknown	6	4	3	1	1	1
1104	TRUE	Empty	MULTISPECIES: segregation and condensation protein A [Bacteria]	gi|446195516		29 kDa		0.54	2	[]	unknown	1	2	1	0	0	0
1105	TRUE	Empty	acetyl-CoA carboxylase biotin carboxylase [Staphylococcus aureus subsp. aureus NCTC 8325]	gi|88195415		50 kDa		0.53	INF	[]	unknown	0	1	0	0	0	0
1106	TRUE	Empty	MULTISPECIES: transcriptional regulator [Bacteria]	gi|446576684		37 kDa		0.65	1	[]	unknown	2	2	0	0	0	0
1107	TRUE	Empty	MULTISPECIES: hypothetical protein [Bacteria]	gi|446061077		11 kDa		0.47	0	[]	unknown	1	0	0	0	0	0
1108	TRUE	Empty	MULTISPECIES: hypothetical protein [Bacteria]	gi|446137035		31 kDa		0.55	1.5	[]	unknown	2	3	2	0	0	0
1109	TRUE	Empty	RecName: Full=50S ribosomal protein L36	gi|122538865		4 kDa		0.41	0.9	[]	unknown	8	7	5	3	1	0
1110	TRUE	Empty	RecName: Full=Ribosome maturation factor RimP	gi|122540592		18 kDa		0.2	0.5	[]	unknown	6	3	3	4	1	0
1111	TRUE	Empty	RecName: Full=Transcriptional regulator MraZ	gi|122539745		17 kDa		0.46	0.5	[]	unknown	2	1	2	0	0	0
1112	TRUE	Empty	RecName: Full=HTH-type transcriptional regulator rot; AltName: Full=Repressor of toxins	gi|110825743		19 kDa		0.65	1	[]	unknown	2	2	2	2	2	2
1113	TRUE	Empty	fructose specific permease [Staphylococcus aureus subsp. aureus NCTC 8325]	gi|88194473		69 kDa		0.43	0.8	[]	unknown	5	4	2	0	0	0
1114	TRUE	Empty	conserved hypothetical protein [Staphylococcus aureus subsp. aureus NCTC 8325]	gi|87202698		13 kDa	TRUE	0.52	1	[]	unknown	7	7	4	3	1	2
1115	TRUE	Empty	MULTISPECIES: nicotinate-nucleotide adenylyltransferase [Bacteria]	gi|446647816		22 kDa		0.53	INF	[]	unknown	0	1	1	0	0	0
1116	TRUE	Empty	hypothetical protein SAOUHSC_01650 [Staphylococcus aureus subsp. aureus NCTC 8325]	gi|88195358		21 kDa		1	INF	[]	unknown	0	0	1	0	0	0
1117	TRUE	Empty	cardiolipin synthase [Staphylococcus aureus]	gi|446493695		57 kDa	TRUE	0.53	INF	[]	unknown	0	1	0	0	0	0
1118	TRUE	Empty	MULTISPECIES: exodeoxyribonuclease 7 small subunit [Bacteria]	gi|446082010		9 kDa		0.29	0.5	[]	unknown	4	2	2	2	1	0
1119	TRUE	Empty	MULTISPECIES: arginine ABC transporter ATP-binding protein [Bacteria]	gi|446538115		27 kDa		0.3	0.6	[]	unknown	5	3	6	0	0	0
1120	TRUE	Empty	hypothetical protein SAOUHSC_01188 [Staphylococcus aureus subsp. aureus NCTC 8325]	gi|161353527		34 kDa	TRUE	0.3	0.6	[]	unknown	5	3	3	0	0	0
1121	TRUE	Empty	hypothetical protein SAOUHSC_00367 [Staphylococcus aureus subsp. aureus NCTC 8325]	gi|88194165		49 kDa		0.27	2.5	[]	unknown	2	5	2	0	0	0
1122	TRUE	Empty	MULTISPECIES: deoxycytidylate deaminase [Bacteria]	gi|446361838		17 kDa		0.6	1	[]	unknown	3	3	2	2	0	0
1123	TRUE	Empty	hypothetical protein SAOUHSC_00269 [Staphylococcus aureus subsp. aureus NCTC 8325]	gi|88194074		20 kDa	TRUE	0.24	0.7	[]	unknown	11	8	7	4	1	1
1124	TRUE	Empty	RecName: Full=Putative lipid kinase SAOUHSC_00736	gi|122540011		34 kDa		0.59	1.1	[]	unknown	7	8	9	2	2	0
1125	TRUE	Empty	RecName: Full=UPF0754 membrane protein SAOUHSC_01978	gi|122539211		43 kDa		0.28	INF	[]	unknown	0	2	0	0	0	0
1126	TRUE	Empty	hypothetical protein SAOUHSC_00306 [Staphylococcus aureus subsp. aureus NCTC 8325]	gi|88194107		30 kDa		1	INF	[]	unknown	0	0	1	0	0	0
1127	TRUE	Empty	hypothetical protein SAOUHSC_00806 [Staphylococcus aureus subsp. aureus NCTC 8325]	gi|88194566		13 kDa		0.51	1	[]	unknown	8	8	9	1	4	0
1128	TRUE	Empty	MULTISPECIES: iron transporter [Bacteria]	gi|446032748		27 kDa		1	INF	[]	unknown	0	0	1	0	0	0
1129	TRUE	Empty	hypothetical protein SAOUHSC_01180 [Staphylococcus aureus subsp. aureus NCTC 8325]	gi|88194919		36 kDa		0.53	INF	[]	unknown	0	1	0	0	0	0
1130	TRUE	Empty	RecName: Full=Response regulator protein GraR; AltName: Full=Glycopeptide resistance-associated protein R	gi|122540052		26 kDa		0.4	2	[]	unknown	2	4	1	1	0	0
1131	TRUE	Empty	RecName: Full=Transcriptional repressor NrdR	gi|119372233		18 kDa		1	INF	[]	unknown	0	0	0	0	0	0
1132	TRUE	Empty	MULTISPECIES: hypothetical protein [Bacteria]	gi|446306316		9 kDa		0.54	2	[]	unknown	1	2	2	0	0	0
1133	TRUE	Empty	MULTISPECIES: glyceraldehyde-3-phosphate dehydrogenase [Bacteria]	gi|446028286		37 kDa	TRUE	0.086	0.2	[]	unknown	5	1	1	0	0	0
1134	TRUE	Empty	hypothetical protein SAOUHSC_00696 [Staphylococcus aureus subsp. aureus NCTC 8325]	gi|88194461		35 kDa		0.47	0	[]	unknown	1	0	1	2	1	0
1135	TRUE	Empty	MULTISPECIES: permease [Bacteria]	gi|446081895		51 kDa		0.47	0	[]	unknown	1	0	0	0	0	0
1136	TRUE	Empty	MULTISPECIES: LysR family transcriptional regulator [Bacteria]	gi|446273906		33 kDa		0.11	0	[]	unknown	3	0	4	1	0	0
1137	TRUE	Empty	hypothetical protein [Staphylococcus aureus]	gi|445959220		46 kDa		0.54	1	[]	unknown	6	6	6	1	1	0
1138	TRUE	Empty	hypothetical protein SAOUHSC_02631 [Staphylococcus aureus subsp. aureus NCTC 8325]	gi|88196272		22 kDa		0.31	0.7	[]	unknown	6	4	1	1	1	0
1139	TRUE	Empty	MULTISPECIES: hypothetical protein [Bacteria]	gi|446173398		22 kDa		0.22	0	[]	unknown	2	0	2	1	1	0
1140	TRUE	Empty	MULTISPECIES: acetyltransferase [Bacteria]	gi|447090572		20 kDa		0.57	1	[]	unknown	4	4	4	0	2	0
1141	TRUE	Empty	MULTISPECIES: N-acetylmannosaminyltransferase [Bacteria]	gi|446137533		29 kDa		0.72	1	[]	unknown	1	1	2	1	1	0
1142	TRUE	Empty	MULTISPECIES: MarR family transcriptional regulator [Bacteria]	gi|446028330		18 kDa		0.55	1.5	[]	unknown	2	3	4	0	0	0
1143	TRUE	Empty	hypothetical protein SAOUHSC_02912 [Staphylococcus aureus subsp. aureus NCTC 8325]	gi|88196540		17 kDa		0.22	0	[]	unknown	2	0	2	0	0	0
1144	TRUE	Empty	MULTISPECIES: rhodanese [Bacteria]	gi|447199315		15 kDa		0.35	3	[]	unknown	1	3	2	1	1	0
1145	TRUE	Empty	RecName: Full=Type II pantothenate kinase; AltName: Full=PanK-II; AltName: Full=Pantothenic acid kinase	gi|118572233		29 kDa		0.6	1	[]	unknown	3	3	3	2	2	0
1146	TRUE	Empty	RecName: Full=Acyl carrier protein; Short=ACP	gi|123003476		9 kDa		0.19	0.7	[]	unknown	14	10	13	0	1	0
1147	TRUE	Empty	MULTISPECIES: ABC transporter ATP-binding protein [Bacteria]	gi|446846504		28 kDa		0.53	INF	[]	unknown	0	1	0	0	0	0
1148	TRUE	Empty	monofunctional glycosyltransferase [Staphylococcus aureus]	gi|446753124		31 kDa		0.54	2	[]	unknown	1	2	1	0	0	0
1149	TRUE	Empty	MULTISPECIES: iron-dicitrate ABC transporter ATP-binding protein [Bacteria]	gi|447003553		29 kDa		0.72	1	[]	unknown	1	1	5	0	0	0
1150	TRUE	Empty	hypothetical protein SAOUHSC_02553 [Staphylococcus aureus subsp. aureus NCTC 8325]	gi|88196198		35 kDa		0.31	0.7	[]	unknown	6	4	3	2	1	0
1151	TRUE	Empty	RecName: Full=tRNA N6-adenosine threonylcarbamoyltransferase; AltName: Full=N6-L-threonylcarbamoyladenine synthase; Short=t(6)A synthase; AltName: Full=t(6)A37 threonylcarbamoyladenosine biosynthesis protein TsaD; AltName: Full=tRNA threonylcarbamoyladenosine biosynthesis protein TsaD	gi|122539005		37 kDa		0.31	2	[]	unknown	3	6	3	2	0	0
1152	TRUE	Empty	hypothetical protein SAOUHSC_02694 [Staphylococcus aureus subsp. aureus NCTC 8325]	gi|88196334		23 kDa		0.53	INF	[]	unknown	0	1	0	0	0	0
1153	TRUE	Empty	pyrophosphohydrolase [Staphylococcus aureus subsp. aureus NCTC 8325]	gi|88196427		15 kDa		0.57	1.2	[]	unknown	5	6	3	3	3	0
1154	TRUE	Empty	hypothetical protein SAOUHSC_02096 [Staphylococcus aureus subsp. aureus NCTC 8325]	gi|88195778		10 kDa		0.54	2	[]	unknown	1	2	0	0	0	0
1155	TRUE	Empty	RecName: Full=Urease accessory protein UreG	gi|122540543		22 kDa		0.17	0.6	[]	unknown	11	7	4	1	0	0
1156	TRUE	Empty	MULTISPECIES: O-methyltransferase [Bacteria]	gi|446264411		25 kDa		0.47	0	[]	unknown	1	0	1	0	0	0
1157	TRUE	Empty	50S rRNA methyltransferase [Staphylococcus aureus]	gi|446627430		18 kDa	TRUE	0.47	0	[]	unknown	1	0	1	1	0	0
1158	TRUE	Empty	hypothetical protein SAOUHSC_00784 [Staphylococcus aureus subsp. aureus NCTC 8325]	gi|88194545		57 kDa		0.22	0	[]	unknown	2	0	0	0	0	0
1159	TRUE	Empty	RecName: Full=Putative Holliday junction resolvase	gi|146325610		16 kDa		0.36	1.6	[]	unknown	5	8	5	2	0	0
1160	TRUE	Empty	MULTISPECIES: dihydroneopterin aldolase [Bacteria]	gi|447077046		14 kDa		0.53	INF	[]	unknown	0	1	1	0	0	0
1161	TRUE	Empty	bifunctional biotin--[acetyl-CoA-carboxylase] synthetase/biotin operon repressor [Staphylococcus aureus]	gi|445972056		37 kDa		0.55	1.5	[]	unknown	2	3	2	0	0	0
1162	TRUE	Empty	MULTISPECIES: potassium transporter Trk [Bacteria]	gi|446436435		24 kDa		0.65	1	[]	unknown	2	2	4	0	0	0
1163	TRUE	Empty	TetR family transcriptional regulator [Staphylococcus aureus]	gi|446824250		22 kDa	TRUE	0.15	0.2	[]	unknown	4	1	0	1	0	0
1164	TRUE	Empty	hypothetical protein SAOUHSC_02149 [Staphylococcus aureus subsp. aureus NCTC 8325]	gi|88195829		21 kDa		0.47	0	[]	unknown	1	0	0	0	0	0
1165	TRUE	Empty	hypothetical protein SAOUHSC_01314 [Staphylococcus aureus subsp. aureus NCTC 8325]	gi|88195044		23 kDa		0.47	0	[]	unknown	1	0	1	0	0	0
1166	TRUE	Empty	RecName: Full=Holliday junction ATP-dependent DNA helicase RuvA	gi|123098028		22 kDa		0.57	1.2	[]	unknown	4	5	5	4	3	0
1167	TRUE	Empty	hypothetical protein SAOUHSC_02406 [Staphylococcus aureus subsp. aureus NCTC 8325]	gi|88196067		35 kDa		0.086	0.2	[]	unknown	5	1	1	0	0	0
1168	TRUE	Empty	RecName: Full=Lysostaphin resistance protein A	gi|122538799		47 kDa		1	INF	[]	unknown	0	0	0	0	1	0
1169	TRUE	Empty	1-acyl-sn-glycerol-3-phosphate acyltransferase domain-containing protein [Staphylococcus aureus subsp. aureus NCTC 8325]	gi|88195537		23 kDa		0.57	1.2	[]	unknown	4	5	0	0	0	0
1170	TRUE	Empty	hypothetical protein SAOUHSC_02898 [Staphylococcus aureus subsp. aureus NCTC 8325]	gi|88196526		25 kDa		0.077	INF	[]	unknown	0	4	2	0	0	0
1171	TRUE	Empty	methylated-DNA--protein-cysteine methyltransferase [Staphylococcus aureus subsp. aureus NCTC 8325]	gi|88196492		19 kDa		0.45	0.7	[]	unknown	3	2	1	0	0	0
1172	TRUE	Empty	RecName: Full=D-alanine--poly(phosphoribitol) ligase subunit 2; AltName: Full=D-alanyl carrier protein; Short=DCP	gi|123098054		9 kDa		0.34	1.5	[]	unknown	8	12	10	5	6	6
1173	TRUE	Empty	alkaline phosphatase synthesis transcriptional regulatory protein [Staphylococcus aureus subsp. aureus NCTC 8325]	gi|88195500		27 kDa		0.18	0.4	[]	unknown	5	2	4	1	0	0
1174	TRUE	Empty	hypothetical protein SAOUHSC_00940 [Staphylococcus aureus subsp. aureus NCTC 8325]	gi|88194697		23 kDa		0.43	0.8	[]	unknown	6	5	7	1	1	0
1175	TRUE	Empty	hypothetical protein SAOUHSC_00565 [Staphylococcus aureus subsp. aureus NCTC 8325]	gi|88194343		14 kDa		0.6	1	[]	unknown	3	3	3	3	2	0
1176	TRUE	Empty	hypothetical protein SAOUHSC_00060 [Staphylococcus aureus subsp. aureus NCTC 8325]	gi|88193879		61 kDa		0.47	0	[]	unknown	1	0	0	0	0	0
1177	TRUE	Empty	hypothetical protein SAOUHSC_02372 [Staphylococcus aureus subsp. aureus NCTC 8325]	gi|88196035		26 kDa		0.53	INF	[]	unknown	0	1	1	0	0	0
1178	TRUE	Empty	ribosomal-protein-serine acetyltransferase [Staphylococcus aureus]	gi|446389797		21 kDa		0.47	0	[]	unknown	1	0	0	0	1	0
1179	TRUE	Empty	hypothetical protein SAOUHSC_01317 [Staphylococcus aureus subsp. aureus NCTC 8325]	gi|88195047		33 kDa		0.29	0.5	[]	unknown	4	2	3	1	0	0
1180	TRUE	Empty	DNA methyltransferase [Staphylococcus aureus]	gi|446312720		11 kDa		0.5	1.2	[]	unknown	8	10	6	5	5	1
1181	TRUE	Empty	haloacid dehalogenase [Staphylococcus aureus]	gi|446644361		43 kDa		0.72	1	[]	unknown	1	1	1	0	0	0
1182	TRUE	Empty	MULTISPECIES: ATP synthase epsilon chain [Bacteria]	gi|447017138		15 kDa		0.57	1	[]	unknown	4	4	3	2	0	0
1183	TRUE	Empty	MULTISPECIES: carbohydrate kinase [Bacteria]	gi|446371363		30 kDa	TRUE	0.53	INF	[]	unknown	0	1	0	0	0	0
1184	TRUE	Empty	hypothetical protein SAOUHSC_00107 [Staphylococcus aureus subsp. aureus NCTC 8325]	gi|88193920		58 kDa		0.11	0	[]	unknown	3	0	1	0	0	0
1185	TRUE	Empty	MULTISPECIES: addiction module antitoxin RelB [Bacteria]	gi|446035407		10 kDa		0.53	INF	[]	unknown	0	1	0	0	0	0
1186	TRUE	Empty	RecName: Full=Sensory transduction protein LytR	gi|45477027		28 kDa		1	INF	[]	unknown	0	0	0	0	0	0
1187	TRUE	Empty	hypothetical protein SAOUHSC_01358 [Staphylococcus aureus subsp. aureus NCTC 8325]	gi|88195085		45 kDa		0.53	INF	[]	unknown	0	1	0	0	0	0
1188	TRUE	Empty	isoprenyl transferase [Staphylococcus aureus]	gi|446395850		30 kDa		0.53	INF	[]	unknown	0	1	0	0	0	0
1189	TRUE	Empty	ribokinase [Staphylococcus aureus subsp. aureus NCTC 8325]	gi|88194046		32 kDa		0.51	1	[]	unknown	8	8	6	2	0	0
1190	TRUE	Empty	sodium:alanine symporter family protein [Staphylococcus aureus subsp. aureus NCTC 8325]	gi|88195082		52 kDa		1	INF	[]	unknown	0	0	0	0	0	0
1191	TRUE	Empty	hypothetical protein SAOUHSC_01596 [Staphylococcus aureus subsp. aureus NCTC 8325]	gi|88195307		28 kDa		0.72	1	[]	unknown	1	1	1	0	0	0
1192	TRUE	Empty	RecName: Full=3-dehydroquinate dehydratase; Short=3-dehydroquinase; AltName: Full=Type I DHQase; AltName: Full=Type I dehydroquinase; Short=DHQ1	gi|123003487		27 kDa		0.6	1	[]	unknown	3	3	3	0	1	0
1193	TRUE	Empty	lytic regulatory protein [Staphylococcus aureus subsp. aureus NCTC 8325]	gi|88196053		41 kDa		0.54	2	[]	unknown	1	2	0	0	1	0
1194	TRUE	Empty	RecName: Full=3-dehydroquinate synthase	gi|122539541		40 kDa		0.15	0.2	[]	unknown	4	1	1	0	0	0
1195	TRUE	Empty	capsular polysaccharide biosynthesis protein Cap8C [Staphylococcus aureus subsp. aureus NCTC 8325]	gi|88193929		29 kDa		0.43	0.8	[]	unknown	6	5	3	0	0	0
1196	TRUE	Empty	RecName: Full=7-cyano-7-deazaguanine synthase; AltName: Full=7-cyano-7-carbaguanine synthase; AltName: Full=PreQ(0) synthase; AltName: Full=Queuosine biosynthesis protein QueC	gi|110816264		25 kDa		0.54	2	[]	unknown	1	2	1	0	0	0
1197	TRUE	Empty	hypothetical protein SAOUHSC_02659 [Staphylococcus aureus subsp. aureus NCTC 8325]	gi|88196299		24 kDa		0.22	0	[]	unknown	2	0	0	0	0	0
1198	TRUE	Empty	MULTISPECIES: capsular polysaccharide biosynthesis protein Cap8M [Bacteria]	gi|446747842		21 kDa		0.65	1	[]	unknown	2	2	1	0	0	0
1199	TRUE	Empty	MULTISPECIES: methyltransferase [Bacteria]	gi|447186540		20 kDa		0.27	2.5	[]	unknown	2	5	3	1	0	0
1200	TRUE	Empty	MULTISPECIES: hypothetical protein [Bacteria]	gi|446660340		21 kDa		0.72	1	[]	unknown	1	1	3	1	1	0
1201	TRUE	Empty	MULTISPECIES: hypothetical protein [Bacteria]	gi|446050801		16 kDa		0.43	0.8	[]	unknown	6	5	7	3	2	0
1202	TRUE	Empty	hypothetical protein SAOUHSC_00421 [Staphylococcus aureus subsp. aureus NCTC 8325]	gi|88194214		33 kDa		0.54	2	[]	unknown	1	2	3	0	0	0
1203	TRUE	Empty	RecName: Full=Protein NrdI	gi|110815876		15 kDa		0.65	1	[]	unknown	2	2	1	0	0	0
1204	TRUE	Empty	MULTISPECIES: AraC family transcriptional regulator [Bacteria]	gi|446399666		30 kDa		0.4	2	[]	unknown	2	4	0	0	0	0
1205	TRUE	Empty	hypothetical protein SAOUHSC_00318 [Staphylococcus aureus subsp. aureus NCTC 8325]	gi|88194119		36 kDa		0.65	1	[]	unknown	2	2	1	0	0	0
1206	TRUE	Empty	fructokinase [Staphylococcus aureus subsp. aureus NCTC 8325]	gi|88195937		35 kDa		0.54	1	[]	unknown	6	6	4	2	0	0
1207	TRUE	Empty	MULTISPECIES: hypothetical protein [Bacteria]	gi|446744905		15 kDa		0.53	INF	[]	unknown	0	1	2	0	0	0
1208	TRUE	Empty	RecName: Full=Putative N-acetylmannosamine-6-phosphate 2-epimerase; AltName: Full=ManNAc-6-P epimerase	gi|122540263		25 kDa		0.72	1	[]	unknown	1	1	0	0	0	0
1209	TRUE	Empty	RecName: Full=Mini-ribonuclease 3; Short=Mini-3; Short=Mini-RNase 3; AltName: Full=Mini-RNase III; Short=Mini-III	gi|122540661		16 kDa		0.54	2	[]	unknown	1	2	2	1	1	0
1210	TRUE	Empty	MULTISPECIES: hypothetical protein [Bacteria]	gi|447014748		14 kDa		0.6	1	[]	unknown	3	3	2	1	0	0
1211	TRUE	Empty	hypothetical protein SAOUHSC_01024 [Staphylococcus aureus subsp. aureus NCTC 8325]	gi|88194777		5 kDa		0.46	1.4	[]	unknown	5	7	4	4	3	3
1212	TRUE	Empty	MULTISPECIES: dihydrofolate reductase [Bacteria]	gi|446097891		18 kDa		0.47	0	[]	unknown	1	0	0	0	0	0
1213	TRUE	Empty	Laccase SACOL1200 [Staphylococcus aureus]	gi|446922082		30 kDa	TRUE	0.44	0.8	[]	unknown	4	3	4	0	0	0
1214	TRUE	Empty	hypothetical protein SAOUHSC_01476 [Staphylococcus aureus subsp. aureus NCTC 8325]	gi|88195193		12 kDa		0.55	1.5	[]	unknown	2	3	3	0	1	0
1215	TRUE	Empty	hypothetical protein SAOUHSC_01957 [Staphylococcus aureus subsp. aureus NCTC 8325]	gi|88195650		31 kDa		0.54	2	[]	unknown	1	2	0	0	0	0
1216	TRUE	Empty	MULTISPECIES: hypothetical protein [Bacteria]	gi|446291047		17 kDa		0.54	2	[]	unknown	1	2	1	2	0	0
1217	TRUE	Empty	hypothetical protein SAOUHSC_01464 [Staphylococcus aureus subsp. aureus NCTC 8325]	gi|88195181		14 kDa		0.6	1	[]	unknown	3	3	2	2	0	0
1218	TRUE	Empty	MULTISPECIES: 16S rRNA methyltransferase [Bacteria]	gi|446202071		31 kDa		0.65	1	[]	unknown	2	2	2	0	0	0
1219	TRUE	Empty	hypothetical protein SAOUHSC_02726 [Staphylococcus aureus subsp. aureus NCTC 8325]	gi|88196366		18 kDa		0.65	1	[]	unknown	2	2	0	0	0	0
1220	TRUE	Empty	RecName: Full=UPF0738 protein SAOUHSC_00941	gi|122540492		14 kDa		0.4	2	[]	unknown	2	4	4	3	2	0
1221	TRUE	Empty	RecName: Full=Ribonuclease HII; Short=RNase HII	gi|122539702		29 kDa		0.47	0	[]	unknown	1	0	0	0	0	0
1222	TRUE	Empty	energy-coupling factor transporter ATPase [Staphylococcus aureus]	gi|446311807		30 kDa		0.54	2	[]	unknown	1	2	2	0	0	0
1223	TRUE	Empty	hypothetical protein SAOUHSC_00719 [Staphylococcus aureus subsp. aureus NCTC 8325]	gi|88194484		27 kDa		0.45	0.7	[]	unknown	3	2	0	0	0	0
1224	TRUE	Empty	hypothetical protein SAOUHSC_00305 [Staphylococcus aureus subsp. aureus NCTC 8325]	gi|161353536		12 kDa		0.34	1.8	[]	unknown	4	7	6	1	0	0
1225	TRUE	Empty	MULTISPECIES: hypothetical protein [Bacteria]	gi|446587392		20 kDa		0.44	0.8	[]	unknown	4	3	2	0	0	0
1226	TRUE	Empty	RecName: Full=Holliday junction ATP-dependent DNA helicase RuvB	gi|123407042		38 kDa		0.72	1	[]	unknown	1	1	1	1	0	0
1227	TRUE	Empty	hypothetical protein SAOUHSC_01091 [Staphylococcus aureus subsp. aureus NCTC 8325]	gi|88194838		27 kDa		0.43	0.8	[]	unknown	6	5	7	3	1	0
1228	TRUE	Empty	RecName: Full=tRNA pseudouridine synthase A; AltName: Full=tRNA pseudouridine(38-40) synthase; AltName: Full=tRNA pseudouridylate synthase I; AltName: Full=tRNA-uridine isomerase I	gi|123098008		31 kDa		0.54	2	[]	unknown	1	2	0	0	0	0
1229	TRUE	Empty	hypothetical protein SAOUHSC_01156 [Staphylococcus aureus subsp. aureus NCTC 8325]	gi|88194897		31 kDa		0.53	INF	[]	unknown	0	1	0	0	0	0
1230	TRUE	Empty	hypothetical protein SAOUHSC_01077 [Staphylococcus aureus subsp. aureus NCTC 8325]	gi|88194826		21 kDa		0.27	2.5	[]	unknown	2	5	2	3	1	0
1231	TRUE	Empty	hypothetical protein SAOUHSC_02894 [Staphylococcus aureus subsp. aureus NCTC 8325]	gi|88196522		14 kDa		0.72	1	[]	unknown	1	1	2	0	0	0
1232	TRUE	Empty	RecName: Full=50S ribosomal protein L24	gi|123291760		12 kDa		0.48	1.3	[]	unknown	6	8	6	3	2	0
1233	TRUE	Empty	hypothetical protein SAOUHSC_02357 [Staphylococcus aureus subsp. aureus NCTC 8325]	gi|88196020		40 kDa		0.11	0.3	[]	unknown	6	2	1	1	0	0
1234	TRUE	Empty	MULTISPECIES: peptidase M23 [Bacteria]	gi|446378006		17 kDa		0.43	0.8	[]	unknown	5	4	0	1	2	0
1235	TRUE	Empty	ribosome maturation factor RimM [Staphylococcus aureus]	gi|447184724		19 kDa		0.44	0.8	[]	unknown	4	3	3	2	2	0
1236	TRUE	Empty	RecName: Full=Cyclic pyranopterin monophosphate synthase accessory protein; AltName: Full=Molybdenum cofactor biosynthesis protein C	gi|123003428		18 kDa		0.29	0.5	[]	unknown	4	2	1	1	0	0
1237	TRUE	Empty	MULTISPECIES: DNA-binding protein [Bacteria]	gi|447168546		7 kDa		0.35	3	[]	unknown	1	3	2	0	0	0
1238	TRUE	Empty	ribose-5-phosphate isomerase A [Staphylococcus aureus]	gi|446578518		26 kDa		0.46	0.5	[]	unknown	2	1	1	0	1	0
1239	TRUE	Empty	DNA polymerase III subunit delta [Staphylococcus aureus subsp. aureus NCTC 8325]	gi|88195396		38 kDa		1	INF	[]	unknown	0	0	1	0	0	0
1240	TRUE	Empty	hypothetical protein SAOUHSC_02335 [Staphylococcus aureus subsp. aureus NCTC 8325]	gi|88196001		19 kDa		0.35	3	[]	unknown	1	3	2	2	2	0
1241	TRUE	Empty	hypothetical protein SAOUHSC_02651 [Staphylococcus aureus subsp. aureus NCTC 8325]	gi|88196291		20 kDa		0.6	1	[]	unknown	3	3	5	0	0	0
1242	TRUE	Empty	hypothetical protein [Staphylococcus aureus]	gi|447086163		18 kDa		0.72	1	[]	unknown	1	1	2	0	0	0
1243	TRUE	Empty	MULTISPECIES: hypothetical protein [Bacteria]	gi|446745959		34 kDa		0.55	1	[]	unknown	5	5	5	0	2	0
1244	TRUE	Empty	hypothetical protein SAOUHSC_01729 [Staphylococcus aureus subsp. aureus NCTC 8325]	gi|88195434		6 kDa		0.65	1	[]	unknown	2	2	2	1	0	0
1245	TRUE	Empty	MULTISPECIES: cell-wall-binding lipoprotein [Bacteria]	gi|446590993		24 kDa		0.72	1	[]	unknown	1	1	0	0	0	0
1246	TRUE	Empty	conserved hypothetical protein [Staphylococcus aureus subsp. aureus NCTC 8325]	gi|87203758		7 kDa		0.72	1	[]	unknown	1	1	2	0	0	0
1247	TRUE	Empty	hypothetical protein SAOUHSC_01456 [Staphylococcus aureus subsp. aureus NCTC 8325]	gi|88195175-DECOY		?		1	INF	[]	unknown	0	0	0	0	0	1
1248	TRUE	Empty	hypothetical protein SAOUHSC_00244 [Staphylococcus aureus subsp. aureus NCTC 8325]	gi|88194051		16 kDa		0.54	2	[]	unknown	1	2	1	0	0	0
1249	TRUE	Empty	RecName: Full=2-isopropylmalate synthase; AltName: Full=Alpha-IPM synthase; AltName: Full=Alpha-isopropylmalate synthase	gi|122538997		56 kDa		0.53	INF	[]	unknown	0	1	0	0	0	0
1250	TRUE	Empty	HrcA family transcriptional regulator [Staphylococcus aureus]	gi|446549794		37 kDa		0.53	INF	[]	unknown	0	1	1	0	0	0
1251	TRUE	Empty	hypothetical protein SAOUHSC_01324 [Staphylococcus aureus subsp. aureus NCTC 8325]	gi|88195054		12 kDa		0.45	0.7	[]	unknown	3	2	2	0	0	0
1252	TRUE	Empty	MULTISPECIES: HxlR family transcriptional regulator [Bacteria]	gi|446373583		13 kDa		0.11	0.5	[]	unknown	10	5	1	3	4	0
1253	TRUE	Empty	RecName: Full=Acylphosphatase; AltName: Full=Acylphosphate phosphohydrolase	gi|122539587		10 kDa		0.15	2.7	[]	unknown	3	8	3	4	2	0
1254	TRUE	Empty	RecName: Full=Probable transglycosylase SceD; Flags: Precursor	gi|122538961		24 kDa		0.3	0.6	[]	unknown	5	3	3	2	0	0
1255	TRUE	Empty	PVL orf 50-like protein [Staphylococcus aureus subsp. aureus NCTC 8325]	gi|88195274		17 kDa		1	INF	[]	unknown	0	0	0	0	0	0
1256	TRUE	Empty	hypothetical protein SAOUHSC_01488 [Staphylococcus aureus subsp. aureus NCTC 8325]	gi|88195205		22 kDa		0.2	0.5	[]	unknown	6	3	2	1	1	0
1257	TRUE	Empty	hypothetical protein SAOUHSC_00663 [Staphylococcus aureus subsp. aureus NCTC 8325]	gi|88194428		19 kDa		0.46	0.5	[]	unknown	2	1	3	0	0	0
1258	TRUE	Empty	hypothetical protein SAOUHSC_01988 [Staphylococcus aureus subsp. aureus NCTC 8325]	gi|88195679		18 kDa		0.22	0	[]	unknown	2	0	0	0	0	0
1259	TRUE	Empty	MULTISPECIES: DNA-binding protein [Bacteria]	gi|446453465		14 kDa		0.4	2	[]	unknown	2	4	5	0	0	0
1260	TRUE	Empty	MULTISPECIES: hypothetical protein [Bacteria]	gi|446279108		8 kDa		0.43	0.8	[]	unknown	6	5	4	2	0	0
1261	TRUE	Empty	RecName: Full=ATP synthase subunit b; AltName: Full=ATP synthase F(0) sector subunit b; AltName: Full=ATPase subunit I; AltName: Full=F-type ATPase subunit b; Short=F-ATPase subunit b	gi|122540612-DECOY		?		1	INF	[]	unknown	0	0	1	0	0	0
1262	TRUE	Empty	hypothetical protein SAOUHSC_02936 [Staphylococcus aureus subsp. aureus NCTC 8325]	gi|88196563		26 kDa		0.46	0.5	[]	unknown	2	1	1	1	0	0
1263	TRUE	Empty	hypothetical protein SAOUHSC_00463 [Staphylococcus aureus subsp. aureus NCTC 8325]	gi|88194250		20 kDa		0.55	1.5	[]	unknown	2	3	0	0	0	0
1264	TRUE	Empty	RecName: Full=Uncharacterized protein SAOUHSC_00094; Flags: Precursor	gi|122540536		22 kDa		0.6	1	[]	unknown	3	3	0	1	2	4
1265	TRUE	Empty	hypothetical protein SAOUHSC_00285 [Staphylococcus aureus subsp. aureus NCTC 8325]	gi|88194088		38 kDa		0.72	1	[]	unknown	1	1	0	0	0	0
1266	TRUE	Empty	MULTISPECIES: hypothetical protein [Bacteria]	gi|447050013		13 kDa		0.72	1	[]	unknown	1	1	0	0	0	0
1267	TRUE	Empty	isochorismatase [Staphylococcus aureus]	gi|487720209		21 kDa		1	INF	[]	unknown	0	0	0	0	0	0
1268	TRUE	Empty	hypothetical protein SAOUHSC_02130 [Staphylococcus aureus subsp. aureus NCTC 8325]	gi|88195810		7 kDa		1	INF	[]	unknown	0	0	0	0	0	0
1269	TRUE	Empty	MULTISPECIES: ribosomal RNA small subunit methyltransferase G [Bacteria]	gi|446137740		27 kDa		0.54	2	[]	unknown	1	2	1	0	0	0
1270	TRUE	Empty	hypothetical protein [Staphylococcus aureus]	gi|486201902		27 kDa		1	INF	[]	unknown	0	0	1	0	0	0
1271	TRUE	Empty	MULTISPECIES: membrane protein [Bacteria]	gi|446951120		40 kDa		1	INF	[]	unknown	0	0	1	0	0	0
1272	TRUE	Empty	hypothetical protein SAOUHSC_02727 [Staphylococcus aureus subsp. aureus NCTC 8325]	gi|88196367		22 kDa	TRUE	0.22	4	[]	unknown	1	4	1	0	0	0
1273	TRUE	Empty	MULTISPECIES: hypothetical protein [Bacteria]	gi|445992971		24 kDa		0.53	INF	[]	unknown	0	1	1	0	0	0
1274	TRUE	Empty	hypothetical protein SAOUHSC_00862 [Staphylococcus aureus subsp. aureus NCTC 8325]	gi|88194619		15 kDa		0.54	2	[]	unknown	1	2	1	0	0	0
1275	TRUE	Empty	MULTISPECIES: hypothetical protein [Bacteria]	gi|445931214		50 kDa		0.35	3	[]	unknown	1	3	0	0	0	0
1276	TRUE	Empty	RecName: Full=Pyruvate formate-lyase-activating enzyme; Short=PFL-activating enzyme	gi|122064908		28 kDa		0.45	0.7	[]	unknown	3	2	0	0	0	0
1277	TRUE	Empty	uroporphyrinogen III methyltransferase [Staphylococcus aureus]	gi|446728637		25 kDa		0.29	0.5	[]	unknown	4	2	1	0	0	0
1278	TRUE	Empty	hypothetical protein SAOUHSC_00864 [Staphylococcus aureus subsp. aureus NCTC 8325]	gi|88194621		17 kDa		0.27	0.3	[]	unknown	3	1	3	0	1	0
1279	TRUE	Empty	hypothetical protein SAOUHSC_00278 [Staphylococcus aureus subsp. aureus NCTC 8325]	gi|88194082		19 kDa	TRUE	0.72	1	[]	unknown	1	1	1	0	0	0
1280	TRUE	Empty	MULTISPECIES: hypothetical protein [Bacteria]	gi|446447047		20 kDa		0.47	0	[]	unknown	1	0	0	0	0	0
1281	TRUE	Empty	sigmaB regulation protein RsbU, putative [Staphylococcus aureus subsp. aureus NCTC 8325]	gi|87203526		12 kDa	TRUE	0.43	0.8	[]	unknown	5	4	1	1	0	0
1282	TRUE	Empty	hypothetical protein SAOUHSC_02367 [Staphylococcus aureus subsp. aureus NCTC 8325]	gi|88196030		20 kDa		0.6	1	[]	unknown	3	3	3	1	0	0
1283	TRUE	Empty	hypothetical protein SAOUHSC_00041 [Staphylococcus aureus subsp. aureus NCTC 8325]	gi|88193862		11 kDa		0.54	2	[]	unknown	1	2	3	0	0	0
1284	TRUE	Empty	RecName: Full=Protein ArsC; AltName: Full=Arsenate reductase; AltName: Full=Arsenical pump modifier; AltName: Full=Low molecular weight protein-tyrosine-phosphatase	gi|122539260		15 kDa		0.65	1	[]	unknown	2	2	1	0	0	0
1285	TRUE	Empty	o-succinylbenzoic acid--CoA ligase [Staphylococcus aureus subsp. aureus NCTC 8325]	gi|88195611		55 kDa		0.53	INF	[]	unknown	0	1	0	0	0	0
1286	TRUE	Empty	hypothetical protein SAOUHSC_00854 [Staphylococcus aureus subsp. aureus NCTC 8325]	gi|88194612		39 kDa		1	INF	[]	unknown	0	0	1	0	0	0
1287	TRUE	Empty	MULTISPECIES: hypothetical protein [Bacteria]	gi|447046047		16 kDa		0.46	0.5	[]	unknown	2	1	1	0	0	0
1288	TRUE	Empty	transcriptional regulator [Staphylococcus aureus]	gi|446969983		17 kDa		1	INF	[]	unknown	0	0	3	0	0	0
1289	TRUE	Empty	2-dehydropantoate 2-reductase [Staphylococcus aureus]	gi|446876309 (+1)		32 kDa		0.22	0	[]	unknown	2	0	0	0	0	0
1290	TRUE	Empty	MULTISPECIES: cell division protein DivIC [Bacteria]	gi|446715088		15 kDa		0.53	INF	[]	unknown	0	1	0	0	0	0
1291	TRUE	Empty	MULTISPECIES: FMN reductase [Bacteria]	gi|446951175		21 kDa		0.27	0.3	[]	unknown	3	1	4	0	1	0
1292	TRUE	Empty	histidinol-phosphate aminotransferase [Staphylococcus aureus subsp. aureus NCTC 8325]	gi|88196630		38 kDa		1	INF	[]	unknown	0	0	1	0	0	0
1293	TRUE	Empty	hypothetical protein SAOUHSC_02686 [Staphylococcus aureus subsp. aureus NCTC 8325]	gi|88196326		20 kDa		0.54	2	[]	unknown	1	2	2	0	0	0
1294	TRUE	Empty	MULTISPECIES: DNA polymerase III subunit epsilon [Bacteria]	gi|446536387		21 kDa		0.6	1	[]	unknown	3	3	3	1	0	0
1295	TRUE	Empty	hypothetical protein SAOUHSC_00811 [Staphylococcus aureus subsp. aureus NCTC 8325]	gi|88194571		20 kDa		0.45	0.7	[]	unknown	3	2	3	2	1	0
1296	TRUE	Empty	hypothetical protein [Staphylococcus aureus]	gi|446355458 (+1)		14 kDa		0.43	0.8	[]	unknown	5	4	4	3	2	0
1297	TRUE	Empty	hypothetical protein SAOUHSC_01270 [Staphylococcus aureus subsp. aureus NCTC 8325]	gi|88195003		14 kDa		0.53	INF	[]	unknown	0	1	2	0	0	0
1298	TRUE	Empty	hypothetical protein SAOUHSC_00984 [Staphylococcus aureus subsp. aureus NCTC 8325]	gi|88194741		31 kDa		1	INF	[]	unknown	0	0	2	0	0	0
1299	TRUE	Empty	hypothetical protein SAOUHSC_00540 [Staphylococcus aureus subsp. aureus NCTC 8325]	gi|88194320		24 kDa		0.18	3	[]	unknown	2	6	4	0	0	0
1300	TRUE	Empty	RecName: Full=UPF0271 protein SAOUHSC_01708	gi|122539381		27 kDa		1	INF	[]	unknown	0	0	0	0	0	0
1301	TRUE	Empty	MarR family transcriptional regulator [Staphylococcus aureus]	gi|446289490		18 kDa		0.47	0	[]	unknown	1	0	0	0	0	0
1302	TRUE	Empty	hypothetical protein SAOUHSC_00304 [Staphylococcus aureus subsp. aureus NCTC 8325]	gi|88194105		37 kDa		0.28	INF	[]	unknown	0	2	1	0	0	0
1303	TRUE	Empty	MULTISPECIES: phosphoesterase [Bacteria]	gi|445971629		19 kDa		0.54	2	[]	unknown	1	2	2	0	1	0
1304	TRUE	Empty	hypothetical protein SAOUHSC_02871 [Staphylococcus aureus subsp. aureus NCTC 8325]	gi|88196501		22 kDa		0.6	1	[]	unknown	3	3	5	2	0	0
1305	TRUE	Empty	integrase/recombinase [Staphylococcus aureus subsp. aureus NCTC 8325]	gi|88194393		21 kDa		0.47	0	[]	unknown	1	0	0	0	0	0
1306	TRUE	Empty	RecName: Full=Response regulator SaeR; AltName: Full=Staphylococcus exoprotein expression protein R	gi|122540616		27 kDa		0.45	0.7	[]	unknown	3	2	0	1	0	0
1307	TRUE	Empty	RecName: Full=Alanine racemase 2	gi|20137472		41 kDa		0.47	0	[]	unknown	1	0	0	0	0	0
1308	TRUE	Empty	hypothetical protein [Staphylococcus aureus]	gi|446136210		14 kDa	TRUE	0.47	0	[]	unknown	1	0	0	0	0	0
1309	TRUE	Empty	MULTISPECIES: hypothetical protein [Bacteria]	gi|446069248		4 kDa		0.018	0.4	[]	unknown	14	5	2	3	0	0
1310	TRUE	Empty	MULTISPECIES: hypothetical protein [Bacteria]	gi|446754239		14 kDa		0.29	0.5	[]	unknown	4	2	2	3	0	0
1311	TRUE	Empty	MULTISPECIES: acetyltransferase [Bacteria]	gi|446492030		19 kDa		0.35	3	[]	unknown	1	3	1	1	0	0
1312	TRUE	Empty	MULTISPECIES: capsular polysaccharide type 5 biosynthesis protein cap5A [Bacteria]	gi|446368444		25 kDa		0.15	0.2	[]	unknown	4	1	1	0	0	0
1313	TRUE	Empty	hypothetical protein SAOUHSC_00337 [Staphylococcus aureus subsp. aureus NCTC 8325]	gi|88194137		29 kDa	TRUE	0.72	1	[]	unknown	1	1	0	0	0	0
1314	TRUE	Empty	MULTISPECIES: initiation-control protein YabA [Bacteria]	gi|446297831		13 kDa	TRUE	0.47	0	[]	unknown	1	0	0	0	0	0
1315	TRUE	Empty	hypothetical protein SAOUHSC_00085 [Staphylococcus aureus subsp. aureus NCTC 8325]	gi|88193900-DECOY		?		1	INF	[]	unknown	0	0	0	0	0	1
1316	TRUE	Empty	MULTISPECIES: GntR family transcriptional regulator [Bacteria]	gi|446614238		15 kDa		0.54	2	[]	unknown	1	2	0	1	0	0
1317	TRUE	Empty	MULTISPECIES: molybdenum ABC transporter ATP-binding protein [Bacteria]	gi|446835763		23 kDa		0.47	0	[]	unknown	1	0	0	0	0	0
1318	TRUE	Empty	MULTISPECIES: hypothetical protein [Staphylococcus]	gi|446928151		6 kDa		0.56	1.3	[]	unknown	3	4	4	3	1	0
1319	TRUE	Empty	MULTISPECIES: urease subunit beta [Bacteria]	gi|446534782		15 kDa		0.55	1.5	[]	unknown	2	3	2	0	0	0
1320	TRUE	Empty	hypothetical protein SAOUHSC_02519 [Staphylococcus aureus subsp. aureus NCTC 8325]	gi|88196167		35 kDa		0.65	1	[]	unknown	2	2	1	2	0	0
1321	TRUE	Empty	MULTISPECIES: hydroxyacylglutathione hydrolase [Bacteria]	gi|447145752		23 kDa		0.46	0.5	[]	unknown	2	1	0	2	1	0
1322	TRUE	Empty	MULTISPECIES: glutathione peroxidase [Bacteria]	gi|446988012		19 kDa		0.53	INF	[]	unknown	0	1	0	0	0	0
1323	TRUE	Empty	MULTISPECIES: ATPase [Bacteria]	gi|446925821		19 kDa		0.47	0	[]	unknown	1	0	0	1	0	0
1324	TRUE	Empty	acetyl-CoA carboxylase biotin carboxyl carrier protein [Staphylococcus aureus]	gi|446942081		17 kDa		0.47	0	[]	unknown	1	0	1	0	0	0
1325	TRUE	Empty	hypothetical protein SAOUHSC_02757 [Staphylococcus aureus subsp. aureus NCTC 8325]	gi|88196393		10 kDa		0.55	1.5	[]	unknown	2	3	0	0	0	0
1326	TRUE	Empty	RecName: Full=Hydroxyethylthiazole kinase; AltName: Full=4-methyl-5-beta-hydroxyethylthiazole kinase; Short=TH kinase; Short=Thz kinase	gi|122538965		28 kDa		1	INF	[]	unknown	0	0	1	0	0	0
1327	TRUE	Empty	GNAT family acetyltransferase [Staphylococcus aureus]	gi|446163747		15 kDa		1	INF	[]	unknown	0	0	1	0	0	0
1328	TRUE	Empty	hypothetical protein SAOUHSC_02756 [Staphylococcus aureus subsp. aureus NCTC 8325]	gi|88196392		11 kDa		0.72	1	[]	unknown	1	1	0	0	0	0
1329	TRUE	Empty	MULTISPECIES: MarR family transcriptional regulator [Staphylococcus]	gi|446298380		17 kDa		0.53	INF	[]	unknown	0	1	0	0	0	0
1330	TRUE	Empty	MULTISPECIES: ribonuclease H [Bacteria]	gi|446985680		15 kDa		0.57	1.2	[]	unknown	4	5	5	3	1	0
1331	TRUE	Empty	hypothetical protein SAOUHSC_01831 [Staphylococcus aureus subsp. aureus NCTC 8325]	gi|88195531		16 kDa		0.57	1	[]	unknown	4	4	6	0	0	0
1332	TRUE	Empty	fatty acid biosynthesis transcriptional regulator [Staphylococcus aureus subsp. aureus NCTC 8325]	gi|88194934		22 kDa		0.46	0.5	[]	unknown	2	1	3	1	0	0
1333	TRUE	Empty	hypothetical protein SAOUHSC_02824 [Staphylococcus aureus subsp. aureus NCTC 8325]	gi|88196458		22 kDa	TRUE	0.47	0	[]	unknown	1	0	0	0	0	0
1334	TRUE	Empty	MULTISPECIES: hypothetical protein [Bacteria]	gi|446163733		13 kDa		0.55	1.5	[]	unknown	2	3	5	5	4	0
1335	TRUE	Empty	RecName: Full=Response regulator ArlR	gi|67460427		25 kDa		0.2	0.5	[]	unknown	6	3	1	1	0	0
1336	TRUE	Empty	MULTISPECIES: hypothetical protein [Bacteria]	gi|446654736		17 kDa		0.46	0.5	[]	unknown	2	1	0	0	0	0
1337	TRUE	Empty	hypothetical protein SAOUHSC_00874 [Staphylococcus aureus subsp. aureus NCTC 8325]	gi|88194631		13 kDa		0.6	1	[]	unknown	3	3	1	1	0	0
1338	TRUE	Empty	RecName: Full=Oxygen regulatory protein NreC; AltName: Full=Nitrogen regulation protein C	gi|205829309		24 kDa		0.72	1	[]	unknown	1	1	0	0	0	0
1339	TRUE	Empty	RecName: Full=50S ribosomal protein L35	gi|148887112		8 kDa		0.65	1	[]	unknown	2	2	3	0	0	0
1340	TRUE	Empty	MULTISPECIES: 2-amino-4-hydroxy-6-hydroxymethyldihydropteridine pyrophosphokinase [Bacteria]	gi|446536370		18 kDa		0.46	0.5	[]	unknown	2	1	2	1	0	0
1341	TRUE	Empty	MULTISPECIES: nitrite reductase NAD(P)H small subunit [Bacteria]	gi|446370367		11 kDa		0.43	0.8	[]	unknown	6	5	0	1	0	0
1342	TRUE	Empty	peptide deformylase-like [Staphylococcus aureus]	gi|446908037		18 kDa		1	INF	[]	unknown	0	0	0	0	0	0
1343	TRUE	Empty	MULTISPECIES: hypothetical protein [Bacteria]	gi|447174679		10 kDa		0.29	0.5	[]	unknown	4	2	1	0	0	0
1344	TRUE	Empty	hypothetical protein SAOUHSC_01600 [Staphylococcus aureus subsp. aureus NCTC 8325]	gi|88195311		34 kDa		0.47	0	[]	unknown	1	0	0	0	0	0
1345	TRUE	Empty	MULTISPECIES: hypothetical protein [Staphylococcus]	gi|447173019		7 kDa		0.47	0	[]	unknown	1	0	1	0	0	0
1346	TRUE	Empty	MULTISPECIES: hypothetical protein [Bacteria]	gi|446981587		31 kDa		1	INF	[]	unknown	0	0	1	0	0	0
1347	TRUE	Empty	MULTISPECIES: type VII secretion protein [Bacteria]	gi|446030983		10 kDa	TRUE	0.54	2	[]	unknown	1	2	3	0	0	0
1348	TRUE	Empty	alanine acetyltransferase [Staphylococcus aureus]	gi|446294903		18 kDa	TRUE	0.53	INF	[]	unknown	0	1	1	0	0	0
1349	TRUE	Empty	hypothetical protein SAOUHSC_01120 [Staphylococcus aureus subsp. aureus NCTC 8325]	gi|88194864		9 kDa		0.6	1	[]	unknown	3	3	5	3	3	3
1350	TRUE	Empty	hypothetical protein SAOUHSC_01863 [Staphylococcus aureus subsp. aureus NCTC 8325]	gi|88195560		12 kDa		0.47	0	[]	unknown	1	0	0	0	0	0
1351	TRUE	Empty	MULTISPECIES: hypothetical protein [Bacteria]	gi|447157732		10 kDa		0.72	1	[]	unknown	1	1	1	0	0	0
1352	TRUE	Empty	hypothetical protein SAOUHSC_00242 [Staphylococcus aureus subsp. aureus NCTC 8325]	gi|88194049		37 kDa		0.28	INF	[]	unknown	0	2	0	0	0	0
1353	TRUE	Empty	hypothetical protein SAOUHSC_00034 [Staphylococcus aureus subsp. aureus NCTC 8325]	gi|88193855		10 kDa		0.54	2	[]	unknown	1	2	2	1	0	0
1354	TRUE	Empty	MULTISPECIES: isochorismatase [Bacteria]	gi|446071831		21 kDa		0.72	1	[]	unknown	1	1	1	2	1	0
1355	TRUE	Empty	RecName: Full=Heptaprenylglyceryl phosphate synthase; Short=HepGP synthase; AltName: Full=Glycerol-1-phosphate heptaprenyltransferase	gi|109940116		26 kDa		0.47	0	[]	unknown	1	0	1	0	0	0
1356	TRUE	Empty	MULTISPECIES: serine acetyltransferase [Bacteria]	gi|446842649 (+1)		24 kDa		0.46	0.5	[]	unknown	2	1	2	0	0	0
1357	TRUE	Empty	glutamine synthetase repressor [Staphylococcus aureus subsp. aureus NCTC 8325]	gi|88195017		14 kDa	TRUE	0.46	0.5	[]	unknown	2	1	0	0	0	0
1358	TRUE	Empty	MULTISPECIES: Cro/Cl family transcriptional regulator [Bacteria]	gi|446782187		15 kDa		0.53	INF	[]	unknown	0	1	0	0	0	0
1359	TRUE	Empty	glycine/betaine ABC transporter [Staphylococcus aureus]	gi|447011722		60 kDa		0.72	1	[]	unknown	1	1	0	0	0	0
1360	TRUE	Empty	MULTISPECIES: hypothetical protein [Staphylococcus]	gi|446189179		7 kDa		0.15	0.2	[]	unknown	4	1	3	2	0	0
1361	TRUE	Empty	RecName: Full=UPF0358 protein SAOUHSC_01062	gi|122540584		10 kDa		0.15	INF	[]	unknown	0	3	0	0	0	0
1362	TRUE	Empty	RecName: Full=SsrA-binding protein	gi|122539962		18 kDa		0.72	1	[]	unknown	1	1	0	0	0	0
1363	TRUE	Empty	RecName: Full=Peroxide-responsive repressor PerR	gi|122540550		17 kDa		0.65	1	[]	unknown	2	2	0	0	0	0
1364	TRUE	Empty	hypothetical protein SAOUHSC_02016 [Staphylococcus aureus subsp. aureus NCTC 8325]	gi|88195704		8 kDa	TRUE	1	INF	[]	unknown	0	0	1	0	1	0
1365	TRUE	Empty	MULTISPECIES: hypothetical protein [Bacteria]	gi|446647879		28 kDa		0.47	0	[]	unknown	1	0	0	0	2	1
1366	TRUE	Empty	SecY [Staphylococcus aureus subsp. aureus NCTC 8325]	gi|2078382		48 kDa	TRUE	1	INF	[]	unknown	0	0	0	0	0	0
1367	TRUE	Empty	ribosomal small subunit pseudouridine synthase A [Staphylococcus aureus subsp. aureus NCTC 8325]	gi|88195567		27 kDa		0.65	1	[]	unknown	2	2	2	1	0	0
1368	TRUE	Empty	hypothetical protein SAOUHSC_00676 [Staphylococcus aureus subsp. aureus NCTC 8325]	gi|88194441		18 kDa		0.54	2	[]	unknown	1	2	1	0	0	0
1369	TRUE	Empty	MULTISPECIES: hypothetical protein [Staphylococcus]	gi|446137043		7 kDa		0.43	0.8	[]	unknown	6	5	4	2	1	0
1370	TRUE	Empty	ABC transporter ATP-binding protein [Staphylococcus aureus]	gi|446833763		25 kDa		0.47	0	[]	unknown	1	0	0	0	0	0
1371	TRUE	Empty	MULTISPECIES: staphostatin A [Bacteria]	gi|446357078		13 kDa		0.54	2	[]	unknown	1	2	0	2	0	0
1372	TRUE	Empty	MULTISPECIES: hypothetical protein [Bacteria]	gi|446721654		14 kDa		0.57	1	[]	unknown	4	4	1	0	0	0
1373	TRUE	Empty	hypothetical protein SAOUHSC_01803 [Staphylococcus aureus subsp. aureus NCTC 8325]	gi|88195503		50 kDa	TRUE	1	INF	[]	unknown	0	0	1	0	0	0
1374	TRUE	Empty	hypothetical protein SAOUHSC_01190 [Staphylococcus aureus subsp. aureus NCTC 8325]	gi|88194929		24 kDa		1	INF	[]	unknown	0	0	2	0	0	0
1375	TRUE	Empty	MULTISPECIES: hypothetical protein [Bacteria]	gi|446619788		9 kDa		1	INF	[]	unknown	0	0	2	0	0	0
1376	TRUE	Empty	hypothetical protein SAOUHSC_00604 [Staphylococcus aureus subsp. aureus NCTC 8325]	gi|88194374		20 kDa		0.54	2	[]	unknown	1	2	1	0	0	0
1377	TRUE	Empty	ribulose-phosphate 3-epimerase [Staphylococcus aureus subsp. aureus NCTC 8325]	gi|88194928		24 kDa		0.47	0	[]	unknown	1	0	0	0	0	0
1378	TRUE	Empty	L-lactate permease [Staphylococcus aureus subsp. aureus NCTC 8325]	gi|88196288		57 kDa	TRUE	0.52	1	[]	unknown	7	7	0	0	0	0
1379	TRUE	Empty	MULTISPECIES: hypothetical protein [Bacteria]	gi|446192068		13 kDa		0.47	0	[]	unknown	1	0	1	0	0	0
1380	TRUE	Empty	ABC transporter [Staphylococcus aureus subsp. aureus NCTC 8325]	gi|88195641		26 kDa		0.22	4	[]	unknown	1	4	0	0	1	0
1381	TRUE	Empty	hypothetical protein SAOUHSC_02135 [Staphylococcus aureus subsp. aureus NCTC 8325]	gi|88195815		29 kDa		0.15	0.2	[]	unknown	4	1	1	1	0	0
1382	TRUE	Empty	MULTISPECIES: mRNA interferase MazF [Bacteria]	gi|446543829		13 kDa		0.45	0.7	[]	unknown	3	2	1	1	0	0
1383	TRUE	Empty	hypothetical protein [Staphylococcus aureus subsp. aureus NCTC 8325]	gi|3892893		30 kDa		0.53	INF	[]	unknown	0	1	1	0	1	0
1384	TRUE	Empty	molybdopterin-guanine dinucleotide biosynthesis protein MobB [Staphylococcus aureus subsp. aureus NCTC 8325]	gi|88196187		19 kDa		0.47	0	[]	unknown	1	0	1	1	0	0
1385	TRUE	Empty	nisin susceptibility-associated DNA-binding response regulator [Staphylococcus aureus subsp. aureus NCTC 8325]	gi|88196579		25 kDa		0.54	2	[]	unknown	1	2	1	0	0	0
1386	TRUE	Empty	RecName: Full=UPF0223 protein SAOUHSC_01044	gi|122540569		11 kDa		0.53	INF	[]	unknown	0	1	0	0	0	0
1387	TRUE	Empty	MULTISPECIES: zinc metallopeptidase [Bacteria]	gi|487744219		25 kDa		1	INF	[]	unknown	0	0	0	0	0	0
1388	TRUE	Empty	hypothetical protein SAOUHSC_03028 [Staphylococcus aureus subsp. aureus NCTC 8325]	gi|88196646		18 kDa		0.45	0.7	[]	unknown	3	2	2	2	2	0
1389	TRUE	Empty	RecName: Full=Holo-[acyl-carrier-protein] synthase; Short=Holo-ACP synthase; AltName: Full=4'-phosphopantetheinyl transferase AcpS	gi|6225004		14 kDa		0.47	0	[]	unknown	1	0	1	1	0	0
1390	TRUE	Empty	MULTISPECIES: MerR family transcriptional regulator [Bacteria]	gi|446772755		16 kDa		0.53	INF	[]	unknown	0	1	1	0	0	0
1391	TRUE	Empty	hypothetical protein SAOUHSC_00825 [Staphylococcus aureus subsp. aureus NCTC 8325]	gi|88194584		8 kDa		0.53	INF	[]	unknown	0	1	0	0	0	0
1392	TRUE	Empty	RecName: Full=Low molecular weight protein-tyrosine-phosphatase PtpB; AltName: Full=Phosphotyrosine phosphatase B; Short=PTPase B	gi|122538952		16 kDa		1	INF	[]	unknown	0	0	0	0	0	0
1393	TRUE	Empty	RecName: Full=3-hydroxyacyl-[acyl-carrier-protein] dehydratase FabZ; AltName: Full=(3R)-hydroxymyristoyl-[acyl-carrier-protein] dehydratase; Short=(3R)-hydroxymyristoyl-ACP dehydrase; AltName: Full=Beta-hydroxyacyl-ACP dehydratase	gi|122538959		16 kDa		1	INF	[]	unknown	0	0	0	0	0	0
1394	TRUE	Empty	RecName: Full=Immunodominant staphylococcal antigen B; Flags: Precursor	gi|122538554		19 kDa		1	INF	[]	unknown	0	0	1	0	0	0
1395	TRUE	Empty	hypothetical protein SAOUHSC_02995 [Staphylococcus aureus subsp. aureus NCTC 8325]	gi|88196614		22 kDa		0.53	INF	[]	unknown	0	1	0	0	0	0
1396	TRUE	Empty	hypothetical protein SAOUHSC_02832 [Staphylococcus aureus subsp. aureus NCTC 8325]	gi|88196466		24 kDa		0.47	0	[]	unknown	1	0	0	0	0	0
1397	TRUE	Empty	RecName: Full=Probable molybdenum cofactor guanylyltransferase; Short=MoCo guanylyltransferase; AltName: Full=GTP:molybdopterin guanylyltransferase; AltName: Full=Mo-MPT guanylyltransferase; AltName: Full=Molybdopterin guanylyltransferase; AltName: Full=Molybdopterin-guanine dinucleotide synthase; Short=MGD synthase	gi|122538842		23 kDa		0.47	0	[]	unknown	1	0	1	0	0	0
1398	TRUE	Empty	RecName: Full=Pyrrolidone-carboxylate peptidase; AltName: Full=5-oxoprolyl-peptidase; AltName: Full=Pyroglutamyl-peptidase I; Short=PGP-I; Short=Pyrase	gi|122538518		23 kDa		0.53	INF	[]	unknown	0	1	0	0	0	0
1399	TRUE	Empty	fibrinogen-binding protein-like protein [Staphylococcus aureus subsp. aureus NCTC 8325]	gi|88194856		13 kDa		1	INF	[]	unknown	0	0	0	0	0	0
1400	TRUE	Empty	MULTISPECIES: hypothetical protein [Bacteria]	gi|446255610		24 kDa		0.72	1	[]	unknown	1	1	0	0	0	0
1401	TRUE	Empty	MULTISPECIES: hypothetical protein [Bacteria]	gi|446650191		14 kDa		0.44	0.8	[]	unknown	4	3	2	1	0	0
1402	TRUE	Empty	MULTISPECIES: hypothetical protein [Bacteria]	gi|446488795		10 kDa		1	INF	[]	unknown	0	0	0	0	0	0
1403	TRUE	Empty	hypothetical protein SAOUHSC_01123 [Staphylococcus aureus subsp. aureus NCTC 8325]	gi|88194867		9 kDa		1	INF	[]	unknown	0	0	1	0	0	0
1404	TRUE	Empty	RecName: Full=L-lactate dehydrogenase 1; Short=L-LDH 1	gi|205438378		35 kDa	TRUE	0.5	1.1	[]	unknown	78	86	51	51	51	0
1405	TRUE	Empty	hypothetical protein SAOUHSC_01677 [Staphylococcus aureus subsp. aureus NCTC 8325]	gi|88195383		25 kDa		0.45	0.7	[]	unknown	3	2	2	2	0	0
1406	TRUE	Empty	MULTISPECIES: RNA-binding protein [Bacteria]	gi|446171792		9 kDa		0.29	0.5	[]	unknown	4	2	0	2	0	0
1407	TRUE	Empty	RecName: Full=UPF0346 protein SAOUHSC_01429	gi|122539571		9 kDa		1	INF	[]	unknown	0	0	0	0	0	0
1408	TRUE	Empty	MULTISPECIES: hypothetical protein [Staphylococcus]	gi|446281231		16 kDa		1	INF	[]	unknown	0	0	0	0	0	0
1409	TRUE	Empty	MULTISPECIES: thiamine-phosphate synthase [Bacteria]	gi|446405298		23 kDa		0.47	0	[]	unknown	1	0	0	0	0	0
1410	TRUE	Empty	hypothetical protein SAOUHSC_02836 [Staphylococcus aureus subsp. aureus NCTC 8325]	gi|88196469		19 kDa		0.47	0	[]	unknown	1	0	1	0	0	0
1411	TRUE	Empty	hypothetical protein SAOUHSC_00202 [Staphylococcus aureus subsp. aureus NCTC 8325]	gi|88194012		14 kDa		0.53	INF	[]	unknown	0	1	0	0	0	0
1412	TRUE	Empty	preprotein translocase subunit YajC [Staphylococcus aureus subsp. aureus NCTC 8325]	gi|88195449		10 kDa		0.65	1	[]	unknown	2	2	2	2	2	0
1413	TRUE	Empty	MULTISPECIES: hypothetical protein [Bacteria]	gi|446473922		21 kDa		0.47	0	[]	unknown	1	0	0	0	0	0
1414	TRUE	Empty	RecName: Full=Enoyl-[acyl-carrier-protein] reductase [NADPH] FabI; Short=ENR; AltName: Full=NADPH-dependent enoyl-ACP reductase	gi|122539868		28 kDa	TRUE	0.081	1.9	[]	unknown	14	26	44	14	6	0
1415	TRUE	Empty	fibrinogen-binding protein [Staphylococcus aureus]	gi|446714256		19 kDa		0.53	INF	[]	unknown	0	1	0	0	0	0
1416	TRUE	Empty	hypothetical protein [Staphylococcus aureus]	gi|446956715		21 kDa		0.47	0	[]	unknown	1	0	1	0	0	0
1417	TRUE	Empty	MULTISPECIES: hypothetical protein [Bacteria]	gi|446808749		15 kDa		0.55	1.5	[]	unknown	2	3	1	0	0	0
1418	TRUE	Empty	capsular polysaccharide biosynthesis protein O-acetyl transferase Cap5H [Staphylococcus aureus subsp. aureus NCTC 8325]	gi|88193934		23 kDa		0.47	0	[]	unknown	1	0	0	0	0	0
1419	TRUE	Empty	MULTISPECIES: LysR family transcriptional regulator [Bacteria]	gi|446326061		34 kDa		0.53	INF	[]	unknown	0	1	0	0	0	0
1420	TRUE	Empty	inositol monophosphatase family protein [Staphylococcus aureus subsp. aureus NCTC 8325]	gi|88194806		30 kDa		0.72	1	[]	unknown	1	1	2	0	0	0
1421	TRUE	Empty	RecName: Full=50S ribosomal protein L32	gi|158564264		7 kDa	TRUE	0.72	1	[]	unknown	1	1	1	1	1	0
1422	TRUE	Empty	RecName: Full=Urease subunit gamma; AltName: Full=Urea amidohydrolase subunit gamma	gi|122538829		11 kDa		1	INF	[]	unknown	0	0	0	0	0	0
1423	TRUE	Empty	MULTISPECIES: virulence factor EsxB [Staphylococcus]	gi|446431813		12 kDa		1	INF	[]	unknown	0	0	1	0	0	0
1424	TRUE	Empty	RecName: Full=Serine-protein kinase RsbW; AltName: Full=Anti-sigma-B factor; AltName: Full=Sigma-B negative effector RsbW	gi|114152144		18 kDa	TRUE	< 0.00010	0	1mM Cu low, TSB high	unknown	20	0	23	17	0	0
1425	TRUE	Empty	hypothetical protein SAOUHSC_02523 [Staphylococcus aureus subsp. aureus NCTC 8325]	gi|88196171		6 kDa		0.46	0.5	[]	unknown	2	1	2	0	0	0
1426	TRUE	Empty	DNA mismatch repair protein MutS, partial [Staphylococcus aureus]	gi|499766274		96 kDa	TRUE	0.44	1.2	[]	unknown	17	21	8	3	0	0
1427	TRUE	Empty	MULTISPECIES: hypothetical protein [Bacteria]	gi|447086829		19 kDa		0.47	0	[]	unknown	1	0	0	0	0	0
1428	TRUE	Empty	MULTISPECIES: molybdopterin synthase sulfur carrier subunit [Bacteria]	gi|446789715		9 kDa		0.72	1	[]	unknown	1	1	2	0	1	0
1429	TRUE	Empty	hypothetical protein SAOUHSC_01297 [Staphylococcus aureus subsp. aureus NCTC 8325]	gi|88195028		10 kDa		0.46	0.5	[]	unknown	2	1	3	0	0	0
1430	TRUE	Empty	hypothetical protein SAOUHSC_00468 [Staphylococcus aureus subsp. aureus NCTC 8325]	gi|88194255		14 kDa		0.53	INF	[]	unknown	0	1	0	1	2	0
1431	TRUE	Empty	MULTISPECIES: membrane protein [Bacteria]	gi|447144395		28 kDa		0.54	2	[]	unknown	1	2	1	1	0	0
1432	TRUE	Empty	MULTISPECIES: septation ring formation regulator EzrA [Bacteria]	gi|446167010		66 kDa	TRUE	0.039	0.7	[]	unknown	33	22	19	7	5	0
1433	TRUE	Empty	hypothetical protein SAOUHSC_01986 [Staphylococcus aureus subsp. aureus NCTC 8325]	gi|88195677		6 kDa		0.22	0	[]	unknown	2	0	0	0	0	0
1434	TRUE	Empty	MULTISPECIES: ferredoxin [Bacteria]	gi|447074741 (+1)		9 kDa		0.65	1	[]	unknown	2	2	0	2	2	2
1435	TRUE	Empty	MULTISPECIES: nucleoside diphosphate kinase [Bacteria]	gi|446364625		17 kDa		0.47	0	[]	unknown	1	0	0	0	0	0
1436	TRUE	Empty	conserved hypothetical protein [Staphylococcus aureus subsp. aureus NCTC 8325]	gi|87203518-DECOY		?	TRUE	0.47	0	[]	unknown	1	0	0	0	0	0
1437	TRUE	Empty	hypothetical protein SAOUHSC_01350 [Staphylococcus aureus subsp. aureus NCTC 8325]	gi|88195078		22 kDa		0.72	1	[]	unknown	1	1	0	0	0	0
1438	TRUE	Empty	MULTISPECIES: hypothetical protein [Bacteria]	gi|445994292		28 kDa		0.53	INF	[]	unknown	0	1	0	0	0	0
1439	TRUE	Empty	MULTISPECIES: rRNA methyltransferase [Bacteria]	gi|446687073		21 kDa		0.46	0.5	[]	unknown	2	1	2	0	0	0
1440	TRUE	Empty	tautomerase [Staphylococcus aureus]	gi|447046020		7 kDa		0.72	1	[]	unknown	1	1	2	0	0	0
1441	TRUE	Empty	hypothetical protein SAOUHSC_00917 [Staphylococcus aureus subsp. aureus NCTC 8325]	gi|88194674		19 kDa		0.54	2	[]	unknown	1	2	2	0	0	0
1442	TRUE	Empty	peptidase M23 [Staphylococcus aureus]	gi|446654298		28 kDa		1	INF	[]	unknown	0	0	0	0	1	1
1443	TRUE	Empty	hypothetical protein SAOUHSC_03041 [Staphylococcus aureus subsp. aureus NCTC 8325]	gi|88196657		20 kDa		0.46	0.5	[]	unknown	2	1	1	0	0	0
1444	TRUE	Empty	MULTISPECIES: membrane protein [Bacteria]	gi|446855849		40 kDa		0.72	1	[]	unknown	1	1	0	0	0	0
1445	TRUE	Empty	MULTISPECIES: hypothetical protein [Bacteria]	gi|445928031		8 kDa		0.45	0.7	[]	unknown	3	2	4	0	0	0
1446	TRUE	Empty	hypothetical protein SAOUHSC_00311 [Staphylococcus aureus subsp. aureus NCTC 8325]	gi|88194112		10 kDa		0.11	0	[]	unknown	3	0	0	0	0	0
1447	TRUE	Empty	MULTISPECIES: hypothetical protein [Bacteria]	gi|446925084		8 kDa		0.47	0	[]	unknown	1	0	1	0	0	0
1448	TRUE	Empty	hypothetical protein SAOUHSC_02271 [Staphylococcus aureus subsp. aureus NCTC 8325]	gi|88195941		8 kDa		0.54	2	[]	unknown	1	2	2	0	0	0
1449	TRUE	Empty	MULTISPECIES: XRE family transcriptional regulator [Bacteria]	gi|445928255		7 kDa	TRUE	0.35	3	[]	unknown	1	3	5	0	1	0
1450	TRUE	Empty	MULTISPECIES: diacylglyceryl transferase [Bacteria]	gi|446435453		32 kDa		0.47	0	[]	unknown	1	0	1	0	0	0
1451	TRUE	Empty	MULTISPECIES: membrane protein [Bacteria]	gi|446991241		32 kDa		1	INF	[]	unknown	0	0	0	0	0	0
1452	TRUE	Empty	hypothetical protein SAOUHSC_02771 [Staphylococcus aureus subsp. aureus NCTC 8325]	gi|88196407		14 kDa		0.47	0	[]	unknown	1	0	0	0	0	0
1453	TRUE	Empty	MULTISPECIES: glycerol-3-phosphate cytidylyltransferase [Bacteria]	gi|446755004		16 kDa	TRUE	0.72	1	[]	unknown	1	1	0	0	0	0
1454	TRUE	Empty	hypothetical protein SAOUHSC_01647 [Staphylococcus aureus subsp. aureus NCTC 8325]	gi|88195355		8 kDa		1	INF	[]	unknown	0	0	0	0	0	0
1455	TRUE	Empty	PTS mannose transporter subunit IIA [Staphylococcus aureus]	gi|447046911		13 kDa		0.47	0	[]	unknown	1	0	0	0	0	0
1456	TRUE	Empty	MULTISPECIES: membrane protein [Bacteria]	gi|446946779		13 kDa		0.47	0	[]	unknown	1	0	0	0	0	0
1457	TRUE	Empty	RecName: Full=Ribosomal RNA large subunit methyltransferase H; AltName: Full=23S rRNA (pseudouridine1915-N3)-methyltransferase; AltName: Full=23S rRNA m3Psi1915 methyltransferase; AltName: Full=rRNA (pseudouridine-N3-)-methyltransferase RlmH	gi|114154841		18 kDa	TRUE	0.45	0.7	[]	unknown	3	2	3	0	0	0
1458	TRUE	Empty	MULTISPECIES: acetolactate synthase [Bacteria]	gi|446119056		10 kDa		0.53	INF	[]	unknown	0	1	0	0	0	0
1459	TRUE	Empty	MULTISPECIES: membrane protein [Bacteria]	gi|447052217		10 kDa		0.53	INF	[]	unknown	0	1	1	0	0	0
1460	TRUE	Empty	MULTISPECIES: membrane protein [Bacteria]	gi|446560341-DECOY		?		1	INF	[]	unknown	0	0	0	0	0	0
1461	TRUE	Empty	membrane protein [Staphylococcus aureus]	gi|446320852		45 kDa	TRUE	0.53	INF	[]	unknown	0	1	0	0	0	0
1462	TRUE	Empty	RecName: Full=Phenol-soluble modulin alpha 2 peptide	gi|206557875		2 kDa	TRUE	< 0.00010	0.1	1mM Cu low, TSB high	unknown	18	2	0	0	0	0
END OF FILE

## Sheet: TSB 2.5mMCu to TSB
#150811_Waldron_whole_cells, Samples Report created on 05/03/2018
												Quantitative Value (Total Spectra)	Quantitative Value (Total Spectra)	Quantitative Value (Total Spectra)	Quantitative Value (Total Spectra)	Quantitative Value (Total Spectra)	Quantitative Value (Total Spectra)
150811_Waldron_whole_cells												TSB	TSB+1mM Cu	TSB+2.5mM Cu	TM	TM+1mM Cu	TM+1.5mM Cu
												TSB	TSB+1mM Cu	TSB+2.5mM Cu	TM	TM+1mM Cu	TM+1.5mM Cu
#	Visible?	Starred?	Identified Proteins (1462)	Accession Number	Alternate ID	Molecular Weight	Protein Grouping Ambiguity	Fisher's Exact Test (p-value): *(p < 0.00127)	Fold Change by Sample	Quantitative Profile	Taxonomy	150805_SH1000_TSB	150805_SH1000_TSB_1mMCuSO4	150805_SH1000_TSB_2mMCuSO4	150805_SH1000_TSB_TM	150805_SH1000_TSB_TM_1mMCuSO4	150805_SH1000_TSB_TM_2mMCuSO4
1	TRUE	Empty	MULTISPECIES: glyceraldehyde-3-phosphate dehydrogenase [Bacteria]	gi|446201559		36 kDa		< 0.00010	1.3	2.5mM Cu high, TSB low	unknown	498	700	633	413	369	162
2	TRUE	Empty	RecName: Full=Enolase; AltName: Full=2-phospho-D-glycerate hydro-lyase; AltName: Full=2-phosphoglycerate dehydratase	gi|119369401		47 kDa		0.0015	1.2	[]	unknown	744	805	863	377	300	123
3	TRUE	Empty	RecName: Full=Elongation factor Tu; Short=EF-Tu	gi|123098060		43 kDa	TRUE	< 0.00010	0.8	2.5mM Cu low, TSB high	unknown	635	766	493	602	456	97
4	TRUE	Empty	RecName: Full=Elongation factor G; Short=EF-G	gi|119368769		77 kDa		< 0.00010	0.7	2.5mM Cu low, TSB high	unknown	340	366	247	266	208	115
5	TRUE	Empty	RecName: Full=Elongation factor Ts; Short=EF-Ts	gi|123003472		32 kDa		0.16	0.9	[]	unknown	172	178	153	116	84	37
6	TRUE	Empty	RecName: Full=50S ribosomal protein L7/L12	gi|109940147		13 kDa	TRUE	0.0037	1.2	[]	unknown	326	421	399	394	273	106
7	TRUE	Empty	MULTISPECIES: alkaline shock protein 23 [Bacteria]	gi|446137381		19 kDa		0.13	0.9	[]	unknown	350	326	321	233	145	26
8	TRUE	Empty	RecName: Full=DNA-directed RNA polymerase subunit beta'; Short=RNAP subunit beta'; AltName: Full=RNA polymerase subunit beta'; AltName: Full=Transcriptase subunit beta'	gi|114152142		135 kDa	TRUE	0.00032	0.7	2.5mM Cu low, TSB high	unknown	200	190	137	141	114	74
9	TRUE	Empty	pyruvate dehydrogenase E1 component subunit beta [Staphylococcus aureus]	gi|445990321		35 kDa		0.013	1.2	[]	unknown	217	343	267	140	131	26
10	TRUE	Empty	RecName: Full=Cold shock protein CspA	gi|118572255		7 kDa	TRUE	0.51	1	[]	unknown	281	309	282	229	152	53
11	TRUE	Empty	RecName: Full=Chaperone protein DnaK; AltName: Full=HSP70; AltName: Full=Heat shock 70 kDa protein; AltName: Full=Heat shock protein 70	gi|122539397		66 kDa		0.32	1.1	[]	unknown	212	215	223	118	110	52
12	TRUE	Empty	RecName: Full=Pyruvate kinase; Short=PK	gi|122539317		63 kDa		0.35	1	[]	unknown	196	210	188	121	103	32
13	TRUE	Empty	MULTISPECIES: DNA-binding protein HU [Bacteria]	gi|446966607		10 kDa		0.15	1.1	[]	unknown	235	272	259	211	259	179
14	TRUE	Empty	fructose-bisphosphate aldolase [Staphylococcus aureus]	gi|446954157		33 kDa		< 0.00010	2.2	2.5mM Cu high, TSB low	unknown	143	327	319	85	98	78
15	TRUE	Empty	MULTISPECIES: fructose-bisphosphate aldolase [Staphylococcus]	gi|447054585		31 kDa		0.39	1	[]	unknown	173	181	167	152	133	35
16	TRUE	Empty	MULTISPECIES: transketolase [Bacteria]	gi|446403588		72 kDa	TRUE	< 0.00010	2	2.5mM Cu high, TSB low	unknown	144	191	287	94	113	76
17	TRUE	Empty	MULTISPECIES: DNA-directed RNA polymerase subunit beta [Bacteria]	gi|446841411		133 kDa	TRUE	0.072	0.8	[]	unknown	163	173	137	122	110	50
18	TRUE	Empty	RecName: Full=50S ribosomal protein L2	gi|42559187		30 kDa		0.047	1.3	[]	unknown	82	89	106	60	37	20
19	TRUE	Empty	RecName: Full=Extracellular matrix-binding protein ebh; AltName: Full=ECM-binding protein homolog; Flags: Precursor	gi|122539561		1030 kDa	TRUE	1	INF	[]	unknown	0	0	0	0	1	2
20	TRUE	Empty	branched-chain alpha-keto acid dehydrogenase subunit E2 [Staphylococcus aureus subsp. aureus NCTC 8325]	gi|88194794		46 kDa		0.14	0.9	[]	unknown	124	126	107	91	106	57
21	TRUE	Empty	pyruvate dehydrogenase E1 component subunit alpha [Staphylococcus aureus]	gi|445957465		41 kDa		0.0023	1.4	[]	unknown	130	193	181	110	87	22
22	TRUE	Empty	RecName: Full=Cell division protein FtsZ	gi|122539740		41 kDa		0.2	1.1	[]	unknown	109	148	123	63	34	5
23	TRUE	Empty	dihydrolipoamide dehydrogenase [Staphylococcus aureus subsp. aureus NCTC 8325]	gi|88194795		49 kDa		0.19	0.9	[]	unknown	156	159	140	117	124	39
24	TRUE	Empty	RecName: Full=Triosephosphate isomerase; Short=TIM; AltName: Full=Triose-phosphate isomerase	gi|122539967		27 kDa		0.0035	1.3	[]	unknown	166	202	220	86	69	38
25	TRUE	Empty	MULTISPECIES: 3-oxoacyl-ACP synthase II [Bacteria]	gi|446003385		44 kDa		0.067	1.2	[]	unknown	125	180	151	111	61	28
26	TRUE	Empty	RecName: Full=Bifunctional autolysin; Includes: RecName: Full=N-acetylmuramoyl-L-alanine amidase; Includes: RecName: Full=Mannosyl-glycoprotein endo-beta-N-acetylglucosaminidase; Flags: Precursor	gi|110832765		137 kDa	TRUE	< 0.00010	0.7	2.5mM Cu low, TSB high	unknown	226	273	151	83	83	48
27	TRUE	Empty	RecName: Full=Alkyl hydroperoxide reductase subunit C; AltName: Full=Peroxiredoxin; AltName: Full=Thioredoxin peroxidase	gi|60391219		21 kDa		< 0.00010	2.2	2.5mM Cu high, TSB low	unknown	57	88	125	27	28	29
28	TRUE	Empty	pyruvate carboxylase [Staphylococcus aureus subsp. aureus NCTC 8325]	gi|88194813		129 kDa	TRUE	0.27	1.1	[]	unknown	147	178	159	115	149	65
29	TRUE	Empty	ribosomal protein S2 [Staphylococcus aureus subsp. aureus NCTC 8325]	gi|87202523		28 kDa	TRUE	0.36	1.1	[]	unknown	125	161	132	98	70	26
30	TRUE	Empty	RecName: Full=Glycine--tRNA ligase; AltName: Full=Glycyl-tRNA synthetase; Short=GlyRS	gi|123291788		54 kDa		0.011	0.7	[]	unknown	151	196	113	70	63	21
31	TRUE	Empty	RecName: Full=Formate--tetrahydrofolate ligase; AltName: Full=Formyltetrahydrofolate synthetase; Short=FHS; Short=FTHFS	gi|122540563		60 kDa		0.00025	0.7	2.5mM Cu low, TSB high	unknown	176	204	116	107	92	25
32	TRUE	Empty	RecName: Full=3-hexulose-6-phosphate synthase; Short=HPS; AltName: Full=D-arabino-3-hexulose-6-phosphate formaldehyde lyase	gi|119370766		22 kDa		0.0022	1.3	[]	unknown	192	221	253	89	67	14
33	TRUE	Empty	MULTISPECIES: glutamine synthetase [Staphylococcus]	gi|447049347		51 kDa		0.36	0.9	[]	unknown	101	146	95	93	118	84
34	TRUE	Empty	RecName: Full=50S ribosomal protein L23	gi|123003430		11 kDa		0.042	1.4	[]	unknown	56	104	77	36	13	0
35	TRUE	Empty	MULTISPECIES: 6-phosphogluconate dehydrogenase decarboxylating [Bacteria]	gi|446115852		52 kDa		0.16	1.1	[]	unknown	107	144	123	93	84	38
36	TRUE	Empty	MULTISPECIES: trigger factor [Bacteria]	gi|446049718		49 kDa		0.23	0.9	[]	unknown	101	103	90	76	63	36
37	TRUE	Empty	RecName: Full=50S ribosomal protein L6	gi|119366648		20 kDa		0.37	1.1	[]	unknown	40	52	44	44	36	17
38	TRUE	Empty	molecular chaperone GroEL [Staphylococcus aureus]	gi|446162790		58 kDa	TRUE	0.02	1.3	[]	unknown	120	140	155	92	69	25
39	TRUE	Empty	MULTISPECIES: phosphate acetyltransferase [Bacteria]	gi|446696935		35 kDa		0.042	1.3	[]	unknown	107	142	135	92	91	44
40	TRUE	Empty	RecName: Full=30S ribosomal protein S6	gi|122540227		12 kDa		0.22	1.2	[]	unknown	59	66	69	32	35	11
41	TRUE	Empty	MULTISPECIES: 50S ribosomal protein L22 [Bacteria]	gi|446309672		13 kDa		0.18	1.2	[]	unknown	51	73	62	35	36	19
42	TRUE	Empty	RecName: Full=Polyribonucleotide nucleotidyltransferase; AltName: Full=Polynucleotide phosphorylase; Short=PNPase	gi|117940102		77 kDa		0.08	1.3	[]	unknown	72	85	91	53	58	22
43	TRUE	Empty	RecName: Full=Isoleucine--tRNA ligase; AltName: Full=Isoleucyl-tRNA synthetase; Short=IleRS	gi|123407059		105 kDa		0.22	0.9	[]	unknown	77	93	67	46	49	23
44	TRUE	Empty	RecName: Full=50S ribosomal protein L1	gi|122540134		25 kDa		0.37	1.1	[]	unknown	62	60	67	56	52	19
45	TRUE	Empty	thiol peroxidase [Staphylococcus aureus]	gi|446058398		18 kDa	TRUE	0.0053	1.5	[]	unknown	76	90	112	62	40	26
46	TRUE	Empty	MULTISPECIES: aspartyl/glutamyl-tRNA(Asn/Gln) amidotransferase subunit B [Bacteria]	gi|446467516		54 kDa	TRUE	0.16	1.2	[]	unknown	79	96	93	60	49	18
47	TRUE	Empty	MULTISPECIES: transglycosylase IsaA [Bacteria]	gi|446673921		24 kDa		0.11	1.1	[]	unknown	177	152	202	142	144	23
48	TRUE	Empty	MULTISPECIES: 30S ribosomal protein S4 [Bacteria]	gi|446012657		23 kDa		0.036	0.7	[]	unknown	60	52	41	47	56	28
49	TRUE	Empty	Chain B, Structure Of Beta-Ketoacetyl-Coa Reductase (Fabg) From Staphylococcus Aureus Complex With Nadph	gi|374074229		27 kDa	TRUE	0.42	1	[]	unknown	88	93	92	63	59	17
50	TRUE	Empty	MULTISPECIES: Molecular chaperone Hsp31 and glyoxalase 3 [Bacteria]	gi|445998549		32 kDa		0.28	1.1	[]	unknown	140	170	151	23	30	19
51	TRUE	Empty	30S ribosomal protein S1 [Staphylococcus aureus subsp. aureus NCTC 8325]	gi|88195210		43 kDa		0.082	0.8	[]	unknown	105	102	85	64	75	49
52	TRUE	Empty	MULTISPECIES: cysteine synthase [Bacteria]	gi|445979739		33 kDa		< 0.00010	1.7	2.5mM Cu high, TSB low	unknown	86	195	150	42	48	20
53	TRUE	Empty	RecName: Full=Valine--tRNA ligase; AltName: Full=Valyl-tRNA synthetase; Short=ValRS	gi|122539344		102 kDa		0.37	1.1	[]	unknown	63	66	68	35	38	17
54	TRUE	Empty	MULTISPECIES: 50S ribosomal protein L15 [Bacteria]	gi|446688728		16 kDa		0.32	1.1	[]	unknown	72	88	79	49	47	6
55	TRUE	Empty	MULTISPECIES: malate:quinone oxidoreductase [Bacteria]	gi|447052795		56 kDa		0.14	0.8	[]	unknown	82	90	68	53	48	10
56	TRUE	Empty	RecName: Full=2,3-bisphosphoglycerate-dependent phosphoglycerate mutase; Short=BPG-dependent PGAM; Short=PGAM; Short=Phosphoglyceromutase; Short=dPGM	gi|122538743		27 kDa		0.0034	0.6	[]	unknown	98	86	63	29	61	31
57	TRUE	Empty	MULTISPECIES: formate acetyltransferase [Bacteria]	gi|446817404		85 kDa		< 0.00010	0.1	2.5mM Cu low, TSB high	unknown	198	147	25	24	3	0
58	TRUE	Empty	RecName: Full=Catalase	gi|126215678		58 kDa	TRUE	0.031	1.4	[]	unknown	58	85	81	27	28	26
59	TRUE	Empty	RecName: Full=ATP synthase subunit beta; AltName: Full=ATP synthase F1 sector subunit beta; AltName: Full=F-ATPase subunit beta	gi|118573755		51 kDa		0.057	0.7	[]	unknown	68	60	50	62	54	14
60	TRUE	Empty	RecName: Full=Glutamyl-tRNA(Gln) amidotransferase subunit A; Short=Glu-ADT subunit A	gi|122539112		53 kDa		0.0072	1.5	[]	unknown	69	95	102	58	36	6
61	TRUE	Empty	RecName: Full=Acetate kinase; AltName: Full=Acetokinase	gi|122539308		44 kDa		0.35	0.9	[]	unknown	61	66	56	46	24	9
62	TRUE	Empty	MULTISPECIES: cold-shock protein [Bacteria]	gi|446981826		7 kDa	TRUE	0.0001	0.5	2.5mM Cu low, TSB high	unknown	70	74	32	61	7	0
63	TRUE	Empty	RecName: Full=Phosphoglycerate kinase	gi|122539968		43 kDa		0.3	0.9	[]	unknown	48	45	42	40	30	17
64	TRUE	Empty	RecName: Full=Glutamate--tRNA ligase; AltName: Full=Glutamyl-tRNA synthetase; Short=GluRS	gi|123291868		56 kDa		0.18	1.2	[]	unknown	53	58	64	41	36	13
65	TRUE	Empty	RecName: Full=50S ribosomal protein L13	gi|122538869		16 kDa		0.5	1	[]	unknown	46	44	45	39	29	0
66	TRUE	Empty	RecName: Full=ATP-dependent Clp protease ATP-binding subunit ClpC	gi|122063321		91 kDa	TRUE	0.016	1.4	[]	unknown	83	96	114	33	21	6
67	TRUE	Empty	RecName: Full=30S ribosomal protein S3	gi|123003431		24 kDa		0.44	1.1	[]	unknown	19	23	21	9	11	3
68	TRUE	Empty	MULTISPECIES: 30S ribosomal protein S16 [Bacteria]	gi|446190899		10 kDa		0.11	1.3	[]	unknown	55	93	70	41	33	5
69	TRUE	Empty	putative translaldolase [Staphylococcus aureus subsp. aureus NCTC 8325]	gi|88195596		26 kDa		0.0022	1.6	[]	unknown	70	88	109	31	24	10
70	TRUE	Empty	MULTISPECIES: 50S ribosomal protein L5 [Bacteria]	gi|447003568		20 kDa		0.21	0.9	[]	unknown	71	69	61	41	40	11
71	TRUE	Empty	RecName: Full=50S ribosomal protein L4	gi|122538859		22 kDa		0.41	1	[]	unknown	98	109	94	80	65	14
72	TRUE	Empty	RecName: Full=Alkyl hydroperoxide reductase subunit F	gi|3913011		55 kDa		< 0.00010	1.8	2.5mM Cu high, TSB low	unknown	80	126	141	23	16	11
73	TRUE	Empty	RecName: Full=Arginine--tRNA ligase; AltName: Full=Arginyl-tRNA synthetase; Short=ArgRS	gi|123291835		62 kDa		0.15	1.2	[]	unknown	57	69	70	44	35	12
74	TRUE	Empty	MULTISPECIES: phosphocarrier protein HPr [Bacteria]	gi|446359617		9 kDa		0.0068	0.7	[]	unknown	108	107	74	72	85	31
75	TRUE	Empty	Chain A, Crystal Structure Of Post-catalytic Binary Complex Of Phosphoglycerate Mutase From Staphylococcus Aureus	gi|817598861		57 kDa	TRUE	0.44	1	[]	unknown	70	70	73	25	19	10
76	TRUE	Empty	MULTISPECIES: thioredoxin reductase [Bacteria]	gi|446057108		34 kDa		0.37	1.1	[]	unknown	72	73	77	33	27	14
77	TRUE	Empty	MULTISPECIES: adenylate kinase [Bacteria]	gi|446944212		24 kDa		0.17	0.8	[]	unknown	52	47	42	37	47	13
78	TRUE	Empty	RecName: Full=Aspartate--tRNA ligase; AltName: Full=Aspartyl-tRNA synthetase; Short=AspRS	gi|123098030		67 kDa		0.31	1.1	[]	unknown	66	68	73	46	28	6
79	TRUE	Empty	RecName: Full=Uncharacterized protein SAOUHSC_00906	gi|122539893		33 kDa		0.00078	1.7	2.5mM Cu high, TSB low	unknown	60	103	101	56	39	10
80	TRUE	Empty	methionine--tRNA ligase [Staphylococcus aureus]	gi|446973871		75 kDa		0.46	1	[]	unknown	56	56	54	38	26	15
81	TRUE	Empty	aconitate hydratase [Staphylococcus aureus]	gi|446652398		99 kDa		0.18	0.8	[]	unknown	53	41	43	26	13	5
82	TRUE	Empty	MULTISPECIES: serine--tRNA ligase [Bacteria]	gi|446807078		49 kDa		0.33	1.1	[]	unknown	61	61	67	35	31	13
83	TRUE	Empty	RecName: Full=Phosphoribosylformylglycinamidine synthase subunit PurL; Short=FGAM synthase; AltName: Full=Formylglycinamide ribonucleotide amidotransferase subunit II; Short=FGAR amidotransferase II; Short=FGAR-AT II; AltName: Full=Glutamine amidotransferase PurL; AltName: Full=Phosphoribosylformylglycinamidine synthase subunit II	gi|123098049		80 kDa		0.021	0.7	[]	unknown	97	126	70	75	58	9
84	TRUE	Empty	RecName: Full=Lysine--tRNA ligase; AltName: Full=Lysyl-tRNA synthetase; Short=LysRS	gi|123098061		57 kDa		0.3	1.1	[]	unknown	60	66	67	38	31	16
85	TRUE	Empty	MULTISPECIES: 30S ribosomal protein S9 [Bacteria]	gi|487706315		15 kDa	TRUE	0.038	1.4	[]	unknown	59	88	81	67	52	14
86	TRUE	Empty	RecName: Full=30S ribosomal protein S7	gi|110282992		18 kDa		0.54	1	[]	unknown	47	54	47	45	42	33
87	TRUE	Empty	leucyl-tRNA synthetase [Staphylococcus aureus]	gi|447031476		92 kDa	TRUE	0.23	1.2	[]	unknown	52	63	61	38	26	10
88	TRUE	Empty	RecName: Full=UPF0342 protein SAOUHSC_01977	gi|122539212		13 kDa		0.26	1.1	[]	unknown	69	99	78	52	63	43
89	TRUE	Empty	SecA [Staphylococcus aureus subsp. aureus NCTC 8325]	gi|2078390		96 kDa	TRUE	0.53	1	[]	unknown	57	68	57	36	21	2
90	TRUE	Empty	ribonucleotide-diphosphate reductase subunit alpha [Staphylococcus aureus subsp. aureus NCTC 8325]	gi|88194507		83 kDa		0.25	1.1	[]	unknown	66	65	75	18	11	3
91	TRUE	Empty	oligoendopeptidase F [Staphylococcus aureus]	gi|446004876		70 kDa		0.5	1	[]	unknown	52	55	51	32	25	15
92	TRUE	Empty	lactate dehydrogenase [Staphylococcus aureus]	gi|446954630		35 kDa	TRUE	0.0091	0.6	[]	unknown	75	83	48	49	49	12
93	TRUE	Empty	MULTISPECIES: glucose-6-phosphate 1-dehydrogenase [Bacteria]	gi|446027215		57 kDa		0.25	1.2	[]	unknown	51	61	59	28	22	16
94	TRUE	Empty	peptidase M29 [Staphylococcus aureus]	gi|446108411		47 kDa		0.16	1.2	[]	unknown	56	58	68	45	37	20
95	TRUE	Empty	phosphoenolpyruvate-protein phosphotransferase [Staphylococcus aureus subsp. aureus NCTC 8325]	gi|88194782		63 kDa		0.062	1.3	[]	unknown	73	80	94	56	41	13
96	TRUE	Empty	RecName: Full=50S ribosomal protein L10	gi|122540133		18 kDa		0.42	0.9	[]	unknown	54	69	51	51	40	19
97	TRUE	Empty	DNA polymerase I [Staphylococcus aureus subsp. aureus NCTC 8325]	gi|88195497		99 kDa		0.54	1	[]	unknown	52	59	52	21	15	2
98	TRUE	Empty	RecName: Full=Putative dipeptidase SAOUHSC_01868	gi|122539278		53 kDa		0.22	1.2	[]	unknown	50	73	59	39	34	15
99	TRUE	Empty	MULTISPECIES: glucosamine-6-phosphate isomerase [Bacteria]	gi|447173968		22 kDa		0.19	0.8	[]	unknown	60	58	50	36	40	13
100	TRUE	Empty	MULTISPECIES: inosine-5-monophosphate dehydrogenase [Staphylococcus]	gi|446186216		53 kDa		0.018	1.5	[]	unknown	44	54	67	23	17	9
101	TRUE	Empty	RecName: Full=50S ribosomal protein L21	gi|119365986		11 kDa		0.54	1	[]	unknown	51	58	51	38	50	16
102	TRUE	Empty	MULTISPECIES: general stress protein [Bacteria]	gi|446085428		19 kDa		0.12	1.2	[]	unknown	72	94	88	51	28	7
103	TRUE	Empty	MULTISPECIES: thioredoxin [Bacteria]	gi|446941672		11 kDa		0.27	1.1	[]	unknown	57	60	65	28	28	22
104	TRUE	Empty	RecName: Full=Putative aldehyde dehydrogenase SAOUHSC_02363	gi|122538947		52 kDa		0.091	1.3	[]	unknown	63	71	80	32	24	6
105	TRUE	Empty	RecName: Full=50S ribosomal protein L3	gi|123291758		24 kDa		0.38	1.2	[]	unknown	18	30	21	27	29	6
106	TRUE	Empty	RecName: Full=Threonine--tRNA ligase; AltName: Full=Threonyl-tRNA synthetase; Short=ThrRS	gi|123003455		74 kDa		0.46	1	[]	unknown	61	62	59	40	22	2
107	TRUE	Empty	RecName: Full=30S ribosomal protein S13	gi|122538866		14 kDa		0.13	0.8	[]	unknown	55	51	43	62	59	27
108	TRUE	Empty	RecName: Full=DNA topoisomerase 4 subunit A; AltName: Full=Topoisomerase IV subunit A	gi|114152111		91 kDa		0.5	1.1	[]	unknown	15	20	16	16	10	5
109	TRUE	Empty	RecName: Full=Succinyl-CoA ligase [ADP-forming] subunit beta; AltName: Full=Succinyl-CoA synthetase subunit beta; Short=SCS-beta	gi|122539701		42 kDa		0.033	0.7	[]	unknown	77	71	55	50	46	17
110	TRUE	Empty	RecName: Full=Translation initiation factor IF-2	gi|123407128		78 kDa		0.29	0.9	[]	unknown	63	76	56	55	30	15
111	TRUE	Empty	RecName: Full=GMP synthase [glutamine-hydrolyzing]; AltName: Full=GMP synthetase; AltName: Full=Glutamine amidotransferase	gi|122540206		58 kDa		0.2	0.8	[]	unknown	50	47	41	23	12	4
112	TRUE	Empty	MULTISPECIES: peptidyl-prolyl cis-trans isomerase [Bacteria]	gi|445957203		22 kDa		0.0049	1.8	[]	unknown	31	70	56	17	16	7
113	TRUE	Empty	MULTISPECIES: ribonuclease J 1 [Bacteria]	gi|446734119		63 kDa		0.12	1.3	[]	unknown	52	69	66	42	27	13
114	TRUE	Empty	RecName: Full=Pyridoxal 5'-phosphate synthase subunit PdxS; Short=PLP synthase subunit PdxS; AltName: Full=Pdx1	gi|122540138		32 kDa		0.055	1.4	[]	unknown	47	52	65	45	29	7
115	TRUE	Empty	RecName: Full=50S ribosomal protein L18	gi|115504959		13 kDa		0.36	1.1	[]	unknown	31	46	35	34	8	0
116	TRUE	Empty	RecName: Full=Carbamoyl-phosphate synthase large chain; AltName: Full=Carbamoyl-phosphate synthetase ammonia chain	gi|122539724		117 kDa		0.051	0.7	[]	unknown	57	57	40	38	29	5
117	TRUE	Empty	hydroxymethylglutaryl-CoA synthase [Staphylococcus aureus]	gi|446074119 (+1)		43 kDa		0.46	1	[]	unknown	69	82	67	41	26	7
118	TRUE	Empty	nicotinate phosphoribosyltransferase, putative [Staphylococcus aureus subsp. aureus NCTC 8325]	gi|87203371		55 kDa		0.25	0.8	[]	unknown	45	45	38	27	24	6
119	TRUE	Empty	RecName: Full=Proline--tRNA ligase; AltName: Full=Prolyl-tRNA synthetase; Short=ProRS	gi|114152255		64 kDa		0.38	1.1	[]	unknown	48	48	52	31	20	1
120	TRUE	Empty	RecName: Full=Alanine--tRNA ligase; AltName: Full=Alanyl-tRNA synthetase; Short=AlaRS	gi|122539371		99 kDa		0.41	0.9	[]	unknown	45	50	42	24	28	4
121	TRUE	Empty	branched-chain-amino acid aminotransferase [Staphylococcus aureus]	gi|445998181		40 kDa		0.059	1.4	[]	unknown	50	72	68	33	23	12
122	TRUE	Empty	MULTISPECIES: 30S ribosomal protein S19 [Bacteria]	gi|446046498		11 kDa		0.42	0.9	[]	unknown	14	16	12	15	37	3
123	TRUE	Empty	RecName: Full=Aerobic glycerol-3-phosphate dehydrogenase	gi|122063486		62 kDa		0.015	0.6	[]	unknown	58	49	36	21	19	1
124	TRUE	Empty	RecName: Full=D-alanine--poly(phosphoribitol) ligase subunit 1; AltName: Full=D-alanine-D-alanyl carrier protein ligase; Short=DCL; AltName: Full=D-alanine-activating enzyme; Short=DAE	gi|122539917		55 kDa		0.0025	1.8	[]	unknown	39	67	69	28	56	39
125	TRUE	Empty	betaine aldehyde dehydrogenase [Staphylococcus aureus subsp. aureus NCTC 8325]	gi|88196560		55 kDa		0.5	1	[]	unknown	46	52	47	5	5	0
126	TRUE	Empty	RecName: Full=ATP-dependent Clp protease ATP-binding subunit ClpL	gi|119368567		78 kDa		0.26	0.9	[]	unknown	103	93	93	26	21	0
127	TRUE	Empty	glutamine--fructose-6-phosphate aminotransferase [isomerizing] [Staphylococcus aureus]	gi|446256610		66 kDa		0.26	0.9	[]	unknown	47	52	40	30	23	8
128	TRUE	Empty	hypothetical protein SAOUHSC_00144 [Staphylococcus aureus subsp. aureus NCTC 8325]	gi|88193956		273 kDa		< 0.00010	0	2.5mM Cu low, TSB high	unknown	18	16	0	3	0	0
129	TRUE	Empty	MULTISPECIES: DNA-directed RNA polymerase subunit alpha [Bacteria]	gi|446491795		35 kDa		0.54	1	[]	unknown	41	48	41	47	31	20
130	TRUE	Empty	CoA disulfide reductase [Staphylococcus aureus]	gi|447047269		49 kDa		0.0095	1.6	[]	unknown	40	41	65	16	7	3
131	TRUE	Empty	ATP-dependent Clp protease ATP-binding subunit ClpB [Staphylococcus aureus]	gi|446276115		98 kDa	TRUE	0.053	1.4	[]	unknown	46	45	64	15	11	2
132	TRUE	Empty	RecName: Full=3-oxoacyl-[acyl-carrier-protein] synthase 3; AltName: Full=3-oxoacyl-[acyl-carrier-protein] synthase III; AltName: Full=Beta-ketoacyl-ACP synthase III; Short=KAS III	gi|122539881		34 kDa		0.5	1	[]	unknown	44	49	45	40	34	5
133	TRUE	Empty	MULTISPECIES: DNA polymerase III subunit beta [Bacteria]	gi|446892555		42 kDa		0.17	1.2	[]	unknown	47	61	58	23	12	0
134	TRUE	Empty	RecName: Full=50S ribosomal protein L27	gi|122539354		10 kDa		0.33	0.8	[]	unknown	26	30	22	5	3	2
135	TRUE	Empty	acetolactate synthase [Staphylococcus aureus subsp. aureus NCTC 8325]	gi|88196120		61 kDa		0.087	0.8	[]	unknown	79	79	62	6	3	0
136	TRUE	Empty	MULTISPECIES: elongation factor P [Bacteria]	gi|446549158		21 kDa		0.2	0.8	[]	unknown	29	25	22	19	35	7
137	TRUE	Empty	DNA topoisomerase 1 [Staphylococcus aureus]	gi|446697442		79 kDa		0.56	1	[]	unknown	18	23	18	11	10	0
138	TRUE	Empty	RecName: Full=CTP synthase; AltName: Full=CTP synthetase; AltName: Full=UTP--ammonia ligase	gi|119391183		60 kDa		0.25	0.8	[]	unknown	44	37	37	32	24	8
139	TRUE	Empty	hypothetical protein SAOUHSC_01974 [Staphylococcus aureus subsp. aureus NCTC 8325]	gi|88195665		114 kDa	TRUE	0.046	0.4	[]	unknown	16	12	7	4	1	0
140	TRUE	Empty	RecName: Full=Adenylosuccinate lyase; Short=ASL; AltName: Full=Adenylosuccinase; Short=ASase	gi|117940103		50 kDa		0.044	0.7	[]	unknown	47	51	31	48	33	9
141	TRUE	Empty	RecName: Full=30S ribosomal protein S5	gi|122538863		18 kDa		0.17	0.8	[]	unknown	52	51	42	36	27	8
142	TRUE	Empty	RecName: Full=50S ribosomal protein L16	gi|115502796		16 kDa		0.21	0.7	[]	unknown	22	20	16	15	14	0
143	TRUE	Empty	MULTISPECIES: Fe-S cluster assembly ATPase SufC [Bacteria]	gi|446090990		28 kDa		0.45	1	[]	unknown	42	44	40	24	11	2
144	TRUE	Empty	RecName: Full=UPF0051 protein SAOUHSC_00851	gi|122539931		53 kDa		0.5	1	[]	unknown	45	47	46	33	29	6
145	TRUE	Empty	RecName: Full=Probable manganese-dependent inorganic pyrophosphatase; AltName: Full=Pyrophosphate phospho-hydrolase; Short=PPase	gi|122539107		34 kDa		0.46	1	[]	unknown	54	60	52	26	19	11
146	TRUE	Empty	RecName: Full=Bifunctional purine biosynthesis protein PurH; Includes: RecName: Full=Phosphoribosylaminoimidazolecarboxamide formyltransferase; AltName: Full=AICAR transformylase; Includes: RecName: Full=IMP cyclohydrolase; AltName: Full=ATIC; AltName: Full=IMP synthase; AltName: Full=Inosinicase	gi|122539822		54 kDa		0.053	0.7	[]	unknown	65	63	47	51	34	11
147	TRUE	Empty	RecName: Full=Transcriptional regulator SarA; AltName: Full=Staphylococcal accessory regulator A	gi|114152150		15 kDa		0.34	1.1	[]	unknown	43	47	48	41	35	13
148	TRUE	Empty	S1 RNA-binding domain-containing protein [Staphylococcus aureus subsp. aureus NCTC 8325]	gi|88195963		81 kDa	TRUE	0.42	1.1	[]	unknown	42	46	45	21	16	4
149	TRUE	Empty	MULTISPECIES: purine nucleoside phosphorylase [Bacteria]	gi|446082449		26 kDa		0.25	1.2	[]	unknown	25	28	31	23	14	9
150	TRUE	Empty	RecName: Full=50S ribosomal protein L11	gi|60393643		15 kDa		0.31	1.2	[]	unknown	31	43	36	35	32	16
151	TRUE	Empty	RecName: Full=Ribonuclease J 2; Short=RNase J2	gi|147742895		63 kDa	TRUE	0.12	1.5	[]	unknown	19	22	28	14	14	3
152	TRUE	Empty	RecName: Full=DNA gyrase subunit A	gi|114149316		99 kDa		0.32	0.9	[]	unknown	39	32	34	24	14	2
153	TRUE	Empty	Chain N, Crystal Structure Of Clpp From Staphylococcus Aureus In The Active, Extended Conformation	gi|374977815 (+1)		23 kDa		0.0059	1.9	[]	unknown	27	41	50	20	21	9
154	TRUE	Empty	RecName: Full=UPF0753 protein SAOUHSC_00413	gi|122540182		103 kDa		0.13	INF	[]	unknown	0	0	3	0	0	0
155	TRUE	Empty	MULTISPECIES: GTP-binding protein [Staphylococcus]	gi|446104799		69 kDa		0.22	0.8	[]	unknown	35	34	28	24	18	9
156	TRUE	Empty	RecName: Full=ATP-dependent Clp protease ATP-binding subunit ClpX	gi|122539337		46 kDa		0.046	1.6	[]	unknown	27	31	42	17	16	3
157	TRUE	Empty	MULTISPECIES: acetyl-CoA synthetase [Bacteria]	gi|447095084		60 kDa		0.3	0.9	[]	unknown	52	54	46	24	28	12
158	TRUE	Empty	RecName: Full=NADH dehydrogenase-like protein SAOUHSC_00878	gi|122539909		44 kDa		0.00012	0.5	2.5mM Cu low, TSB high	unknown	85	54	43	45	34	5
159	TRUE	Empty	RecName: Full=ATP-dependent helicase/nuclease subunit A; AltName: Full=ATP-dependent helicase/nuclease AddA	gi|122539894		141 kDa		0.22	0.7	[]	unknown	16	15	11	5	0	0
160	TRUE	Empty	glutamate synthase large subunit [Staphylococcus aureus subsp. aureus NCTC 8325]	gi|88194226		166 kDa		0.035	0.1	[]	unknown	7	18	1	8	7	2
161	TRUE	Empty	RecName: Full=Bifunctional protein FolD; Includes: RecName: Full=Methylenetetrahydrofolate dehydrogenase; Includes: RecName: Full=Methenyltetrahydrofolate cyclohydrolase	gi|119370053		31 kDa		0.021	0.7	[]	unknown	65	62	43	44	46	13
162	TRUE	Empty	RecName: Full=ATP-dependent DNA helicase PcrA	gi|110282982		84 kDa		0.43	0.9	[]	unknown	19	24	17	9	0	0
163	TRUE	Empty	MULTISPECIES: Fe-S cluster assembly protein SufD [Bacteria]	gi|446127717		49 kDa		0.17	1.4	[]	unknown	22	29	30	19	19	9
164	TRUE	Empty	RecName: Full=Phosphoglucosamine mutase	gi|84029255		49 kDa		0.32	1.1	[]	unknown	50	42	56	33	33	13
165	TRUE	Empty	1,4-dihydroxy-2-naphthoyl-CoA synthase [Staphylococcus aureus]	gi|446107092		30 kDa		0.18	1.2	[]	unknown	41	47	51	29	21	15
166	TRUE	Empty	SMC domain-containing protein [Staphylococcus aureus subsp. aureus NCTC 8325]	gi|88194941		137 kDa		0.058	0.6	[]	unknown	26	20	15	10	2	0
167	TRUE	Empty	UvrABC system protein A [Staphylococcus aureus]	gi|446585335		105 kDa		0.23	0.8	[]	unknown	27	30	21	17	10	0
168	TRUE	Empty	hypothetical protein SAOUHSC_01857 [Staphylococcus aureus subsp. aureus NCTC 8325]	gi|88195555		145 kDa		0.11	0.6	[]	unknown	16	14	9	8	4	0
169	TRUE	Empty	MULTISPECIES: DEAD/DEAH box family ATP-dependent RNA helicase [Bacteria]	gi|447101686		57 kDa		0.3	1.1	[]	unknown	43	59	49	26	16	2
170	TRUE	Empty	hypothetical protein SAOUHSC_02447 [Staphylococcus aureus subsp. aureus NCTC 8325]	gi|88196099		36 kDa		0.18	1.3	[]	unknown	26	32	34	13	12	6
171	TRUE	Empty	hypothetical protein SAOUHSC_01854 [Staphylococcus aureus subsp. aureus NCTC 8325]	gi|88195552		55 kDa		0.41	1.1	[]	unknown	39	37	42	24	9	0
172	TRUE	Empty	FMN oxidoreductase [Staphylococcus aureus subsp. aureus NCTC 8325]	gi|88194650		42 kDa		0.053	1.4	[]	unknown	46	58	64	9	5	1
173	TRUE	Empty	RecName: Full=Ribosome-recycling factor; Short=RRF; AltName: Full=Ribosome-releasing factor	gi|122539692		20 kDa		0.12	1.4	[]	unknown	31	41	42	25	33	16
174	TRUE	Empty	MULTISPECIES: adenylosuccinate synthetase [Bacteria]	gi|446017472		48 kDa		0.00011	0.4	2.5mM Cu low, TSB high	unknown	64	58	28	50	51	14
175	TRUE	Empty	penicillin-binding protein 2 [Staphylococcus aureus]	gi|446060496		80 kDa		0.16	0.8	[]	unknown	38	31	29	18	14	0
176	TRUE	Empty	RecName: Full=Copper chaperone CopZ	gi|122538627		7 kDa		< 0.00010	6.9	2.5mM Cu high, TSB low	unknown	26	190	180	3	31	16
177	TRUE	Empty	phenylalanine--tRNA ligase subunit beta [Staphylococcus aureus]	gi|446831726		89 kDa		0.34	1.1	[]	unknown	43	50	48	30	26	13
178	TRUE	Empty	NADP-dependent malic enzyme [Staphylococcus aureus subsp. aureus NCTC 8325]	gi|88195510		44 kDa		0.26	1.2	[]	unknown	28	32	34	26	22	12
179	TRUE	Empty	RecName: Full=30S ribosomal protein S8	gi|122538862		15 kDa		0.32	0.8	[]	unknown	23	15	19	14	7	2
180	TRUE	Empty	MULTISPECIES: UDP-N-acetylglucosamine 1-carboxyvinyltransferase 1 [Bacteria]	gi|446280151		45 kDa		0.087	0.7	[]	unknown	46	42	33	25	22	8
181	TRUE	Empty	type-1 restriction enzyme R protein [Staphylococcus aureus]	gi|446253492		109 kDa		0.28	1.8	[]	unknown	4	13	7	2	3	0
182	TRUE	Empty	MULTISPECIES: transcription termination factor NusA [Bacteria]	gi|446019607		44 kDa		0.4	0.9	[]	unknown	33	35	30	30	25	15
183	TRUE	Empty	MULTISPECIES: phosphoribosylformylglycinamidine synthase [Bacteria]	gi|446771094		10 kDa		0.01	0.6	[]	unknown	77	144	50	57	71	9
184	TRUE	Empty	MULTISPECIES: glycine dehydrogenase (decarboxylating) [Bacteria]	gi|446124334		55 kDa		0.23	1.2	[]	unknown	30	37	37	29	24	5
185	TRUE	Empty	MULTISPECIES: D-alanine aminotransferase [Bacteria]	gi|446333230		32 kDa		0.2	1.2	[]	unknown	41	43	50	47	39	29
186	TRUE	Empty	phosphoribosylamine--glycine ligase [Staphylococcus aureus subsp. aureus NCTC 8325]	gi|88194772		46 kDa		0.13	0.8	[]	unknown	44	40	33	51	54	33
187	TRUE	Empty	MULTISPECIES: peptidase M24 [Bacteria]	gi|446009252		39 kDa		0.056	1.5	[]	unknown	31	42	46	27	17	12
188	TRUE	Empty	RecName: Full=Probable glycine dehydrogenase (decarboxylating) subunit 1; AltName: Full=Glycine cleavage system P-protein subunit 1; AltName: Full=Glycine decarboxylase subunit 1; AltName: Full=Glycine dehydrogenase (aminomethyl-transferring) subunit 1	gi|122539428		50 kDa		0.36	1.1	[]	unknown	34	41	38	17	19	5
189	TRUE	Empty	glutamate-1-semialdehyde 2,1-aminomutase [Staphylococcus aureus]	gi|447193612		46 kDa		0.13	1.3	[]	unknown	40	42	52	32	20	8
190	TRUE	Empty	bifunctional acetaldehyde-CoA/alcohol dehydrogenase [Staphylococcus aureus subsp. aureus NCTC 8325]	gi|88193926		95 kDa		< 0.00010	0.1	2.5mM Cu low, TSB high	unknown	51	45	5	23	9	0
191	TRUE	Empty	RecName: Full=30S ribosomal protein S17	gi|118573211		10 kDa		0.42	0.8	[]	unknown	13	11	11	16	20	0
192	TRUE	Empty	RecName: Full=Asparagine--tRNA ligase; AltName: Full=Asparaginyl-tRNA synthetase; Short=AsnRS	gi|123291797		49 kDa		0.35	0.9	[]	unknown	35	42	31	21	16	6
193	TRUE	Empty	RecName: Full=DNA polymerase III PolC-type; Short=PolIII	gi|110808208		162 kDa	TRUE	0.34	0.5	[]	unknown	4	10	2	3	0	0
194	TRUE	Empty	RecName: Full=ATP-dependent 6-phosphofructokinase; Short=ATP-PFK; Short=Phosphofructokinase; AltName: Full=Phosphohexokinase	gi|678000067		35 kDa		0.067	0.7	[]	unknown	39	40	26	26	33	7
195	TRUE	Empty	MULTISPECIES: hydrolase [Bacteria]	gi|446371050		31 kDa		0.38	1.1	[]	unknown	41	45	45	22	16	2
196	TRUE	Empty	ABC transporter ATP-binding protein [Staphylococcus aureus subsp. aureus NCTC 8325]	gi|88195119		60 kDa		0.23	0.8	[]	unknown	36	36	29	28	20	7
197	TRUE	Empty	RecName: Full=Alcohol dehydrogenase; Short=ADH	gi|122540071		36 kDa		< 0.00010	0.3	2.5mM Cu low, TSB high	unknown	78	82	21	24	14	0
198	TRUE	Empty	MULTISPECIES: ATP synthase subunit alpha [Bacteria]	gi|446897625		55 kDa		0.18	0.8	[]	unknown	42	38	33	32	31	11
199	TRUE	Empty	RecName: Full=Putative 2-hydroxyacid dehydrogenase SAOUHSC_02577	gi|122538828		35 kDa		0.31	1.2	[]	unknown	31	40	36	28	22	5
200	TRUE	Empty	RecName: Full=Cysteine--tRNA ligase; AltName: Full=Cysteinyl-tRNA synthetase; Short=CysRS	gi|123291881		54 kDa		0.3	1.2	[]	unknown	26	35	31	16	13	1
201	TRUE	Empty	RecName: Full=50S ribosomal protein L17	gi|122538867		14 kDa		0.28	1.2	[]	unknown	32	35	38	23	22	18
202	TRUE	Empty	MULTISPECIES: phosphopentomutase [Bacteria]	gi|446119951		44 kDa		0.19	1.3	[]	unknown	35	41	44	25	19	9
203	TRUE	Empty	protein RecA [Staphylococcus aureus]	gi|446290311		38 kDa	TRUE	0.41	1.1	[]	unknown	36	48	39	27	19	9
204	TRUE	Empty	MULTISPECIES: transcriptional regulator [Bacteria]	gi|447206188		17 kDa		0.39	0.9	[]	unknown	28	25	25	15	9	2
205	TRUE	Empty	MULTISPECIES: ribonucleotide-diphosphate reductase subunit beta [Bacteria]	gi|446484644		38 kDa		0.068	1.5	[]	unknown	31	40	45	19	19	9
206	TRUE	Empty	MULTISPECIES: succinate dehydrogenase flavoprotein subunit [Bacteria]	gi|446741022		66 kDa		0.2	0.6	[]	unknown	14	12	9	4	6	2
207	TRUE	Empty	RecName: Full=Elongation factor 4; Short=EF-4; AltName: Full=Ribosomal back-translocase LepA	gi|119371400		68 kDa		0.5	1	[]	unknown	22	22	23	14	8	0
208	TRUE	Empty	MULTISPECIES: 2-oxoglutarate dehydrogenase E1 component [Bacteria]	gi|446102811		105 kDa		0.32	0.8	[]	unknown	24	24	20	19	13	0
209	TRUE	Empty	hypothetical protein SAOUHSC_02790 [Staphylococcus aureus subsp. aureus NCTC 8325]	gi|88196426		110 kDa		0.59	1	[]	unknown	10	14	10	2	1	0
210	TRUE	Empty	RecName: Full=Tyrosine--tRNA ligase; AltName: Full=Tyrosyl-tRNA synthetase; Short=TyrRS	gi|123407035		48 kDa		0.16	1.3	[]	unknown	28	40	37	25	20	6
211	TRUE	Empty	RecName: Full=Serine hydroxymethyltransferase; Short=SHMT; Short=Serine methylase	gi|122538954		45 kDa		0.17	0.8	[]	unknown	39	24	30	37	27	8
212	TRUE	Empty	glutamate-1-semialdehyde 2,1-aminomutase [Staphylococcus aureus]	gi|446934342		47 kDa	TRUE	0.16	1.3	[]	unknown	28	32	37	20	19	5
213	TRUE	Empty	RecName: Full=Methylenetetrahydrofolate--tRNA-(uracil-5-)-methyltransferase TrmFO; AltName: Full=Folate-dependent tRNA (uracil-5-)-methyltransferase; AltName: Full=Folate-dependent tRNA(M-5-U54)-methyltransferase	gi|122539696		48 kDa		0.38	1.1	[]	unknown	21	23	24	12	4	0
214	TRUE	Empty	RecName: Full=Glucose-6-phosphate isomerase; Short=GPI; AltName: Full=Phosphoglucose isomerase; Short=PGI; AltName: Full=Phosphohexose isomerase; Short=PHI	gi|116248076		50 kDa		0.5	1	[]	unknown	28	41	29	20	11	3
215	TRUE	Empty	MULTISPECIES: general stress protein [Bacteria]	gi|445993011		17 kDa		0.0033	2.3	[]	unknown	15	23	35	14	11	13
216	TRUE	Empty	MULTISPECIES: GTP pyrophosphokinase [Bacteria]	gi|446981327		84 kDa		0.094	0.5	[]	unknown	14	11	7	3	1	0
217	TRUE	Empty	hypothetical protein SAOUHSC_01383 [Staphylococcus aureus subsp. aureus NCTC 8325]	gi|88195110		69 kDa		0.041	1.6	[]	unknown	25	24	40	18	24	12
218	TRUE	Empty	deoxyribose-phosphate aldolase 2 [Staphylococcus aureus]	gi|447006055		23 kDa	TRUE	0.058	0.7	[]	unknown	54	33	38	24	20	10
219	TRUE	Empty	globin domain-containing protein [Staphylococcus aureus subsp. aureus NCTC 8325]	gi|88194014		43 kDa		0.36	0.9	[]	unknown	37	39	33	7	3	0
220	TRUE	Empty	RecName: Full=Uncharacterized protein SAOUHSC_02143	gi|122539104		39 kDa		0.2	1.3	[]	unknown	29	29	37	15	11	7
221	TRUE	Empty	hypothetical protein SAOUHSC_00486 [Staphylococcus aureus subsp. aureus NCTC 8325]	gi|88194271		78 kDa		0.5	1	[]	unknown	23	24	24	12	7	0
222	TRUE	Empty	RecName: Full=DNA ligase; AltName: Full=Polydeoxyribonucleotide synthase [NAD(+)]	gi|123098079		75 kDa		0.33	0.8	[]	unknown	26	25	22	15	15	0
223	TRUE	Empty	RecName: Full=DNA topoisomerase 3; AltName: Full=DNA topoisomerase III	gi|122538856		82 kDa		0.5	0.9	[]	unknown	16	14	15	13	7	0
224	TRUE	Empty	glycosyltransferase family 1 [Staphylococcus aureus]	gi|446641838		57 kDa	TRUE	0.34	2	[]	unknown	2	4	4	1	4	0
225	TRUE	Empty	MULTISPECIES: succinyl-CoA ligase subunit alpha [Staphylococcus]	gi|446032398		32 kDa		0.24	0.8	[]	unknown	41	40	34	37	33	5
226	TRUE	Empty	excinuclease ABC subunit B [Staphylococcus aureus]	gi|446151398		77 kDa	TRUE	0.5	1.2	[]	unknown	6	6	7	0	0	0
227	TRUE	Empty	bifunctional 3-deoxy-7-phosphoheptulonate synthase/chorismate mutase [Staphylococcus aureus subsp. aureus NCTC 8325]	gi|88195550		41 kDa		0.14	1.4	[]	unknown	23	32	32	11	10	4
228	TRUE	Empty	MULTISPECIES: GTP cyclohydrolase FolE2 [Bacteria]	gi|446056377		33 kDa		0.5	1	[]	unknown	20	20	21	9	2	1
229	TRUE	Empty	nitrate reductase subunit alpha [Staphylococcus aureus]	gi|446436536		140 kDa		0.0039	0	[]	unknown	8	6	0	0	0	0
230	TRUE	Empty	MULTISPECIES: dihydroorotase [Bacteria]	gi|446689682		46 kDa		0.46	1.1	[]	unknown	38	41	40	20	17	16
231	TRUE	Empty	MULTISPECIES: 50S ribosomal protein L19 [Staphylococcus]	gi|446103549		13 kDa		0.5	0.9	[]	unknown	19	18	18	11	9	3
232	TRUE	Empty	ABC transporter substrate-binding protein [Staphylococcus aureus]	gi|446660309		35 kDa		0.35	1.2	[]	unknown	26	27	30	11	29	11
233	TRUE	Empty	RecName: Full=DNA mismatch repair protein MutS	gi|110810486		100 kDa	TRUE	0.1	0.5	[]	unknown	15	19	8	3	1	0
234	TRUE	Empty	MULTISPECIES: Ornithine aminotransferase 2 [Bacteria]	gi|446089459		43 kDa		0.13	0.7	[]	unknown	24	26	16	22	20	7
235	TRUE	Empty	hypothetical protein SAOUHSC_00049 [Staphylococcus aureus subsp. aureus NCTC 8325]	gi|88193869		122 kDa		0.5	0.7	[]	unknown	3	1	2	0	0	0
236	TRUE	Empty	RecName: Full=Cell division protein FtsA	gi|150421554		53 kDa		0.28	0.9	[]	unknown	42	39	36	28	21	4
237	TRUE	Empty	glucose-specific phosphotransferase enzyme IIA component [Staphylococcus aureus]	gi|446395797		18 kDa		0.12	1.4	[]	unknown	24	36	34	17	15	9
238	TRUE	Empty	MULTISPECIES: translation initiation factor IF-3 [Bacteria]	gi|487706930		20 kDa	TRUE	0.44	0.9	[]	unknown	21	19	19	15	22	5
239	TRUE	Empty	hypothetical protein SAOUHSC_01455 [Staphylococcus aureus subsp. aureus NCTC 8325]	gi|88195174		133 kDa		0.5	1.1	[]	unknown	11	13	12	5	1	0
240	TRUE	Empty	MULTISPECIES: pyruvate oxidase [Bacteria]	gi|446985402		64 kDa		0.26	1.2	[]	unknown	28	40	34	6	6	1
241	TRUE	Empty	transcription-repair-coupling factor [Staphylococcus aureus]	gi|446076373		134 kDa		0.59	1	[]	unknown	10	14	10	0	0	0
242	TRUE	Empty	MULTISPECIES: malonyl CoA-ACP transacylase [Bacteria]	gi|445969493		34 kDa		0.55	1	[]	unknown	28	32	28	23	23	10
243	TRUE	Empty	MULTISPECIES: signal recognition particle protein [Bacteria]	gi|446786223		51 kDa		0.42	1.2	[]	unknown	10	12	12	9	4	0
244	TRUE	Empty	ribonuclease R [Staphylococcus aureus subsp. aureus NCTC 8325]	gi|88194563		90 kDa		0.32	0.8	[]	unknown	23	25	19	12	9	2
245	TRUE	Empty	MULTISPECIES: catabolite control protein A [Bacteria]	gi|446141211		36 kDa		0.54	1	[]	unknown	37	41	37	19	14	2
246	TRUE	Empty	RecName: Full=Lipid II:glycine glycyltransferase; AltName: Full=Factor essential for expression of methicillin resistance X	gi|110808232		49 kDa	TRUE	0.31	1.2	[]	unknown	16	21	20	11	10	3
247	TRUE	Empty	RecName: Full=Lipoteichoic acid synthase; Contains: RecName: Full=Glycerol phosphate lipoteichoic acid synthase; Short=LTA synthase; AltName: Full=Polyglycerol phosphate synthase; Contains: RecName: Full=Processed glycerol phosphate lipoteichoic acid synthase	gi|122540018		74 kDa		0.5	1	[]	unknown	23	25	22	10	11	11
248	TRUE	Empty	RecName: Full=Serine protease HtrA-like	gi|116248101		86 kDa	TRUE	0.34	0.5	[]	unknown	4	2	2	1	0	0
249	TRUE	Empty	hypothetical protein SAOUHSC_02121 [Staphylococcus aureus subsp. aureus NCTC 8325]	gi|88195802		45 kDa		0.62	1	[]	unknown	5	6	5	0	1	0
250	TRUE	Empty	RecName: Full=Nucleoid-associated protein SAOUHSC_00444	gi|122540161		12 kDa		0.5	0.8	[]	unknown	4	1	3	2	1	0
251	TRUE	Empty	RecName: Full=ATP-dependent helicase/deoxyribonuclease subunit B; AltName: Full=ATP-dependent helicase/nuclease AddB	gi|122539895		135 kDa		0.59	1	[]	unknown	9	8	9	3	3	1
252	TRUE	Empty	hypothetical protein SAOUHSC_01583 [Staphylococcus aureus subsp. aureus NCTC 8325]	gi|88195294		77 kDa	TRUE	0.66	1	[]	unknown	3	4	3	0	0	0
253	TRUE	Empty	RecName: Full=Putative universal stress protein SAOUHSC_01819	gi|123003452		18 kDa		0.014	0.6	[]	unknown	57	46	35	23	26	11
254	TRUE	Empty	MULTISPECIES: transcription elongation factor GreA [Bacteria]	gi|446353457		18 kDa		0.35	1.2	[]	unknown	26	31	30	22	17	11
255	TRUE	Empty	RecName: Full=Sensor protein SrrB; AltName: Full=Staphylococcal respiratory response protein B	gi|123003464		66 kDa		0.5	0	[]	unknown	1	1	0	0	0	0
256	TRUE	Empty	MULTISPECIES: uracil phosphoribosyltransferase [Bacteria]	gi|445970857		23 kDa		0.087	0.7	[]	unknown	39	30	27	24	20	6
257	TRUE	Empty	hypothetical protein SAOUHSC_00258 [Staphylococcus aureus subsp. aureus NCTC 8325]	gi|88194064		115 kDa		0.13	INF	[]	unknown	0	1	3	0	0	0
258	TRUE	Empty	MULTISPECIES: 2-C-methyl-D-erythritol 4-phosphate cytidylyltransferase [Bacteria]	gi|446795230		27 kDa	TRUE	0.35	1.1	[]	unknown	29	31	33	21	18	3
259	TRUE	Empty	hypothetical protein SAOUHSC_02158 [Staphylococcus aureus subsp. aureus NCTC 8325]	gi|88195838		48 kDa		0.4	0.9	[]	unknown	31	26	28	17	10	2
260	TRUE	Empty	MULTISPECIES: pyridoxal kinase [Bacteria]	gi|447108206		30 kDa		0.39	1.1	[]	unknown	23	33	26	15	11	3
261	TRUE	Empty	MULTISPECIES: heat-shock protein Hsp33 [Bacteria]	gi|446070750		32 kDa		0.44	0.9	[]	unknown	25	27	23	7	1	1
262	TRUE	Empty	MULTISPECIES: UDP-N-acetylglucosamine 1-carboxyvinyltransferase 2 [Bacteria]	gi|445968747		45 kDa		0.45	0.9	[]	unknown	32	29	30	16	11	3
263	TRUE	Empty	RecName: Full=DNA topoisomerase 4 subunit A; AltName: Full=Topoisomerase IV subunit A	gi|114152111-DECOY		?		0.5	INF	[]	unknown	0	1	1	0	0	0
264	TRUE	Empty	RecName: Full=Septation ring formation regulator EzrA	gi|123003451		66 kDa	TRUE	0.045	0.6	[]	unknown	32	22	19	7	5	0
265	TRUE	Empty	RecName: Full=Putative formate dehydrogenase SAOUHSC_02582	gi|123406992		111 kDa		0.00046	0.4	2.5mM Cu low, TSB high	unknown	37	15	13	10	4	0
266	TRUE	Empty	signal recognition particle-docking protein FtsY [Staphylococcus aureus subsp. aureus NCTC 8325]	gi|88194942		47 kDa		0.5	1	[]	unknown	31	33	30	16	11	1
267	TRUE	Empty	MULTISPECIES: 2-amino-3-ketobutyrate CoA ligase [Bacteria]	gi|446172969		43 kDa		0.29	0.8	[]	unknown	30	27	25	20	21	13
268	TRUE	Empty	RecName: Full=3-methyl-2-oxobutanoate hydroxymethyltransferase; AltName: Full=Ketopantoate hydroxymethyltransferase; Short=KPHMT	gi|158564267		29 kDa		0.5	1	[]	unknown	28	35	29	13	9	2
269	TRUE	Empty	RecName: Full=Acetyl-coenzyme A carboxylase carboxyl transferase subunit beta; Short=ACCase subunit beta; Short=Acetyl-CoA carboxylase carboxyltransferase subunit beta	gi|122539314		32 kDa		0.44	1.1	[]	unknown	20	19	22	18	11	2
270	TRUE	Empty	RecName: Full=Protein GrpE; AltName: Full=HSP-70 cofactor	gi|123291786		24 kDa		0.29	1.2	[]	unknown	36	43	42	27	23	11
271	TRUE	Empty	MULTISPECIES: cysteine desulfurase [Bacteria]	gi|446730415		46 kDa	TRUE	0.39	0.9	[]	unknown	26	24	23	18	12	1
272	TRUE	Empty	hypothetical protein SAOUHSC_01931 [Staphylococcus aureus subsp. aureus NCTC 8325]	gi|88195626		163 kDa		0.5	0	[]	unknown	1	0	0	0	0	0
273	TRUE	Empty	MULTISPECIES: lactate dehydrogenase [Bacteria]	gi|446083681		37 kDa		0.24	1.4	[]	unknown	13	12	18	4	8	2
274	TRUE	Empty	RecName: Full=D-alanine--D-alanine ligase; AltName: Full=D-Ala-D-Ala ligase; AltName: Full=D-alanylalanine synthetase	gi|122538976		40 kDa		0.55	1	[]	unknown	31	37	31	13	18	0
275	TRUE	Empty	hypothetical protein SAOUHSC_00228 [Staphylococcus aureus subsp. aureus NCTC 8325]	gi|88194035		66 kDa		0.11	0.6	[]	unknown	16	12	9	14	17	4
276	TRUE	Empty	RecName: Full=Glycine cleavage system H protein; AltName: Full=Octanoyl/lipoyl carrier protein	gi|122539943		14 kDa		0.013	1.9	[]	unknown	20	30	38	25	25	12
277	TRUE	Empty	RecName: Full=Delta-aminolevulinic acid dehydratase; Short=ALAD; Short=ALADH; AltName: Full=Porphobilinogen synthase	gi|110808549		37 kDa		0.45	0.9	[]	unknown	34	24	32	11	2	2
278	TRUE	Empty	RecName: Full=30S ribosomal protein S15	gi|118597468		11 kDa		< 0.00010	12	2.5mM Cu high, TSB low	unknown	2	0	24	64	28	9
279	TRUE	Empty	assimilatory nitrite reductase [NAD(P)H] large subunit [Staphylococcus aureus subsp. aureus NCTC 8325]	gi|88196324		89 kDa		< 0.00010	0.03	2.5mM Cu low, TSB high	unknown	32	25	1	10	2	0
280	TRUE	Empty	RecName: Full=Nuclease SbcCD subunit C	gi|190360283 (+1)		117 kDa		0.23	0.4	[]	unknown	5	4	2	2	0	0
281	TRUE	Empty	MULTISPECIES: ribose-phosphate pyrophosphokinase [Bacteria]	gi|446856518		35 kDa		0.5	1	[]	unknown	38	48	37	27	15	6
282	TRUE	Empty	acetyl-CoA acyltransferase [Staphylococcus aureus]	gi|446121215		42 kDa		0.21	0.8	[]	unknown	32	30	25	16	9	3
283	TRUE	Empty	RecName: Full=L-lactate dehydrogenase 2; Short=L-LDH 2	gi|123003514		34 kDa		0.17	1.3	[]	unknown	31	37	40	18	24	9
284	TRUE	Empty	hypothetical protein SAOUHSC_01266 [Staphylococcus aureus subsp. aureus NCTC 8325]	gi|88194999		65 kDa		0.5	1.2	[]	unknown	6	9	7	4	1	0
285	TRUE	Empty	MULTISPECIES: tRNA-binding protein [Bacteria]	gi|446971112		22 kDa		0.5	1	[]	unknown	30	29	29	27	18	5
286	TRUE	Empty	RecName: Full=tRNA uridine 5-carboxymethylaminomethyl modification enzyme MnmG; AltName: Full=Glucose-inhibited division protein A	gi|205831560		70 kDa		0.56	1	[]	unknown	19	16	19	10	4	0
287	TRUE	Empty	MULTISPECIES: penicillin-binding protein 3 [Bacteria]	gi|446842516		77 kDa		0.066	0.5	[]	unknown	15	16	7	3	3	0
288	TRUE	Empty	RecName: Full=UDP-N-acetylmuramoyl-L-alanyl-D-glutamate--L-lysine ligase; AltName: Full=L-lysine-adding enzyme; AltName: Full=UDP-MurNAc-L-Ala-D-Glu:L-Lys ligase; AltName: Full=UDP-MurNAc-tripeptide synthetase; AltName: Full=UDP-N-acetylmuramyl-tripeptide synthetase	gi|122539862		54 kDa		0.04	0.6	[]	unknown	35	30	21	17	17	5
289	TRUE	Empty	RecName: Full=ATP-dependent protease ATPase subunit HslU; AltName: Full=Unfoldase HslU	gi|123003474		52 kDa		0.12	0.7	[]	unknown	35	35	25	27	16	6
290	TRUE	Empty	RecName: Full=GTPase Obg; AltName: Full=GTP-binding protein Obg	gi|122539355		47 kDa		0.27	1.3	[]	unknown	18	26	23	17	14	4
291	TRUE	Empty	MULTISPECIES: stage V sporulation protein G [Bacteria]	gi|446791743		11 kDa		0.56	1	[]	unknown	24	16	24	22	16	7
292	TRUE	Empty	transcription-repair-coupling factor [Staphylococcus aureus]	gi|446076373-DECOY		?		1	INF	[]	unknown	0	0	0	0	0	0
293	TRUE	Empty	type I restriction-modification system subunit M [Staphylococcus aureus subsp. aureus NCTC 8325]	gi|88195628		67 kDa	TRUE	0.014	2.2	[]	unknown	13	22	28	9	15	1
294	TRUE	Empty	penicillin-binding protein [Staphylococcus aureus]	gi|447041407		83 kDa		0.59	1	[]	unknown	9	9	9	1	0	0
295	TRUE	Empty	RecName: Full=GTP-sensing transcriptional pleiotropic repressor CodY	gi|123003473		29 kDa		0.3	0.8	[]	unknown	32	37	27	9	10	4
296	TRUE	Empty	MULTISPECIES: 50S ribosomal protein L25 [Bacteria]	gi|446079795		24 kDa		0.31	1.2	[]	unknown	31	43	36	34	27	21
297	TRUE	Empty	RecName: Full=Phosphoribosylformylglycinamidine synthase subunit PurQ; Short=FGAM synthase; AltName: Full=Formylglycinamide ribonucleotide amidotransferase subunit I; Short=FGAR amidotransferase I; Short=FGAR-AT I; AltName: Full=Glutaminase PurQ; AltName: Full=Phosphoribosylformylglycinamidine synthase subunit I	gi|116255962		25 kDa		0.16	0.7	[]	unknown	29	31	21	23	20	9
298	TRUE	Empty	MULTISPECIES: zinc protease [Bacteria]	gi|446587420		50 kDa		0.21	1.5	[]	unknown	10	15	15	8	11	8
299	TRUE	Empty	RecName: Full=NH(3)-dependent NAD(+) synthetase	gi|122540519		31 kDa		0.12	1.4	[]	unknown	30	35	41	19	14	3
300	TRUE	Empty	RecName: Full=50S ribosomal protein L30	gi|60393663		7 kDa		0.19	0.8	[]	unknown	37	30	29	16	15	5
301	TRUE	Empty	MULTISPECIES: hypothetical protein [Bacteria]	gi|446546557		61 kDa		0.33	0.9	[]	unknown	27	24	23	21	23	3
302	TRUE	Empty	indolepyruvate decarboxylase [Staphylococcus aureus]	gi|446736299		61 kDa		0.2	1.3	[]	unknown	29	31	37	19	15	9
303	TRUE	Empty	hypothetical protein SAOUHSC_02574 [Staphylococcus aureus subsp. aureus NCTC 8325]	gi|88196218		41 kDa		0.3	0.8	[]	unknown	31	28	26	28	23	5
304	TRUE	Empty	MULTISPECIES: peptide deformylase [Bacteria]	gi|446879780		21 kDa		0.021	2.2	[]	unknown	11	16	24	12	9	7
305	TRUE	Empty	MULTISPECIES: peptidase [Bacteria]	gi|446692374		21 kDa		0.076	0.6	[]	unknown	25	17	15	14	12	5
306	TRUE	Empty	MULTISPECIES: hypothetical protein [Bacteria]	gi|446234914		66 kDa		0.5	1	[]	unknown	23	27	24	8	4	0
307	TRUE	Empty	MULTISPECIES: transcription termination/antitermination protein NusG [Bacteria]	gi|447211046		21 kDa		0.39	1.1	[]	unknown	25	28	28	16	13	2
308	TRUE	Empty	MULTISPECIES: transcriptional regulator [Bacteria]	gi|445958221		14 kDa		0.4	0.9	[]	unknown	34	41	31	24	20	12
309	TRUE	Empty	RecName: Full=Hyaluronate lyase; AltName: Full=Hyaluronidase; Short=HYase; Flags: Precursor	gi|3913884		92 kDa		0.5	INF	[]	unknown	0	0	1	0	0	0
310	TRUE	Empty	RecName: Full=30S ribosomal protein S11	gi|123003433		14 kDa		0.18	1.3	[]	unknown	26	37	34	24	21	0
311	TRUE	Empty	MULTISPECIES: S-adenosylmethionine synthase [Bacteria]	gi|446856566		44 kDa		0.44	0.9	[]	unknown	26	28	24	11	10	2
312	TRUE	Empty	acetyl-CoA carboxylase biotin carboxylase [Staphylococcus aureus]	gi|446679266		50 kDa		0.5	0.9	[]	unknown	11	17	10	11	9	0
313	TRUE	Empty	RecName: Full=Queuine tRNA-ribosyltransferase; AltName: Full=Guanine insertion enzyme; AltName: Full=tRNA-guanine transglycosylase	gi|123003456		43 kDa		0.42	0.8	[]	unknown	13	10	11	8	8	5
314	TRUE	Empty	MULTISPECIES: hypothetical protein [Bacteria]	gi|446414259		35 kDa		0.035	0.6	[]	unknown	33	28	19	20	22	5
315	TRUE	Empty	RecName: Full=Probable uridylyltransferase SAOUHSC_02423	gi|121957468		45 kDa		0.55	1	[]	unknown	26	34	26	24	19	7
316	TRUE	Empty	RecName: Full=Peptide chain release factor 1; Short=RF-1	gi|119361614		40 kDa		0.35	0.8	[]	unknown	15	16	12	11	11	1
317	TRUE	Empty	hypothetical protein SAOUHSC_00369 [Staphylococcus aureus subsp. aureus NCTC 8325]	gi|88194167		36 kDa		0.29	0.8	[]	unknown	29	27	24	14	6	3
318	TRUE	Empty	RecName: Full=50S ribosomal protein L14	gi|123098007		13 kDa		0.31	0.9	[]	unknown	34	33	29	23	12	1
319	TRUE	Empty	hypothetical protein SAOUHSC_02554 [Staphylococcus aureus subsp. aureus NCTC 8325]	gi|88196199		34 kDa		0.5	1.2	[]	unknown	6	13	7	2	6	2
320	TRUE	Empty	MULTISPECIES: UDP-glucose 4-epimerase [Bacteria]	gi|446645955		36 kDa		0.28	0.8	[]	unknown	16	16	12	11	8	0
321	TRUE	Empty	hypothetical protein SAOUHSC_01728 [Staphylococcus aureus subsp. aureus NCTC 8325]	gi|88195433		38 kDa		0.25	2	[]	unknown	3	5	6	0	0	0
322	TRUE	Empty	MULTISPECIES: GTP-binding protein [Bacteria]	gi|447141476		41 kDa		0.3	1.2	[]	unknown	25	24	30	19	8	3
323	TRUE	Empty	N5-carboxyaminoimidazole ribonucleotide synthase [Staphylococcus aureus]	gi|446933156		42 kDa		0.0042	0.5	[]	unknown	40	51	19	26	16	2
324	TRUE	Empty	sun protein [Staphylococcus aureus subsp. aureus NCTC 8325]	gi|88194923		50 kDa		0.42	0.8	[]	unknown	13	13	11	10	5	1
325	TRUE	Empty	haloacid dehalogenase [Staphylococcus aureus]	gi|446293069		32 kDa		0.5	1.1	[]	unknown	17	23	18	11	4	0
326	TRUE	Empty	RecName: Full=Aspartyl/glutamyl-tRNA(Asn/Gln) amidotransferase subunit C; Short=Asp/Glu-ADT subunit C	gi|122539111		11 kDa		0.44	1.1	[]	unknown	17	26	19	18	15	8
327	TRUE	Empty	DNA repair protein RecN [Staphylococcus aureus subsp. aureus NCTC 8325]	gi|88195326		64 kDa		0.15	0.6	[]	unknown	15	13	9	9	3	0
328	TRUE	Empty	MULTISPECIES: universal stress protein UspA [Bacteria]	gi|446199747		15 kDa		0.2	0.8	[]	unknown	29	41	22	8	6	3
329	TRUE	Empty	DNA gyrase subunit B [Staphylococcus aureus subsp. aureus NCTC 8325]	gi|88193828		73 kDa		0.42	0.8	[]	unknown	13	14	11	6	5	0
330	TRUE	Empty	MULTISPECIES: 1-pyrroline-5-carboxylate dehydrogenase [Bacteria]	gi|446181837		57 kDa		0.066	0.5	[]	unknown	15	13	7	10	10	2
331	TRUE	Empty	RecName: Full=DEAD-box ATP-dependent RNA helicase CshB	gi|122539414		51 kDa		0.32	0.8	[]	unknown	23	19	19	11	6	0
332	TRUE	Empty	RecName: Full=Elastin-binding protein EbpS	gi|122539527		53 kDa		0.18	1.5	[]	unknown	12	15	18	11	13	1
333	TRUE	Empty	hypothetical protein SAOUHSC_01744 [Staphylococcus aureus subsp. aureus NCTC 8325]	gi|88195447		86 kDa		0.14	0.3	[]	unknown	6	7	2	1	0	0
334	TRUE	Empty	RecName: Full=DNA topoisomerase 4 subunit B; AltName: Full=Topoisomerase IV subunit B	gi|112823997		74 kDa		0.31	0.8	[]	unknown	21	20	17	12	3	0
335	TRUE	Empty	MULTISPECIES: 50S ribosomal protein L33 [Bacteria]	gi|447188453		6 kDa	TRUE	0.44	1.1	[]	unknown	19	20	21	14	10	4
336	TRUE	Empty	MULTISPECIES: protease [Bacteria]	gi|446771048		48 kDa		0.5	0.8	[]	unknown	4	7	3	1	1	0
337	TRUE	Empty	MULTISPECIES: surface anchored protein [Bacteria]	gi|447074644		71 kDa		0.084	2.2	[]	unknown	6	4	13	0	1	0
338	TRUE	Empty	hypothetical protein SAOUHSC_02604 [Staphylococcus aureus subsp. aureus NCTC 8325]	gi|88196246		32 kDa		0.2	0.8	[]	unknown	30	25	23	23	18	5
339	TRUE	Empty	MULTISPECIES: ABC transporter ATP-binding protein [Bacteria]	gi|446524728		74 kDa	TRUE	0.36	0.6	[]	unknown	5	5	3	1	0	0
340	TRUE	Empty	RecName: Full=Putative heme-dependent peroxidase SAOUHSC_00573; AltName: Full=UPF0447 protein SAOUHSC_00573	gi|122540099		29 kDa		0.57	1	[]	unknown	17	14	17	1	4	1
341	TRUE	Empty	fructose 1,6-bisphosphatase [Staphylococcus aureus]	gi|446114313		76 kDa		0.12	0.6	[]	unknown	17	15	10	3	1	0
342	TRUE	Empty	ABC transporter ATP-binding protein [Staphylococcus aureus]	gi|446447256		73 kDa	TRUE	0.61	1	[]	unknown	6	11	6	2	1	0
343	TRUE	Empty	RecName: Full=Serine-aspartate repeat-containing protein D; Flags: Precursor	gi|122540119		146 kDa	TRUE	0.11	5	[]	unknown	1	0	5	0	0	1
344	TRUE	Empty	oxygen-dependent choline dehydrogenase [Staphylococcus aureus]	gi|445988666		64 kDa		0.26	0.7	[]	unknown	13	11	9	0	0	0
345	TRUE	Empty	MULTISPECIES: aminopeptidase [Bacteria]	gi|446355499		38 kDa		0.5	0.9	[]	unknown	17	21	16	8	9	4
346	TRUE	Empty	MULTISPECIES: virulence factor EsxA [Bacteria]	gi|447163570		11 kDa		< 0.00010	3.1	2.5mM Cu high, TSB low	unknown	18	24	56	13	21	8
347	TRUE	Empty	RecName: Full=Mannitol-1-phosphate 5-dehydrogenase	gi|122538917		41 kDa		0.33	0.9	[]	unknown	27	25	23	15	11	3
348	TRUE	Empty	hypothetical protein SAOUHSC_02793 [Staphylococcus aureus subsp. aureus NCTC 8325]	gi|88196428		68 kDa	TRUE	0.5	0.9	[]	unknown	11	15	10	6	5	1
349	TRUE	Empty	RecName: Full=Glycerol kinase; AltName: Full=ATP:glycerol 3-phosphotransferase; AltName: Full=Glycerokinase; Short=GK	gi|122539675		56 kDa		0.43	1.1	[]	unknown	15	21	17	6	8	0
350	TRUE	Empty	RecName: Full=Aminomethyltransferase; AltName: Full=Glycine cleavage system T protein	gi|122539427		40 kDa		0.27	1.3	[]	unknown	18	20	23	24	11	8
351	TRUE	Empty	RecName: Full=Phosphoribosylaminoimidazole-succinocarboxamide synthase; AltName: Full=SAICAR synthetase	gi|122539825		27 kDa		0.02	0.5	[]	unknown	35	34	19	22	10	7
352	TRUE	Empty	RecName: Full=Staphylococcal secretory antigen ssaA2; Flags: Precursor	gi|122540640		29 kDa		0.11	1.4	[]	unknown	28	45	39	29	22	21
353	TRUE	Empty	MULTISPECIES: hypoxanthine-guanine phosphoribosyltransferase [Bacteria]	gi|446473429		20 kDa		0.3	1.2	[]	unknown	25	24	30	13	11	2
354	TRUE	Empty	MULTISPECIES: cytidylate kinase [Bacteria]	gi|446567045		25 kDa		0.5	0.9	[]	unknown	17	20	16	16	8	4
355	TRUE	Empty	RecName: Full=DNA mismatch repair protein MutL	gi|109940102		77 kDa		0.61	1	[]	unknown	6	6	6	5	1	0
356	TRUE	Empty	RecName: Full=Aminoacyltransferase FemA; AltName: Full=Factor essential for expression of methicillin resistance A; AltName: Full=N-acetylmuramoyl-L-alanyl-D-glutamyl-L-lysyl-(N6-glycyl)-D-alanyl-D-alanine-diphosphoundecaprenyl-N-acetylglucosamine:glycine glycyltransferase	gi|110808230		49 kDa		0.56	1	[]	unknown	19	21	19	8	6	1
357	TRUE	Empty	RecName: Full=50S ribosomal protein L29	gi|122538860		8 kDa		0.36	1.2	[]	unknown	13	16	16	11	16	15
358	TRUE	Empty	hypothetical protein SAOUHSC_01460 [Staphylococcus aureus subsp. aureus NCTC 8325]	gi|88195178		43 kDa		0.43	1.1	[]	unknown	14	16	16	15	8	2
359	TRUE	Empty	primosomal protein N [Staphylococcus aureus subsp. aureus NCTC 8325]	gi|88194918		93 kDa		0.25	INF	[]	unknown	0	2	2	0	0	0
360	TRUE	Empty	amidophosphoribosyltransferase [Staphylococcus aureus]	gi|446405858		54 kDa		0.15	0.6	[]	unknown	15	18	9	8	3	0
361	TRUE	Empty	MULTISPECIES: tellurite resistance protein TelA [Bacteria]	gi|446060558		43 kDa		0.44	0.9	[]	unknown	28	31	26	11	8	0
362	TRUE	Empty	RecName: Full=GTPase Der; AltName: Full=GTP-binding protein EngA	gi|122539535		49 kDa		0.56	1	[]	unknown	21	22	21	13	12	1
363	TRUE	Empty	RecName: Full=RNA polymerase sigma factor SigA	gi|60393874		42 kDa	TRUE	0.5	1.1	[]	unknown	15	14	16	14	8	3
364	TRUE	Empty	MULTISPECIES: sensor protein kinase WalK [Bacteria]	gi|446794351		70 kDa	TRUE	1	INF	[]	unknown	0	1	0	0	0	0
365	TRUE	Empty	2-oxoisovalerate dehydrogenase, E1 component subunit beta [Staphylococcus aureus subsp. aureus NCTC 8325]	gi|88195323		36 kDa		0.44	1.1	[]	unknown	21	21	23	16	11	2
366	TRUE	Empty	malate:quinone oxidoreductase [Staphylococcus aureus]	gi|446133504		55 kDa		0.5	1.1	[]	unknown	8	14	9	5	1	0
367	TRUE	Empty	MULTISPECIES: 6,7-dimethyl-8-ribityllumazine synthase [Bacteria]	gi|446931295		16 kDa		0.12	1.4	[]	unknown	23	20	33	18	12	5
368	TRUE	Empty	hypothetical protein SAOUHSC_01679 [Staphylococcus aureus subsp. aureus NCTC 8325]	gi|88195385		51 kDa		0.42	0.9	[]	unknown	14	11	12	8	6	0
369	TRUE	Empty	hypothetical protein SAOUHSC_00712 [Staphylococcus aureus subsp. aureus NCTC 8325]	gi|88194477		32 kDa		0.56	1	[]	unknown	21	20	21	15	17	7
370	TRUE	Empty	hypothetical protein SAOUHSC_01861 [Staphylococcus aureus subsp. aureus NCTC 8325]	gi|88195559		40 kDa		0.5	1	[]	unknown	26	33	27	17	14	4
371	TRUE	Empty	MULTISPECIES: anti-sigma-B factor antagonist [Bacteria]	gi|446975235		12 kDa		0.44	1.1	[]	unknown	20	23	22	14	18	10
372	TRUE	Empty	RecName: Full=Signal transduction protein TRAP; AltName: Full=Target of RNAIII-activating protein	gi|122540609		20 kDa		0.5	1.1	[]	unknown	14	19	15	10	7	3
373	TRUE	Empty	RecName: Full=UPF0176 protein SAOUHSC_03024	gi|122538519		37 kDa		0.25	2	[]	unknown	3	5	6	2	3	0
374	TRUE	Empty	RecName: Full=Phenylalanine--tRNA ligase alpha subunit; AltName: Full=Phenylalanyl-tRNA synthetase alpha subunit; Short=PheRS	gi|123003480		40 kDa		0.5	0.9	[]	unknown	15	7	14	15	5	1
375	TRUE	Empty	RecName: Full=Chaperone protein DnaJ	gi|122539398		42 kDa		0.44	1.1	[]	unknown	22	19	24	7	2	0
376	TRUE	Empty	RecName: Full=Putative aldehyde dehydrogenase AldA	gi|122540368		54 kDa	TRUE	0.36	1.2	[]	unknown	14	22	17	4	0	1
377	TRUE	Empty	MULTISPECIES: NAD-specific glutamate dehydrogenase [Bacteria]	gi|446060632		46 kDa		0.35	1.3	[]	unknown	11	19	14	5	3	0
378	TRUE	Empty	MULTISPECIES: phosphoenolpyruvate carboxykinase [ATP] [Bacteria]	gi|446032051		59 kDa		0.039	0.4	[]	unknown	15	12	6	7	2	0
379	TRUE	Empty	RecName: Full=Probable ATP-dependent helicase DinG homolog	gi|122539544		104 kDa		0.36	0.6	[]	unknown	5	6	3	1	1	0
380	TRUE	Empty	MULTISPECIES: 30S ribosomal protein S10 [Bacteria]	gi|447041411		12 kDa		0.24	0.7	[]	unknown	19	15	14	12	10	9
381	TRUE	Empty	RecName: Full=N-acetylmuramoyl-L-alanine amidase domain-containing protein SAOUHSC_02979; Flags: Precursor	gi|122540508		69 kDa		0.044	2.1	[]	unknown	9	15	19	0	4	1
382	TRUE	Empty	MULTISPECIES: amino acid ABC transporter substrate-binding protein [Bacteria]	gi|446748673		29 kDa		0.56	1	[]	unknown	18	23	18	0	0	0
383	TRUE	Empty	RecName: Full=Methionyl-tRNA formyltransferase	gi|123003478		34 kDa		0.5	1	[]	unknown	25	29	26	14	8	3
384	TRUE	Empty	RecName: Full=DNA polymerase III subunit alpha	gi|14194671		123 kDa		0.25	0	[]	unknown	2	1	0	1	0	0
385	TRUE	Empty	hypothetical protein SAOUHSC_02436 [Staphylococcus aureus subsp. aureus NCTC 8325]	gi|88196090		76 kDa		0.13	0.4	[]	unknown	9	10	4	4	1	0
386	TRUE	Empty	RecName: Full=Peptide chain release factor 3; Short=RF-3	gi|123407067		60 kDa		0.57	1	[]	unknown	14	16	14	11	7	0
387	TRUE	Empty	trans-2-enoyl-ACP reductase [Staphylococcus aureus subsp. aureus RN4220]	gi|6180191		28 kDa	TRUE	< 0.00010	4	2.5mM Cu high, TSB low	unknown	10	22	40	11	5	0
388	TRUE	Empty	RecName: Full=tRNA-specific 2-thiouridylase MnmA	gi|205829109		42 kDa	TRUE	0.23	1.4	[]	unknown	12	16	17	6	1	0
389	TRUE	Empty	hypothetical protein SAOUHSC_00513 [Staphylococcus aureus subsp. aureus NCTC 8325]	gi|88194294		27 kDa		0.24	1.6	[]	unknown	7	6	11	5	6	1
390	TRUE	Empty	hypothetical protein SAOUHSC_01098 [Staphylococcus aureus subsp. aureus NCTC 8325]	gi|88194844		65 kDa		0.6	1	[]	unknown	7	11	7	4	0	0
391	TRUE	Empty	aldehyde dehydrogenase [Staphylococcus aureus subsp. aureus NCTC 8325]	gi|88195822		52 kDa		0.33	0.8	[]	unknown	25	26	21	8	7	4
392	TRUE	Empty	MULTISPECIES: aminoacyltransferase FemB [Bacteria]	gi|446595752		50 kDa		0.37	0.9	[]	unknown	20	14	17	4	5	0
393	TRUE	Empty	MULTISPECIES: hypothetical protein [Bacteria]	gi|446094064		19 kDa		0.19	1.5	[]	unknown	13	26	19	0	0	0
394	TRUE	Empty	cytosol aminopeptidase [Staphylococcus aureus subsp. aureus NCTC 8325]	gi|88194636		54 kDa		0.35	1.2	[]	unknown	26	30	30	14	9	2
395	TRUE	Empty	MULTISPECIES: serine protease [Bacteria]	gi|446264270		55 kDa		0.75	1	[]	unknown	1	2	1	0	0	1
396	TRUE	Empty	lipoyltransferase and lipoate-protein ligase [Staphylococcus aureus subsp. aureus NCTC 8325]	gi|88194720		38 kDa		0.16	1.4	[]	unknown	21	30	29	7	4	2
397	TRUE	Empty	RecName: Full=Lipoyl synthase; AltName: Full=Lip-syn; Short=LS; AltName: Full=Lipoate synthase; AltName: Full=Lipoic acid synthase; AltName: Full=Sulfur insertion protein LipA	gi|123407077		35 kDa		0.17	0.5	[]	unknown	11	8	6	10	8	1
398	TRUE	Empty	2-oxoisovalerate dehydrogenase, E1 component subunit alpha [Staphylococcus aureus subsp. aureus NCTC 8325]	gi|88195324		36 kDa		0.36	0.8	[]	unknown	18	19	15	14	6	2
399	TRUE	Empty	hypothetical protein SAOUHSC_00309 [Staphylococcus aureus subsp. aureus NCTC 8325]	gi|88194110		38 kDa		0.24	1.3	[]	unknown	22	27	28	15	8	1
400	TRUE	Empty	MULTISPECIES: tryptophan--tRNA ligase [Bacteria]	gi|446371079		37 kDa		0.5	0.9	[]	unknown	19	19	18	14	10	2
401	TRUE	Empty	hypothetical protein SAOUHSC_01499 [Staphylococcus aureus subsp. aureus NCTC 8325]	gi|88195215		37 kDa		0.56	1	[]	unknown	20	24	20	4	4	0
402	TRUE	Empty	MULTISPECIES: DNA-directed RNA polymerase subunit omega [Bacteria]	gi|446856700		8 kDa		0.31	0.8	[]	unknown	21	19	17	17	11	2
403	TRUE	Empty	hypothetical protein SAOUHSC_02150 [Staphylococcus aureus subsp. aureus NCTC 8325]	gi|88195830		22 kDa		0.38	1.1	[]	unknown	20	24	23	11	14	9
404	TRUE	Empty	hypothetical protein SAOUHSC_02387 [Staphylococcus aureus subsp. aureus NCTC 8325]	gi|88196050		24 kDa		0.16	0.7	[]	unknown	29	28	21	5	3	4
405	TRUE	Empty	serine-protein kinase RsbW [Staphylococcus aureus subsp. aureus NCTC 8325]	gi|88195965		19 kDa	TRUE	0.32	1.2	[]	unknown	19	22	23	17	15	3
406	TRUE	Empty	MULTISPECIES: 50S ribosomal protein L20 [Bacteria]	gi|447061104		14 kDa		0.5	0.8	[]	unknown	6	7	5	8	8	3
407	TRUE	Empty	MULTISPECIES: hypothetical protein [Bacteria]	gi|447144849		30 kDa		0.12	1.8	[]	unknown	9	15	16	3	4	0
408	TRUE	Empty	MULTISPECIES: LacI family transcriptional regulator [Bacteria]	gi|447192387		30 kDa		0.24	0.8	[]	unknown	28	27	22	13	9	1
409	TRUE	Empty	ABC transporter ATP-binding protein [Staphylococcus aureus]	gi|446139023		28 kDa		1	INF	[]	unknown	0	2	0	0	0	0
410	TRUE	Empty	RecName: Full=Cell cycle protein GpsB; AltName: Full=Guiding PBP1-shuttling protein	gi|122539551		13 kDa		0.016	0.5	[]	unknown	29	14	14	13	14	7
411	TRUE	Empty	RecName: Full=UDP-N-acetylmuramoylalanine--D-glutamate ligase; AltName: Full=D-glutamic acid-adding enzyme; AltName: Full=UDP-N-acetylmuramoyl-L-alanyl-D-glutamate synthetase	gi|122063261		50 kDa		0.028	0.5	[]	unknown	23	17	11	14	8	0
412	TRUE	Empty	RecName: Full=Diapolycopene oxygenase; AltName: Full=4,4'-diaponeurosporene oxidase	gi|122538621		57 kDa		0.054	0.2	[]	unknown	8	5	2	4	1	0
413	TRUE	Empty	phosphoribosylaminoimidazole carboxylase [Staphylococcus aureus]	gi|446784316		17 kDa	TRUE	0.25	0.8	[]	unknown	21	26	16	23	25	14
414	TRUE	Empty	protoporphyrinogen oxidase [Staphylococcus aureus subsp. aureus NCTC 8325]	gi|88195653		52 kDa		0.21	0.6	[]	unknown	9	7	5	0	0	0
415	TRUE	Empty	RecName: Full=Protein FmtA; Flags: Precursor	gi|114149300		46 kDa		0.25	0	[]	unknown	2	0	0	0	0	0
416	TRUE	Empty	MULTISPECIES: mannitol-specific phosphotransferase enzyme IIA component [Bacteria]	gi|447214893		16 kDa		0.23	1.2	[]	unknown	28	44	35	18	19	2
417	TRUE	Empty	hypothetical protein SAOUHSC_00406 [Staphylococcus aureus subsp. aureus NCTC 8325]	gi|88194200		49 kDa		0.5	0.9	[]	unknown	16	12	15	2	4	0
418	TRUE	Empty	peptide ABC transporter substrate-binding protein [Staphylococcus aureus subsp. aureus NCTC 8325]	gi|88196403		60 kDa		0.25	INF	[]	unknown	0	3	2	0	0	0
419	TRUE	Empty	anaerobic ribonucleoside triphosphate reductase [Staphylococcus aureus subsp. aureus NCTC 8325]	gi|88196568		70 kDa		< 0.00010	0.04	2.5mM Cu low, TSB high	unknown	24	18	1	0	0	0
420	TRUE	Empty	RecName: Full=UTP--glucose-1-phosphate uridylyltransferase; AltName: Full=Alpha-D-glucosyl-1-phosphate uridylyltransferase; AltName: Full=UDP-glucose pyrophosphorylase; Short=UDPGP; AltName: Full=Uridine diphosphoglucose pyrophosphorylase	gi|160013896		32 kDa		0.43	1.2	[]	unknown	13	15	15	7	3	0
421	TRUE	Empty	sulfite reductase subunit alpha [Staphylococcus aureus]	gi|446697809		72 kDa		0.64	1	[]	unknown	4	8	4	3	2	2
422	TRUE	Empty	MULTISPECIES: diaminopimelate decarboxylase [Bacteria]	gi|446139091		47 kDa		0.35	1.1	[]	unknown	29	30	33	10	4	2
423	TRUE	Empty	MULTISPECIES: UDP-N-acetylmuramoylalanyl-D-glutamyl-2, 6-diaminopimelate--D-alanyl-D-alanine ligase [Bacteria]	gi|446534119		50 kDa		0.11	0.6	[]	unknown	16	17	9	13	6	0
424	TRUE	Empty	RecName: Full=3-phosphoshikimate 1-carboxyvinyltransferase; AltName: Full=5-enolpyruvylshikimate-3-phosphate synthase; Short=EPSP synthase; Short=EPSPS	gi|110282937		47 kDa		0.37	1.2	[]	unknown	16	20	19	11	8	0
425	TRUE	Empty	RecName: Full=Probable transcriptional regulatory protein SAOUHSC_00675	gi|119369539		26 kDa		0.5	1.1	[]	unknown	12	13	13	9	10	5
426	TRUE	Empty	MULTISPECIES: 30S ribosomal protein S18 [Bacteria]	gi|446819788		9 kDa		0.6	1	[]	unknown	7	8	7	4	8	0
427	TRUE	Empty	hypothetical protein [Staphylococcus aureus]	gi|446606353-DECOY		?		1	INF	[]	unknown	0	0	0	1	0	0
428	TRUE	Empty	MULTISPECIES: ATP synthase subunit gamma [Bacteria]	gi|446079748		32 kDa	TRUE	0.075	0.5	[]	unknown	16	13	8	11	13	2
429	TRUE	Empty	hypothetical protein SAOUHSC_00044 [Staphylococcus aureus subsp. aureus NCTC 8325]	gi|88193865		33 kDa		0.5	0.8	[]	unknown	4	5	3	0	0	0
430	TRUE	Empty	MULTISPECIES: phosphate acyltransferase [Bacteria]	gi|446161889		35 kDa		0.36	1.2	[]	unknown	14	17	17	4	4	0
431	TRUE	Empty	MULTISPECIES: thioredoxin [Bacteria]	gi|446733907		12 kDa		0.45	1.1	[]	unknown	31	33	33	24	21	10
432	TRUE	Empty	lipase [Staphylococcus aureus]	gi|446900917		77 kDa	TRUE	0.5	0	[]	unknown	1	0	0	0	0	0
433	TRUE	Empty	RecName: Full=Probable tRNA sulfurtransferase; AltName: Full=Sulfur carrier protein ThiS sulfurtransferase; AltName: Full=Thiamine biosynthesis protein ThiI; AltName: Full=tRNA 4-thiouridine synthase	gi|122539305		46 kDa		0.6	1	[]	unknown	8	11	8	0	0	0
434	TRUE	Empty	UDP-N-acetylmuramyl tripeptide synthetase [Staphylococcus aureus subsp. aureus NCTC 8325]	gi|88195789		49 kDa	TRUE	0.26	0.7	[]	unknown	13	11	9	4	2	0
435	TRUE	Empty	RecName: Full=Dihydrolipoyllysine-residue succinyltransferase component of 2-oxoglutarate dehydrogenase complex; AltName: Full=2-oxoglutarate dehydrogenase complex component E2; Short=OGDC-E2; AltName: Full=Dihydrolipoamide succinyltransferase component of 2-oxoglutarate dehydrogenase complex	gi|122539580		47 kDa		0.29	0.8	[]	unknown	17	15	13	6	4	2
436	TRUE	Empty	ribonuclease Y [Staphylococcus aureus]	gi|446973657		59 kDa		0.5	1.3	[]	unknown	3	7	4	3	1	0
437	TRUE	Empty	MULTISPECIES: histidine--tRNA ligase [Bacteria]	gi|446513480		48 kDa		0.43	1.2	[]	unknown	13	14	15	7	5	1
438	TRUE	Empty	hypothetical protein SAOUHSC_02755 [Staphylococcus aureus subsp. aureus NCTC 8325]	gi|88196391		39 kDa		0.5	1.1	[]	unknown	14	14	15	5	6	4
439	TRUE	Empty	hypothetical protein SAOUHSC_01604 [Staphylococcus aureus subsp. aureus NCTC 8325]	gi|88195315		14 kDa		0.067	1.8	[]	unknown	13	21	23	4	3	1
440	TRUE	Empty	MULTISPECIES: hypothetical protein [Bacteria]	gi|446082580		49 kDa		0.69	1	[]	unknown	2	3	2	0	0	0
441	TRUE	Empty	RecName: Full=HTH-type transcriptional regulator SAOUHSC_02897	gi|123406977		22 kDa		0.75	1	[]	unknown	1	0	1	0	0	0
442	TRUE	Empty	hypothetical protein SAOUHSC_01412 [Staphylococcus aureus subsp. aureus NCTC 8325]	gi|88195138		73 kDa		0.5	2	[]	unknown	1	1	2	1	1	0
443	TRUE	Empty	MULTISPECIES: molybdopterin molybdenumtransferase [Bacteria]	gi|446181863		45 kDa		0.44	0.9	[]	unknown	26	18	24	10	5	0
444	TRUE	Empty	3'-5' exoribonuclease YhaM [Staphylococcus aureus subsp. aureus NCTC 8325]	gi|88195664		36 kDa		0.34	0.8	[]	unknown	14	10	11	6	3	3
445	TRUE	Empty	RecName: Full=Urease subunit alpha; AltName: Full=Urea amidohydrolase subunit alpha	gi|122540650		62 kDa		0.066	0.5	[]	unknown	15	10	7	0	0	0
446	TRUE	Empty	MULTISPECIES: hypothetical protein [Bacteria]	gi|446763555		17 kDa		0.34	0.5	[]	unknown	4	3	2	0	1	0
447	TRUE	Empty	sucrose-6-phosphate hydrolase [Staphylococcus aureus subsp. aureus NCTC 8325]	gi|88195938		58 kDa		0.5	1.1	[]	unknown	19	19	20	8	9	4
448	TRUE	Empty	MULTISPECIES: diacetyl reductase [(S)-acetoin forming] [Bacteria]	gi|446105916		27 kDa		0.088	0.7	[]	unknown	33	33	22	11	12	7
449	TRUE	Empty	MULTISPECIES: peptidase T [Bacteria]	gi|446718513		46 kDa		0.5	1.1	[]	unknown	7	9	8	4	4	2
450	TRUE	Empty	MULTISPECIES: arsenate reductase [Bacteria]	gi|446512094		14 kDa		0.44	0.9	[]	unknown	27	23	25	13	10	10
451	TRUE	Empty	hypothetical protein SAOUHSC_02747 [Staphylococcus aureus subsp. aureus NCTC 8325]	gi|88196385		24 kDa		0.42	1.2	[]	unknown	12	17	14	5	7	1
452	TRUE	Empty	RecName: Full=UDP-N-acetylenolpyruvoylglucosamine reductase; AltName: Full=UDP-N-acetylmuramate dehydrogenase	gi|122540001		34 kDa		0.23	0.6	[]	unknown	10	11	6	6	7	0
453	TRUE	Empty	hypothetical protein SAOUHSC_02899 [Staphylococcus aureus subsp. aureus NCTC 8325]	gi|88196527		38 kDa		0.5	0.9	[]	unknown	11	18	10	9	8	5
454	TRUE	Empty	MULTISPECIES: primosomal protein DnaI [Bacteria]	gi|446731365		36 kDa		0.59	1	[]	unknown	9	8	9	1	0	0
455	TRUE	Empty	MULTISPECIES: hypothetical protein [Bacteria]	gi|446540389		22 kDa		0.5	1	[]	unknown	23	23	22	14	1	1
456	TRUE	Empty	nitrate reductase [Staphylococcus aureus]	gi|446615299		59 kDa	TRUE	0.031	0	[]	unknown	5	7	0	0	0	0
457	TRUE	Empty	2-oxoisovalerate dehydrogenase, E2 component, dihydrolipoamide acetyltransferase [Staphylococcus aureus subsp. aureus NCTC 8325]	gi|88195322		47 kDa		0.39	0.7	[]	unknown	7	6	5	3	4	2
458	TRUE	Empty	hypothetical protein SAOUHSC_02525 [Staphylococcus aureus subsp. aureus NCTC 8325]	gi|88196173		115 kDa		0.64	1	[]	unknown	4	4	4	0	0	0
459	TRUE	Empty	teichoic acid biosynthesis protein F [Staphylococcus aureus subsp. aureus NCTC 8325]	gi|88194031		46 kDa		0.66	1	[]	unknown	3	3	3	0	1	0
460	TRUE	Empty	UDP-N-acetylglucosamine 2-epimerase [Staphylococcus aureus subsp. aureus NCTC 8325]	gi|88193933		43 kDa		0.19	0.7	[]	unknown	20	17	14	2	1	0
461	TRUE	Empty	MULTISPECIES: FMN-dependent NADH-azoreductase [Bacteria]	gi|447074195		23 kDa		0.24	1.4	[]	unknown	13	19	18	6	11	3
462	TRUE	Empty	RecName: Full=50S ribosomal protein L31 type B	gi|148878583		10 kDa		0.41	0.8	[]	unknown	10	9	8	9	10	6
463	TRUE	Empty	RecName: Full=Acetyl-coenzyme A carboxylase carboxyl transferase subunit alpha; Short=ACCase subunit alpha; Short=Acetyl-CoA carboxylase carboxyltransferase subunit alpha	gi|122539315		35 kDa		0.32	0.7	[]	unknown	11	11	8	9	5	0
464	TRUE	Empty	RecName: Full=Putative phosphoesterase SAOUHSC_00951	gi|122539864		19 kDa		0.081	0.6	[]	unknown	21	16	12	15	15	12
465	TRUE	Empty	ATP-binding cassette transporter A [Staphylococcus aureus subsp. aureus NCTC 8325]	gi|1262136		64 kDa	TRUE	0.011	0.2	[]	unknown	11	8	2	4	0	0
466	TRUE	Empty	RecName: Full=Argininosuccinate lyase; Short=ASAL; AltName: Full=Arginosuccinase	gi|122539897		52 kDa		0.5	INF	[]	unknown	0	0	1	0	0	0
467	TRUE	Empty	MULTISPECIES: exodeoxyribonuclease 7 large subunit [Bacteria]	gi|447209672		51 kDa		0.39	0.8	[]	unknown	8	8	6	2	1	0
468	TRUE	Empty	hypothetical protein SAOUHSC_00548 [Staphylococcus aureus subsp. aureus NCTC 8325]	gi|88194327		58 kDa	TRUE	0.3	1.5	[]	unknown	6	8	9	4	5	1
469	TRUE	Empty	hypothetical protein SAOUHSC_02383 [Staphylococcus aureus subsp. aureus NCTC 8325]	gi|88196046		53 kDa		0.21	1.4	[]	unknown	16	16	22	4	0	0
470	TRUE	Empty	dihydroorotate dehydrogenase 2 [Staphylococcus aureus subsp. aureus NCTC 8325]	gi|88196537		40 kDa		0.026	0.4	[]	unknown	19	14	8	4	2	0
471	TRUE	Empty	haloacid dehalogenase [Staphylococcus aureus]	gi|446516021		32 kDa		0.43	0.9	[]	unknown	16	9	14	9	6	4
472	TRUE	Empty	DNA polymerase III subunit gamma/tau [Staphylococcus aureus]	gi|447031791		63 kDa		0.0064	0.2	[]	unknown	12	8	2	4	1	0
473	TRUE	Empty	MULTISPECIES: non-heme ferritin [Bacteria]	gi|446872211		20 kDa		0.017	0.5	[]	unknown	26	18	12	11	8	7
474	TRUE	Empty	hypothetical protein SAOUHSC_01890 [Staphylococcus aureus subsp. aureus NCTC 8325]	gi|88195586		58 kDa		0.5	1.2	[]	unknown	4	9	5	0	3	0
475	TRUE	Empty	hypothetical protein SAOUHSC_01307 [Staphylococcus aureus subsp. aureus NCTC 8325]	gi|88195038		39 kDa		0.5	1.2	[]	unknown	4	7	5	1	0	0
476	TRUE	Empty	hypothetical protein SAOUHSC_02665 [Staphylococcus aureus subsp. aureus NCTC 8325]	gi|88196305		16 kDa		0.45	1.1	[]	unknown	27	18	29	12	13	4
477	TRUE	Empty	RecName: Full=S-adenosylmethionine:tRNA ribosyltransferase-isomerase; AltName: Full=Queuosine biosynthesis protein QueA	gi|122539357		39 kDa		0.19	0.2	[]	unknown	4	3	1	3	0	0
478	TRUE	Empty	zinc-type alcohol dehydrogenase-like protein SACOL2177 [Staphylococcus aureus]	gi|446704599		37 kDa		0.15	1.7	[]	unknown	9	12	15	6	2	0
479	TRUE	Empty	ABC transporter permease [Staphylococcus aureus]	gi|446572561		53 kDa		1	INF	[]	unknown	0	0	0	0	0	0
480	TRUE	Empty	trans-sulfuration enzyme family protein [Staphylococcus aureus subsp. aureus NCTC 8325]	gi|88194215		41 kDa		0.12	1.5	[]	unknown	19	20	28	0	0	0
481	TRUE	Empty	MULTISPECIES: foldase [Bacteria]	gi|446704775		36 kDa		0.34	0.8	[]	unknown	13	12	10	2	3	0
482	TRUE	Empty	RecName: Full=Alanine racemase 1	gi|6647411		43 kDa		0.58	1	[]	unknown	13	10	13	9	8	1
483	TRUE	Empty	hypothetical protein SAOUHSC_00227 [Staphylococcus aureus subsp. aureus NCTC 8325]	gi|88194034		66 kDa	TRUE	0.28	0.8	[]	unknown	16	10	12	1	3	0
484	TRUE	Empty	MULTISPECIES: quinol oxidase subunit 2 [Bacteria]	gi|445954981		42 kDa	TRUE	0.13	0.6	[]	unknown	18	11	11	12	6	0
485	TRUE	Empty	hypothetical protein SAOUHSC_01475 [Staphylococcus aureus subsp. aureus NCTC 8325]	gi|88195192		43 kDa		0.6	1	[]	unknown	7	9	7	0	1	0
486	TRUE	Empty	aspartate semialdehyde dehydrogenase [Staphylococcus aureus subsp. aureus NCTC 8325]	gi|88195121		36 kDa		0.27	0.8	[]	unknown	24	25	19	6	4	0
487	TRUE	Empty	RecName: Full=UPF0312 protein SAOUHSC_03022	gi|122538520		19 kDa		0.17	1.4	[]	unknown	22	18	30	3	3	0
488	TRUE	Empty	RecName: Full=Uncharacterized oxidoreductase SAOUHSC_02778	gi|122538683		25 kDa		0.089	1.5	[]	unknown	22	32	33	5	8	4
489	TRUE	Empty	RecName: Full=Octanoyl-[GcvH]:protein N-octanoyltransferase; AltName: Full=Octanoyl-[GcvH]:E2 amidotransferase	gi|338810399		32 kDa	TRUE	0.25	0	[]	unknown	2	0	0	0	0	0
490	TRUE	Empty	RecName: Full=tRNA-2-methylthio-N(6)-dimethylallyladenosine synthase; AltName: Full=(Dimethylallyl)adenosine tRNA methylthiotransferase MiaB; AltName: Full=tRNA-i(6)A37 methylthiotransferase	gi|123407056		59 kDa		0.15	0.6	[]	unknown	15	12	9	10	4	0
491	TRUE	Empty	MULTISPECIES: UvrABC system protein C [Bacteria]	gi|446312674		69 kDa	TRUE	0.5	0	[]	unknown	1	1	0	0	0	0
492	TRUE	Empty	GroES [Staphylococcus aureus subsp. aureus RN4220]	gi|18028156		10 kDa		0.13	1.5	[]	unknown	20	22	29	16	8	2
493	TRUE	Empty	5'-nucleotidase [Staphylococcus aureus subsp. aureus NCTC 8325]	gi|88194087		33 kDa		0.18	0.7	[]	unknown	18	17	12	0	1	1
494	TRUE	Empty	MULTISPECIES: glutathione peroxidase homolog BsaA [Bacteria]	gi|446370223		18 kDa		0.37	0.8	[]	unknown	19	23	16	6	5	0
495	TRUE	Empty	hypothetical protein SAOUHSC_01908 [Staphylococcus aureus subsp. aureus NCTC 8325]	gi|88195603		35 kDa		0.41	0.8	[]	unknown	11	15	9	3	0	0
496	TRUE	Empty	RecName: Full=Copper-exporting P-type ATPase A; AltName: Full=Cu(+)-exporting ATPase	gi|122538628		87 kDa		< 0.00010	INF	2.5mM Cu high, TSB low	unknown	0	15	18	0	3	0
497	TRUE	Empty	MULTISPECIES: fumarate hydratase class II [Bacteria]	gi|446038369		51 kDa		0.17	0.6	[]	unknown	17	17	11	12	10	3
498	TRUE	Empty	hypothetical protein SAOUHSC_02774 [Staphylococcus aureus subsp. aureus NCTC 8325]	gi|88196410		16 kDa		0.099	0.6	[]	unknown	19	12	11	15	12	3
499	TRUE	Empty	RecName: Full=Glycerol-3-phosphate dehydrogenase [NAD(P)+]; AltName: Full=NAD(P)H-dependent glycerol-3-phosphate dehydrogenase	gi|118595526		36 kDa		0.5	0.9	[]	unknown	8	8	7	7	0	0
500	TRUE	Empty	helicase DnaB [Staphylococcus aureus]	gi|446455630		55 kDa		0.34	0.5	[]	unknown	4	2	2	1	0	0
501	TRUE	Empty	chromosome partitioning protein ParA [Staphylococcus aureus]	gi|446881275		38 kDa	TRUE	0.42	1.2	[]	unknown	11	17	13	6	7	0
502	TRUE	Empty	methionine aminopeptidase [Staphylococcus aureus]	gi|446558796		28 kDa		0.14	1.5	[]	unknown	16	18	24	9	12	2
503	TRUE	Empty	MULTISPECIES: glucokinase [Bacteria]	gi|446083459		35 kDa		0.25	0.8	[]	unknown	21	18	16	10	17	0
504	TRUE	Empty	MULTISPECIES: Fur family transcriptional regulator [Bacteria]	gi|446314836		17 kDa		0.34	0.8	[]	unknown	14	19	11	4	0	0
505	TRUE	Empty	MULTISPECIES: hypothetical protein [Staphylococcus]	gi|446079490		8 kDa		0.5	0	[]	unknown	1	0	0	0	0	0
506	TRUE	Empty	hypothetical protein SAOUHSC_02690 [Staphylococcus aureus subsp. aureus NCTC 8325]	gi|88196330		59 kDa		0.5	INF	[]	unknown	0	0	1	2	3	2
507	TRUE	Empty	dihydropteroate synthase [Staphylococcus aureus subsp. aureus NCTC 8325]	gi|88194274		30 kDa		0.15	1.7	[]	unknown	9	9	15	3	3	0
508	TRUE	Empty	RecName: Full=UDP-N-acetylmuramate--L-alanine ligase; AltName: Full=UDP-N-acetylmuramoyl-L-alanine synthetase	gi|122539287		49 kDa		0.29	1.3	[]	unknown	12	12	16	11	4	2
509	TRUE	Empty	transcription termination factor Rho [Staphylococcus aureus subsp. aureus NCTC 8325]	gi|88196025		50 kDa		0.15	1.7	[]	unknown	9	9	15	4	4	0
510	TRUE	Empty	hypothetical protein SAOUHSC_00909 [Staphylococcus aureus subsp. aureus NCTC 8325]	gi|88194666		32 kDa		0.41	0.8	[]	unknown	12	10	10	2	0	0
511	TRUE	Empty	hypothetical protein SAOUHSC_01979 [Staphylococcus aureus subsp. aureus NCTC 8325]	gi|88195670		18 kDa		0.5	0.9	[]	unknown	14	13	13	17	10	8
512	TRUE	Empty	RecName: Full=Lipase 2; AltName: Full=Glycerol ester hydrolase 2; Flags: Precursor	gi|122540261		76 kDa	TRUE	0.11	0.4	[]	unknown	8	3	3	0	0	0
513	TRUE	Empty	RecName: Full=Serine-rich adhesin for platelets; AltName: Full=Staphylococcus aureus surface protein A; Flags: Precursor	gi|123003413		228 kDa	TRUE	0.17	2.3	[]	unknown	3	5	7	1	2	0
514	TRUE	Empty	RecName: Full=GMP reductase; AltName: Full=Guanosine 5'-monophosphate oxidoreductase; Short=Guanosine monophosphate reductase	gi|122539632		36 kDa		0.048	0.4	[]	unknown	13	14	5	12	10	3
515	TRUE	Empty	carbamoyl-phosphate synthase small chain [Staphylococcus aureus]	gi|447113657		40 kDa		0.091	0.7	[]	unknown	34	32	23	9	4	3
516	TRUE	Empty	type I restriction-modification system subunit S [Staphylococcus aureus subsp. aureus NCTC 8325]	gi|88195627		46 kDa	TRUE	0.5	0.8	[]	unknown	5	5	4	1	0	0
517	TRUE	Empty	MULTISPECIES: thiol peroxidase [Bacteria]	gi|446862265		17 kDa		0.35	1.2	[]	unknown	12	11	15	3	5	4
518	TRUE	Empty	isocitrate dehydrogenase [Staphylococcus aureus]	gi|446045310		46 kDa		0.5	1	[]	unknown	22	17	21	11	10	2
519	TRUE	Empty	capsular polysaccharide biosynthesis protein Cap5E [Staphylococcus aureus subsp. aureus NCTC 8325]	gi|88193931		39 kDa		0.66	1	[]	unknown	3	5	3	0	1	0
520	TRUE	Empty	RecName: Full=Transcriptional regulatory protein WalR	gi|123407141		27 kDa		0.0072	0.3	[]	unknown	19	15	6	7	2	1
521	TRUE	Empty	phage infection protein [Staphylococcus aureus subsp. aureus NCTC 8325]	gi|88196598		109 kDa		0.66	1	[]	unknown	3	1	3	0	0	0
522	TRUE	Empty	RecName: Full=Bifunctional protein GlmU; Includes: RecName: Full=UDP-N-acetylglucosamine pyrophosphorylase; AltName: Full=N-acetylglucosamine-1-phosphate uridyltransferase; Includes: RecName: Full=Glucosamine-1-phosphate N-acetyltransferase	gi|119370598		49 kDa		0.59	1	[]	unknown	9	8	9	0	4	0
523	TRUE	Empty	RecName: Full=Endonuclease MutS2	gi|122539777		89 kDa		0.14	3	[]	unknown	2	8	6	2	0	0
524	TRUE	Empty	DNA repair protein RadA [Staphylococcus aureus subsp. aureus NCTC 8325]	gi|161353534		50 kDa		0.64	1	[]	unknown	4	6	4	0	0	0
525	TRUE	Empty	quinone oxidoreductase [Staphylococcus aureus]	gi|446495390		37 kDa	TRUE	0.5	0.9	[]	unknown	14	18	13	7	6	1
526	TRUE	Empty	hypothetical protein SAOUHSC_00607 [Staphylococcus aureus subsp. aureus NCTC 8325]	gi|88194377		20 kDa		0.5	0.9	[]	unknown	8	8	7	2	1	0
527	TRUE	Empty	hypothetical protein SAOUHSC_00319 [Staphylococcus aureus subsp. aureus NCTC 8325]	gi|88194120		39 kDa		0.13	1.9	[]	unknown	7	9	13	2	2	0
528	TRUE	Empty	RecName: Full=Dehydrosqualene desaturase; AltName: Full=4,4'-diapophytoene desaturase; AltName: Full=Diapophytoene desaturase	gi|122538624		57 kDa		0.33	0.8	[]	unknown	12	8	9	2	1	0
529	TRUE	Empty	hypothetical protein SAOUHSC_02915 [Staphylococcus aureus subsp. aureus NCTC 8325]	gi|88196543		64 kDa		0.69	1	[]	unknown	2	1	2	0	0	0
530	TRUE	Empty	hypothetical protein SAOUHSC_01782 [Staphylococcus aureus subsp. aureus NCTC 8325]	gi|88195483		23 kDa		0.35	1.2	[]	unknown	12	11	15	3	1	2
531	TRUE	Empty	N-acetylglucosamine-6-phosphate deacetylase [Staphylococcus aureus subsp. aureus NCTC 8325]	gi|88194475		43 kDa		0.25	0.8	[]	unknown	21	14	16	4	2	0
532	TRUE	Empty	MULTISPECIES: urocanate hydratase [Bacteria]	gi|447149567		61 kDa		0.5	0	[]	unknown	1	0	0	0	0	0
533	TRUE	Empty	capsular polysaccharide biosynthesis protein Cap5D [Staphylococcus aureus subsp. aureus NCTC 8325]	gi|88193930		69 kDa		1	INF	[]	unknown	0	1	0	0	0	0
534	TRUE	Empty	RecName: Full=Uncharacterized protein SAOUHSC_01413	gi|122540644		29 kDa		0.43	1.1	[]	unknown	14	15	16	7	5	0
535	TRUE	Empty	RecName: Full=UPF0337 protein SAOUHSC_00845	gi|122539936		7 kDa	TRUE	0.4	1.3	[]	unknown	7	8	9	4	5	1
536	TRUE	Empty	isochorismate synthase [Staphylococcus aureus]	gi|446112768		52 kDa	TRUE	0.19	4	[]	unknown	1	2	4	0	0	0
537	TRUE	Empty	MULTISPECIES: hypothetical protein [Staphylococcus]	gi|446180033		9 kDa		0.42	0.8	[]	unknown	13	13	11	1	0	0
538	TRUE	Empty	MULTISPECIES: ABC transporter substrate-binding protein [Bacteria]	gi|447137405		37 kDa		0.11	2.7	[]	unknown	3	6	8	0	6	2
539	TRUE	Empty	RecName: Full=Probable endonuclease 4; AltName: Full=Endodeoxyribonuclease IV; AltName: Full=Endonuclease IV	gi|122539415		33 kDa		0.39	0.8	[]	unknown	8	7	6	6	5	1
540	TRUE	Empty	RecName: Full=Xanthine phosphoribosyltransferase; Short=XPRTase	gi|122540209		21 kDa		0.5	1	[]	unknown	20	19	21	12	8	3
541	TRUE	Empty	RecName: Full=Serine-aspartate repeat-containing protein C; Flags: Precursor	gi|122540120		108 kDa	TRUE	0.62	1	[]	unknown	5	0	5	0	0	0
542	TRUE	Empty	6-phospho-beta-glucosidase [Staphylococcus aureus]	gi|446086133		55 kDa		1	INF	[]	unknown	0	2	0	0	0	0
543	TRUE	Empty	RecName: Full=Clumping factor B; AltName: Full=Fibrinogen receptor B; AltName: Full=Fibrinogen-binding protein B; Flags: Precursor	gi|114149251		94 kDa		0.75	1	[]	unknown	1	0	1	0	0	0
544	TRUE	Empty	RecName: Full=Bifunctional protein PyrR; Includes: RecName: Full=Pyrimidine operon regulatory protein; Includes: RecName: Full=Uracil phosphoribosyltransferase; Short=UPRTase	gi|122539729		20 kDa		0.27	0.7	[]	unknown	14	16	10	7	5	2
545	TRUE	Empty	hypothetical protein SAOUHSC_02827 [Staphylococcus aureus subsp. aureus NCTC 8325]	gi|88196461		11 kDa		0.41	0.8	[]	unknown	12	15	10	9	11	4
546	TRUE	Empty	MHC class II analog protein [Staphylococcus aureus subsp. aureus NCTC 8325]	gi|88195840		66 kDa		0.032	0.5	[]	unknown	24	19	12	2	1	1
547	TRUE	Empty	MULTISPECIES: DNA-directed RNA polymerase subunit delta [Bacteria]	gi|446624137		21 kDa		0.57	1	[]	unknown	16	14	16	14	15	6
548	TRUE	Empty	MULTISPECIES: deoxycytidine kinase [Bacteria]	gi|446990006		26 kDa		0.2	1.6	[]	unknown	9	10	14	8	2	1
549	TRUE	Empty	ribosomal large subunit pseudouridine synthase D [Staphylococcus aureus subsp. aureus NCTC 8325]	gi|88195673		31 kDa		0.17	0.4	[]	unknown	7	7	3	4	1	0
550	TRUE	Empty	MULTISPECIES: NADH dehydrogenase [Bacteria]	gi|446716706		39 kDa		0.41	1.2	[]	unknown	9	11	11	4	0	0
551	TRUE	Empty	MULTISPECIES: FMN-dependent NADPH-azoreductase [Bacteria]	gi|446599915		21 kDa		0.39	0.8	[]	unknown	8	6	6	4	4	2
552	TRUE	Empty	bifunctional preprotein translocase subunit SecD/SecF [Staphylococcus aureus subsp. aureus NCTC 8325]	gi|161353523 (+1)		84 kDa		0.4	0.8	[]	unknown	9	9	7	5	3	0
553	TRUE	Empty	MULTISPECIES: GntR family transcriptional regulator [Bacteria]	gi|446117277		29 kDa		0.062	0	[]	unknown	4	4	0	1	2	0
554	TRUE	Empty	amino acid ABC transporter ATP-binding protein [Staphylococcus aureus subsp. aureus NCTC 8325]	gi|88196382-DECOY		?		1	INF	[]	unknown	0	0	0	2	0	0
555	TRUE	Empty	hypothetical protein SAOUHSC_01821 [Staphylococcus aureus subsp. aureus NCTC 8325]	gi|88195521		36 kDa		0.16	1.6	[]	unknown	10	15	16	5	3	0
556	TRUE	Empty	hypothetical protein SAOUHSC_02935 [Staphylococcus aureus subsp. aureus NCTC 8325]	gi|88196562		22 kDa		0.5	0.8	[]	unknown	6	8	5	3	1	0
557	TRUE	Empty	amino acid ABC transporter permease [Staphylococcus aureus subsp. aureus NCTC 8325]	gi|88194497		56 kDa		0.31	0.3	[]	unknown	3	2	1	0	0	0
558	TRUE	Empty	threonine synthase [Staphylococcus aureus subsp. aureus NCTC 8325]	gi|88195051		38 kDa		0.24	1.4	[]	unknown	14	19	19	4	6	1
559	TRUE	Empty	MULTISPECIES: hypothetical protein [Bacteria]	gi|446658212		19 kDa		0.018	0.4	[]	unknown	20	12	8	2	3	0
560	TRUE	Empty	RecName: Full=Regulatory protein MsrR	gi|73621230		37 kDa		0.031	0	[]	unknown	5	5	0	1	0	0
561	TRUE	Empty	RNA polymerase sigma factor SigB [Staphylococcus aureus subsp. aureus NCTC 8325]	gi|88195964		29 kDa		0.31	0.7	[]	unknown	10	10	7	5	3	0
562	TRUE	Empty	hypothetical protein [Staphylococcus aureus]	gi|446090130		66 kDa	TRUE	0.38	0.7	[]	unknown	6	3	4	0	0	0
563	TRUE	Empty	hypothetical protein SAOUHSC_01163 [Staphylococcus aureus subsp. aureus NCTC 8325]	gi|88194903		35 kDa		0.13	0.4	[]	unknown	9	6	4	6	3	3
564	TRUE	Empty	hypothetical protein SAOUHSC_01415 [Staphylococcus aureus subsp. aureus NCTC 8325]	gi|88195141		30 kDa		0.38	1.1	[]	unknown	20	27	23	17	12	5
565	TRUE	Empty	RecName: Full=Thymidylate synthase; Short=TS; Short=TSase	gi|123291799		37 kDa		0.5	0.8	[]	unknown	6	4	5	0	2	0
566	TRUE	Empty	hypothetical protein SAOUHSC_02258 [Staphylococcus aureus subsp. aureus NCTC 8325]	gi|88195929		24 kDa		0.5	0.9	[]	unknown	9	8	8	1	1	0
567	TRUE	Empty	MULTISPECIES: cell division protein DivIVA [Bacteria]	gi|447039808		24 kDa		0.38	1.2	[]	unknown	18	16	21	11	12	11
568	TRUE	Empty	cell division protein FtsK [Staphylococcus aureus]	gi|445957912		88 kDa		0.75	1	[]	unknown	1	2	1	0	0	0
569	TRUE	Empty	RecName: Full=N utilization substance protein B homolog; Short=Protein NusB	gi|119390828		15 kDa		0.59	1	[]	unknown	9	9	9	3	3	0
570	TRUE	Empty	RecName: Full=Aspartate carbamoyltransferase; AltName: Full=Aspartate transcarbamylase; Short=ATCase	gi|122539727		33 kDa		0.31	0.8	[]	unknown	21	17	17	6	6	4
571	TRUE	Empty	RecName: Full=Putative pyruvate, phosphate dikinase regulatory protein; Short=PPDK regulatory protein	gi|122539411		31 kDa		0.15	0.6	[]	unknown	15	12	9	4	3	0
572	TRUE	Empty	CCA-adding enzyme [Staphylococcus aureus]	gi|446283689		46 kDa		0.39	1.4	[]	unknown	5	6	7	3	2	0
573	TRUE	Empty	nickel ABC transporter substrate-binding protein [Staphylococcus aureus]	gi|446592307		55 kDa	TRUE	0.18	0.6	[]	unknown	12	13	7	1	1	0
574	TRUE	Empty	MULTISPECIES: accessory Sec system glycosyltransferase GtfA [Bacteria]	gi|446080578		58 kDa		1	INF	[]	unknown	0	1	0	0	0	0
575	TRUE	Empty	RecName: Full=GTPase Era	gi|317374940		34 kDa		0.5	1.1	[]	unknown	8	9	9	3	0	0
576	TRUE	Empty	RecName: Full=Conserved virulence factor B	gi|123291800		34 kDa		0.35	1.2	[]	unknown	12	14	15	7	7	6
577	TRUE	Empty	riboflavin biosynthesis protein RibBA [Staphylococcus aureus]	gi|447081766		44 kDa		0.14	3	[]	unknown	2	2	6	0	0	0
578	TRUE	Empty	RecName: Full=Octanoyltransferase LipM; AltName: Full=Octanoyl-[acyl-carrier-protein]:[GcvH] N-octanoyltransferase	gi|122539431		32 kDa		0.13	0.4	[]	unknown	9	7	4	11	4	0
579	TRUE	Empty	RecName: Full=Pantothenate synthetase; Short=PS; AltName: Full=Pantoate--beta-alanine ligase; AltName: Full=Pantoate-activating enzyme	gi|122538590		32 kDa		0.5	1.1	[]	unknown	13	13	14	0	2	0
580	TRUE	Empty	RecName: Full=Pyrimidine-nucleoside phosphorylase; Short=PYNP	gi|119390861		46 kDa		0.34	0.8	[]	unknown	14	11	11	1	2	1
581	TRUE	Empty	MULTISPECIES: D-alanyl-lipoteichoic acid biosynthesis protein DltD [Bacteria]	gi|446692070		45 kDa		0.032	2.8	[]	unknown	5	12	14	2	4	0
582	TRUE	Empty	MULTISPECIES: non-canonical purine NTP pyrophosphatase [Bacteria]	gi|446581971		21 kDa		0.29	1.3	[]	unknown	12	19	16	7	8	2
583	TRUE	Empty	RecName: Full=Putative NAD(P)H nitroreductase SAOUHSC_02829	gi|122538658		25 kDa		0.23	1.4	[]	unknown	12	16	17	4	4	1
584	TRUE	Empty	MULTISPECIES: succinate dehydrogenase iron-sulfur subunit [Bacteria]	gi|446061857		31 kDa		0.0078	0	[]	unknown	7	4	0	2	3	0
585	TRUE	Empty	MULTISPECIES: hypothetical protein [Bacteria]	gi|446102375		51 kDa		0.21	1.8	[]	unknown	5	8	9	2	0	0
586	TRUE	Empty	multidrug efflux protein [Staphylococcus aureus]	gi|446660901		23 kDa		0.69	1	[]	unknown	2	1	2	0	0	0
587	TRUE	Empty	RecName: Full=Phenol-soluble modulin alpha 4 peptide	gi|206557899		2 kDa		0.25	0	[]	unknown	2	2	0	0	1	0
588	TRUE	Empty	RecName: Full=Histidine protein kinase SaeS; AltName: Full=Sensor protein SaeS; AltName: Full=Staphylococcus exoprotein expression protein S	gi|123003529		40 kDa		0.5	0.7	[]	unknown	3	3	2	0	0	0
589	TRUE	Empty	hypothetical protein SAOUHSC_00838 [Staphylococcus aureus subsp. aureus NCTC 8325]	gi|88194596		34 kDa		0.5	1.3	[]	unknown	3	3	4	1	1	0
590	TRUE	Empty	MULTISPECIES: haloacid dehalogenase [Bacteria]	gi|446589751		24 kDa		0.5	0.5	[]	unknown	2	1	1	0	0	0
591	TRUE	Empty	sucrose operon repressor [Staphylococcus aureus subsp. aureus NCTC 8325]	gi|88195939		35 kDa		0.5	0	[]	unknown	1	2	0	0	0	0
592	TRUE	Empty	RecName: Full=PTS system glucose-specific EIICBA component; AltName: Full=EIICBA-Glc; Short=EII-Glc; Includes: RecName: Full=Glucose permease IIC component; AltName: Full=PTS system glucose-specific EIIC component; Includes: RecName: Full=Glucose-specific phosphotransferase enzyme IIB component; AltName: Full=PTS system glucose-specific EIIB component; Includes: RecName: Full=Glucose-specific pho…	gi|209573761		74 kDa	TRUE	0.29	0.6	[]	unknown	8	6	5	5	1	0
593	TRUE	Empty	glutamate synthase subunit beta [Staphylococcus aureus subsp. aureus NCTC 8325]	gi|88194227		54 kDa		1	INF	[]	unknown	0	3	0	0	1	0
594	TRUE	Empty	dephospho-CoA kinase [Staphylococcus aureus subsp. aureus NCTC 8325]	gi|88195495		24 kDa		0.33	0.8	[]	unknown	12	13	9	8	8	2
595	TRUE	Empty	MULTISPECIES: nitrogen-fixing protein NifU [Bacteria]	gi|446933252		17 kDa		0.35	1.2	[]	unknown	12	15	15	8	4	0
596	TRUE	Empty	RecName: Full=Cell division protein DivIB	gi|122539742		50 kDa		0.31	3	[]	unknown	1	5	3	0	0	0
597	TRUE	Empty	hypothetical protein SAOUHSC_00808 [Staphylococcus aureus subsp. aureus NCTC 8325]	gi|88194568		28 kDa	TRUE	0.66	1	[]	unknown	3	1	3	0	0	0
598	TRUE	Empty	carboxylesterase [Staphylococcus aureus subsp. aureus NCTC 8325]	gi|88194562		28 kDa		0.62	1	[]	unknown	5	4	5	2	0	0
599	TRUE	Empty	hypothetical protein SAOUHSC_00584 [Staphylococcus aureus subsp. aureus NCTC 8325]	gi|88194358		52 kDa		0.11	5	[]	unknown	1	4	5	1	0	0
600	TRUE	Empty	MULTISPECIES: phosphopantothenoylcysteine decarboxylase [Bacteria]	gi|446644819		44 kDa		0.3	1.5	[]	unknown	6	9	9	3	1	0
601	TRUE	Empty	MULTISPECIES: 30S ribosomal protein S12 [Bacteria]	gi|447065081		15 kDa		< 0.00010	9	2.5mM Cu high, TSB low	unknown	3	30	27	17	0	0
602	TRUE	Empty	RecName: Full=Chorismate synthase; Short=CS; AltName: Full=5-enolpyruvylshikimate-3-phosphate phospholyase	gi|119366070		43 kDa		0.4	1.3	[]	unknown	7	7	9	3	1	0
603	TRUE	Empty	RecName: Full=UPF0637 protein SAOUHSC_01054	gi|122540621		24 kDa		0.3	1.3	[]	unknown	14	16	18	6	6	3
604	TRUE	Empty	hypothetical protein SAOUHSC_01594 [Staphylococcus aureus subsp. aureus NCTC 8325]	gi|88195305		34 kDa		0.34	0.8	[]	unknown	13	13	10	5	5	1
605	TRUE	Empty	MULTISPECIES: 2-ketogluconate reductase [Bacteria]	gi|446161276		35 kDa		0.5	0.9	[]	unknown	10	12	9	3	7	0
606	TRUE	Empty	MULTISPECIES: hypothetical protein [Bacteria]	gi|446311669		48 kDa	TRUE	0.6	1	[]	unknown	7	10	7	3	3	3
607	TRUE	Empty	peptide ABC transporter substrate-binding protein [Staphylococcus aureus]	gi|446119164		62 kDa		1	INF	[]	unknown	0	2	0	0	0	0
608	TRUE	Empty	hypothetical protein SAOUHSC_01838 [Staphylococcus aureus subsp. aureus NCTC 8325]	gi|88195538		46 kDa		0.42	0.9	[]	unknown	15	13	13	4	3	0
609	TRUE	Empty	MULTISPECIES: hypothetical protein [Bacteria]	gi|446978641		11 kDa		0.095	2	[]	unknown	7	11	14	2	0	0
610	TRUE	Empty	hypothetical protein SAOUHSC_00603 [Staphylococcus aureus subsp. aureus NCTC 8325]	gi|88194373		35 kDa		0.43	0.9	[]	unknown	18	21	16	4	3	0
611	TRUE	Empty	RecName: Full=UPF0478 protein SAOUHSC_01855	gi|122540527		18 kDa		0.57	1	[]	unknown	16	16	16	12	5	4
612	TRUE	Empty	hypothetical protein SAOUHSC_02649 [Staphylococcus aureus subsp. aureus NCTC 8325]	gi|88196289		65 kDa		0.61	1	[]	unknown	6	4	6	1	0	0
613	TRUE	Empty	hypothetical protein SAOUHSC_00581 [Staphylococcus aureus subsp. aureus NCTC 8325]	gi|88194355		48 kDa		0.027	2	[]	unknown	13	11	26	4	1	0
614	TRUE	Empty	hydroxymethylglutaryl-CoA reductase [Staphylococcus aureus subsp. aureus NCTC 8325]	gi|88196490		46 kDa		0.5	1.1	[]	unknown	7	9	8	2	0	0
615	TRUE	Empty	ferrochelatase [Staphylococcus aureus subsp. aureus NCTC 8325]	gi|88195654		35 kDa		0.11	0.4	[]	unknown	8	11	3	3	1	0
616	TRUE	Empty	hypothetical protein SAOUHSC_01907 [Staphylococcus aureus subsp. aureus NCTC 8325]	gi|88195602		31 kDa		0.21	0.7	[]	unknown	22	24	16	1	4	0
617	TRUE	Empty	hypothetical protein SAOUHSC_01138 [Staphylococcus aureus subsp. aureus NCTC 8325]	gi|88194880		17 kDa		0.34	0.8	[]	unknown	14	16	11	9	5	4
618	TRUE	Empty	pyrroline-5-carboxylate reductase [Staphylococcus aureus]	gi|446702402		30 kDa		0.57	1	[]	unknown	14	12	14	8	8	4
619	TRUE	Empty	RecName: Full=ATP-dependent DNA helicase RecG	gi|3914612		78 kDa		0.5	1.5	[]	unknown	2	3	3	0	0	0
620	TRUE	Empty	MULTISPECIES: chitinase [Bacteria]	gi|446067644		40 kDa		0.36	1.7	[]	unknown	3	5	5	1	0	0
621	TRUE	Empty	MULTISPECIES: translation initiation factor IF-1 [Bacteria]	gi|447041187		8 kDa		0.035	0.1	[]	unknown	7	4	1	5	3	0
622	TRUE	Empty	replicative DNA helicase [Staphylococcus aureus subsp. aureus NCTC 8325]	gi|88193839		53 kDa		0.31	0.7	[]	unknown	10	6	7	4	3	0
623	TRUE	Empty	Chain P, Structure Of Beta Hairpin Deletion Mutant Of Beta Toxin From Staphylococcus Aureus	gi|320089775		35 kDa	TRUE	0.31	0.7	[]	unknown	10	10	7	2	3	0
624	TRUE	Empty	MULTISPECIES: tRNA pseudouridine synthase B [Bacteria]	gi|446204450		35 kDa		0.25	0.5	[]	unknown	6	3	3	2	0	0
625	TRUE	Empty	RecName: Full=HPr kinase/phosphorylase; Short=HPrK/P; AltName: Full=HPr(Ser) kinase/phosphorylase	gi|122539979		34 kDa		0.5	1.1	[]	unknown	13	15	14	4	1	0
626	TRUE	Empty	hypothetical protein SAOUHSC_00253 [Staphylococcus aureus subsp. aureus NCTC 8325]	gi|88194059		58 kDa		0.5	2	[]	unknown	1	1	2	0	0	0
627	TRUE	Empty	alpha-acetolactate decarboxylase [Staphylococcus aureus subsp. aureus NCTC 8325]	gi|88196119		26 kDa	TRUE	0.12	0.6	[]	unknown	17	12	10	0	0	0
628	TRUE	Empty	MULTISPECIES: esterase [Bacteria]	gi|446543518		36 kDa	TRUE	0.5	0.9	[]	unknown	15	14	14	2	0	0
629	TRUE	Empty	hypothetical protein SAOUHSC_01869 [Staphylococcus aureus subsp. aureus NCTC 8325]	gi|88195566		16 kDa		0.23	1.7	[]	unknown	6	9	10	4	6	0
630	TRUE	Empty	riboflavin biosynthesis protein RibF [Staphylococcus aureus subsp. aureus NCTC 8325]	gi|88194982		37 kDa		0.41	1.2	[]	unknown	9	10	11	4	1	1
631	TRUE	Empty	L-asparaginase [Staphylococcus aureus]	gi|446604410		36 kDa		0.5	1.2	[]	unknown	5	8	6	4	2	0
632	TRUE	Empty	RecName: Full=2-succinyl-5-enolpyruvyl-6-hydroxy-3-cyclohexene-1-carboxylate synthase; Short=SEPHCHC synthase; AltName: Full=Menaquinone biosynthesis protein MenD	gi|122539837		63 kDa		0.36	1.7	[]	unknown	3	3	5	1	0	0
633	TRUE	Empty	MULTISPECIES: glyoxalase [Bacteria]	gi|446786729		30 kDa		0.32	1.4	[]	unknown	8	10	11	4	2	1
634	TRUE	Empty	RecName: Full=S-ribosylhomocysteine lyase; AltName: Full=AI-2 synthesis protein; AltName: Full=Autoinducer-2 production protein LuxS	gi|122538937		18 kDa		0.66	1	[]	unknown	3	7	3	4	3	0
635	TRUE	Empty	MULTISPECIES: phosphate starvation protein PhoH [Bacteria]	gi|447040511		35 kDa		0.57	1	[]	unknown	16	18	16	12	3	1
636	TRUE	Empty	MULTISPECIES: phosphofructokinase [Bacteria]	gi|446563397		33 kDa		0.44	0.9	[]	unknown	23	20	21	3	1	0
637	TRUE	Empty	haloacid dehalogenase [Staphylococcus aureus]	gi|446108458		30 kDa		0.5	0.9	[]	unknown	12	16	11	7	4	3
638	TRUE	Empty	hypothetical protein SAOUHSC_02844 [Staphylococcus aureus subsp. aureus NCTC 8325]	gi|88196477		37 kDa		0.41	1.2	[]	unknown	9	13	11	1	0	0
639	TRUE	Empty	MULTISPECIES: adenine phosphoribosyltransferase [Bacteria]	gi|446286687		19 kDa		0.59	1	[]	unknown	10	8	10	6	4	0
640	TRUE	Empty	alpha amylase family protein [Staphylococcus aureus subsp. aureus NCTC 8325]	gi|88194229		64 kDa		0.5	0	[]	unknown	1	1	0	0	0	0
641	TRUE	Empty	MULTISPECIES: hypothetical protein [Bacteria]	gi|446010340		21 kDa		0.5	0.9	[]	unknown	14	14	13	10	9	3
642	TRUE	Empty	RecName: Full=Protein-arginine kinase	gi|123003498		39 kDa		0.39	0.7	[]	unknown	7	11	5	1	1	0
643	TRUE	Empty	2-oxoglutarate ferredoxin oxidoreductase subunit beta [Staphylococcus aureus]	gi|446112289		31 kDa		0.5	1.1	[]	unknown	7	7	8	4	4	0
644	TRUE	Empty	hypothetical protein SAOUHSC_02138 [Staphylococcus aureus subsp. aureus NCTC 8325]	gi|88195818		41 kDa		0.31	0.3	[]	unknown	3	4	1	1	0	0
645	TRUE	Empty	dihydroxyacetone kinase subunit DhaL [Staphylococcus aureus]	gi|446789947		21 kDa		0.062	0.2	[]	unknown	6	3	1	0	0	0
646	TRUE	Empty	hypothetical protein SAOUHSC_01781 [Staphylococcus aureus subsp. aureus NCTC 8325]	gi|88195482		36 kDa		1	INF	[]	unknown	0	3	0	0	0	0
647	TRUE	Empty	phosphoribosylglycinamide formyltransferase [Staphylococcus aureus subsp. aureus NCTC 8325]	gi|88194770		21 kDa		0.24	0.6	[]	unknown	11	9	7	3	2	0
648	TRUE	Empty	ornithine carbamoyltransferase [Staphylococcus aureus]	gi|446716285		38 kDa	TRUE	1	INF	[]	unknown	0	1	0	0	0	0
649	TRUE	Empty	RecName: Full=Staphopain A; AltName: Full=Staphylococcal cysteine proteinase A; AltName: Full=Staphylopain A; Flags: Precursor	gi|110816431		44 kDa		0.011	3	[]	unknown	6	16	18	0	0	0
650	TRUE	Empty	amino acid ABC transporter ATP-binding protein [Staphylococcus aureus subsp. aureus NCTC 8325]	gi|88196382		46 kDa		0.062	0.2	[]	unknown	6	6	1	0	1	0
651	TRUE	Empty	RecName: Full=Probable nitronate monooxygenase; AltName: Full=Nitroalkane oxidase	gi|122539927		39 kDa		0.5	0.7	[]	unknown	3	6	2	3	2	0
652	TRUE	Empty	epimerase/dehydratase [Staphylococcus aureus subsp. aureus NCTC 8325]	gi|88196375		31 kDa		0.26	1.3	[]	unknown	17	27	22	3	2	0
653	TRUE	Empty	RecName: Full=Phosphoribosylformylglycinamidine cyclo-ligase; AltName: Full=AIR synthase; AltName: Full=AIRS; AltName: Full=Phosphoribosyl-aminoimidazole synthetase	gi|119366334		37 kDa		0.0034	0.3	[]	unknown	24	19	8	9	9	0
654	TRUE	Empty	GTP-binding protein YqeH [Staphylococcus aureus subsp. aureus NCTC 8325]	gi|88195406		41 kDa		0.32	0.7	[]	unknown	11	13	8	5	0	0
655	TRUE	Empty	hypothetical protein SAOUHSC_01255 [Staphylococcus aureus subsp. aureus NCTC 8325]	gi|88194988		49 kDa		0.5	1.1	[]	unknown	11	11	12	6	5	0
656	TRUE	Empty	MULTISPECIES: demethylmenaquinone methyltransferase [Bacteria]	gi|446697338		27 kDa		0.5	0.9	[]	unknown	9	10	8	2	0	0
657	TRUE	Empty	restriction modification system specificity subunit [Staphylococcus aureus subsp. aureus NCTC 8325]	gi|88194193		47 kDa	TRUE	0.6	1	[]	unknown	7	8	7	4	3	0
658	TRUE	Empty	hypothetical protein SAOUHSC_01968 [Staphylococcus aureus subsp. aureus NCTC 8325]	gi|88195660		16 kDa		0.24	1.6	[]	unknown	7	13	11	6	9	1
659	TRUE	Empty	transcriptional regulator [Staphylococcus aureus]	gi|447206356		24 kDa		0.28	1.4	[]	unknown	11	13	15	7	8	2
660	TRUE	Empty	hypothetical protein SAOUHSC_02908 [Staphylococcus aureus subsp. aureus NCTC 8325]	gi|88196536		33 kDa		0.29	0.6	[]	unknown	8	5	5	1	0	0
661	TRUE	Empty	RecName: Full=Uncharacterized peptidase SAOUHSC_01816	gi|123003454		40 kDa		0.41	1.2	[]	unknown	9	10	11	5	3	1
662	TRUE	Empty	RecName: Full=UPF0435 protein SAOUHSC_02093	gi|148841345		8 kDa		0.25	1.3	[]	unknown	15	18	20	5	7	5
663	TRUE	Empty	hypothetical protein SAOUHSC_01723 [Staphylococcus aureus subsp. aureus NCTC 8325]	gi|88195428		93 kDa		0.089	0.3	[]	unknown	7	7	2	2	0	0
664	TRUE	Empty	ribosomal biogenesis GTPase [Staphylococcus aureus subsp. aureus NCTC 8325]	gi|88194951		33 kDa		0.19	0.6	[]	unknown	13	9	8	3	2	0
665	TRUE	Empty	MULTISPECIES: UDP-N-acetylglucosamine 2-epimerase [Bacteria]	gi|446646072		42 kDa		0.62	1	[]	unknown	5	5	5	2	0	0
666	TRUE	Empty	MULTISPECIES: ABC transporter ATP-binding protein [Bacteria]	gi|446685702		33 kDa		0.024	0.3	[]	unknown	13	14	4	6	1	0
667	TRUE	Empty	geranyltranstransferase [Staphylococcus aureus subsp. aureus NCTC 8325]	gi|88195328		33 kDa		0.39	0.8	[]	unknown	8	5	6	3	1	0
668	TRUE	Empty	RecName: Full=Uncharacterized lipoprotein SAOUHSC_00405; Flags: Precursor	gi|143754853		31 kDa	TRUE	0.36	1.2	[]	unknown	13	14	16	7	6	2
669	TRUE	Empty	RecName: Full=Guanylate kinase; AltName: Full=GMP kinase	gi|119371297		24 kDa		0.5	1.1	[]	unknown	8	12	9	7	6	1
670	TRUE	Empty	RecName: Full=Porphobilinogen deaminase; Short=PBG; AltName: Full=Hydroxymethylbilane synthase; Short=HMBS; AltName: Full=Pre-uroporphyrinogen synthase	gi|11386773		34 kDa		0.22	1.5	[]	unknown	11	14	16	4	2	0
671	TRUE	Empty	RecName: Full=Superoxide dismutase [Mn] 1	gi|60415930		23 kDa		0.43	1.1	[]	unknown	16	14	18	16	14	6
672	TRUE	Empty	aminobenzoyl-glutamate utilization protein B [Staphylococcus aureus]	gi|447214244		43 kDa		0.5	1.1	[]	unknown	7	8	8	0	1	0
673	TRUE	Empty	RecName: Full=Orotidine 5'-phosphate decarboxylase; AltName: Full=OMP decarboxylase; Short=OMPDCase; Short=OMPdecase	gi|122539723		26 kDa		0.37	1.2	[]	unknown	16	15	19	9	6	5
674	TRUE	Empty	transcriptional regulator [Staphylococcus aureus]	gi|446611148		28 kDa		0.089	0.3	[]	unknown	7	7	2	3	4	0
675	TRUE	Empty	MULTISPECIES: GntR family transcriptional regulator [Bacteria]	gi|446912877		27 kDa		0.5	0	[]	unknown	1	0	0	0	0	0
676	TRUE	Empty	hypothetical protein SAOUHSC_00754 [Staphylococcus aureus subsp. aureus NCTC 8325]	gi|88194518		34 kDa		1	INF	[]	unknown	0	0	0	0	0	0
677	TRUE	Empty	RecName: Full=Immunoglobulin-binding protein sbi; Flags: Precursor	gi|122538740		50 kDa		0.038	0.3	[]	unknown	12	7	4	0	0	0
678	TRUE	Empty	ABC transporter permease [Staphylococcus aureus]	gi|446065768		72 kDa		0.75	1	[]	unknown	1	1	1	0	0	0
679	TRUE	Empty	gluconate kinase [Staphylococcus aureus subsp. aureus NCTC 8325]	gi|88196442		58 kDa		0.5	0.5	[]	unknown	2	2	1	0	0	0
680	TRUE	Empty	MULTISPECIES: UDP-N-acetyl-D-mannosamine dehydrogenase [Bacteria]	gi|446702151		47 kDa		0.028	0.5	[]	unknown	23	16	11	7	5	0
681	TRUE	Empty	MULTISPECIES: hypothetical protein [Bacteria]	gi|446908361		12 kDa		0.24	1.6	[]	unknown	7	9	11	10	8	2
682	TRUE	Empty	MULTISPECIES: NAD kinase [Bacteria]	gi|447193578		31 kDa		0.34	2	[]	unknown	2	4	4	1	1	0
683	TRUE	Empty	MULTISPECIES: 30S ribosomal protein S20 [Staphylococcus]	gi|447196761		9 kDa		0.64	1	[]	unknown	4	5	4	5	5	1
684	TRUE	Empty	MULTISPECIES: arginine deiminase [Bacteria]	gi|446051556		47 kDa		0.15	0.5	[]	unknown	10	8	5	0	0	0
685	TRUE	Empty	RecName: Full=Uroporphyrinogen decarboxylase; Short=UPD; Short=URO-D	gi|122539215		39 kDa		0.1	0.5	[]	unknown	11	11	5	5	5	1
686	TRUE	Empty	hypothetical protein SAOUHSC_02585 [Staphylococcus aureus subsp. aureus NCTC 8325]	gi|88196228		27 kDa		0.64	1	[]	unknown	4	5	4	3	0	0
687	TRUE	Empty	MULTISPECIES: Rrf2 family transcriptional regulator [Staphylococcus]	gi|446626776		16 kDa	TRUE	0.5	0.9	[]	unknown	20	21	19	15	13	0
688	TRUE	Empty	MULTISPECIES: serine/threonine protein kinase [Bacteria]	gi|446501710		74 kDa		0.5	0	[]	unknown	1	0	0	0	0	0
689	TRUE	Empty	hypothetical protein SAOUHSC_00989 [Staphylococcus aureus subsp. aureus NCTC 8325]	gi|88194746		43 kDa		0.5	0	[]	unknown	1	2	0	0	0	0
690	TRUE	Empty	alpha-D-1,4-glucosidase [Staphylococcus aureus subsp. aureus NCTC 8325]	gi|88195312		64 kDa		0.31	0.3	[]	unknown	3	4	1	2	0	0
691	TRUE	Empty	citrate synthase [Staphylococcus aureus]	gi|446751911		43 kDa	TRUE	0.5	2	[]	unknown	1	0	2	4	1	0
692	TRUE	Empty	hypothetical protein [Staphylococcus aureus]	gi|446650710		38 kDa		1	INF	[]	unknown	0	2	0	0	0	0
693	TRUE	Empty	RecName: Full=Uridylate kinase; Short=UK; AltName: Full=Uridine monophosphate kinase; Short=UMP kinase; Short=UMPK	gi|123407058		26 kDa		0.6	1	[]	unknown	8	18	8	6	6	1
694	TRUE	Empty	recombination factor protein RarA [Staphylococcus aureus subsp. aureus NCTC 8325]	gi|161353524		47 kDa		0.11	0.2	[]	unknown	5	4	1	0	3	0
695	TRUE	Empty	RecName: Full=Phenol-soluble modulin alpha 1 peptide	gi|206557863		2 kDa	TRUE	< 0.00010	0.04	2.5mM Cu low, TSB high	unknown	25	5	1	3	1	0
696	TRUE	Empty	23S rRNA (adenine(2503)-C(2))-methyltransferase RlmN [Staphylococcus aureus]	gi|446549551		42 kDa		0.59	1	[]	unknown	10	8	10	4	0	0
697	TRUE	Empty	hypothetical protein SAOUHSC_01284 [Staphylococcus aureus subsp. aureus NCTC 8325]	gi|88195016		45 kDa		0.5	0.9	[]	unknown	8	9	7	2	0	0
698	TRUE	Empty	hypothetical protein SAOUHSC_00402 [Staphylococcus aureus subsp. aureus NCTC 8325]	gi|88194197		31 kDa	TRUE	0.5	0	[]	unknown	1	1	0	0	0	0
699	TRUE	Empty	RecName: Full=Peptide methionine sulfoxide reductase MsrB; AltName: Full=Peptide-methionine (R)-S-oxide reductase	gi|59799842		16 kDa		0.5	0.8	[]	unknown	6	7	5	2	1	0
700	TRUE	Empty	hypothetical protein SAOUHSC_01332 [Staphylococcus aureus subsp. aureus NCTC 8325]	gi|88195062		34 kDa		0.23	0.4	[]	unknown	5	2	2	0	0	0
701	TRUE	Empty	hypothetical protein SAOUHSC_01283 [Staphylococcus aureus subsp. aureus NCTC 8325]	gi|88195015		47 kDa		1	INF	[]	unknown	0	1	0	0	0	0
702	TRUE	Empty	alanine dehydrogenase [Staphylococcus aureus]	gi|446882173		40 kDa		0.062	0	[]	unknown	4	2	0	0	0	0
703	TRUE	Empty	acetyl-CoA carboxylase biotin carboxyl carrier protein [Staphylococcus aureus]	gi|446932260		17 kDa		0.41	1.2	[]	unknown	8	15	10	13	9	5
704	TRUE	Empty	MULTISPECIES: regulatory protein Spx [Bacteria]	gi|446180148		15 kDa		0.17	0.5	[]	unknown	11	11	6	6	4	2
705	TRUE	Empty	RecName: Full=N-acetylmuramoyl-L-alanine amidase sle1; Flags: Precursor	gi|114149220		36 kDa		0.0067	0.4	[]	unknown	24	20	9	0	7	3
706	TRUE	Empty	RecName: Full=Pyridoxal 5'-phosphate synthase subunit PdxT; AltName: Full=Pdx2; AltName: Full=Pyridoxal 5'-phosphate synthase glutaminase subunit	gi|119388918		21 kDa		0.5	1.1	[]	unknown	12	15	13	8	7	2
707	TRUE	Empty	5-methyltetrahydropteroyltriglutamate--homocysteine S-methyltransferase [Staphylococcus aureus subsp. aureus NCTC 8325]	gi|88194138		85 kDa		0.31	3	[]	unknown	1	5	3	0	1	0
708	TRUE	Empty	RecName: Full=Chromosomal replication initiator protein DnaA	gi|123291872		52 kDa		0.5	0.8	[]	unknown	4	2	3	0	0	0
709	TRUE	Empty	MULTISPECIES: hypothetical protein [Staphylococcus]	gi|446056924		12 kDa		0.4	1.3	[]	unknown	6	7	8	2	3	2
710	TRUE	Empty	RecName: Full=tRNA (guanine-N(1)-)-methyltransferase; AltName: Full=M1G-methyltransferase; AltName: Full=tRNA [GM37] methyltransferase	gi|119371001		28 kDa		1	INF	[]	unknown	0	0	0	0	0	0
711	TRUE	Empty	hypothetical protein [Staphylococcus aureus]	gi|446169054		9 kDa		0.25	0	[]	unknown	2	0	0	0	0	0
712	TRUE	Empty	MULTISPECIES: acetyltransferase [Bacteria]	gi|446542848		20 kDa		0.26	0.7	[]	unknown	13	11	9	3	1	0
713	TRUE	Empty	phi PVL orfs 18-19-like protein [Staphylococcus aureus subsp. aureus NCTC 8325]	gi|88195857		57 kDa		1	INF	[]	unknown	0	0	0	0	0	1
714	TRUE	Empty	MULTISPECIES: GTP pyrophosphokinase [Bacteria]	gi|447000427		25 kDa		0.4	1.3	[]	unknown	7	11	9	5	4	0
715	TRUE	Empty	hypothetical protein SAOUHSC_00307 [Staphylococcus aureus subsp. aureus NCTC 8325]	gi|88194108		36 kDa		0.5	INF	[]	unknown	0	2	1	0	0	0
716	TRUE	Empty	MULTISPECIES: transcriptional regulator [Bacteria]	gi|446799500		30 kDa		0.36	1.7	[]	unknown	3	5	5	3	2	0
717	TRUE	Empty	RecName: Full=Ferredoxin--NADP reductase; Short=FNR; Short=Fd-NADP(+) reductase	gi|122538773		38 kDa		0.5	INF	[]	unknown	0	2	1	0	1	0
718	TRUE	Empty	hypothetical protein SAOUHSC_02751 [Staphylococcus aureus subsp. aureus NCTC 8325]	gi|88196387		52 kDa		0.062	0.2	[]	unknown	6	10	1	2	0	0
719	TRUE	Empty	MULTISPECIES: hypothetical protein [Bacteria]	gi|445948453		8 kDa		0.35	1.3	[]	unknown	11	16	14	5	3	3
720	TRUE	Empty	RNA methyltransferase [Staphylococcus aureus subsp. aureus NCTC 8325]	gi|88195795		52 kDa		0.5	0.5	[]	unknown	2	1	1	0	0	0
721	TRUE	Empty	MULTISPECIES: hypothetical protein [Bacteria]	gi|446413900		24 kDa		0.5	1.1	[]	unknown	9	8	10	6	3	0
722	TRUE	Empty	hypothetical protein SAOUHSC_00079 [Staphylococcus aureus subsp. aureus NCTC 8325]	gi|88193894		66 kDa		1	INF	[]	unknown	0	1	0	0	0	0
723	TRUE	Empty	peptidase T [Staphylococcus aureus subsp. aureus NCTC 8325]	gi|88195317		40 kDa		0.1	1.7	[]	unknown	11	15	19	6	4	2
724	TRUE	Empty	MULTISPECIES: hypothetical protein [Bacteria]	gi|446974300		20 kDa		0.64	1	[]	unknown	4	5	4	2	3	0
725	TRUE	Empty	hypothetical protein SAOUHSC_01027 [Staphylococcus aureus subsp. aureus NCTC 8325]	gi|88194780		20 kDa		0.31	0.7	[]	unknown	10	6	7	0	0	0
726	TRUE	Empty	MULTISPECIES: hypothetical protein [Bacteria]	gi|447186732		26 kDa	TRUE	0.3	1.5	[]	unknown	6	10	9	1	1	0
727	TRUE	Empty	S-adenosyl-methyltransferase MraW [Staphylococcus aureus subsp. aureus NCTC 8325]	gi|88194885		35 kDa		0.11	0.6	[]	unknown	16	12	9	5	4	0
728	TRUE	Empty	MULTISPECIES: RNA-binding protein [Bacteria]	gi|446877975		11 kDa		0.5	1.3	[]	unknown	3	4	4	4	8	2
729	TRUE	Empty	2-oxoisovalerate dehydrogenase, E1 component subunit beta [Staphylococcus aureus subsp. aureus NCTC 8325]	gi|88195323-DECOY		?		1	INF	[]	unknown	0	0	0	1	0	0
730	TRUE	Empty	MULTISPECIES: SAM-dependent methyltransferase [Bacteria]	gi|446607733		45 kDa		0.34	1.3	[]	unknown	10	12	13	0	4	0
731	TRUE	Empty	RecName: Full=ATP synthase subunit delta; AltName: Full=ATP synthase F(1) sector subunit delta; AltName: Full=F-type ATPase subunit delta; Short=F-ATPase subunit delta	gi|123291763		20 kDa		0.3	0.7	[]	unknown	9	8	6	4	6	0
732	TRUE	Empty	RecName: Full=Uridine kinase; AltName: Full=Cytidine monophosphokinase; AltName: Full=Uridine monophosphokinase	gi|122539376		24 kDa		0.4	1.3	[]	unknown	7	4	9	1	0	0
733	TRUE	Empty	MULTISPECIES: acyl-CoA thioester hydrolase [Bacteria]	gi|446128178		15 kDa		0.09	3.5	[]	unknown	2	4	7	1	0	0
734	TRUE	Empty	RecName: Full=Protein NagD homolog	gi|122064537		28 kDa		0.5	1.1	[]	unknown	12	12	13	11	6	5
735	TRUE	Empty	hypothetical protein SAOUHSC_02146 [Staphylococcus aureus subsp. aureus NCTC 8325]	gi|88195826		40 kDa		0.62	1	[]	unknown	5	6	5	3	0	0
736	TRUE	Empty	MULTISPECIES: nitrogen-fixing protein NifU [Bacteria]	gi|447064627		9 kDa		0.5	0.9	[]	unknown	10	10	9	8	4	3
737	TRUE	Empty	RecName: Full=50S ribosomal protein L9	gi|119370966		17 kDa		0.15	0.6	[]	unknown	20	9	13	4	0	0
738	TRUE	Empty	pencillin binding protein 4 [Staphylococcus aureus subsp. aureus NCTC 8325]	gi|1864022		48 kDa	TRUE	0.5	0	[]	unknown	1	0	0	0	0	0
739	TRUE	Empty	methionine import ATP-binding protein MetN 1 [Staphylococcus aureus]	gi|446491432		39 kDa		1	INF	[]	unknown	0	2	0	0	0	0
740	TRUE	Empty	hypothetical protein SAOUHSC_00030 [Staphylococcus aureus subsp. aureus NCTC 8325]	gi|88193851		68 kDa		0.36	0.6	[]	unknown	5	4	3	1	1	0
741	TRUE	Empty	RecName: Full=Immunoglobulin G-binding protein A; Short=IgG-binding protein A; AltName: Full=Staphylococcal protein A; Flags: Precursor	gi|110283003		56 kDa	TRUE	1	INF	[]	unknown	0	0	0	0	0	0
742	TRUE	Empty	MULTISPECIES: hypothetical protein [Bacteria]	gi|446349057		10 kDa		0.42	1.2	[]	unknown	10	14	12	9	10	6
743	TRUE	Empty	ribosome silencing factor RsfS [Staphylococcus aureus]	gi|447010766		13 kDa		0.38	0.7	[]	unknown	6	6	4	5	4	1
744	TRUE	Empty	MULTISPECIES: ribosome-binding factor A [Bacteria]	gi|446019467		14 kDa		0.14	0.3	[]	unknown	6	9	2	3	1	0
745	TRUE	Empty	MULTISPECIES: hypothetical protein [Bacteria]	gi|446759209		11 kDa		0.5	0.7	[]	unknown	3	4	2	4	4	2
746	TRUE	Empty	RecName: Full=Probable GTP-binding protein EngB	gi|119369264		23 kDa		0.6	1	[]	unknown	8	8	8	3	1	0
747	TRUE	Empty	RecName: Full=Probable quinol oxidase subunit 1; AltName: Full=Quinol oxidase polypeptide I	gi|123291824		75 kDa		0.0037	0.2	[]	unknown	15	6	3	1	1	0
748	TRUE	Empty	formate dehydrogenase [Staphylococcus aureus subsp. aureus NCTC 8325]	gi|88193954		38 kDa		0.13	INF	[]	unknown	0	1	3	0	1	0
749	TRUE	Empty	MULTISPECIES: lysophospholipase [Bacteria]	gi|446188241		32 kDa		0.25	0	[]	unknown	2	0	0	0	0	0
750	TRUE	Empty	MULTISPECIES: cyclic pyranopterin monophosphate synthase [Bacteria]	gi|446152318		39 kDa		0.5	0.7	[]	unknown	3	3	2	0	0	0
751	TRUE	Empty	MULTISPECIES: hypothetical protein [Bacteria]	gi|446445810		18 kDa		0.25	0	[]	unknown	2	1	0	2	0	0
752	TRUE	Empty	bacillithiol biosynthesis deacetylase BshB2 [Staphylococcus aureus]	gi|446051208		25 kDa		0.36	1.7	[]	unknown	3	2	5	1	0	0
753	TRUE	Empty	haloacid dehalogenase [Staphylococcus aureus]	gi|446287499		28 kDa		0.5	0	[]	unknown	1	0	0	0	0	0
754	TRUE	Empty	RecName: Full=Isopentenyl-diphosphate delta-isomerase; Short=IPP isomerase; AltName: Full=Isopentenyl diphosphate:dimethylallyl diphosphate isomerase; AltName: Full=Isopentenyl pyrophosphate isomerase; AltName: Full=Type 2 isopentenyl diphosphate isomerase; Short=IDI-2	gi|122538789		39 kDa		0.23	1.7	[]	unknown	6	7	10	3	2	0
755	TRUE	Empty	RecName: Full=UDP-N-acetylglucosamine--N-acetylmuramyl-(pentapeptide) pyrophosphoryl-undecaprenol N-acetylglucosamine transferase; AltName: Full=Undecaprenyl-PP-MurNAc-pentapeptide-UDPGlcNAc GlcNAc transferase	gi|122539575		40 kDa		0.13	0.4	[]	unknown	9	8	4	1	0	0
756	TRUE	Empty	MULTISPECIES: allophanate hydrolase [Bacteria]	gi|445944468		38 kDa		0.5	1.5	[]	unknown	2	2	3	0	0	0
757	TRUE	Empty	hypothetical protein SAOUHSC_00763 [Staphylococcus aureus subsp. aureus NCTC 8325]	gi|88194526		24 kDa		0.5	1.2	[]	unknown	6	6	7	4	2	0
758	TRUE	Empty	RecName: Full=Uncharacterized leukocidin-like protein 1; Flags: Precursor	gi|122539026		39 kDa		0.00014	0.06	2.5mM Cu low, TSB high	unknown	16	4	1	0	0	0
759	TRUE	Empty	RecName: Full=Formimidoylglutamase; AltName: Full=Formiminoglutamase; AltName: Full=Formiminoglutamate hydrolase	gi|118582039		35 kDa		0.58	1	[]	unknown	11	10	11	5	6	0
760	TRUE	Empty	RecName: Full=Phosphatidylglycerol lysyltransferase; AltName: Full=Lysylphosphatidylglycerol synthase; Short=LPG synthase; AltName: Full=Multiple peptide resistance factor	gi|110810462		97 kDa		0.69	1	[]	unknown	2	3	2	0	0	0
761	TRUE	Empty	MULTISPECIES: hypothetical protein [Bacteria]	gi|446289564		16 kDa		0.5	0.9	[]	unknown	7	8	6	5	5	1
762	TRUE	Empty	hypothetical protein SAOUHSC_02009 [Staphylococcus aureus subsp. aureus NCTC 8325]	gi|88195697		58 kDa		0.69	1	[]	unknown	2	1	2	0	0	0
763	TRUE	Empty	competence-damage inducible protein cinA [Staphylococcus aureus subsp. aureus NCTC 8325]	gi|88194994		43 kDa		0.39	0.7	[]	unknown	7	8	5	1	2	0
764	TRUE	Empty	hypothetical protein SAOUHSC_01895 [Staphylococcus aureus subsp. aureus NCTC 8325]	gi|88195590		33 kDa		0.69	1	[]	unknown	2	2	2	2	2	0
765	TRUE	Empty	RecName: Full=Uncharacterized leukocidin-like protein 2; Flags: Precursor	gi|122539025		40 kDa		< 0.00010	0.1	2.5mM Cu low, TSB high	unknown	22	12	3	3	0	0
766	TRUE	Empty	A/G-specific adenine glycosylase [Staphylococcus aureus]	gi|446206897		41 kDa		0.75	1	[]	unknown	1	1	1	0	0	0
767	TRUE	Empty	hypothetical protein SAOUHSC_00480 [Staphylococcus aureus subsp. aureus NCTC 8325]	gi|88194265		45 kDa		0.13	2.2	[]	unknown	4	5	9	1	1	0
768	TRUE	Empty	RecName: Full=6-phospho-beta-galactosidase; AltName: Full=Beta-D-phosphogalactoside galactohydrolase; Short=PGALase; AltName: Full=P-beta-Gal; Short=PBG	gi|118572757		55 kDa		1	INF	[]	unknown	0	1	0	0	0	0
769	TRUE	Empty	MULTISPECIES: radical SAM protein [Bacteria]	gi|446448684		36 kDa		0.5	0.8	[]	unknown	5	4	4	1	1	0
770	TRUE	Empty	RecName: Full=Transcriptional regulatory protein SrrA; AltName: Full=Staphylococcal respiratory response protein A	gi|123291792		28 kDa		0.15	0.6	[]	unknown	15	13	9	9	5	0
771	TRUE	Empty	MULTISPECIES: tyrosine recombinase XerD [Bacteria]	gi|446369878		34 kDa		0.5	0.5	[]	unknown	2	2	1	0	0	0
772	TRUE	Empty	thioredoxin [Staphylococcus aureus subsp. aureus NCTC 8325]	gi|88194592		12 kDa		0.43	0.9	[]	unknown	20	17	18	17	15	11
773	TRUE	Empty	RecName: Full=4-diphosphocytidyl-2-C-methyl-D-erythritol kinase; Short=CMK; AltName: Full=4-(cytidine-5'-diphospho)-2-C-methyl-D-erythritol kinase	gi|122540156		31 kDa		0.69	1	[]	unknown	2	5	2	0	0	0
774	TRUE	Empty	transcriptional regulator [Staphylococcus aureus]	gi|446075675		24 kDa		0.39	0.7	[]	unknown	7	8	5	0	2	0
775	TRUE	Empty	capsular polysaccharide biosynthesis protein Cap5I [Staphylococcus aureus subsp. aureus NCTC 8325]	gi|88193935		43 kDa		0.14	0.3	[]	unknown	6	2	2	0	0	0
776	TRUE	Empty	MULTISPECIES: DNA repair exonuclease [Bacteria]	gi|446160372		46 kDa		0.6	1	[]	unknown	8	3	8	0	4	0
777	TRUE	Empty	hypothetical protein SAOUHSC_00022 [Staphylococcus aureus subsp. aureus NCTC 8325]	gi|88193843		49 kDa		0.5	0	[]	unknown	1	0	0	0	0	0
778	TRUE	Empty	MULTISPECIES: thymidine kinase [Bacteria]	gi|446195501		22 kDa		0.59	1	[]	unknown	9	6	9	6	3	0
779	TRUE	Empty	MULTISPECIES: hypothetical protein [Bacteria]	gi|446537366		19 kDa		0.42	1.2	[]	unknown	10	11	12	7	6	0
780	TRUE	Empty	MULTISPECIES: pseudouridine synthase B [Bacteria]	gi|446081722		28 kDa		0.17	1.8	[]	unknown	6	5	11	8	7	3
781	TRUE	Empty	MULTISPECIES: phosphoglycerate mutase [Bacteria]	gi|446080519		23 kDa		0.17	0.5	[]	unknown	11	8	6	8	4	0
782	TRUE	Empty	MULTISPECIES: hypothetical protein [Bacteria]	gi|446686422		15 kDa		0.3	0.7	[]	unknown	9	5	6	1	1	0
783	TRUE	Empty	diacylglycerol kinase [Staphylococcus aureus]	gi|447154195		35 kDa		0.4	1.3	[]	unknown	7	7	9	6	1	0
784	TRUE	Empty	MULTISPECIES: hypothetical protein [Bacteria]	gi|447014131		33 kDa		0.5	1.2	[]	unknown	4	7	5	3	1	0
785	TRUE	Empty	hypothetical protein SAOUHSC_01915 [Staphylococcus aureus subsp. aureus NCTC 8325]	gi|88195610		38 kDa		1	INF	[]	unknown	0	1	0	0	0	0
786	TRUE	Empty	MULTISPECIES: hypothetical protein [Bacteria]	gi|446605300		29 kDa		0.69	1	[]	unknown	2	2	2	0	0	0
787	TRUE	Empty	RecName: Full=2,3,4,5-tetrahydropyridine-2,6-dicarboxylate N-acetyltransferase; AltName: Full=Tetrahydrodipicolinate N-acetyltransferase; Short=THP acetyltransferase; Short=Tetrahydropicolinate acetylase	gi|122539592		25 kDa		0.41	0.8	[]	unknown	11	12	9	3	2	0
788	TRUE	Empty	MULTISPECIES: Vitamin B12 ABC transporter substrate-binding protein [Bacteria]	gi|446671713		33 kDa		0.38	1.5	[]	unknown	4	2	6	0	0	0
789	TRUE	Empty	MULTISPECIES: homoserine dehydrogenase [Bacteria]	gi|446658518		47 kDa		0.18	1.7	[]	unknown	7	9	12	2	2	0
790	TRUE	Empty	tRNA-dihydrouridine synthase [Staphylococcus aureus]	gi|446584685		38 kDa	TRUE	0.66	1	[]	unknown	3	3	3	2	1	0
791	TRUE	Empty	RecName: Full=Regulatory protein RecX	gi|122540622		32 kDa		0.38	1.5	[]	unknown	4	4	6	0	0	0
792	TRUE	Empty	hypothetical protein [Staphylococcus aureus]	gi|445993496		9 kDa		0.095	2	[]	unknown	7	11	14	5	5	0
793	TRUE	Empty	hypothetical protein SAOUHSC_00686 [Staphylococcus aureus subsp. aureus NCTC 8325]	gi|88194451		11 kDa		0.35	0.8	[]	unknown	15	14	12	7	4	3
794	TRUE	Empty	zinc metalloprotease [Staphylococcus aureus]	gi|446043261		48 kDa	TRUE	1	INF	[]	unknown	0	1	0	0	0	0
795	TRUE	Empty	MutT/nudix family protein [Staphylococcus aureus subsp. aureus NCTC 8325]	gi|88194221		15 kDa		0.69	1	[]	unknown	2	1	2	1	1	0
796	TRUE	Empty	hypothetical protein SAOUHSC_02460 [Staphylococcus aureus subsp. aureus NCTC 8325]	gi|88196112		32 kDa		0.43	1.1	[]	unknown	14	17	16	6	11	1
797	TRUE	Empty	RecName: Full=Carbamate kinase 2	gi|38604739		34 kDa		0.23	0.4	[]	unknown	5	5	2	0	0	0
798	TRUE	Empty	cap5L protein/glycosyltransferase [Staphylococcus aureus subsp. aureus NCTC 8325]	gi|88193938		47 kDa		0.5	0	[]	unknown	1	0	0	0	0	0
799	TRUE	Empty	hypothetical protein SAOUHSC_00547 [Staphylococcus aureus subsp. aureus NCTC 8325]	gi|88194326		57 kDa	TRUE	0.23	0.4	[]	unknown	5	2	2	0	0	0
800	TRUE	Empty	hypothetical protein SAOUHSC_02433 [Staphylococcus aureus subsp. aureus NCTC 8325]	gi|88196087		40 kDa		0.5	0	[]	unknown	1	0	0	0	0	0
801	TRUE	Empty	RecName: Full=Uncharacterized protein SAOUHSC_00997; AltName: Full=ORF1; Flags: Precursor	gi|109940181		46 kDa		0.66	1	[]	unknown	3	2	3	1	0	0
802	TRUE	Empty	capsular polysaccharide biosynthesis protein Cap5I [Staphylococcus aureus subsp. aureus NCTC 8325]	gi|88193935-DECOY		?		1	INF	[]	unknown	0	0	0	0	0	0
803	TRUE	Empty	MULTISPECIES: hypothetical protein [Bacteria]	gi|445943590		15 kDa		0.21	1.8	[]	unknown	5	10	9	5	4	1
804	TRUE	Empty	phosphonate ABC transporter ATP-binding protein [Staphylococcus aureus]	gi|446817205		28 kDa	TRUE	0.41	1.2	[]	unknown	8	13	10	2	7	0
805	TRUE	Empty	RecName: Full=Ketol-acid reductoisomerase; AltName: Full=Acetohydroxy-acid isomeroreductase; AltName: Full=Alpha-keto-beta-hydroxylacyl reductoisomerase	gi|116248162		37 kDa		0.25	INF	[]	unknown	0	8	2	0	0	0
806	TRUE	Empty	hypothetical protein [Staphylococcus aureus]	gi|446107722		30 kDa	TRUE	0.25	0	[]	unknown	2	0	0	0	0	0
807	TRUE	Empty	RecName: Full=Iron-sulfur cluster repair protein ScdA; AltName: Full=Cell wall-related protein ScdA	gi|110282995		25 kDa	TRUE	0.24	0.6	[]	unknown	11	11	7	2	0	0
808	TRUE	Empty	ornithine carbamoyltransferase [Staphylococcus aureus]	gi|446058311		38 kDa	TRUE	0.31	0.7	[]	unknown	10	8	7	0	0	0
809	TRUE	Empty	MULTISPECIES: hypothetical protein [Bacteria]	gi|446093563		13 kDa		0.56	1	[]	unknown	21	11	21	5	14	1
810	TRUE	Empty	MULTISPECIES: transcriptional regulator [Bacteria]	gi|446050511		82 kDa		0.062	0	[]	unknown	4	3	0	0	0	0
811	TRUE	Empty	radical SAM domain-containing protein [Staphylococcus aureus]	gi|447168192		44 kDa	TRUE	1	INF	[]	unknown	0	0	0	0	0	0
812	TRUE	Empty	hypothetical protein SAOUHSC_00408 [Staphylococcus aureus subsp. aureus NCTC 8325]	gi|88194202		12 kDa		0.31	3	[]	unknown	1	1	3	0	1	0
813	TRUE	Empty	MULTISPECIES: 3-demethylubiquinone-9 3-methyltransferase [Bacteria]	gi|446276329		15 kDa		0.5	0.8	[]	unknown	4	0	3	1	0	0
814	TRUE	Empty	hypothetical protein SAOUHSC_01998 [Staphylococcus aureus subsp. aureus NCTC 8325]	gi|88195686		36 kDa		0.23	0.4	[]	unknown	5	5	2	1	0	0
815	TRUE	Empty	MULTISPECIES: peptide chain release factor 2 [Bacteria]	gi|446762869		38 kDa	TRUE	0.66	1	[]	unknown	3	3	3	1	1	1
816	TRUE	Empty	aminotransferase [Staphylococcus aureus]	gi|486200275		43 kDa		0.5	1.3	[]	unknown	3	3	4	0	0	0
817	TRUE	Empty	MULTISPECIES: hypothetical protein [Bacteria]	gi|446614596		9 kDa		0.66	1	[]	unknown	3	3	3	2	4	4
818	TRUE	Empty	MULTISPECIES: ribitol-5-phosphate dehydrogenase [Bacteria]	gi|446532857		38 kDa	TRUE	0.16	1.6	[]	unknown	10	14	16	7	7	2
819	TRUE	Empty	hypothetical protein SAOUHSC_00497 [Staphylococcus aureus subsp. aureus NCTC 8325]	gi|88194279		54 kDa		1	INF	[]	unknown	0	1	0	0	0	0
820	TRUE	Empty	hypothetical protein SAOUHSC_02724 [Staphylococcus aureus subsp. aureus NCTC 8325]	gi|88196364		26 kDa		0.34	2	[]	unknown	2	6	4	1	1	0
821	TRUE	Empty	acetolactate synthase large subunit [Staphylococcus aureus subsp. aureus NCTC 8325]	gi|88195952		64 kDa		0.5	0	[]	unknown	1	1	0	0	0	0
822	TRUE	Empty	MULTISPECIES: hypothetical protein [Bacteria]	gi|446357951		12 kDa	TRUE	0.21	1.8	[]	unknown	5	6	9	3	1	0
823	TRUE	Empty	RecName: Full=5'-methylthioadenosine/S-adenosylhomocysteine nucleosidase; Short=MTA/SAH nucleosidase; Short=MTAN; AltName: Full=5'-methylthioadenosine nucleosidase; Short=MTA nucleosidase; AltName: Full=S-adenosylhomocysteine nucleosidase; Short=AdoHcy nucleosidase; Short=SAH nucleosidase; Short=SRH nucleosidase	gi|122539387		25 kDa		0.044	2.1	[]	unknown	9	12	19	6	7	2
824	TRUE	Empty	hypothetical protein SAOUHSC_02106 [Staphylococcus aureus subsp. aureus NCTC 8325]	gi|88195788		27 kDa		0.66	1	[]	unknown	3	4	3	2	3	0
825	TRUE	Empty	hypothetical protein SAOUHSC_01454 [Staphylococcus aureus subsp. aureus NCTC 8325]	gi|88195173		33 kDa		0.4	1.3	[]	unknown	7	5	9	4	1	0
826	TRUE	Empty	hypothetical protein SAOUHSC_00531 [Staphylococcus aureus subsp. aureus NCTC 8325]	gi|88194311		44 kDa		0.19	0.5	[]	unknown	8	10	4	1	1	0
827	TRUE	Empty	sigmaB regulation protein RsbU, putative [Staphylococcus aureus subsp. aureus NCTC 8325]	gi|87203525		30 kDa		0.2	0.6	[]	unknown	14	13	9	5	5	0
828	TRUE	Empty	RecName: Full=Organic hydroperoxide resistance protein-like	gi|122540446		15 kDa		0.19	2	[]	unknown	4	6	8	3	4	1
829	TRUE	Empty	MULTISPECIES: ornithine cyclodeaminase [Bacteria]	gi|447001200		38 kDa		0.5	INF	[]	unknown	0	2	1	0	0	0
830	TRUE	Empty	membrane protein [Staphylococcus aureus]	gi|446940607		57 kDa		1	INF	[]	unknown	0	2	0	0	0	0
831	TRUE	Empty	haloacid dehalogenase [Staphylococcus aureus]	gi|446207595		24 kDa		0.39	0.7	[]	unknown	7	5	5	2	1	1
832	TRUE	Empty	MULTISPECIES: NADPH-dependent 7-cyano-7-deazaguanine reductase [Bacteria]	gi|446852758		20 kDa		0.5	1.5	[]	unknown	2	2	3	2	0	0
833	TRUE	Empty	MULTISPECIES: diphosphomevalonate decarboxylase [Bacteria]	gi|446519989		37 kDa		0.19	0.5	[]	unknown	8	7	4	6	4	0
834	TRUE	Empty	aminopeptidase PepS [Staphylococcus aureus subsp. aureus NCTC 8325]	gi|88195775-DECOY		?		1	INF	[]	unknown	0	1	0	0	0	0
835	TRUE	Empty	MULTISPECIES: glycerol-3-phosphate responsive antiterminator [Bacteria]	gi|447000379		20 kDa		0.29	1.6	[]	unknown	5	7	8	3	2	0
836	TRUE	Empty	phosphomevalonate kinase [Staphylococcus aureus subsp. aureus NCTC 8325]	gi|88194353		40 kDa		0.24	0.6	[]	unknown	11	8	7	2	0	0
837	TRUE	Empty	hypothetical protein SAOUHSC_00382 [Staphylococcus aureus subsp. aureus NCTC 8325]	gi|88194179		32 kDa		0.29	1.6	[]	unknown	5	5	8	3	1	1
838	TRUE	Empty	hypothetical protein SAOUHSC_00164 [Staphylococcus aureus subsp. aureus NCTC 8325]	gi|88193975		36 kDa		0.5	INF	[]	unknown	0	2	1	0	0	0
839	TRUE	Empty	RecName: Full=Ribosomal RNA small subunit methyltransferase A; AltName: Full=16S rRNA (adenine(1518)-N(6)/adenine(1519)-N(6))-dimethyltransferase; AltName: Full=16S rRNA dimethyladenosine transferase; AltName: Full=16S rRNA dimethylase; AltName: Full=S-adenosylmethionine-6-N', N'-adenosyl(rRNA) dimethyltransferase	gi|119365847		34 kDa	TRUE	0.29	0.6	[]	unknown	8	9	5	5	2	0
840	TRUE	Empty	cardiolipin synthase [Staphylococcus aureus]	gi|447135604		56 kDa	TRUE	0.5	0	[]	unknown	1	0	0	0	0	0
841	TRUE	Empty	DNA primase [Staphylococcus aureus subsp. aureus NCTC 8325]	gi|88195370		69 kDa		0.5	0	[]	unknown	1	0	0	2	0	0
842	TRUE	Empty	hypothetical protein SAOUHSC_00749 [Staphylococcus aureus subsp. aureus NCTC 8325]	gi|88194514		38 kDa		0.25	0	[]	unknown	2	4	0	0	0	0
843	TRUE	Empty	RecName: Full=Uracil-DNA glycosylase; Short=UDG	gi|122540104		25 kDa		0.5	2	[]	unknown	1	3	2	1	2	0
844	TRUE	Empty	hypothetical protein SAOUHSC_02905 [Staphylococcus aureus subsp. aureus NCTC 8325]	gi|88196533		12 kDa		0.32	1.4	[]	unknown	7	6	10	2	3	1
845	TRUE	Empty	MULTISPECIES: glycerate kinase [Bacteria]	gi|447099607		41 kDa		0.5	0	[]	unknown	1	2	0	0	0	0
846	TRUE	Empty	hypothetical protein SAOUHSC_00960 [Staphylococcus aureus subsp. aureus NCTC 8325]	gi|88194717		58 kDa		0.11	0.2	[]	unknown	5	3	1	3	0	0
847	TRUE	Empty	MULTISPECIES: 2-dehydropantoate 2-reductase [Bacteria]	gi|446606710		34 kDa		0.32	1.4	[]	unknown	7	7	10	4	3	1
848	TRUE	Empty	molybdenum ABC transporter substrate-binding protein [Staphylococcus aureus subsp. aureus NCTC 8325]	gi|88196194		29 kDa		0.5	1.5	[]	unknown	2	4	3	0	0	0
849	TRUE	Empty	RecName: Full=ATP-dependent protease subunit HslV	gi|122539695		20 kDa		0.15	0.6	[]	unknown	15	11	9	5	1	1
850	TRUE	Empty	imidazolonepropionase [Staphylococcus aureus]	gi|446921507		45 kDa		0.25	0	[]	unknown	2	0	0	0	0	0
851	TRUE	Empty	hypothetical protein SAOUHSC_1307a [Staphylococcus aureus subsp. aureus NCTC 8325]	gi|542123273		8 kDa		0.11	1.9	[]	unknown	8	11	15	5	6	5
852	TRUE	Empty	MULTISPECIES: DNA-3-methyladenine glycosylase [Bacteria]	gi|446923972		21 kDa		0.5	0.9	[]	unknown	9	4	8	5	3	0
853	TRUE	Empty	hypothetical protein SAOUHSC_02434 [Staphylococcus aureus subsp. aureus NCTC 8325]	gi|88196088		67 kDa		0.31	0.3	[]	unknown	3	2	1	0	0	0
854	TRUE	Empty	hypothetical protein SAOUHSC_00015 [Staphylococcus aureus subsp. aureus NCTC 8325]	gi|88193837		74 kDa		0.19	0.2	[]	unknown	4	2	1	0	0	0
855	TRUE	Empty	MULTISPECIES: acetyl-CoA acetyltransferase [Bacteria]	gi|446993420		41 kDa		0.5	0	[]	unknown	1	0	0	1	0	0
856	TRUE	Empty	hypothetical protein SAOUHSC_01812 [Staphylococcus aureus subsp. aureus NCTC 8325]	gi|88195512		35 kDa		0.17	0.4	[]	unknown	7	5	3	4	1	0
857	TRUE	Empty	hypothetical protein SAOUHSC_02876 [Staphylococcus aureus subsp. aureus NCTC 8325]	gi|88196506		43 kDa		0.5	0	[]	unknown	1	2	0	0	0	0
858	TRUE	Empty	succinyl-diaminopimelate desuccinylase [Staphylococcus aureus subsp. aureus NCTC 8325]	gi|88195916		45 kDa		0.5	1.3	[]	unknown	3	4	4	1	1	0
859	TRUE	Empty	hypothetical protein SAOUHSC_01584 [Staphylococcus aureus subsp. aureus NCTC 8325]	gi|88195295		34 kDa	TRUE	0.5	0.8	[]	unknown	4	4	3	0	1	0
860	TRUE	Empty	MULTISPECIES: signal peptidase II [Bacteria]	gi|447056938		30 kDa		0.13	INF	[]	unknown	0	2	3	2	0	0
861	TRUE	Empty	RecName: Full=Alanine dehydrogenase 2	gi|122539309		40 kDa		0.12	0.5	[]	unknown	12	6	6	4	3	2
862	TRUE	Empty	RecName: Full=Putative sporulation transcription regulator WhiA	gi|122539972		36 kDa		0.5	INF	[]	unknown	0	1	1	1	0	0
863	TRUE	Empty	hypothetical protein SAOUHSC_01727 [Staphylococcus aureus subsp. aureus NCTC 8325]	gi|88195432		42 kDa		0.17	0.4	[]	unknown	7	6	3	2	3	0
864	TRUE	Empty	RecName: Full=tRNA modification GTPase MnmE	gi|122538496		51 kDa		0.4	0.8	[]	unknown	9	7	7	2	0	0
865	TRUE	Empty	hypothetical protein SAOUHSC_00308 [Staphylococcus aureus subsp. aureus NCTC 8325]	gi|88194109		39 kDa		0.69	1	[]	unknown	2	2	2	0	0	0
866	TRUE	Empty	RecName: Full=Superoxide dismutase [Mn/Fe] 2	gi|123003520		23 kDa	TRUE	0.00025	6.7	2.5mM Cu high, TSB low	unknown	3	8	20	3	5	5
867	TRUE	Empty	MULTISPECIES: mevalonate kinase [Bacteria]	gi|446119179		33 kDa		0.00097	0	2.5mM Cu low, TSB high	unknown	10	3	0	2	0	0
868	TRUE	Empty	MULTISPECIES: protein translocase component YidC [Bacteria]	gi|446648456		34 kDa		0.5	2	[]	unknown	1	3	2	0	1	0
869	TRUE	Empty	ParB family chromosome partioning protein [Staphylococcus aureus subsp. aureus NCTC 8325]	gi|88194142		33 kDa		0.75	1	[]	unknown	1	1	1	0	0	0
870	TRUE	Empty	hypothetical protein SAOUHSC_00024 [Staphylococcus aureus subsp. aureus NCTC 8325]	gi|88193845		30 kDa		0.5	0	[]	unknown	1	1	0	0	0	0
871	TRUE	Empty	MULTISPECIES: GTP pyrophosphokinase [Bacteria]	gi|446211281		27 kDa		0.17	2.3	[]	unknown	3	5	7	0	0	0
872	TRUE	Empty	MULTISPECIES: hypothetical protein [Bacteria]	gi|446291867		35 kDa	TRUE	0.3	0.7	[]	unknown	9	8	6	4	2	0
873	TRUE	Empty	ABC transporter ATP-binding protein [Staphylococcus aureus]	gi|446846264		25 kDa		0.75	1	[]	unknown	1	2	1	1	0	0
874	TRUE	Empty	orotate phosphoribosyltransferase [Staphylococcus aureus]	gi|446962995		22 kDa		0.5	0.9	[]	unknown	14	12	13	6	3	0
875	TRUE	Empty	spermidine/putrescine import ATP-binding protein PotA [Staphylococcus aureus]	gi|446355696		41 kDa		0.19	0.2	[]	unknown	4	2	1	3	1	0
876	TRUE	Empty	MULTISPECIES: hypothetical protein [Bacteria]	gi|446372402		51 kDa		0.5	0	[]	unknown	1	2	0	0	0	0
877	TRUE	Empty	MULTISPECIES: zinc ABC transporter ATP-binding protein [Bacteria]	gi|447136652		29 kDa		0.5	0.5	[]	unknown	2	1	1	0	1	0
878	TRUE	Empty	rod shape-determining protein MreC [Staphylococcus aureus subsp. aureus NCTC 8325]	gi|88195460		31 kDa		0.3	0.7	[]	unknown	9	6	6	2	1	0
879	TRUE	Empty	MULTISPECIES: serine dehydratase subunit alpha [Bacteria]	gi|446382566		31 kDa		1	INF	[]	unknown	0	0	0	0	0	0
880	TRUE	Empty	MULTISPECIES: thymidylate kinase [Bacteria]	gi|447194870		23 kDa		0.5	0.9	[]	unknown	8	3	7	4	2	0
881	TRUE	Empty	RecName: Full=Clumping factor A; AltName: Full=Fibrinogen receptor A; AltName: Full=Fibrinogen-binding protein A; Flags: Precursor	gi|114149250 (+1)		96 kDa		0.17	1.5	[]	unknown	11	13	17	1	3	2
882	TRUE	Empty	deoxyribodipyrimidine photolyase [Staphylococcus aureus]	gi|446874793		54 kDa		0.062	0	[]	unknown	4	3	0	0	0	0
883	TRUE	Empty	cap5N protein/UDP-glucose 4-epimerase [Staphylococcus aureus subsp. aureus NCTC 8325]	gi|88193940		34 kDa		0.5	0	[]	unknown	1	0	0	0	0	0
884	TRUE	Empty	MULTISPECIES: methionine ABC transporter substrate-binding protein [Bacteria]	gi|446654980		30 kDa		0.063	INF	[]	unknown	0	0	4	0	0	0
885	TRUE	Empty	MULTISPECIES: nitroreductase [Bacteria]	gi|446345053		21 kDa		0.5	0	[]	unknown	1	4	0	0	2	0
886	TRUE	Empty	capsular polysaccharide biosynthesis protein Cap5B [Staphylococcus aureus subsp. aureus NCTC 8325]	gi|88193928		25 kDa		0.17	0.5	[]	unknown	11	11	6	5	0	0
887	TRUE	Empty	RecName: Full=Putative glycosyltransferase TagX; AltName: Full=Teichoic acid biosynthesis protein X	gi|83305910		41 kDa		0.69	1	[]	unknown	2	4	2	2	1	0
888	TRUE	Empty	MULTISPECIES: hydrolase TatD [Bacteria]	gi|446827056		29 kDa		0.39	0.8	[]	unknown	8	6	6	4	3	1
889	TRUE	Empty	hypothetical protein SAOUHSC_00756 [Staphylococcus aureus subsp. aureus NCTC 8325]	gi|88194520		42 kDa		0.34	2	[]	unknown	2	4	4	0	0	0
890	TRUE	Empty	MULTISPECIES: methionine import ATP-binding protein MetN 2 [Bacteria]	gi|446493364		38 kDa	TRUE	0.64	1	[]	unknown	4	5	4	1	0	0
891	TRUE	Empty	MULTISPECIES: glutathione S-transferase [Bacteria]	gi|446075489		17 kDa		0.17	2.3	[]	unknown	3	5	7	1	2	1
892	TRUE	Empty	MULTISPECIES: hypothetical protein [Bacteria]	gi|446894242		13 kDa		0.28	1.8	[]	unknown	4	6	7	2	1	0
893	TRUE	Empty	haloacid dehalogenase [Staphylococcus aureus]	gi|446942068		22 kDa		0.28	1.8	[]	unknown	4	6	7	3	5	3
894	TRUE	Empty	amino acid transporter [Staphylococcus aureus]	gi|446644207		35 kDa		0.5	0	[]	unknown	1	2	0	0	0	0
895	TRUE	Empty	MULTISPECIES: ABC transporter ATP-binding protein [Bacteria]	gi|446908740		28 kDa		0.25	2	[]	unknown	3	6	6	0	0	0
896	TRUE	Empty	RecName: Full=Histidinol-phosphate aminotransferase; AltName: Full=Imidazole acetol-phosphate transaminase	gi|122540014		40 kDa		0.25	0	[]	unknown	2	2	0	0	0	0
897	TRUE	Empty	MULTISPECIES: LytR family transcriptional regulator [Bacteria]	gi|446753799		35 kDa		0.13	0.4	[]	unknown	9	12	4	1	3	0
898	TRUE	Empty	MULTISPECIES: hypothetical protein [Bacteria]	gi|446414131		17 kDa		0.75	1	[]	unknown	1	1	1	1	1	0
899	TRUE	Empty	cold shock protein [Staphylococcus aureus subsp. aureus NCTC 8325]	gi|88196660		8 kDa	TRUE	0.39	0.7	[]	unknown	7	7	5	6	3	0
900	TRUE	Empty	delta-haemolysin precurser [Staphylococcus aureus subsp. aureus RN4220]	gi|7239368		5 kDa		0.0078	0	[]	unknown	7	1	0	0	0	0
901	TRUE	Empty	hypothetical protein SAOUHSC_01717 [Staphylococcus aureus subsp. aureus NCTC 8325]	gi|88195422		36 kDa		0.36	0.6	[]	unknown	5	6	3	3	0	0
902	TRUE	Empty	RecName: Full=L-threonine dehydratase catabolic TdcB; AltName: Full=Threonine deaminase	gi|122539559		37 kDa		0.11	0.2	[]	unknown	5	5	1	0	0	0
903	TRUE	Empty	hypothetical protein SAOUHSC_01872 [Staphylococcus aureus subsp. aureus NCTC 8325]	gi|88195569		46 kDa		0.5	0.5	[]	unknown	2	1	1	1	1	0
904	TRUE	Empty	RecName: Full=Cell division protein SepF	gi|122539737		21 kDa		0.057	0.4	[]	unknown	14	6	6	4	2	1
905	TRUE	Empty	MULTISPECIES: acetyltransferase [Bacteria]	gi|446963480		33 kDa		0.054	0.2	[]	unknown	8	5	2	2	0	0
906	TRUE	Empty	RecName: Full=Shikimate dehydrogenase (NADP(+)); Short=SDH	gi|122539390		30 kDa		0.36	1.7	[]	unknown	3	4	5	3	2	0
907	TRUE	Empty	MULTISPECIES: chromosome partitioning protein ParB [Bacteria]	gi|446665491		32 kDa		0.29	0.6	[]	unknown	8	3	5	1	2	0
908	TRUE	Empty	alcohol dehydrogenase [Staphylococcus aureus]	gi|446532843		39 kDa	TRUE	0.3	1.5	[]	unknown	6	9	9	1	4	2
909	TRUE	Empty	MULTISPECIES: 2-C-methyl-D-erythritol 4-phosphate cytidylyltransferase [Bacteria]	gi|446561129		27 kDa	TRUE	0.13	2.2	[]	unknown	4	4	9	4	3	3
910	TRUE	Empty	RecName: Full=Argininosuccinate synthase; AltName: Full=Citrulline--aspartate ligase	gi|119361327		44 kDa		0.019	5	[]	unknown	2	1	10	0	0	0
911	TRUE	Empty	glycerophosphoryl diester phosphodiesterase [Staphylococcus aureus subsp. aureus NCTC 8325]	gi|88194820		35 kDa		0.66	1	[]	unknown	3	4	3	2	0	0
912	TRUE	Empty	MULTISPECIES: haloacid dehalogenase [Bacteria]	gi|446376929		25 kDa		0.43	1.2	[]	unknown	13	20	15	9	9	3
913	TRUE	Empty	MULTISPECIES: nitric oxide synthase oxygenase [Bacteria]	gi|446820379		42 kDa		0.062	0	[]	unknown	4	0	0	0	0	0
914	TRUE	Empty	MULTISPECIES: N-acetyltransferase [Bacteria]	gi|446940167		30 kDa		0.25	2	[]	unknown	3	4	6	0	1	1
915	TRUE	Empty	MULTISPECIES: sodium:proton antiporter [Bacteria]	gi|446324317 (+1)		76 kDa		0.75	1	[]	unknown	1	0	1	0	0	0
916	TRUE	Empty	lactate dehydrogenase [Staphylococcus aureus]	gi|446083503		37 kDa		0.38	1.5	[]	unknown	4	6	6	0	0	0
917	TRUE	Empty	RecName: Full=Alpha-hemolysin; Short=Alpha-HL; AltName: Full=Alpha-toxin; Flags: Precursor	gi|122540475		36 kDa		0.016	0	[]	unknown	6	0	0	0	0	0
918	TRUE	Empty	hypothetical protein SAOUHSC_00774 [Staphylococcus aureus subsp. aureus NCTC 8325]	gi|88194536		26 kDa		0.25	INF	[]	unknown	0	0	2	0	0	0
919	TRUE	Empty	hypothetical protein SAOUHSC_01348 [Staphylococcus aureus subsp. aureus NCTC 8325]	gi|88195076		18 kDa		0.6	1	[]	unknown	7	6	7	3	1	0
920	TRUE	Empty	hypothetical protein SAOUHSC_00979 [Staphylococcus aureus subsp. aureus NCTC 8325]	gi|88194736		21 kDa		0.34	2	[]	unknown	2	1	4	2	2	0
921	TRUE	Empty	ABC transporter ATP-binding protein [Staphylococcus aureus]	gi|446914046		35 kDa		0.031	0	[]	unknown	5	2	0	1	1	0
922	TRUE	Empty	hypothetical protein SAOUHSC_01966 [Staphylococcus aureus subsp. aureus NCTC 8325]	gi|88195658		48 kDa		0.5	0	[]	unknown	1	0	0	0	0	0
923	TRUE	Empty	MULTISPECIES: lysine decarboxylase [Bacteria]	gi|446743636		21 kDa		1	INF	[]	unknown	0	0	0	0	1	0
924	TRUE	Empty	hypothetical protein SAOUHSC_00023 [Staphylococcus aureus subsp. aureus NCTC 8325]	gi|88193844		30 kDa		0.5	0	[]	unknown	1	0	0	1	0	3
925	TRUE	Empty	RecName: Full=Glucosamine-6-phosphate deaminase; AltName: Full=GlcN6P deaminase; Short=GNPDA; AltName: Full=Glucosamine-6-phosphate isomerase	gi|122540113		28 kDa		0.42	1.2	[]	unknown	10	11	12	2	2	0
926	TRUE	Empty	endonuclease III [Staphylococcus aureus subsp. aureus NCTC 8325]	gi|88195186		25 kDa		1	INF	[]	unknown	0	1	0	0	0	0
927	TRUE	Empty	D-3-phosphoglycerate dehydrogenase [Staphylococcus aureus]	gi|446731589		58 kDa		0.5	1.2	[]	unknown	5	5	6	1	0	0
928	TRUE	Empty	MULTISPECIES: methyltransferase [Bacteria]	gi|445942449		23 kDa		0.1	0.5	[]	unknown	11	6	5	5	2	0
929	TRUE	Empty	RecName: Full=Uncharacterized hydrolase SAOUHSC_01399	gi|122539591		43 kDa		0.5	1.1	[]	unknown	7	14	8	3	2	0
930	TRUE	Empty	hypothetical protein SAOUHSC_01186 [Staphylococcus aureus subsp. aureus NCTC 8325]	gi|88194925		28 kDa		0.39	0.8	[]	unknown	8	4	6	3	0	0
931	TRUE	Empty	DNA repair protein RecO [Staphylococcus aureus]	gi|446851835		28 kDa		0.5	INF	[]	unknown	0	0	1	0	0	0
932	TRUE	Empty	MULTISPECIES: iron ABC transporter substrate-binding protein [Bacteria]	gi|446967855		37 kDa		0.25	INF	[]	unknown	0	0	2	0	0	0
933	TRUE	Empty	hypothetical protein SAOUHSC_02248 [Staphylococcus aureus subsp. aureus NCTC 8325]	gi|88195920		17 kDa		0.75	1	[]	unknown	1	0	1	0	0	0
934	TRUE	Empty	MULTISPECIES: molybdopterin synthase catalytic subunit [Bacteria]	gi|446731244		17 kDa		0.23	1.7	[]	unknown	6	6	10	2	0	0
935	TRUE	Empty	RecName: Full=Peptide methionine sulfoxide reductase MsrA 2; Short=Protein-methionine-S-oxide reductase 2; AltName: Full=Peptide-methionine (S)-S-oxide reductase 2; Short=Peptide Met(O) reductase 2	gi|59799854		21 kDa		0.66	1	[]	unknown	3	5	3	0	0	0
936	TRUE	Empty	MULTISPECIES: 6-phospho 3-hexuloisomerase [Bacteria]	gi|446974338		20 kDa		0.2	1.4	[]	unknown	14	14	20	4	2	1
937	TRUE	Empty	ABC transporter [Staphylococcus aureus subsp. aureus NCTC 8325]	gi|88194496		38 kDa		0.12	0	[]	unknown	3	4	0	0	0	0
938	TRUE	Empty	hypothetical protein SAOUHSC_02472 [Staphylococcus aureus subsp. aureus NCTC 8325]	gi|88196124		44 kDa		0.5	0	[]	unknown	1	0	0	0	0	0
939	TRUE	Empty	MULTISPECIES: dihydroxyacetone kinase subunit DhaK [Bacteria]	gi|446899013		35 kDa		0.5	0.8	[]	unknown	5	8	4	0	0	0
940	TRUE	Empty	RecName: Full=Uncharacterized lipoprotein SAOUHSC_02650; Flags: Precursor	gi|122538777		23 kDa		0.4	0.8	[]	unknown	9	9	7	2	6	1
941	TRUE	Empty	tRNA dimethylallyltransferase [Staphylococcus aureus]	gi|486199565		36 kDa		0.5	INF	[]	unknown	0	3	1	2	0	0
942	TRUE	Empty	MULTISPECIES: ribonuclease 3 [Bacteria]	gi|445965382		28 kDa		0.5	0.8	[]	unknown	5	4	4	1	0	0
943	TRUE	Empty	hypothetical protein SAOUHSC_00925 [Staphylococcus aureus subsp. aureus NCTC 8325]	gi|88194682		40 kDa		1	INF	[]	unknown	0	0	0	0	1	0
944	TRUE	Empty	RecName: Full=DNA replication and repair protein RecF	gi|122540544		42 kDa		0.69	1	[]	unknown	2	4	2	2	0	0
945	TRUE	Empty	MULTISPECIES: hypothetical protein [Bacteria]	gi|446669341		24 kDa		0.5	1.3	[]	unknown	3	4	4	3	1	0
946	TRUE	Empty	MULTISPECIES: protein-tyrosine phosphatase [Bacteria]	gi|446150811		17 kDa		0.31	0.3	[]	unknown	3	0	1	2	1	0
947	TRUE	Empty	heptaprenyl diphosphate synthase subunit II [Staphylococcus aureus]	gi|447019215		36 kDa	TRUE	0.75	1	[]	unknown	1	2	1	0	0	0
948	TRUE	Empty	hypothetical protein SAOUHSC_02608 [Staphylococcus aureus subsp. aureus NCTC 8325]	gi|88196250		35 kDa		1	INF	[]	unknown	0	0	0	0	0	0
949	TRUE	Empty	RecName: Full=PTS system glucoside-specific EIICBA component; Includes: RecName: Full=Glucoside permease IIC component; AltName: Full=PTS system glucoside-specific EIIC component; Includes: RecName: Full=Glucoside-specific phosphotransferase enzyme IIB component; AltName: Full=PTS system glucoside-specific EIIB component; Includes: RecName: Full=Glucoside-specific phosphotransferase enzyme IIA co…	gi|122538643		74 kDa	TRUE	0.75	1	[]	unknown	1	3	1	0	0	0
950	TRUE	Empty	dihydrolipoamide dehydrogenase [Staphylococcus aureus subsp. aureus NCTC 8325]	gi|88195325		51 kDa		0.5	1.2	[]	unknown	5	9	6	1	0	0
951	TRUE	Empty	RecName: Full=Oxygen sensor histidine kinase NreB; AltName: Full=Nitrogen regulation protein B	gi|123098002		39 kDa		1	INF	[]	unknown	0	2	0	0	0	0
952	TRUE	Empty	hypothetical protein SAOUHSC_00679 [Staphylococcus aureus subsp. aureus NCTC 8325]	gi|88194444		33 kDa		0.66	1	[]	unknown	3	2	3	0	2	0
953	TRUE	Empty	sortase [Staphylococcus aureus subsp. aureus NCTC 8325]	gi|88196468		24 kDa		0.64	1	[]	unknown	4	3	4	3	2	0
954	TRUE	Empty	MULTISPECIES: 50S ribosomal protein L32 [Bacteria]	gi|446212617		6 kDa	TRUE	0.6	1	[]	unknown	7	8	7	6	6	3
955	TRUE	Empty	RecName: Full=Arginine repressor	gi|123003459		17 kDa		0.26	1.4	[]	unknown	9	12	13	8	5	1
956	TRUE	Empty	lactose phosphotransferase system repressor [Staphylococcus aureus subsp. aureus NCTC 8325]	gi|88196108		30 kDa	TRUE	0.5	2	[]	unknown	1	2	2	0	0	0
957	TRUE	Empty	RecName: Full=Urease accessory protein UreF	gi|122540651		26 kDa		0.5	0	[]	unknown	1	1	0	0	0	0
958	TRUE	Empty	RecName: Full=Uncharacterized hydrolase SAOUHSC_02465	gi|122538881		32 kDa		0.38	0.7	[]	unknown	6	3	4	0	0	0
959	TRUE	Empty	hypothetical protein [Staphylococcus aureus]	gi|446088204		31 kDa		0.3	0.7	[]	unknown	9	7	6	3	2	0
960	TRUE	Empty	MULTISPECIES: hypothetical protein [Bacteria]	gi|446570772		13 kDa		0.12	1.7	[]	unknown	10	19	17	4	1	0
961	TRUE	Empty	hypothetical protein SAOUHSC_01254 [Staphylococcus aureus subsp. aureus NCTC 8325]	gi|88194987		27 kDa		0.41	0.8	[]	unknown	11	13	9	10	2	0
962	TRUE	Empty	unknown, partial [Staphylococcus aureus subsp. aureus NCTC 8325]	gi|706920		12 kDa		1	INF	[]	unknown	0	0	0	1	0	1
963	TRUE	Empty	5-nucleotidase family protein [Staphylococcus aureus subsp. aureus NCTC 8325]	gi|88194617		50 kDa		0.5	0	[]	unknown	1	1	0	0	0	0
964	TRUE	Empty	hypothetical protein SAOUHSC_01470 [Staphylococcus aureus subsp. aureus NCTC 8325]	gi|88195187		27 kDa		0.36	0.6	[]	unknown	5	2	3	0	0	0
965	TRUE	Empty	RecName: Full=Phosphopantetheine adenylyltransferase; AltName: Full=Dephospho-CoA pyrophosphorylase; AltName: Full=Pantetheine-phosphate adenylyltransferase; Short=PPAT	gi|122539795		18 kDa		0.69	1	[]	unknown	2	0	2	1	1	0
966	TRUE	Empty	MULTISPECIES: formamidopyrimidine-DNA glycosylase [Bacteria]	gi|447037196		33 kDa		0.31	0.3	[]	unknown	3	3	1	1	0	0
967	TRUE	Empty	MULTISPECIES: peptide ABC transporter permease [Bacteria]	gi|446752376		40 kDa		1	INF	[]	unknown	0	1	0	0	0	0
968	TRUE	Empty	hypothetical protein [Staphylococcus aureus]	gi|446064181		20 kDa	TRUE	0.5	0.5	[]	unknown	2	2	1	0	0	0
969	TRUE	Empty	MULTISPECIES: DNA-binding protein [Bacteria]	gi|446650077		11 kDa		0.75	1	[]	unknown	1	2	1	0	0	0
970	TRUE	Empty	hypothetical protein SAOUHSC_00821 [Staphylococcus aureus subsp. aureus NCTC 8325]	gi|88194580		11 kDa		0.14	0.6	[]	unknown	14	10	8	5	2	0
971	TRUE	Empty	hypothetical protein SAOUHSC_02812 [Staphylococcus aureus subsp. aureus NCTC 8325]	gi|88196446		16 kDa		0.5	2	[]	unknown	1	3	2	2	2	0
972	TRUE	Empty	hypothetical protein SAOUHSC_02529 [Staphylococcus aureus subsp. aureus NCTC 8325]	gi|88196176		30 kDa	TRUE	0.5	1.2	[]	unknown	5	5	6	2	1	0
973	TRUE	Empty	RecName: Full=UPF0173 metal-dependent hydrolase SAOUHSC_01815	gi|122539311		25 kDa		0.3	1.5	[]	unknown	6	12	9	2	4	2
974	TRUE	Empty	hypothetical protein SAOUHSC_02579 [Staphylococcus aureus subsp. aureus NCTC 8325]	gi|88196222		42 kDa		0.5	2	[]	unknown	1	1	2	0	0	0
975	TRUE	Empty	RecName: Full=Dehydrosqualene synthase; AltName: Full=4,4'-diapophytoene synthase; Short=DAP synthase; AltName: Full=Diapophytoene synthase	gi|122538623		34 kDa		0.25	0	[]	unknown	2	2	0	0	0	0
976	TRUE	Empty	MULTISPECIES: diaminohydroxyphosphoribosylaminopyrimidine deaminase [Bacteria]	gi|445999489		39 kDa		0.11	5	[]	unknown	1	6	5	2	2	0
977	TRUE	Empty	RecName: Full=Ribonuclease HIII; Short=RNase HIII	gi|122539781		35 kDa		0.5	0.5	[]	unknown	2	1	1	1	0	0
978	TRUE	Empty	RecName: Full=Peptidyl-tRNA hydrolase; Short=PTH	gi|119391013		22 kDa		0.5	0.7	[]	unknown	3	5	2	0	0	0
979	TRUE	Empty	RecName: Full=Glutamate racemase	gi|122539773		30 kDa		0.5	0.9	[]	unknown	11	13	10	2	0	0
980	TRUE	Empty	RecName: Full=NADPH-dependent oxidoreductase	gi|112823994		29 kDa		0.6	1	[]	unknown	7	11	7	1	0	0
981	TRUE	Empty	hypothetical protein [Staphylococcus aureus]	gi|487718436		19 kDa	TRUE	0.66	1	[]	unknown	3	3	3	0	0	0
982	TRUE	Empty	butyryl-CoA dehydrogenase [Staphylococcus aureus]	gi|486201864		39 kDa		0.12	0	[]	unknown	3	3	0	0	0	0
983	TRUE	Empty	RecName: Full=O-acetyltransferase OatA	gi|122538619		69 kDa		0.69	1	[]	unknown	2	0	2	0	0	0
984	TRUE	Empty	hypothetical protein SAOUHSC_01694 [Staphylococcus aureus subsp. aureus NCTC 8325]	gi|88195400		28 kDa		0.5	0	[]	unknown	1	1	0	0	0	0
985	TRUE	Empty	MULTISPECIES: capsular polysaccharide biosynthesis protein Cap8F [Bacteria]	gi|446951037		42 kDa		0.25	0.5	[]	unknown	6	6	3	1	1	0
986	TRUE	Empty	Nif3-like dinuclear metal center hexameric protein [Staphylococcus aureus]	gi|446606585		41 kDa		0.5	1.2	[]	unknown	4	4	5	4	5	3
987	TRUE	Empty	hypothetical protein SAOUHSC_00638 [Staphylococcus aureus subsp. aureus NCTC 8325]	gi|88194405		25 kDa		0.5	1.1	[]	unknown	7	9	8	3	3	0
988	TRUE	Empty	ABC transporter substrate-binding protein [Staphylococcus aureus]	gi|446748265		30 kDa		0.062	0.2	[]	unknown	6	5	1	0	0	0
989	TRUE	Empty	MULTISPECIES: molybdopterin biosynthesis protein MoeB [Bacteria]	gi|445999074		38 kDa		0.5	0	[]	unknown	1	1	0	0	0	0
990	TRUE	Empty	RecName: Full=50S ribosomal protein L28	gi|122539716		7 kDa		1	INF	[]	unknown	0	0	0	0	0	0
991	TRUE	Empty	MULTISPECIES: hypothetical protein [Bacteria]	gi|446320817		4 kDa		< 0.00010	0.03	2.5mM Cu low, TSB high	unknown	40	6	1	2	0	0
992	TRUE	Empty	pyridine nucleotide-disulfide oxidoreductase [Staphylococcus aureus]	gi|446955762		45 kDa		0.5	INF	[]	unknown	0	0	1	0	0	0
993	TRUE	Empty	RecName: Full=Endoribonuclease YbeY	gi|122539405		18 kDa		0.14	0.3	[]	unknown	6	4	2	2	0	0
994	TRUE	Empty	hypothetical protein SAOUHSC_00877 [Staphylococcus aureus subsp. aureus NCTC 8325]	gi|88194634		12 kDa		0.6	1	[]	unknown	8	8	8	4	5	3
995	TRUE	Empty	hypothetical protein SAOUHSC_00302 [Staphylococcus aureus subsp. aureus NCTC 8325]	gi|88194103		45 kDa		1	INF	[]	unknown	0	1	0	0	0	0
996	TRUE	Empty	MULTISPECIES: ferric uptake regulation protein [Bacteria]	gi|447018004		16 kDa		0.39	0.7	[]	unknown	7	6	5	3	0	0
997	TRUE	Empty	hypothetical protein SAOUHSC_00890 [Staphylococcus aureus subsp. aureus NCTC 8325]	gi|88194647		15 kDa		0.25	0.5	[]	unknown	6	8	3	3	3	1
998	TRUE	Empty	RecName: Full=Protein FdhD homolog	gi|122538834		29 kDa		0.75	1	[]	unknown	1	3	1	0	0	0
999	TRUE	Empty	MULTISPECIES: single-stranded DNA-binding protein [Bacteria]	gi|446857543		19 kDa		0.23	1.7	[]	unknown	6	9	10	8	6	3
1000	TRUE	Empty	folylpolyglutamate synthase/dihydrofolate synthase [Staphylococcus aureus subsp. aureus NCTC 8325]	gi|88195467		48 kDa		0.5	0.8	[]	unknown	4	6	3	2	1	0
1001	TRUE	Empty	RecName: Full=4-hydroxy-tetrahydrodipicolinate synthase; Short=HTPA synthase	gi|14547963		33 kDa		0.21	1.5	[]	unknown	10	16	15	4	2	0
1002	TRUE	Empty	MULTISPECIES: RpiR family transcriptional regulator [Bacteria]	gi|446590036		30 kDa		0.5	2	[]	unknown	1	3	2	1	0	0
1003	TRUE	Empty	MULTISPECIES: RpiR family transcriptional regulator [Bacteria]	gi|446400137		30 kDa		0.75	1	[]	unknown	1	0	1	0	0	0
1004	TRUE	Empty	RecName: Full=Epimerase family protein SAOUHSC_00792	gi|122539971		34 kDa		0.39	0.8	[]	unknown	8	8	6	2	2	0
1005	TRUE	Empty	MULTISPECIES: monooxygenase IsdI [Bacteria]	gi|446402748		13 kDa		0.19	2	[]	unknown	4	7	8	1	0	0
1006	TRUE	Empty	16S ribosomal RNA methyltransferase RsmE [Staphylococcus aureus subsp. aureus NCTC 8325]	gi|88195386		28 kDa		0.5	1.1	[]	unknown	8	9	9	4	2	0
1007	TRUE	Empty	hydrolase alpha/beta fold domain-containing protein [Staphylococcus aureus subsp. aureus NCTC 8325]	gi|88195011		35 kDa		0.5	0	[]	unknown	1	0	0	0	0	0
1008	TRUE	Empty	UDP-N-acetylglucosamine 2-epimerase [Staphylococcus aureus subsp. aureus NCTC 8325]	gi|88193942		43 kDa		0.34	0.5	[]	unknown	4	2	2	0	0	0
1009	TRUE	Empty	MULTISPECIES: hypothetical protein [Bacteria]	gi|446143083		11 kDa		0.5	2	[]	unknown	1	2	2	0	1	2
1010	TRUE	Empty	sensor histidine kinase [Staphylococcus aureus subsp. aureus NCTC 8325]	gi|88195672		42 kDa	TRUE	1	INF	[]	unknown	0	1	0	0	0	0
1011	TRUE	Empty	tributyrin esterase [Staphylococcus aureus subsp. aureus NCTC 8325]	gi|88196584		29 kDa		0.5	0.5	[]	unknown	2	1	1	1	0	0
1012	TRUE	Empty	NUDIX domain-containing protein [Staphylococcus aureus subsp. aureus NCTC 8325]	gi|88195304		20 kDa		0.5	1.2	[]	unknown	5	6	6	5	5	1
1013	TRUE	Empty	MULTISPECIES: hypothetical protein [Bacteria]	gi|446748563		21 kDa		0.5	0.8	[]	unknown	6	8	5	6	7	0
1014	TRUE	Empty	RecName: Full=Peptide methionine sulfoxide reductase MsrA 1; Short=Protein-methionine-S-oxide reductase 1; AltName: Full=Peptide-methionine (S)-S-oxide reductase 1; Short=Peptide Met(O) reductase 1	gi|60392790		20 kDa		0.5	0.8	[]	unknown	4	4	3	2	0	0
1015	TRUE	Empty	hypothetical protein SAOUHSC_00706 [Staphylococcus aureus subsp. aureus NCTC 8325]	gi|88194471		28 kDa		0.5	0.8	[]	unknown	4	5	3	0	0	0
1016	TRUE	Empty	MULTISPECIES: hypothetical protein [Bacteria]	gi|447088107		12 kDa		0.3	0.7	[]	unknown	9	7	6	9	8	1
1017	TRUE	Empty	RecName: Full=Adapter protein MecA	gi|122540454		28 kDa		0.19	4	[]	unknown	1	3	4	1	0	1
1018	TRUE	Empty	MULTISPECIES: hypothetical protein [Bacteria]	gi|446578320		11 kDa		0.42	1.2	[]	unknown	12	10	14	7	5	0
1019	TRUE	Empty	signal peptidase IB [Staphylococcus aureus]	gi|446634140		22 kDa	TRUE	0.36	0.6	[]	unknown	5	6	3	3	0	0
1020	TRUE	Empty	sodium ABC transporter ATP-binding protein [Staphylococcus aureus]	gi|446446980		34 kDa	TRUE	0.5	INF	[]	unknown	0	1	1	0	0	0
1021	TRUE	Empty	MULTISPECIES: hypothetical protein [Bacteria]	gi|446332865		11 kDa		0.073	3	[]	unknown	3	5	9	6	5	2
1022	TRUE	Empty	hypothetical protein SAOUHSC_00301 [Staphylococcus aureus subsp. aureus NCTC 8325]	gi|88194102		31 kDa		0.61	1	[]	unknown	6	5	6	3	0	0
1023	TRUE	Empty	MULTISPECIES: RpiR family transcriptional regulator [Bacteria]	gi|445995340		33 kDa	TRUE	0.38	0.7	[]	unknown	6	9	4	2	0	0
1024	TRUE	Empty	MULTISPECIES: heat-shock protein Hsp20 [Bacteria]	gi|487709112		17 kDa	TRUE	0.4	1.3	[]	unknown	6	5	8	1	0	0
1025	TRUE	Empty	MULTISPECIES: biofilm operon icaADBC HTH-type negative transcriptional regulator IcaR [Bacteria]	gi|446575915		22 kDa		0.28	1.8	[]	unknown	4	7	7	3	2	0
1026	TRUE	Empty	RecName: Full=4-hydroxy-tetrahydrodipicolinate reductase; Short=HTPA reductase	gi|110282958		27 kDa	TRUE	0.66	1	[]	unknown	3	5	3	0	0	0
1027	TRUE	Empty	conserved hypothetical protein [Staphylococcus aureus subsp. aureus NCTC 8325]	gi|87203759		32 kDa		0.25	0.5	[]	unknown	6	4	3	0	0	0
1028	TRUE	Empty	hypothetical protein SAOUHSC_00410 [Staphylococcus aureus subsp. aureus NCTC 8325]	gi|88194204		45 kDa		0.69	1	[]	unknown	2	3	2	0	0	0
1029	TRUE	Empty	RecName: Full=Transcriptional regulator CtsR	gi|122540136		18 kDa		0.31	0.3	[]	unknown	3	2	1	0	0	0
1030	TRUE	Empty	RecName: Full=Conserved virulence factor C	gi|123098039		43 kDa		1	INF	[]	unknown	0	2	0	1	0	0
1031	TRUE	Empty	cytidine deaminase [Staphylococcus aureus subsp. aureus NCTC 8325]	gi|88195377		15 kDa		0.25	2	[]	unknown	3	4	6	6	3	0
1032	TRUE	Empty	hypothetical protein SAOUHSC_01706 [Staphylococcus aureus subsp. aureus NCTC 8325]	gi|88195412		48 kDa		0.5	0	[]	unknown	1	0	0	0	0	0
1033	TRUE	Empty	MULTISPECIES: hypothetical protein [Bacteria]	gi|446673861		33 kDa		0.75	1	[]	unknown	1	0	1	0	0	1
1034	TRUE	Empty	MULTISPECIES: gamma-hemolysin component A [Bacteria]	gi|446517173-DECOY		?	TRUE	1	INF	[]	unknown	0	0	0	2	0	1
1035	TRUE	Empty	hypothetical protein SAOUHSC_00690 [Staphylococcus aureus subsp. aureus NCTC 8325]	gi|88194455		27 kDa		0.19	0.2	[]	unknown	4	4	1	1	1	0
1036	TRUE	Empty	RecName: Full=Staphopain B; AltName: Full=Staphylococcal cysteine proteinase B; AltName: Full=Staphylopain B; Flags: Precursor	gi|112824002		45 kDa		0.5	2	[]	unknown	1	5	2	0	0	0
1037	TRUE	Empty	RecName: Full=30S ribosomal protein S21	gi|119367317		7 kDa		0.5	0.5	[]	unknown	2	3	1	0	1	0
1038	TRUE	Empty	ABC transporter ATP-binding protein [Staphylococcus aureus]	gi|446131710		32 kDa		0.69	1	[]	unknown	2	3	2	1	0	0
1039	TRUE	Empty	siderophore biosynthesis protein SbnF [Staphylococcus aureus]	gi|446999637		69 kDa		0.063	INF	[]	unknown	0	0	4	0	0	0
1040	TRUE	Empty	MULTISPECIES: allophanate hydrolase [Bacteria]	gi|446631346		27 kDa		0.5	1.2	[]	unknown	5	4	6	4	0	0
1041	TRUE	Empty	hypothetical protein SAOUHSC_02373 [Staphylococcus aureus subsp. aureus NCTC 8325]	gi|88196036		46 kDa		1	INF	[]	unknown	0	1	0	0	0	0
1042	TRUE	Empty	RecName: Full=Gamma-hemolysin component C; AltName: Full=Leukocidin s subunit; Flags: Precursor	gi|122538737		36 kDa	TRUE	0.75	1	[]	unknown	1	0	1	0	0	0
1043	TRUE	Empty	RecName: Full=UPF0348 protein SAOUHSC_01076	gi|122539794		43 kDa		0.31	3	[]	unknown	1	2	3	1	0	0
1044	TRUE	Empty	RecName: Full=D-aminoacyl-tRNA deacylase; AltName: Full=D-tyrosyl-tRNA(Tyr) deacylase	gi|146325658		17 kDa		0.5	1.2	[]	unknown	5	6	6	3	3	0
1045	TRUE	Empty	RecName: Full=Probable cell wall amidase LytH; Flags: Precursor	gi|110279036		33 kDa		0.5	0.5	[]	unknown	2	1	1	0	0	0
1046	TRUE	Empty	hypothetical protein SAOUHSC_01468 [Staphylococcus aureus subsp. aureus NCTC 8325]	gi|88195185		14 kDa		0.34	2	[]	unknown	2	2	4	0	1	0
1047	TRUE	Empty	MULTISPECIES: hypothetical protein [Bacteria]	gi|447171683		36 kDa		0.5	0.9	[]	unknown	7	9	6	4	0	0
1048	TRUE	Empty	Holliday junction-specific endonuclease [Staphylococcus aureus subsp. aureus NCTC 8325]	gi|88195183		26 kDa	TRUE	1	INF	[]	unknown	0	1	0	0	0	0
1049	TRUE	Empty	RecName: Full=ATP synthase subunit b; AltName: Full=ATP synthase F(0) sector subunit b; AltName: Full=ATPase subunit I; AltName: Full=F-type ATPase subunit b; Short=F-ATPase subunit b	gi|122540612		20 kDa		0.5	0.9	[]	unknown	7	6	6	4	2	0
1050	TRUE	Empty	hypothetical protein SAOUHSC_02568 [Staphylococcus aureus subsp. aureus NCTC 8325]	gi|88196212		13 kDa		0.19	0.2	[]	unknown	4	2	1	0	2	2
1051	TRUE	Empty	RecName: Full=Teichoic acids export ATP-binding protein TagH	gi|123291878		30 kDa		0.5	0.8	[]	unknown	5	5	4	2	1	0
1052	TRUE	Empty	hypothetical protein SAOUHSC_01832 [Staphylococcus aureus subsp. aureus NCTC 8325]	gi|88195532		43 kDa		0.23	1.7	[]	unknown	6	7	10	1	0	0
1053	TRUE	Empty	aldose 1-epimerase [Staphylococcus aureus subsp. aureus NCTC 8325]	gi|88196256		39 kDa		0.5	0.7	[]	unknown	3	0	2	0	2	0
1054	TRUE	Empty	RecName: Full=Nuclease SbcCD subunit D	gi|122539624		43 kDa		0.75	1	[]	unknown	1	2	1	1	0	0
1055	TRUE	Empty	arginase [Staphylococcus aureus subsp. aureus NCTC 8325]	gi|3892892 (+1)		33 kDa		0.34	0.5	[]	unknown	4	2	2	0	0	0
1056	TRUE	Empty	hypothetical protein SAOUHSC_01830 [Staphylococcus aureus subsp. aureus NCTC 8325]	gi|88195530		28 kDa		0.5	2	[]	unknown	1	3	2	0	0	0
1057	TRUE	Empty	RecName: Full=LexA repressor	gi|123291804		23 kDa		0.69	1	[]	unknown	2	4	2	1	1	0
1058	TRUE	Empty	MULTISPECIES: hypothetical protein [Bacteria]	gi|446918031		16 kDa		0.6	1	[]	unknown	7	7	7	6	8	2
1059	TRUE	Empty	MULTISPECIES: hypothetical protein [Bacteria]	gi|446788368		25 kDa		0.75	1	[]	unknown	1	2	1	0	0	0
1060	TRUE	Empty	MULTISPECIES: hypothetical protein [Bacteria]	gi|446704633		12 kDa		0.29	1.6	[]	unknown	5	10	8	5	4	1
1061	TRUE	Empty	RecName: Full=HTH-type transcriptional regulator SarX; AltName: Full=Staphylococcal accessory regulator X	gi|118597364		14 kDa	TRUE	0.59	1	[]	unknown	9	10	9	0	0	0
1062	TRUE	Empty	hypothetical protein SAOUHSC_00057 [Staphylococcus aureus subsp. aureus NCTC 8325]	gi|88193877		43 kDa		0.39	0.7	[]	unknown	7	6	5	0	1	0
1063	TRUE	Empty	MULTISPECIES: acyl-CoA hydrolase [Bacteria]	gi|446106528		20 kDa		0.5	1.3	[]	unknown	3	3	4	0	0	0
1064	TRUE	Empty	RecName: Full=Protein-arginine kinase activator protein	gi|857215852		22 kDa		0.25	0	[]	unknown	2	1	0	2	1	0
1065	TRUE	Empty	MULTISPECIES: molybdenum cofactor biosynthesis protein B [Bacteria]	gi|446425965		19 kDa		0.3	1.5	[]	unknown	6	5	9	4	3	0
1066	TRUE	Empty	conserved hypothetical protein [Staphylococcus aureus subsp. aureus NCTC 8325]	gi|87201637		26 kDa	TRUE	0.5	0.7	[]	unknown	3	2	2	2	1	1
1067	TRUE	Empty	RecName: Full=UPF0413 protein SAOUHSC_00938	gi|123003517		31 kDa		0.13	INF	[]	unknown	0	3	3	1	0	0
1068	TRUE	Empty	RecName: Full=HTH-type transcriptional regulator SarZ; AltName: Full=Staphylococcal accessory regulator Z	gi|123003423		17 kDa		0.6	1	[]	unknown	7	9	7	1	1	0
1069	TRUE	Empty	hypothetical protein SAOUHSC_00695 [Staphylococcus aureus subsp. aureus NCTC 8325]	gi|88194460		35 kDa		0.34	2	[]	unknown	2	5	4	0	0	0
1070	TRUE	Empty	MULTISPECIES: hypothetical protein [Bacteria]	gi|447009488		25 kDa		0.25	2	[]	unknown	3	7	6	1	1	0
1071	TRUE	Empty	MULTISPECIES: thioredoxin [Bacteria]	gi|446988545		11 kDa		0.5	0.9	[]	unknown	7	6	6	5	0	0
1072	TRUE	Empty	ribosomal protein L11 methyltransferase [Staphylococcus aureus]	gi|447027355		36 kDa		0.31	0.3	[]	unknown	3	3	1	0	0	0
1073	TRUE	Empty	hypothetical protein SAOUHSC_00605 [Staphylococcus aureus subsp. aureus NCTC 8325]	gi|88194375		18 kDa		0.69	1	[]	unknown	2	4	2	0	0	0
1074	TRUE	Empty	DNA polymerase III subunit delta' [Staphylococcus aureus]	gi|446266482		36 kDa	TRUE	0.66	1	[]	unknown	3	2	3	0	0	0
1075	TRUE	Empty	hypothetical protein SAOUHSC_01761 [Staphylococcus aureus subsp. aureus NCTC 8325]	gi|88195462		18 kDa		0.25	0	[]	unknown	2	3	0	0	0	0
1076	TRUE	Empty	MULTISPECIES: carboxylesterase [Bacteria]	gi|447143557		27 kDa		0.69	1	[]	unknown	2	1	2	0	0	0
1077	TRUE	Empty	hypothetical protein SAOUHSC_00717 [Staphylococcus aureus subsp. aureus NCTC 8325]	gi|88194482		16 kDa		0.0064	0.2	[]	unknown	12	8	2	4	0	0
1078	TRUE	Empty	hydrolase in agr operon [Staphylococcus aureus]	gi|446790704		30 kDa		0.34	2	[]	unknown	2	2	4	1	3	1
1079	TRUE	Empty	RecName: Full=NAD-dependent protein deacetylase; AltName: Full=Regulatory protein SIR2 homolog	gi|38257817		27 kDa	TRUE	0.5	0	[]	unknown	1	1	0	0	0	0
1080	TRUE	Empty	RecName: Full=Ribonuclease Z; Short=RNase Z; AltName: Full=tRNA 3 endonuclease; AltName: Full=tRNase Z	gi|122539452		35 kDa		0.5	1.5	[]	unknown	2	3	3	4	1	0
1081	TRUE	Empty	MULTISPECIES: phosphoglycerate mutase [Bacteria]	gi|447063437		22 kDa		0.34	0.5	[]	unknown	4	4	2	0	0	0
1082	TRUE	Empty	ATP-dependent DNA helicase RecQ [Staphylococcus aureus subsp. aureus NCTC 8325]	gi|88195218		53 kDa		1	INF	[]	unknown	0	1	0	0	0	0
1083	TRUE	Empty	deoxyribose-phosphate aldolase 1 [Staphylococcus aureus]	gi|446589923		23 kDa	TRUE	0.069	0.7	[]	unknown	60	35	44	24	20	10
1084	TRUE	Empty	MULTISPECIES: urease accessory protein UreE [Bacteria]	gi|446557243		17 kDa		0.39	0.7	[]	unknown	7	7	5	1	2	0
1085	TRUE	Empty	RecName: Full=1-phosphatidylinositol phosphodiesterase; AltName: Full=Phosphatidylinositol diacylglycerol-lyase; AltName: Full=Phosphatidylinositol-specific phospholipase C; Short=PI-PLC; Flags: Precursor	gi|122540421		37 kDa		1	INF	[]	unknown	0	1	0	0	0	0
1086	TRUE	Empty	MULTISPECIES: hypothetical protein [Bacteria]	gi|446530783		33 kDa		0.5	INF	[]	unknown	0	1	1	1	0	0
1087	TRUE	Empty	MULTISPECIES: membrane protein [Bacteria]	gi|446383128		40 kDa		1	INF	[]	unknown	0	0	0	1	0	0
1088	TRUE	Empty	tRNA (guanine-N(7)-)-methyltransferase [Staphylococcus aureus subsp. aureus NCTC 8325]	gi|88195562		25 kDa		0.64	1	[]	unknown	4	3	4	1	0	0
1089	TRUE	Empty	MULTISPECIES: alpha/beta hydrolase [Bacteria]	gi|446285112		31 kDa		0.5	0.9	[]	unknown	9	9	8	2	2	0
1090	TRUE	Empty	hypothetical protein SAOUHSC_01661 [Staphylococcus aureus subsp. aureus NCTC 8325]	gi|88195368		26 kDa		0.62	1	[]	unknown	5	4	5	6	5	0
1091	TRUE	Empty	MULTISPECIES: TetR family transcriptional regulator [Bacteria]	gi|446587892		22 kDa		1	INF	[]	unknown	0	2	0	0	1	0
1092	TRUE	Empty	MULTISPECIES: thermonuclease [Bacteria]	gi|446764095		20 kDa		1	INF	[]	unknown	0	0	0	0	0	0
1093	TRUE	Empty	hypothetical protein SAOUHSC_01958 [Staphylococcus aureus subsp. aureus NCTC 8325]	gi|88195651		21 kDa		0.5	0.8	[]	unknown	5	2	4	1	2	0
1094	TRUE	Empty	hypothetical protein SAOUHSC_02584 [Staphylococcus aureus subsp. aureus NCTC 8325]	gi|88196227		30 kDa		0.5	2	[]	unknown	1	2	2	1	0	0
1095	TRUE	Empty	dihydrolipoamide dehydrogenase [Staphylococcus aureus subsp. aureus NCTC 8325]	gi|88195325-DECOY		?		0.5	0	[]	unknown	1	0	0	0	0	0
1096	TRUE	Empty	MULTISPECIES: 50S ribosomal protein L7ae [Bacteria]	gi|445942998		12 kDa		0.34	2	[]	unknown	2	2	4	3	0	0
1097	TRUE	Empty	competence protein ComK [Staphylococcus aureus]	gi|446209416		23 kDa	TRUE	0.25	0	[]	unknown	2	2	0	0	0	0
1098	TRUE	Empty	MULTISPECIES: hypothetical protein [Bacteria]	gi|446649982		13 kDa		0.5	0	[]	unknown	1	1	0	0	0	0
1099	TRUE	Empty	MULTISPECIES: hypothetical protein [Bacteria]	gi|447088121		11 kDa		0.36	0.6	[]	unknown	5	7	3	2	2	0
1100	TRUE	Empty	glycerol 3-phosphate cytidyltransferase [Staphylococcus aureus subsp. aureus NCTC 8325]	gi|1262138		16 kDa	TRUE	0.5	0	[]	unknown	1	0	0	0	0	0
1101	TRUE	Empty	hypothetical protein [Staphylococcus aureus]	gi|446129990		17 kDa		0.69	1	[]	unknown	2	4	2	0	0	0
1102	TRUE	Empty	RecName: Full=Segregation and condensation protein B	gi|122539459		20 kDa		0.5	0.7	[]	unknown	3	4	2	3	1	0
1103	TRUE	Empty	MULTISPECIES: hypothetical protein [Bacteria]	gi|446675563		7 kDa	TRUE	0.25	0.5	[]	unknown	6	4	3	1	1	1
1104	TRUE	Empty	MULTISPECIES: segregation and condensation protein A [Bacteria]	gi|446195516		29 kDa		0.75	1	[]	unknown	1	2	1	0	0	0
1105	TRUE	Empty	acetyl-CoA carboxylase biotin carboxylase [Staphylococcus aureus subsp. aureus NCTC 8325]	gi|88195415		50 kDa		1	INF	[]	unknown	0	1	0	0	0	0
1106	TRUE	Empty	MULTISPECIES: transcriptional regulator [Bacteria]	gi|446576684		37 kDa		0.25	0	[]	unknown	2	2	0	0	0	0
1107	TRUE	Empty	MULTISPECIES: hypothetical protein [Bacteria]	gi|446061077		11 kDa		0.5	0	[]	unknown	1	0	0	0	0	0
1108	TRUE	Empty	MULTISPECIES: hypothetical protein [Bacteria]	gi|446137035		31 kDa		0.69	1	[]	unknown	2	3	2	0	0	0
1109	TRUE	Empty	RecName: Full=50S ribosomal protein L36	gi|122538865		4 kDa		0.29	0.6	[]	unknown	8	7	5	3	1	0
1110	TRUE	Empty	RecName: Full=Ribosome maturation factor RimP	gi|122540592		18 kDa		0.25	0.5	[]	unknown	6	3	3	4	1	0
1111	TRUE	Empty	RecName: Full=Transcriptional regulator MraZ	gi|122539745		17 kDa		0.69	1	[]	unknown	2	1	2	0	0	0
1112	TRUE	Empty	RecName: Full=HTH-type transcriptional regulator rot; AltName: Full=Repressor of toxins	gi|110825743		19 kDa		0.69	1	[]	unknown	2	2	2	2	2	2
1113	TRUE	Empty	fructose specific permease [Staphylococcus aureus subsp. aureus NCTC 8325]	gi|88194473		69 kDa		0.23	0.4	[]	unknown	5	4	2	0	0	0
1114	TRUE	Empty	conserved hypothetical protein [Staphylococcus aureus subsp. aureus NCTC 8325]	gi|87202698		13 kDa	TRUE	0.27	0.6	[]	unknown	7	7	4	3	1	2
1115	TRUE	Empty	MULTISPECIES: nicotinate-nucleotide adenylyltransferase [Bacteria]	gi|446647816		22 kDa		0.5	INF	[]	unknown	0	1	1	0	0	0
1116	TRUE	Empty	hypothetical protein SAOUHSC_01650 [Staphylococcus aureus subsp. aureus NCTC 8325]	gi|88195358		21 kDa		0.5	INF	[]	unknown	0	0	1	0	0	0
1117	TRUE	Empty	cardiolipin synthase [Staphylococcus aureus]	gi|446493695		57 kDa	TRUE	1	INF	[]	unknown	0	1	0	0	0	0
1118	TRUE	Empty	MULTISPECIES: exodeoxyribonuclease 7 small subunit [Bacteria]	gi|446082010		9 kDa		0.34	0.5	[]	unknown	4	2	2	2	1	0
1119	TRUE	Empty	MULTISPECIES: arginine ABC transporter ATP-binding protein [Bacteria]	gi|446538115		27 kDa		0.5	1.2	[]	unknown	5	3	6	0	0	0
1120	TRUE	Empty	hypothetical protein SAOUHSC_01188 [Staphylococcus aureus subsp. aureus NCTC 8325]	gi|161353527		34 kDa	TRUE	0.36	0.6	[]	unknown	5	3	3	0	0	0
1121	TRUE	Empty	hypothetical protein SAOUHSC_00367 [Staphylococcus aureus subsp. aureus NCTC 8325]	gi|88194165		49 kDa		0.69	1	[]	unknown	2	5	2	0	0	0
1122	TRUE	Empty	MULTISPECIES: deoxycytidylate deaminase [Bacteria]	gi|446361838		17 kDa		0.5	0.7	[]	unknown	3	3	2	2	0	0
1123	TRUE	Empty	hypothetical protein SAOUHSC_00269 [Staphylococcus aureus subsp. aureus NCTC 8325]	gi|88194074		20 kDa	TRUE	0.24	0.6	[]	unknown	11	8	7	4	1	1
1124	TRUE	Empty	RecName: Full=Putative lipid kinase SAOUHSC_00736	gi|122540011		34 kDa		0.4	1.3	[]	unknown	7	8	9	2	2	0
1125	TRUE	Empty	RecName: Full=UPF0754 membrane protein SAOUHSC_01978	gi|122539211		43 kDa		1	INF	[]	unknown	0	2	0	0	0	0
1126	TRUE	Empty	hypothetical protein SAOUHSC_00306 [Staphylococcus aureus subsp. aureus NCTC 8325]	gi|88194107		30 kDa		0.5	INF	[]	unknown	0	0	1	0	0	0
1127	TRUE	Empty	hypothetical protein SAOUHSC_00806 [Staphylococcus aureus subsp. aureus NCTC 8325]	gi|88194566		13 kDa		0.5	1.1	[]	unknown	8	8	9	1	4	0
1128	TRUE	Empty	MULTISPECIES: iron transporter [Bacteria]	gi|446032748		27 kDa		0.5	INF	[]	unknown	0	0	1	0	0	0
1129	TRUE	Empty	hypothetical protein SAOUHSC_01180 [Staphylococcus aureus subsp. aureus NCTC 8325]	gi|88194919		36 kDa		1	INF	[]	unknown	0	1	0	0	0	0
1130	TRUE	Empty	RecName: Full=Response regulator protein GraR; AltName: Full=Glycopeptide resistance-associated protein R	gi|122540052		26 kDa		0.5	0.5	[]	unknown	2	4	1	1	0	0
1131	TRUE	Empty	RecName: Full=Transcriptional repressor NrdR	gi|119372233		18 kDa		1	INF	[]	unknown	0	0	0	0	0	0
1132	TRUE	Empty	MULTISPECIES: hypothetical protein [Bacteria]	gi|446306316		9 kDa		0.5	2	[]	unknown	1	2	2	0	0	0
1133	TRUE	Empty	MULTISPECIES: glyceraldehyde-3-phosphate dehydrogenase [Bacteria]	gi|446028286		37 kDa	TRUE	0.11	0.2	[]	unknown	5	1	1	0	0	0
1134	TRUE	Empty	hypothetical protein SAOUHSC_00696 [Staphylococcus aureus subsp. aureus NCTC 8325]	gi|88194461		35 kDa		0.75	1	[]	unknown	1	0	1	2	1	0
1135	TRUE	Empty	MULTISPECIES: permease [Bacteria]	gi|446081895		51 kDa		0.5	0	[]	unknown	1	0	0	0	0	0
1136	TRUE	Empty	MULTISPECIES: LysR family transcriptional regulator [Bacteria]	gi|446273906		33 kDa		0.5	1.3	[]	unknown	3	0	4	1	0	0
1137	TRUE	Empty	hypothetical protein [Staphylococcus aureus]	gi|445959220		46 kDa		0.61	1	[]	unknown	6	6	6	1	1	0
1138	TRUE	Empty	hypothetical protein SAOUHSC_02631 [Staphylococcus aureus subsp. aureus NCTC 8325]	gi|88196272		22 kDa		0.062	0.2	[]	unknown	6	4	1	1	1	0
1139	TRUE	Empty	MULTISPECIES: hypothetical protein [Bacteria]	gi|446173398		22 kDa		0.69	1	[]	unknown	2	0	2	1	1	0
1140	TRUE	Empty	MULTISPECIES: acetyltransferase [Bacteria]	gi|447090572		20 kDa		0.64	1	[]	unknown	4	4	4	0	2	0
1141	TRUE	Empty	MULTISPECIES: N-acetylmannosaminyltransferase [Bacteria]	gi|446137533		29 kDa		0.5	2	[]	unknown	1	1	2	1	1	0
1142	TRUE	Empty	MULTISPECIES: MarR family transcriptional regulator [Bacteria]	gi|446028330		18 kDa		0.34	2	[]	unknown	2	3	4	0	0	0
1143	TRUE	Empty	hypothetical protein SAOUHSC_02912 [Staphylococcus aureus subsp. aureus NCTC 8325]	gi|88196540		17 kDa		0.69	1	[]	unknown	2	0	2	0	0	0
1144	TRUE	Empty	MULTISPECIES: rhodanese [Bacteria]	gi|447199315		15 kDa		0.5	2	[]	unknown	1	3	2	1	1	0
1145	TRUE	Empty	RecName: Full=Type II pantothenate kinase; AltName: Full=PanK-II; AltName: Full=Pantothenic acid kinase	gi|118572233		29 kDa		0.66	1	[]	unknown	3	3	3	2	2	0
1146	TRUE	Empty	RecName: Full=Acyl carrier protein; Short=ACP	gi|123003476		9 kDa		0.5	0.9	[]	unknown	14	10	13	0	1	0
1147	TRUE	Empty	MULTISPECIES: ABC transporter ATP-binding protein [Bacteria]	gi|446846504		28 kDa		1	INF	[]	unknown	0	1	0	0	0	0
1148	TRUE	Empty	monofunctional glycosyltransferase [Staphylococcus aureus]	gi|446753124		31 kDa		0.75	1	[]	unknown	1	2	1	0	0	0
1149	TRUE	Empty	MULTISPECIES: iron-dicitrate ABC transporter ATP-binding protein [Bacteria]	gi|447003553		29 kDa		0.11	5	[]	unknown	1	1	5	0	0	0
1150	TRUE	Empty	hypothetical protein SAOUHSC_02553 [Staphylococcus aureus subsp. aureus NCTC 8325]	gi|88196198		35 kDa		0.25	0.5	[]	unknown	6	4	3	2	1	0
1151	TRUE	Empty	RecName: Full=tRNA N6-adenosine threonylcarbamoyltransferase; AltName: Full=N6-L-threonylcarbamoyladenine synthase; Short=t(6)A synthase; AltName: Full=t(6)A37 threonylcarbamoyladenosine biosynthesis protein TsaD; AltName: Full=tRNA threonylcarbamoyladenosine biosynthesis protein TsaD	gi|122539005		37 kDa		0.66	1	[]	unknown	3	6	3	2	0	0
1152	TRUE	Empty	hypothetical protein SAOUHSC_02694 [Staphylococcus aureus subsp. aureus NCTC 8325]	gi|88196334		23 kDa		1	INF	[]	unknown	0	1	0	0	0	0
1153	TRUE	Empty	pyrophosphohydrolase [Staphylococcus aureus subsp. aureus NCTC 8325]	gi|88196427		15 kDa		0.36	0.6	[]	unknown	5	6	3	3	3	0
1154	TRUE	Empty	hypothetical protein SAOUHSC_02096 [Staphylococcus aureus subsp. aureus NCTC 8325]	gi|88195778		10 kDa		0.5	0	[]	unknown	1	2	0	0	0	0
1155	TRUE	Empty	RecName: Full=Urease accessory protein UreG	gi|122540543		22 kDa		0.059	0.4	[]	unknown	11	7	4	1	0	0
1156	TRUE	Empty	MULTISPECIES: O-methyltransferase [Bacteria]	gi|446264411		25 kDa		0.75	1	[]	unknown	1	0	1	0	0	0
1157	TRUE	Empty	50S rRNA methyltransferase [Staphylococcus aureus]	gi|446627430		18 kDa	TRUE	0.75	1	[]	unknown	1	0	1	1	0	0
1158	TRUE	Empty	hypothetical protein SAOUHSC_00784 [Staphylococcus aureus subsp. aureus NCTC 8325]	gi|88194545		57 kDa		0.25	0	[]	unknown	2	0	0	0	0	0
1159	TRUE	Empty	RecName: Full=Putative Holliday junction resolvase	gi|146325610		16 kDa		0.62	1	[]	unknown	5	8	5	2	0	0
1160	TRUE	Empty	MULTISPECIES: dihydroneopterin aldolase [Bacteria]	gi|447077046		14 kDa		0.5	INF	[]	unknown	0	1	1	0	0	0
1161	TRUE	Empty	bifunctional biotin--[acetyl-CoA-carboxylase] synthetase/biotin operon repressor [Staphylococcus aureus]	gi|445972056		37 kDa		0.69	1	[]	unknown	2	3	2	0	0	0
1162	TRUE	Empty	MULTISPECIES: potassium transporter Trk [Bacteria]	gi|446436435		24 kDa		0.34	2	[]	unknown	2	2	4	0	0	0
1163	TRUE	Empty	TetR family transcriptional regulator [Staphylococcus aureus]	gi|446824250		22 kDa	TRUE	0.062	0	[]	unknown	4	1	0	1	0	0
1164	TRUE	Empty	hypothetical protein SAOUHSC_02149 [Staphylococcus aureus subsp. aureus NCTC 8325]	gi|88195829		21 kDa		0.5	0	[]	unknown	1	0	0	0	0	0
1165	TRUE	Empty	hypothetical protein SAOUHSC_01314 [Staphylococcus aureus subsp. aureus NCTC 8325]	gi|88195044		23 kDa		0.75	1	[]	unknown	1	0	1	0	0	0
1166	TRUE	Empty	RecName: Full=Holliday junction ATP-dependent DNA helicase RuvA	gi|123098028		22 kDa		0.5	1.2	[]	unknown	4	5	5	4	3	0
1167	TRUE	Empty	hypothetical protein SAOUHSC_02406 [Staphylococcus aureus subsp. aureus NCTC 8325]	gi|88196067		35 kDa		0.11	0.2	[]	unknown	5	1	1	0	0	0
1168	TRUE	Empty	RecName: Full=Lysostaphin resistance protein A	gi|122538799		47 kDa		1	INF	[]	unknown	0	0	0	0	1	0
1169	TRUE	Empty	1-acyl-sn-glycerol-3-phosphate acyltransferase domain-containing protein [Staphylococcus aureus subsp. aureus NCTC 8325]	gi|88195537		23 kDa		0.062	0	[]	unknown	4	5	0	0	0	0
1170	TRUE	Empty	hypothetical protein SAOUHSC_02898 [Staphylococcus aureus subsp. aureus NCTC 8325]	gi|88196526		25 kDa		0.25	INF	[]	unknown	0	4	2	0	0	0
1171	TRUE	Empty	methylated-DNA--protein-cysteine methyltransferase [Staphylococcus aureus subsp. aureus NCTC 8325]	gi|88196492		19 kDa		0.31	0.3	[]	unknown	3	2	1	0	0	0
1172	TRUE	Empty	RecName: Full=D-alanine--poly(phosphoribitol) ligase subunit 2; AltName: Full=D-alanyl carrier protein; Short=DCP	gi|123098054		9 kDa		0.41	1.2	[]	unknown	8	12	10	5	6	6
1173	TRUE	Empty	alkaline phosphatase synthesis transcriptional regulatory protein [Staphylococcus aureus subsp. aureus NCTC 8325]	gi|88195500		27 kDa		0.5	0.8	[]	unknown	5	2	4	1	0	0
1174	TRUE	Empty	hypothetical protein SAOUHSC_00940 [Staphylococcus aureus subsp. aureus NCTC 8325]	gi|88194697		23 kDa		0.5	1.2	[]	unknown	6	5	7	1	1	0
1175	TRUE	Empty	hypothetical protein SAOUHSC_00565 [Staphylococcus aureus subsp. aureus NCTC 8325]	gi|88194343		14 kDa		0.66	1	[]	unknown	3	3	3	3	2	0
1176	TRUE	Empty	hypothetical protein SAOUHSC_00060 [Staphylococcus aureus subsp. aureus NCTC 8325]	gi|88193879		61 kDa		0.5	0	[]	unknown	1	0	0	0	0	0
1177	TRUE	Empty	hypothetical protein SAOUHSC_02372 [Staphylococcus aureus subsp. aureus NCTC 8325]	gi|88196035		26 kDa		0.5	INF	[]	unknown	0	1	1	0	0	0
1178	TRUE	Empty	ribosomal-protein-serine acetyltransferase [Staphylococcus aureus]	gi|446389797		21 kDa		0.5	0	[]	unknown	1	0	0	0	1	0
1179	TRUE	Empty	hypothetical protein SAOUHSC_01317 [Staphylococcus aureus subsp. aureus NCTC 8325]	gi|88195047		33 kDa		0.5	0.8	[]	unknown	4	2	3	1	0	0
1180	TRUE	Empty	DNA methyltransferase [Staphylococcus aureus]	gi|446312720		11 kDa		0.39	0.8	[]	unknown	8	10	6	5	5	1
1181	TRUE	Empty	haloacid dehalogenase [Staphylococcus aureus]	gi|446644361		43 kDa		0.75	1	[]	unknown	1	1	1	0	0	0
1182	TRUE	Empty	MULTISPECIES: ATP synthase epsilon chain [Bacteria]	gi|447017138		15 kDa		0.5	0.8	[]	unknown	4	4	3	2	0	0
1183	TRUE	Empty	MULTISPECIES: carbohydrate kinase [Bacteria]	gi|446371363		30 kDa	TRUE	1	INF	[]	unknown	0	1	0	0	0	0
1184	TRUE	Empty	hypothetical protein SAOUHSC_00107 [Staphylococcus aureus subsp. aureus NCTC 8325]	gi|88193920		58 kDa		0.31	0.3	[]	unknown	3	0	1	0	0	0
1185	TRUE	Empty	MULTISPECIES: addiction module antitoxin RelB [Bacteria]	gi|446035407		10 kDa		1	INF	[]	unknown	0	1	0	0	0	0
1186	TRUE	Empty	RecName: Full=Sensory transduction protein LytR	gi|45477027		28 kDa		1	INF	[]	unknown	0	0	0	0	0	0
1187	TRUE	Empty	hypothetical protein SAOUHSC_01358 [Staphylococcus aureus subsp. aureus NCTC 8325]	gi|88195085		45 kDa		1	INF	[]	unknown	0	1	0	0	0	0
1188	TRUE	Empty	isoprenyl transferase [Staphylococcus aureus]	gi|446395850		30 kDa		1	INF	[]	unknown	0	1	0	0	0	0
1189	TRUE	Empty	ribokinase [Staphylococcus aureus subsp. aureus NCTC 8325]	gi|88194046		32 kDa		0.39	0.8	[]	unknown	8	8	6	2	0	0
1190	TRUE	Empty	sodium:alanine symporter family protein [Staphylococcus aureus subsp. aureus NCTC 8325]	gi|88195082		52 kDa		1	INF	[]	unknown	0	0	0	0	0	0
1191	TRUE	Empty	hypothetical protein SAOUHSC_01596 [Staphylococcus aureus subsp. aureus NCTC 8325]	gi|88195307		28 kDa		0.75	1	[]	unknown	1	1	1	0	0	0
1192	TRUE	Empty	RecName: Full=3-dehydroquinate dehydratase; Short=3-dehydroquinase; AltName: Full=Type I DHQase; AltName: Full=Type I dehydroquinase; Short=DHQ1	gi|123003487		27 kDa		0.66	1	[]	unknown	3	3	3	0	1	0
1193	TRUE	Empty	lytic regulatory protein [Staphylococcus aureus subsp. aureus NCTC 8325]	gi|88196053		41 kDa		0.5	0	[]	unknown	1	2	0	0	1	0
1194	TRUE	Empty	RecName: Full=3-dehydroquinate synthase	gi|122539541		40 kDa		0.19	0.2	[]	unknown	4	1	1	0	0	0
1195	TRUE	Empty	capsular polysaccharide biosynthesis protein Cap8C [Staphylococcus aureus subsp. aureus NCTC 8325]	gi|88193929		29 kDa		0.25	0.5	[]	unknown	6	5	3	0	0	0
1196	TRUE	Empty	RecName: Full=7-cyano-7-deazaguanine synthase; AltName: Full=7-cyano-7-carbaguanine synthase; AltName: Full=PreQ(0) synthase; AltName: Full=Queuosine biosynthesis protein QueC	gi|110816264		25 kDa		0.75	1	[]	unknown	1	2	1	0	0	0
1197	TRUE	Empty	hypothetical protein SAOUHSC_02659 [Staphylococcus aureus subsp. aureus NCTC 8325]	gi|88196299		24 kDa		0.25	0	[]	unknown	2	0	0	0	0	0
1198	TRUE	Empty	MULTISPECIES: capsular polysaccharide biosynthesis protein Cap8M [Bacteria]	gi|446747842		21 kDa		0.5	0.5	[]	unknown	2	2	1	0	0	0
1199	TRUE	Empty	MULTISPECIES: methyltransferase [Bacteria]	gi|447186540		20 kDa		0.5	1.5	[]	unknown	2	5	3	1	0	0
1200	TRUE	Empty	MULTISPECIES: hypothetical protein [Bacteria]	gi|446660340		21 kDa		0.31	3	[]	unknown	1	1	3	1	1	0
1201	TRUE	Empty	MULTISPECIES: hypothetical protein [Bacteria]	gi|446050801		16 kDa		0.5	1.2	[]	unknown	6	5	7	3	2	0
1202	TRUE	Empty	hypothetical protein SAOUHSC_00421 [Staphylococcus aureus subsp. aureus NCTC 8325]	gi|88194214		33 kDa		0.31	3	[]	unknown	1	2	3	0	0	0
1203	TRUE	Empty	RecName: Full=Protein NrdI	gi|110815876		15 kDa		0.5	0.5	[]	unknown	2	2	1	0	0	0
1204	TRUE	Empty	MULTISPECIES: AraC family transcriptional regulator [Bacteria]	gi|446399666		30 kDa		0.25	0	[]	unknown	2	4	0	0	0	0
1205	TRUE	Empty	hypothetical protein SAOUHSC_00318 [Staphylococcus aureus subsp. aureus NCTC 8325]	gi|88194119		36 kDa		0.5	0.5	[]	unknown	2	2	1	0	0	0
1206	TRUE	Empty	fructokinase [Staphylococcus aureus subsp. aureus NCTC 8325]	gi|88195937		35 kDa		0.38	0.7	[]	unknown	6	6	4	2	0	0
1207	TRUE	Empty	MULTISPECIES: hypothetical protein [Bacteria]	gi|446744905		15 kDa		0.25	INF	[]	unknown	0	1	2	0	0	0
1208	TRUE	Empty	RecName: Full=Putative N-acetylmannosamine-6-phosphate 2-epimerase; AltName: Full=ManNAc-6-P epimerase	gi|122540263		25 kDa		0.5	0	[]	unknown	1	1	0	0	0	0
1209	TRUE	Empty	RecName: Full=Mini-ribonuclease 3; Short=Mini-3; Short=Mini-RNase 3; AltName: Full=Mini-RNase III; Short=Mini-III	gi|122540661		16 kDa		0.5	2	[]	unknown	1	2	2	1	1	0
1210	TRUE	Empty	MULTISPECIES: hypothetical protein [Bacteria]	gi|447014748		14 kDa		0.5	0.7	[]	unknown	3	3	2	1	0	0
1211	TRUE	Empty	hypothetical protein SAOUHSC_01024 [Staphylococcus aureus subsp. aureus NCTC 8325]	gi|88194777		5 kDa		0.5	0.8	[]	unknown	5	7	4	4	3	3
1212	TRUE	Empty	MULTISPECIES: dihydrofolate reductase [Bacteria]	gi|446097891		18 kDa		0.5	0	[]	unknown	1	0	0	0	0	0
1213	TRUE	Empty	Laccase SACOL1200 [Staphylococcus aureus]	gi|446922082		30 kDa	TRUE	0.64	1	[]	unknown	4	3	4	0	0	0
1214	TRUE	Empty	hypothetical protein SAOUHSC_01476 [Staphylococcus aureus subsp. aureus NCTC 8325]	gi|88195193		12 kDa		0.5	1.5	[]	unknown	2	3	3	0	1	0
1215	TRUE	Empty	hypothetical protein SAOUHSC_01957 [Staphylococcus aureus subsp. aureus NCTC 8325]	gi|88195650		31 kDa		0.5	0	[]	unknown	1	2	0	0	0	0
1216	TRUE	Empty	MULTISPECIES: hypothetical protein [Bacteria]	gi|446291047		17 kDa		0.75	1	[]	unknown	1	2	1	2	0	0
1217	TRUE	Empty	hypothetical protein SAOUHSC_01464 [Staphylococcus aureus subsp. aureus NCTC 8325]	gi|88195181		14 kDa		0.5	0.7	[]	unknown	3	3	2	2	0	0
1218	TRUE	Empty	MULTISPECIES: 16S rRNA methyltransferase [Bacteria]	gi|446202071		31 kDa		0.69	1	[]	unknown	2	2	2	0	0	0
1219	TRUE	Empty	hypothetical protein SAOUHSC_02726 [Staphylococcus aureus subsp. aureus NCTC 8325]	gi|88196366		18 kDa		0.25	0	[]	unknown	2	2	0	0	0	0
1220	TRUE	Empty	RecName: Full=UPF0738 protein SAOUHSC_00941	gi|122540492		14 kDa		0.34	2	[]	unknown	2	4	4	3	2	0
1221	TRUE	Empty	RecName: Full=Ribonuclease HII; Short=RNase HII	gi|122539702		29 kDa		0.5	0	[]	unknown	1	0	0	0	0	0
1222	TRUE	Empty	energy-coupling factor transporter ATPase [Staphylococcus aureus]	gi|446311807		30 kDa		0.5	2	[]	unknown	1	2	2	0	0	0
1223	TRUE	Empty	hypothetical protein SAOUHSC_00719 [Staphylococcus aureus subsp. aureus NCTC 8325]	gi|88194484		27 kDa		0.12	0	[]	unknown	3	2	0	0	0	0
1224	TRUE	Empty	hypothetical protein SAOUHSC_00305 [Staphylococcus aureus subsp. aureus NCTC 8325]	gi|161353536		12 kDa		0.38	1.5	[]	unknown	4	7	6	1	0	0
1225	TRUE	Empty	MULTISPECIES: hypothetical protein [Bacteria]	gi|446587392		20 kDa		0.34	0.5	[]	unknown	4	3	2	0	0	0
1226	TRUE	Empty	RecName: Full=Holliday junction ATP-dependent DNA helicase RuvB	gi|123407042		38 kDa		0.75	1	[]	unknown	1	1	1	1	0	0
1227	TRUE	Empty	hypothetical protein SAOUHSC_01091 [Staphylococcus aureus subsp. aureus NCTC 8325]	gi|88194838		27 kDa		0.5	1.2	[]	unknown	6	5	7	3	1	0
1228	TRUE	Empty	RecName: Full=tRNA pseudouridine synthase A; AltName: Full=tRNA pseudouridine(38-40) synthase; AltName: Full=tRNA pseudouridylate synthase I; AltName: Full=tRNA-uridine isomerase I	gi|123098008		31 kDa		0.5	0	[]	unknown	1	2	0	0	0	0
1229	TRUE	Empty	hypothetical protein SAOUHSC_01156 [Staphylococcus aureus subsp. aureus NCTC 8325]	gi|88194897		31 kDa		1	INF	[]	unknown	0	1	0	0	0	0
1230	TRUE	Empty	hypothetical protein SAOUHSC_01077 [Staphylococcus aureus subsp. aureus NCTC 8325]	gi|88194826		21 kDa		0.69	1	[]	unknown	2	5	2	3	1	0
1231	TRUE	Empty	hypothetical protein SAOUHSC_02894 [Staphylococcus aureus subsp. aureus NCTC 8325]	gi|88196522		14 kDa		0.5	2	[]	unknown	1	1	2	0	0	0
1232	TRUE	Empty	RecName: Full=50S ribosomal protein L24	gi|123291760		12 kDa		0.61	1	[]	unknown	6	8	6	3	2	0
1233	TRUE	Empty	hypothetical protein SAOUHSC_02357 [Staphylococcus aureus subsp. aureus NCTC 8325]	gi|88196020		40 kDa		0.062	0.2	[]	unknown	6	2	1	1	0	0
1234	TRUE	Empty	MULTISPECIES: peptidase M23 [Bacteria]	gi|446378006		17 kDa		0.031	0	[]	unknown	5	4	0	1	2	0
1235	TRUE	Empty	ribosome maturation factor RimM [Staphylococcus aureus]	gi|447184724		19 kDa		0.5	0.8	[]	unknown	4	3	3	2	2	0
1236	TRUE	Empty	RecName: Full=Cyclic pyranopterin monophosphate synthase accessory protein; AltName: Full=Molybdenum cofactor biosynthesis protein C	gi|123003428		18 kDa		0.19	0.2	[]	unknown	4	2	1	1	0	0
1237	TRUE	Empty	MULTISPECIES: DNA-binding protein [Bacteria]	gi|447168546		7 kDa		0.5	2	[]	unknown	1	3	2	0	0	0
1238	TRUE	Empty	ribose-5-phosphate isomerase A [Staphylococcus aureus]	gi|446578518		26 kDa		0.5	0.5	[]	unknown	2	1	1	0	1	0
1239	TRUE	Empty	DNA polymerase III subunit delta [Staphylococcus aureus subsp. aureus NCTC 8325]	gi|88195396		38 kDa		0.5	INF	[]	unknown	0	0	1	0	0	0
1240	TRUE	Empty	hypothetical protein SAOUHSC_02335 [Staphylococcus aureus subsp. aureus NCTC 8325]	gi|88196001		19 kDa		0.5	2	[]	unknown	1	3	2	2	2	0
1241	TRUE	Empty	hypothetical protein SAOUHSC_02651 [Staphylococcus aureus subsp. aureus NCTC 8325]	gi|88196291		20 kDa		0.36	1.7	[]	unknown	3	3	5	0	0	0
1242	TRUE	Empty	hypothetical protein [Staphylococcus aureus]	gi|447086163		18 kDa		0.5	2	[]	unknown	1	1	2	0	0	0
1243	TRUE	Empty	MULTISPECIES: hypothetical protein [Bacteria]	gi|446745959		34 kDa		0.62	1	[]	unknown	5	5	5	0	2	0
1244	TRUE	Empty	hypothetical protein SAOUHSC_01729 [Staphylococcus aureus subsp. aureus NCTC 8325]	gi|88195434		6 kDa		0.69	1	[]	unknown	2	2	2	1	0	0
1245	TRUE	Empty	MULTISPECIES: cell-wall-binding lipoprotein [Bacteria]	gi|446590993		24 kDa		0.5	0	[]	unknown	1	1	0	0	0	0
1246	TRUE	Empty	conserved hypothetical protein [Staphylococcus aureus subsp. aureus NCTC 8325]	gi|87203758		7 kDa		0.5	2	[]	unknown	1	1	2	0	0	0
1247	TRUE	Empty	hypothetical protein SAOUHSC_01456 [Staphylococcus aureus subsp. aureus NCTC 8325]	gi|88195175-DECOY		?		1	INF	[]	unknown	0	0	0	0	0	1
1248	TRUE	Empty	hypothetical protein SAOUHSC_00244 [Staphylococcus aureus subsp. aureus NCTC 8325]	gi|88194051		16 kDa		0.75	1	[]	unknown	1	2	1	0	0	0
1249	TRUE	Empty	RecName: Full=2-isopropylmalate synthase; AltName: Full=Alpha-IPM synthase; AltName: Full=Alpha-isopropylmalate synthase	gi|122538997		56 kDa		1	INF	[]	unknown	0	1	0	0	0	0
1250	TRUE	Empty	HrcA family transcriptional regulator [Staphylococcus aureus]	gi|446549794		37 kDa		0.5	INF	[]	unknown	0	1	1	0	0	0
1251	TRUE	Empty	hypothetical protein SAOUHSC_01324 [Staphylococcus aureus subsp. aureus NCTC 8325]	gi|88195054		12 kDa		0.5	0.7	[]	unknown	3	2	2	0	0	0
1252	TRUE	Empty	MULTISPECIES: HxlR family transcriptional regulator [Bacteria]	gi|446373583		13 kDa		0.0058	0.1	[]	unknown	10	5	1	3	4	0
1253	TRUE	Empty	RecName: Full=Acylphosphatase; AltName: Full=Acylphosphate phosphohydrolase	gi|122539587		10 kDa		0.66	1	[]	unknown	3	8	3	4	2	0
1254	TRUE	Empty	RecName: Full=Probable transglycosylase SceD; Flags: Precursor	gi|122538961		24 kDa		0.36	0.6	[]	unknown	5	3	3	2	0	0
1255	TRUE	Empty	PVL orf 50-like protein [Staphylococcus aureus subsp. aureus NCTC 8325]	gi|88195274		17 kDa		1	INF	[]	unknown	0	0	0	0	0	0
1256	TRUE	Empty	hypothetical protein SAOUHSC_01488 [Staphylococcus aureus subsp. aureus NCTC 8325]	gi|88195205		22 kDa		0.14	0.3	[]	unknown	6	3	2	1	1	0
1257	TRUE	Empty	hypothetical protein SAOUHSC_00663 [Staphylococcus aureus subsp. aureus NCTC 8325]	gi|88194428		19 kDa		0.5	1.5	[]	unknown	2	1	3	0	0	0
1258	TRUE	Empty	hypothetical protein SAOUHSC_01988 [Staphylococcus aureus subsp. aureus NCTC 8325]	gi|88195679		18 kDa		0.25	0	[]	unknown	2	0	0	0	0	0
1259	TRUE	Empty	MULTISPECIES: DNA-binding protein [Bacteria]	gi|446453465		14 kDa		0.23	2.5	[]	unknown	2	4	5	0	0	0
1260	TRUE	Empty	MULTISPECIES: hypothetical protein [Bacteria]	gi|446279108		8 kDa		0.38	0.7	[]	unknown	6	5	4	2	0	0
1261	TRUE	Empty	RecName: Full=ATP synthase subunit b; AltName: Full=ATP synthase F(0) sector subunit b; AltName: Full=ATPase subunit I; AltName: Full=F-type ATPase subunit b; Short=F-ATPase subunit b	gi|122540612-DECOY		?		0.5	INF	[]	unknown	0	0	1	0	0	0
1262	TRUE	Empty	hypothetical protein SAOUHSC_02936 [Staphylococcus aureus subsp. aureus NCTC 8325]	gi|88196563		26 kDa		0.5	0.5	[]	unknown	2	1	1	1	0	0
1263	TRUE	Empty	hypothetical protein SAOUHSC_00463 [Staphylococcus aureus subsp. aureus NCTC 8325]	gi|88194250		20 kDa		0.25	0	[]	unknown	2	3	0	0	0	0
1264	TRUE	Empty	RecName: Full=Uncharacterized protein SAOUHSC_00094; Flags: Precursor	gi|122540536		22 kDa		0.12	0	[]	unknown	3	3	0	1	2	4
1265	TRUE	Empty	hypothetical protein SAOUHSC_00285 [Staphylococcus aureus subsp. aureus NCTC 8325]	gi|88194088		38 kDa		0.5	0	[]	unknown	1	1	0	0	0	0
1266	TRUE	Empty	MULTISPECIES: hypothetical protein [Bacteria]	gi|447050013		13 kDa		0.5	0	[]	unknown	1	1	0	0	0	0
1267	TRUE	Empty	isochorismatase [Staphylococcus aureus]	gi|487720209		21 kDa		1	INF	[]	unknown	0	0	0	0	0	0
1268	TRUE	Empty	hypothetical protein SAOUHSC_02130 [Staphylococcus aureus subsp. aureus NCTC 8325]	gi|88195810		7 kDa		1	INF	[]	unknown	0	0	0	0	0	0
1269	TRUE	Empty	MULTISPECIES: ribosomal RNA small subunit methyltransferase G [Bacteria]	gi|446137740		27 kDa		0.75	1	[]	unknown	1	2	1	0	0	0
1270	TRUE	Empty	hypothetical protein [Staphylococcus aureus]	gi|486201902		27 kDa		0.5	INF	[]	unknown	0	0	1	0	0	0
1271	TRUE	Empty	MULTISPECIES: membrane protein [Bacteria]	gi|446951120		40 kDa		0.5	INF	[]	unknown	0	0	1	0	0	0
1272	TRUE	Empty	hypothetical protein SAOUHSC_02727 [Staphylococcus aureus subsp. aureus NCTC 8325]	gi|88196367		22 kDa	TRUE	0.75	1	[]	unknown	1	4	1	0	0	0
1273	TRUE	Empty	MULTISPECIES: hypothetical protein [Bacteria]	gi|445992971		24 kDa		0.5	INF	[]	unknown	0	1	1	0	0	0
1274	TRUE	Empty	hypothetical protein SAOUHSC_00862 [Staphylococcus aureus subsp. aureus NCTC 8325]	gi|88194619		15 kDa		0.75	1	[]	unknown	1	2	1	0	0	0
1275	TRUE	Empty	MULTISPECIES: hypothetical protein [Bacteria]	gi|445931214		50 kDa		0.5	0	[]	unknown	1	3	0	0	0	0
1276	TRUE	Empty	RecName: Full=Pyruvate formate-lyase-activating enzyme; Short=PFL-activating enzyme	gi|122064908		28 kDa		0.12	0	[]	unknown	3	2	0	0	0	0
[truncated: 187 more rows]

## Sheet: TM 1mMCu to TM
#150811_Waldron_whole_cells, Samples Report created on 05/03/2018
[truncated: 1,467 more rows]

## Sheet: TM 1.5mMCu to TM
#150811_Waldron_whole_cells, Samples Report created on 05/03/2018
[truncated: 1,467 more rows]
